# Supplementary material for: A hybrid gene selection approach to create the S1500+ targeted gene sets for use in high-throughput transcriptomics
Source: PLoS One. 2018 Feb 20;13(2):e0191105. doi: 10.1371/journal.pone.0191105 (PMC5819766; doi:10.1371/journal.pone.0191105)
Supplement: S4 File — This is a compressed tab delimited file which provides a listing of GEO accession identifiers for samples that are utilized to produce each of 4,089 differential expression profiles from the test dataset. This file contains the following columns: “Series”–GEO series identifier “ID”–Unique identifier for differential expression profile (A vs. B comparison) “Samples (A)”–GEO accession identifiers of samples that were annotated to condition “A” during the curation process (separated by “;” character) “Samples (B)”–GEO accession identifiers of samples that were annotated to condition “B” during the curation process (separated by “;” character). (GZ) [file pone.0191105.s004.gz › S4_File.txt]

"Series"t"ID"t"Samples (A)"t"Samples (B)"
"GSE15296"t"GSE15296:0000000:1"t"GSM382248;GSM382249;GSM382250;GSM382251;GSM382253;GSM382254;GSM382255;GSM382256;GSM382257;GSM382258;GSM382259;GSM382261;GSM382262;GSM382263;GSM382268;GSM382269;GSM382270;GSM382271;GSM382272;GSM382273;GSM382275;GSM382276;GSM382277;GSM382278;GSM382279;GSM382280;GSM382281;GSM382283;GSM382284;GSM382285;GSM382286;GSM382287;GSM382288;GSM382289;GSM382290;GSM382291;GSM382292;GSM382293;GSM382294;GSM382295;GSM382296;GSM382297;GSM382298;GSM382299;GSM382300;GSM382301;GSM382302;GSM382303;GSM382304;GSM382305;GSM382306"t"GSM382252;GSM382260;GSM382264;GSM382265;GSM382266;GSM382267;GSM382274;GSM382282;GSM382307;GSM382308;GSM382309;GSM382310;GSM382311;GSM382312;GSM382313;GSM382314;GSM382315;GSM382316;GSM382317;GSM382318;GSM382319;GSM382320;GSM382321;GSM382322"
"GSE16250"t"GSE16250:0000000:1"t"GSM409134;GSM409135;GSM409136"t"GSM409137;GSM409138;GSM409139"
"GSE16480"t"GSE16480:0000000:1"t"GSM414141;GSM414146;GSM414151"t"GSM414140;GSM414145;GSM414150"
"GSE16480"t"GSE16480:0000000:2"t"GSM414142;GSM414147;GSM414152"t"GSM414140;GSM414145;GSM414150"
"GSE16480"t"GSE16480:0000000:3"t"GSM414143;GSM414148;GSM414153"t"GSM414140;GSM414145;GSM414150"
"GSE16480"t"GSE16480:0000000:4"t"GSM414144;GSM414149;GSM414154"t"GSM414140;GSM414145;GSM414150"
"GSE16481"t"GSE16481:0000000:1"t"GSM414155;GSM414160;GSM414165"t"GSM414159;GSM414164;GSM414169"
"GSE16481"t"GSE16481:0000000:2"t"GSM414156;GSM414161;GSM414166"t"GSM414159;GSM414164;GSM414169"
"GSE16481"t"GSE16481:0000000:3"t"GSM414157;GSM414162;GSM414167"t"GSM414159;GSM414164;GSM414169"
"GSE16481"t"GSE16481:0000000:4"t"GSM414158;GSM414163;GSM414168"t"GSM414159;GSM414164;GSM414169"
"GSE19722"t"GSE19722:0000000:1"t"GSM252813;GSM252814;GSM252815;GSM252816;GSM252817;GSM252818;GSM252819;GSM252820;GSM252822;GSM252823;GSM252825;GSM252826;GSM252827;GSM256195;GSM256196;GSM256197;GSM256198;GSM256199;GSM256201;GSM256202;GSM256204;GSM256205;GSM256206;GSM256208;GSM256209;GSM256210;GSM256211;GSM256212;GSM492612;GSM492613;GSM492614;GSM492615"t"GSM252803;GSM252805;GSM252806;GSM252807;GSM256181;GSM256182;GSM256183;GSM256184;GSM256185;GSM256186;GSM256187;GSM256188;GSM256189;GSM256190;GSM256191;GSM256192;GSM256193;GSM256194;GSM492607;GSM492608;GSM492609;GSM492610"
"GSE22695"t"GSE22695:0:1"t"GSM562525"t"GSM385333"
"GSE22695"t"GSE22695:1:1"t"GSM562526"t"GSM385338"
"GSE22695"t"GSE22695:2:1"t"GSM562527"t"GSM385350"
"GSE22695"t"GSE22695:3:1"t"GSM562528"t"GSM385353"
"GSE23356"t"GSE23356:0000000:1"t"GSM573171"t"GSM573170"
"GSE23356"t"GSE23356:0000000:2"t"GSM573172"t"GSM573170"
"GSE23356"t"GSE23356:0000000:3"t"GSM573173"t"GSM573170"
"GSE25504"t"GSE25504:0000000:1"t"GSM1404211;GSM1404212"t"GSM1404208;GSM1404209;GSM1404210"
"GSE27890"t"GSE27890:0000000:1"t"GSM688785;GSM688787;GSM688789;GSM688790"t"GSM688786;GSM688788;GSM688791;GSM688792"
"GSE28654"t"GSE28654:0000000:1"t"GSM709859;GSM709861;GSM709862;GSM709873;GSM709874;GSM709885;GSM709891;GSM709895;GSM709896;GSM709898;GSM709906;GSM709907;GSM709908;GSM709913;GSM709922;GSM709927;GSM709930;GSM709940;GSM709941;GSM709943;GSM709945;GSM709947;GSM709950;GSM709951;GSM709961;GSM709962;GSM709965;GSM709966"t"GSM709860;GSM709863;GSM709864;GSM709865;GSM709866;GSM709867;GSM709868;GSM709869;GSM709870;GSM709871;GSM709872;GSM709876;GSM709877;GSM709879;GSM709880;GSM709882;GSM709883;GSM709884;GSM709886;GSM709887;GSM709889;GSM709890;GSM709892;GSM709893;GSM709894;GSM709897;GSM709899;GSM709900;GSM709901;GSM709903;GSM709909;GSM709910;GSM709912;GSM709914;GSM709916;GSM709917;GSM709919;GSM709920;GSM709921;GSM709924;GSM709925;GSM709926;GSM709928;GSM709929;GSM709931;GSM709932;GSM709933;GSM709935;GSM709936;GSM709938;GSM709944;GSM709948;GSM709949;GSM709953;GSM709957;GSM709958;GSM709959;GSM709960;GSM709964;GSM709968;GSM709970"
"GSE28654"t"GSE28654:0000000:2"t"GSM709875;GSM709878;GSM709881;GSM709888;GSM709902;GSM709904;GSM709905;GSM709911;GSM709915;GSM709918;GSM709923;GSM709934;GSM709937;GSM709939;GSM709942;GSM709946;GSM709952;GSM709954;GSM709955;GSM709956;GSM709963;GSM709967;GSM709969"t"GSM709860;GSM709863;GSM709864;GSM709865;GSM709866;GSM709867;GSM709868;GSM709869;GSM709870;GSM709871;GSM709872;GSM709876;GSM709877;GSM709879;GSM709880;GSM709882;GSM709883;GSM709884;GSM709886;GSM709887;GSM709889;GSM709890;GSM709892;GSM709893;GSM709894;GSM709897;GSM709899;GSM709900;GSM709901;GSM709903;GSM709909;GSM709910;GSM709912;GSM709914;GSM709916;GSM709917;GSM709919;GSM709920;GSM709921;GSM709924;GSM709925;GSM709926;GSM709928;GSM709929;GSM709931;GSM709932;GSM709933;GSM709935;GSM709936;GSM709938;GSM709944;GSM709948;GSM709949;GSM709953;GSM709957;GSM709958;GSM709959;GSM709960;GSM709964;GSM709968;GSM709970"
"GSE29330"t"GSE29330:0000000:1"t"GSM724644;GSM724645;GSM724646;GSM724647;GSM724648;GSM724649;GSM724650;GSM724651;GSM724652;GSM724653;GSM724654;GSM724655;GSM724656"t"GSM724657;GSM724658;GSM724659;GSM724660;GSM724661"
"GSE29370"t"GSE29370:0000000:1"t"GSM725975;GSM725976"t"GSM725974"
"GSE29370"t"GSE29370:0000000:2"t"GSM725977;GSM725978;GSM725979;GSM725980;GSM725981;GSM725982;GSM725983;GSM725984;GSM725985;GSM725986;GSM725987;GSM725988;GSM725989;GSM725990;GSM725991;GSM725992;GSM725993;GSM725994;GSM725995"t"GSM725974"
"GSE29977"t"GSE29977:0000000:1"t"GSM742016;GSM742017;GSM742018;GSM742019;GSM742020"t"GSM742011;GSM742012;GSM742013;GSM742014;GSM742015"
"GSE30470"t"GSE30470:0000000:01"t"GSM755823"t"GSM755822"
"GSE30470"t"GSE30470:0000000:02"t"GSM755824"t"GSM755822"
"GSE30470"t"GSE30470:0000000:03"t"GSM755825"t"GSM755822"
"GSE30470"t"GSE30470:0000000:04"t"GSM755826"t"GSM755822"
"GSE30470"t"GSE30470:0000000:05"t"GSM755827"t"GSM755822"
"GSE30470"t"GSE30470:0000000:06"t"GSM755828"t"GSM755822"
"GSE30470"t"GSE30470:0000000:07"t"GSM755829"t"GSM755822"
"GSE30470"t"GSE30470:0000000:08"t"GSM755830"t"GSM755822"
"GSE30470"t"GSE30470:0000000:09"t"GSM755831"t"GSM755822"
"GSE30470"t"GSE30470:0000000:10"t"GSM755832"t"GSM755822"
"GSE30470"t"GSE30470:0000000:11"t"GSM755833"t"GSM755822"
"GSE30470"t"GSE30470:0000000:12"t"GSM755834"t"GSM755822"
"GSE30470"t"GSE30470:0000000:13"t"GSM755835"t"GSM755822"
"GSE30470"t"GSE30470:0000000:14"t"GSM755836"t"GSM755822"
"GSE30470"t"GSE30470:0000000:15"t"GSM755837"t"GSM755822"
"GSE30470"t"GSE30470:0000000:16"t"GSM755838"t"GSM755822"
"GSE30470"t"GSE30470:0000000:17"t"GSM755839"t"GSM755822"
"GSE30470"t"GSE30470:0000000:18"t"GSM755840"t"GSM755822"
"GSE30470"t"GSE30470:0000000:19"t"GSM755841"t"GSM755822"
"GSE30470"t"GSE30470:0000000:20"t"GSM755842"t"GSM755822"
"GSE31473"t"GSE31473:0000000:1"t"GSM782014;GSM782015;GSM782016"t"GSM782011;GSM782012;GSM782013"
"GSE33532"t"GSE33532:01:1"t"GSM835268;GSM835313"t"GSM835272;GSM835317"
"GSE33532"t"GSE33532:01:2"t"GSM835269;GSM835314"t"GSM835272;GSM835317"
"GSE33532"t"GSE33532:01:3"t"GSM835270;GSM835315"t"GSM835272;GSM835317"
"GSE33532"t"GSE33532:01:4"t"GSM835271;GSM835316"t"GSM835272;GSM835317"
"GSE33532"t"GSE33532:02:1"t"GSM835273;GSM835363"t"GSM835277;GSM835367"
"GSE33532"t"GSE33532:02:2"t"GSM835274;GSM835364"t"GSM835277;GSM835367"
"GSE33532"t"GSE33532:02:3"t"GSM835275;GSM835365"t"GSM835277;GSM835367"
"GSE33532"t"GSE33532:02:4"t"GSM835276;GSM835366"t"GSM835277;GSM835367"
"GSE33532"t"GSE33532:03:1"t"GSM835278"t"GSM835282"
"GSE33532"t"GSE33532:03:2"t"GSM835279"t"GSM835282"
"GSE33532"t"GSE33532:03:3"t"GSM835280"t"GSM835282"
"GSE33532"t"GSE33532:03:4"t"GSM835281"t"GSM835282"
"GSE33532"t"GSE33532:04:1"t"GSM835283"t"GSM835287"
"GSE33532"t"GSE33532:04:2"t"GSM835284"t"GSM835287"
"GSE33532"t"GSE33532:04:3"t"GSM835285"t"GSM835287"
"GSE33532"t"GSE33532:04:4"t"GSM835286"t"GSM835287"
"GSE33532"t"GSE33532:05:1"t"GSM835288"t"GSM835292"
"GSE33532"t"GSE33532:05:2"t"GSM835289"t"GSM835292"
"GSE33532"t"GSE33532:05:3"t"GSM835290"t"GSM835292"
"GSE33532"t"GSE33532:05:4"t"GSM835291"t"GSM835292"
"GSE33532"t"GSE33532:06:1"t"GSM835293"t"GSM835297"
"GSE33532"t"GSE33532:06:2"t"GSM835294"t"GSM835297"
"GSE33532"t"GSE33532:06:3"t"GSM835295"t"GSM835297"
"GSE33532"t"GSE33532:06:4"t"GSM835296"t"GSM835297"
"GSE33532"t"GSE33532:07:1"t"GSM835298"t"GSM835302"
"GSE33532"t"GSE33532:07:2"t"GSM835299"t"GSM835302"
"GSE33532"t"GSE33532:07:3"t"GSM835300"t"GSM835302"
"GSE33532"t"GSE33532:07:4"t"GSM835301"t"GSM835302"
"GSE33532"t"GSE33532:08:1"t"GSM835303"t"GSM835307"
"GSE33532"t"GSE33532:08:2"t"GSM835304"t"GSM835307"
"GSE33532"t"GSE33532:08:3"t"GSM835305"t"GSM835307"
"GSE33532"t"GSE33532:08:4"t"GSM835306"t"GSM835307"
"GSE33532"t"GSE33532:09:1"t"GSM835308"t"GSM835312"
"GSE33532"t"GSE33532:09:2"t"GSM835309"t"GSM835312"
"GSE33532"t"GSE33532:09:3"t"GSM835310"t"GSM835312"
"GSE33532"t"GSE33532:09:4"t"GSM835311"t"GSM835312"
"GSE33532"t"GSE33532:11:1"t"GSM835318"t"GSM835322"
"GSE33532"t"GSE33532:11:2"t"GSM835319"t"GSM835322"
"GSE33532"t"GSE33532:11:3"t"GSM835320"t"GSM835322"
"GSE33532"t"GSE33532:11:4"t"GSM835321"t"GSM835322"
"GSE33532"t"GSE33532:12:1"t"GSM835323"t"GSM835327"
"GSE33532"t"GSE33532:12:2"t"GSM835324"t"GSM835327"
"GSE33532"t"GSE33532:12:3"t"GSM835325"t"GSM835327"
"GSE33532"t"GSE33532:12:4"t"GSM835326"t"GSM835327"
"GSE33532"t"GSE33532:13:1"t"GSM835328"t"GSM835332"
"GSE33532"t"GSE33532:13:2"t"GSM835329"t"GSM835332"
"GSE33532"t"GSE33532:13:3"t"GSM835330"t"GSM835332"
"GSE33532"t"GSE33532:13:4"t"GSM835331"t"GSM835332"
"GSE33532"t"GSE33532:14:1"t"GSM835333"t"GSM835337"
"GSE33532"t"GSE33532:14:2"t"GSM835334"t"GSM835337"
"GSE33532"t"GSE33532:14:3"t"GSM835335"t"GSM835337"
"GSE33532"t"GSE33532:14:4"t"GSM835336"t"GSM835337"
"GSE33532"t"GSE33532:15:1"t"GSM835338"t"GSM835342"
"GSE33532"t"GSE33532:15:2"t"GSM835339"t"GSM835342"
"GSE33532"t"GSE33532:15:3"t"GSM835340"t"GSM835342"
"GSE33532"t"GSE33532:15:4"t"GSM835341"t"GSM835342"
"GSE33532"t"GSE33532:16:1"t"GSM835343"t"GSM835347"
"GSE33532"t"GSE33532:16:2"t"GSM835344"t"GSM835347"
"GSE33532"t"GSE33532:16:3"t"GSM835345"t"GSM835347"
"GSE33532"t"GSE33532:16:4"t"GSM835346"t"GSM835347"
"GSE33532"t"GSE33532:17:1"t"GSM835348"t"GSM835352"
"GSE33532"t"GSE33532:17:2"t"GSM835349"t"GSM835352"
"GSE33532"t"GSE33532:17:3"t"GSM835350"t"GSM835352"
"GSE33532"t"GSE33532:17:4"t"GSM835351"t"GSM835352"
"GSE33532"t"GSE33532:18:1"t"GSM835353"t"GSM835357"
"GSE33532"t"GSE33532:18:2"t"GSM835354"t"GSM835357"
"GSE33532"t"GSE33532:18:3"t"GSM835355"t"GSM835357"
"GSE33532"t"GSE33532:18:4"t"GSM835356"t"GSM835357"
"GSE33532"t"GSE33532:19:1"t"GSM835358"t"GSM835362"
"GSE33532"t"GSE33532:19:2"t"GSM835359"t"GSM835362"
"GSE33532"t"GSE33532:19:3"t"GSM835360"t"GSM835362"
"GSE33532"t"GSE33532:19:4"t"GSM835361"t"GSM835362"
"GSE34942"t"GSE34942:0000000:01"t"GSM858083"t"GSM858082"
"GSE34942"t"GSE34942:0000000:02"t"GSM858084"t"GSM858082"
"GSE34942"t"GSE34942:0000000:03"t"GSM858085"t"GSM858082"
"GSE34942"t"GSE34942:0000000:04"t"GSM858086"t"GSM858082"
"GSE34942"t"GSE34942:0000000:05"t"GSM858087"t"GSM858082"
"GSE34942"t"GSE34942:0000000:06"t"GSM858088"t"GSM858082"
"GSE34942"t"GSE34942:0000000:07"t"GSM858089"t"GSM858082"
"GSE34942"t"GSE34942:0000000:08"t"GSM858090"t"GSM858082"
"GSE34942"t"GSE34942:0000000:09"t"GSM858091"t"GSM858082"
"GSE34942"t"GSE34942:0000000:10"t"GSM858092"t"GSM858082"
"GSE34942"t"GSE34942:0000000:11"t"GSM858093"t"GSM858082"
"GSE34942"t"GSE34942:0000000:12"t"GSM858094"t"GSM858082"
"GSE34942"t"GSE34942:0000000:13"t"GSM858095"t"GSM858082"
"GSE34942"t"GSE34942:0000000:14"t"GSM858096"t"GSM858082"
"GSE34942"t"GSE34942:0000000:15"t"GSM858097"t"GSM858082"
"GSE34942"t"GSE34942:0000000:16"t"GSM858098"t"GSM858082"
"GSE34942"t"GSE34942:0000000:17"t"GSM858099"t"GSM858082"
"GSE34942"t"GSE34942:0000000:18"t"GSM858100"t"GSM858082"
"GSE34942"t"GSE34942:0000000:19"t"GSM858101"t"GSM858082"
"GSE34942"t"GSE34942:0000000:20"t"GSM858102"t"GSM858082"
"GSE34942"t"GSE34942:0000000:21"t"GSM858103"t"GSM858082"
"GSE34942"t"GSE34942:0000000:22"t"GSM858104"t"GSM858082"
"GSE34942"t"GSE34942:0000000:23"t"GSM858105"t"GSM858082"
"GSE34942"t"GSE34942:0000000:24"t"GSM858106"t"GSM858082"
"GSE34942"t"GSE34942:0000000:25"t"GSM858107"t"GSM858082"
"GSE34942"t"GSE34942:0000000:26"t"GSM858108"t"GSM858082"
"GSE34942"t"GSE34942:0000000:27"t"GSM858109"t"GSM858082"
"GSE34942"t"GSE34942:0000000:28"t"GSM858110"t"GSM858082"
"GSE34942"t"GSE34942:0000000:29"t"GSM858111"t"GSM858082"
"GSE34942"t"GSE34942:0000000:30"t"GSM858112"t"GSM858082"
"GSE34942"t"GSE34942:0000000:31"t"GSM858113"t"GSM858082"
"GSE34942"t"GSE34942:0000000:32"t"GSM858114"t"GSM858082"
"GSE34942"t"GSE34942:0000000:33"t"GSM858115"t"GSM858082"
"GSE34942"t"GSE34942:0000000:34"t"GSM858116"t"GSM858082"
"GSE34942"t"GSE34942:0000000:35"t"GSM858117"t"GSM858082"
"GSE34942"t"GSE34942:0000000:36"t"GSM858118"t"GSM858082"
"GSE34942"t"GSE34942:0000000:37"t"GSM858119"t"GSM858082"
"GSE34942"t"GSE34942:0000000:38"t"GSM858120"t"GSM858082"
"GSE34942"t"GSE34942:0000000:39"t"GSM858121"t"GSM858082"
"GSE34942"t"GSE34942:0000000:40"t"GSM858122"t"GSM858082"
"GSE34942"t"GSE34942:0000000:41"t"GSM858123"t"GSM858082"
"GSE34942"t"GSE34942:0000000:42"t"GSM858124"t"GSM858082"
"GSE34942"t"GSE34942:0000000:43"t"GSM858125"t"GSM858082"
"GSE34942"t"GSE34942:0000000:44"t"GSM858126"t"GSM858082"
"GSE34942"t"GSE34942:0000000:45"t"GSM858127"t"GSM858082"
"GSE34942"t"GSE34942:0000000:46"t"GSM858128"t"GSM858082"
"GSE34942"t"GSE34942:0000000:47"t"GSM858129"t"GSM858082"
"GSE34942"t"GSE34942:0000000:48"t"GSM858130"t"GSM858082"
"GSE34942"t"GSE34942:0000000:49"t"GSM858131"t"GSM858082"
"GSE34942"t"GSE34942:0000000:50"t"GSM858132"t"GSM858082"
"GSE34942"t"GSE34942:0000000:51"t"GSM858133"t"GSM858082"
"GSE34942"t"GSE34942:0000000:52"t"GSM858134"t"GSM858082"
"GSE34942"t"GSE34942:0000000:53"t"GSM858135"t"GSM858082"
"GSE34942"t"GSE34942:0000000:54"t"GSM858136"t"GSM858082"
"GSE34942"t"GSE34942:0000000:55"t"GSM858137"t"GSM858082"
"GSE35068"t"GSE35068:0:1"t"GSM861623;GSM861624;GSM861625"t"GSM861629;GSM861630;GSM861631"
"GSE35068"t"GSE35068:1:1"t"GSM861626;GSM861627;GSM861628"t"GSM861632;GSM861633;GSM861634"
"GSE35928"t"GSE35928:0000000:1"t"GSM877554;GSM877555;GSM877556"t"GSM877551;GSM877552;GSM877553"
"GSE35975"t"GSE35975:0000000:1"t"GSM878359"t"GSM878358"
"GSE36076"t"GSE36076:0000000:1"t"GSM880774;GSM880775;GSM880776"t"GSM880787;GSM880788;GSM880789;GSM880790;GSM880791;GSM880792;GSM880793;GSM880794;GSM880795;GSM880796"
"GSE36076"t"GSE36076:0000000:2"t"GSM880777;GSM880778;GSM880779;GSM880780;GSM880781;GSM880782;GSM880783;GSM880784;GSM880785;GSM880786"t"GSM880787;GSM880788;GSM880789;GSM880790;GSM880791;GSM880792;GSM880793;GSM880794;GSM880795;GSM880796"
"GSE36076"t"GSE36076:0000000:3"t"GSM880797;GSM880798;GSM880799"t"GSM880787;GSM880788;GSM880789;GSM880790;GSM880791;GSM880792;GSM880793;GSM880794;GSM880795;GSM880796"
"GSE36110"t"GSE36110:0000000:1"t"GSM881259;GSM881260"t"GSM881253;GSM881254"
"GSE36110"t"GSE36110:0000000:2"t"GSM881261;GSM881262;GSM881263"t"GSM881253;GSM881254"
"GSE36110"t"GSE36110:0000000:3"t"GSM881266;GSM881267"t"GSM881253;GSM881254"
"GSE36110"t"GSE36110:0000000:4"t"GSM881268;GSM881269"t"GSM881253;GSM881254"
"GSE36110"t"GSE36110:0000000:5"t"GSM881281;GSM881282;GSM881283"t"GSM881253;GSM881254"
"GSE36110"t"GSE36110:0000000:6"t"GSM881284;GSM881285;GSM881286"t"GSM881253;GSM881254"
"GSE36110"t"GSE36110:0000000:7"t"GSM881294;GSM881295"t"GSM881253;GSM881254"
"GSE36441"t"GSE36441:0000000:1"t"GSM893548;GSM893549;GSM893550"t"GSM893545;GSM893546;GSM893547"
"GSE36923"t"GSE36923:0000000:1"t"GSM906373;GSM906374;GSM906375"t"GSM906367;GSM906368;GSM906369"
"GSE36923"t"GSE36923:0000000:2"t"GSM906370;GSM906371;GSM906372"t"GSM906367;GSM906368;GSM906369"
"GSE36923"t"GSE36923:0000000:3"t"GSM906376;GSM906377;GSM906378"t"GSM906367;GSM906368;GSM906369"
"GSE37044"t"GSE37044:0000000:1"t"GSM909290"t"GSM909289"
"GSE37045"t"GSE37045:0000000:1"t"GSM909292;GSM909293"t"GSM909291"
"GSE37212"t"GSE37212:0:1"t"GSM913897;GSM913903"t"GSM913896;GSM913902"
"GSE37212"t"GSE37212:1:1"t"GSM913899;GSM913905"t"GSM913898;GSM913904"
"GSE37212"t"GSE37212:2:1"t"GSM913901;GSM913907"t"GSM913900;GSM913906"
"GSE37243"t"GSE37243:0:1"t"GSM914187"t"GSM914188"
"GSE37243"t"GSE37243:1:1"t"GSM914189"t"GSM914190"
"GSE37603"t"GSE37603:0000000:1"t"GSM923117;GSM923118;GSM923119"t"GSM923114;GSM923115;GSM923116"
"GSE38494"t"GSE38494:0000000:1"t"GSM949787;GSM949788;GSM949789;GSM949790;GSM949791;GSM949792;GSM949793;GSM949794;GSM949795;GSM949796;GSM949797;GSM949798;GSM949799;GSM949800;GSM949801"t"GSM949814;GSM949815;GSM949816;GSM949817;GSM949818;GSM949819;GSM949820;GSM949821"
"GSE38494"t"GSE38494:0000000:2"t"GSM949802;GSM949803;GSM949804;GSM949805;GSM949806;GSM949807;GSM949808;GSM949809;GSM949810;GSM949811;GSM949812;GSM949813"t"GSM949814;GSM949815;GSM949816;GSM949817;GSM949818;GSM949819;GSM949820;GSM949821"
"GSE38662"t"GSE38662:01:1"t"GSM947169;GSM947170;GSM947185;GSM947186;GSM1183133;GSM1183143"t"GSM947167;GSM947168;GSM947183;GSM947184;GSM1183132;GSM1183142"
"GSE38662"t"GSE38662:02:1"t"GSM947189;GSM947190;GSM1183135"t"GSM947187;GSM947188;GSM1183134"
"GSE38662"t"GSE38662:03:1"t"GSM947145;GSM947146;GSM1183121"t"GSM947143;GSM947144;GSM1183120"
"GSE38662"t"GSE38662:04:1"t"GSM947149;GSM947150;GSM1183123"t"GSM947147;GSM947148;GSM1183122"
"GSE38662"t"GSE38662:05:1"t"GSM947173;GSM947174;GSM1183137"t"GSM947171;GSM947172;GSM1183136"
"GSE38662"t"GSE38662:06:1"t"GSM947153;GSM947154;GSM1183125"t"GSM947151;GSM947152;GSM1183124"
"GSE38662"t"GSE38662:07:1"t"GSM947157;GSM947158;GSM1183127"t"GSM947155;GSM947156;GSM1183126"
"GSE38662"t"GSE38662:08:1"t"GSM947177;GSM947178;GSM1183139"t"GSM947175;GSM947176;GSM1183138"
"GSE38662"t"GSE38662:09:1"t"GSM947181;GSM947182;GSM1183141"t"GSM947179;GSM947180;GSM1183140"
"GSE38662"t"GSE38662:11:1"t"GSM947161;GSM947162;GSM1183129"t"GSM947159;GSM947160;GSM1183128"
"GSE38662"t"GSE38662:12:1"t"GSM947165;GSM947166;GSM1183131"t"GSM947163;GSM947164;GSM1183130"
"GSE38678"t"GSE38678:0000000:1"t"GSM947448;GSM947449;GSM947450"t"GSM947457;GSM947458;GSM947459"
"GSE38678"t"GSE38678:0000000:2"t"GSM947451"t"GSM947457;GSM947458;GSM947459"
"GSE38678"t"GSE38678:0000000:3"t"GSM947452;GSM947453;GSM947454"t"GSM947457;GSM947458;GSM947459"
"GSE38678"t"GSE38678:0000000:4"t"GSM947455"t"GSM947457;GSM947458;GSM947459"
"GSE38678"t"GSE38678:0000000:5"t"GSM947456"t"GSM947457;GSM947458;GSM947459"
"GSE38832"t"GSE38832:0000000:001"t"GSM950412"t"GSM950411"
"GSE38832"t"GSE38832:0000000:002"t"GSM950413"t"GSM950411"
"GSE38832"t"GSE38832:0000000:003"t"GSM950414"t"GSM950411"
"GSE38832"t"GSE38832:0000000:004"t"GSM950415"t"GSM950411"
"GSE38832"t"GSE38832:0000000:005"t"GSM950416"t"GSM950411"
"GSE38832"t"GSE38832:0000000:006"t"GSM950417"t"GSM950411"
"GSE38832"t"GSE38832:0000000:007"t"GSM950418"t"GSM950411"
"GSE38832"t"GSE38832:0000000:008"t"GSM950419"t"GSM950411"
"GSE38832"t"GSE38832:0000000:009"t"GSM950420"t"GSM950411"
"GSE38832"t"GSE38832:0000000:010"t"GSM950421"t"GSM950411"
"GSE38832"t"GSE38832:0000000:011"t"GSM950422"t"GSM950411"
"GSE38832"t"GSE38832:0000000:012"t"GSM950423"t"GSM950411"
"GSE38832"t"GSE38832:0000000:013"t"GSM950424"t"GSM950411"
"GSE38832"t"GSE38832:0000000:014"t"GSM950425"t"GSM950411"
"GSE38832"t"GSE38832:0000000:015"t"GSM950426"t"GSM950411"
"GSE38832"t"GSE38832:0000000:016"t"GSM950427"t"GSM950411"
"GSE38832"t"GSE38832:0000000:017"t"GSM950428"t"GSM950411"
"GSE38832"t"GSE38832:0000000:018"t"GSM950429"t"GSM950411"
"GSE38832"t"GSE38832:0000000:019"t"GSM950430"t"GSM950411"
"GSE38832"t"GSE38832:0000000:020"t"GSM950431"t"GSM950411"
"GSE38832"t"GSE38832:0000000:021"t"GSM950432"t"GSM950411"
"GSE38832"t"GSE38832:0000000:022"t"GSM950433"t"GSM950411"
"GSE38832"t"GSE38832:0000000:023"t"GSM950434"t"GSM950411"
"GSE38832"t"GSE38832:0000000:024"t"GSM950435"t"GSM950411"
"GSE38832"t"GSE38832:0000000:025"t"GSM950436"t"GSM950411"
"GSE38832"t"GSE38832:0000000:026"t"GSM950437"t"GSM950411"
"GSE38832"t"GSE38832:0000000:027"t"GSM950438"t"GSM950411"
"GSE38832"t"GSE38832:0000000:028"t"GSM950439"t"GSM950411"
"GSE38832"t"GSE38832:0000000:029"t"GSM950440"t"GSM950411"
"GSE38832"t"GSE38832:0000000:030"t"GSM950441"t"GSM950411"
"GSE38832"t"GSE38832:0000000:031"t"GSM950442"t"GSM950411"
"GSE38832"t"GSE38832:0000000:032"t"GSM950443"t"GSM950411"
"GSE38832"t"GSE38832:0000000:033"t"GSM950444"t"GSM950411"
"GSE38832"t"GSE38832:0000000:034"t"GSM950445"t"GSM950411"
"GSE38832"t"GSE38832:0000000:035"t"GSM950446"t"GSM950411"
"GSE38832"t"GSE38832:0000000:036"t"GSM950447"t"GSM950411"
"GSE38832"t"GSE38832:0000000:037"t"GSM950448"t"GSM950411"
"GSE38832"t"GSE38832:0000000:038"t"GSM950449"t"GSM950411"
"GSE38832"t"GSE38832:0000000:039"t"GSM950450"t"GSM950411"
"GSE38832"t"GSE38832:0000000:040"t"GSM950451"t"GSM950411"
"GSE38832"t"GSE38832:0000000:041"t"GSM950452"t"GSM950411"
"GSE38832"t"GSE38832:0000000:042"t"GSM950453"t"GSM950411"
"GSE38832"t"GSE38832:0000000:043"t"GSM950454"t"GSM950411"
"GSE38832"t"GSE38832:0000000:044"t"GSM950455"t"GSM950411"
"GSE38832"t"GSE38832:0000000:045"t"GSM950456"t"GSM950411"
"GSE38832"t"GSE38832:0000000:046"t"GSM950457"t"GSM950411"
"GSE38832"t"GSE38832:0000000:047"t"GSM950458"t"GSM950411"
"GSE38832"t"GSE38832:0000000:048"t"GSM950459"t"GSM950411"
"GSE38832"t"GSE38832:0000000:049"t"GSM950460"t"GSM950411"
"GSE38832"t"GSE38832:0000000:050"t"GSM950461"t"GSM950411"
"GSE38832"t"GSE38832:0000000:051"t"GSM950462"t"GSM950411"
"GSE38832"t"GSE38832:0000000:052"t"GSM950463"t"GSM950411"
"GSE38832"t"GSE38832:0000000:053"t"GSM950464"t"GSM950411"
"GSE38832"t"GSE38832:0000000:054"t"GSM950465"t"GSM950411"
"GSE38832"t"GSE38832:0000000:055"t"GSM950466"t"GSM950411"
"GSE38832"t"GSE38832:0000000:056"t"GSM950467"t"GSM950411"
"GSE38832"t"GSE38832:0000000:057"t"GSM950468"t"GSM950411"
"GSE38832"t"GSE38832:0000000:058"t"GSM950469"t"GSM950411"
"GSE38832"t"GSE38832:0000000:059"t"GSM950470"t"GSM950411"
"GSE38832"t"GSE38832:0000000:060"t"GSM950471"t"GSM950411"
"GSE38832"t"GSE38832:0000000:061"t"GSM950472"t"GSM950411"
"GSE38832"t"GSE38832:0000000:062"t"GSM950473"t"GSM950411"
"GSE38832"t"GSE38832:0000000:063"t"GSM950474"t"GSM950411"
"GSE38832"t"GSE38832:0000000:064"t"GSM950475"t"GSM950411"
"GSE38832"t"GSE38832:0000000:065"t"GSM950476"t"GSM950411"
"GSE38832"t"GSE38832:0000000:066"t"GSM950477"t"GSM950411"
"GSE38832"t"GSE38832:0000000:067"t"GSM950478"t"GSM950411"
"GSE38832"t"GSE38832:0000000:068"t"GSM950479"t"GSM950411"
"GSE38832"t"GSE38832:0000000:069"t"GSM950480"t"GSM950411"
"GSE38832"t"GSE38832:0000000:070"t"GSM950481"t"GSM950411"
"GSE38832"t"GSE38832:0000000:071"t"GSM950482"t"GSM950411"
"GSE38832"t"GSE38832:0000000:072"t"GSM950483"t"GSM950411"
"GSE38832"t"GSE38832:0000000:073"t"GSM950484"t"GSM950411"
"GSE38832"t"GSE38832:0000000:074"t"GSM950485"t"GSM950411"
"GSE38832"t"GSE38832:0000000:075"t"GSM950486"t"GSM950411"
"GSE38832"t"GSE38832:0000000:076"t"GSM950487"t"GSM950411"
"GSE38832"t"GSE38832:0000000:077"t"GSM950488"t"GSM950411"
"GSE38832"t"GSE38832:0000000:078"t"GSM950489"t"GSM950411"
"GSE38832"t"GSE38832:0000000:079"t"GSM950490"t"GSM950411"
"GSE38832"t"GSE38832:0000000:080"t"GSM950491"t"GSM950411"
"GSE38832"t"GSE38832:0000000:081"t"GSM950492"t"GSM950411"
"GSE38832"t"GSE38832:0000000:082"t"GSM950493"t"GSM950411"
"GSE38832"t"GSE38832:0000000:083"t"GSM950494"t"GSM950411"
"GSE38832"t"GSE38832:0000000:084"t"GSM950495"t"GSM950411"
"GSE38832"t"GSE38832:0000000:085"t"GSM950496"t"GSM950411"
"GSE38832"t"GSE38832:0000000:086"t"GSM950497"t"GSM950411"
"GSE38832"t"GSE38832:0000000:087"t"GSM950498"t"GSM950411"
"GSE38832"t"GSE38832:0000000:088"t"GSM950499"t"GSM950411"
"GSE38832"t"GSE38832:0000000:089"t"GSM950500"t"GSM950411"
"GSE38832"t"GSE38832:0000000:090"t"GSM950501"t"GSM950411"
"GSE38832"t"GSE38832:0000000:091"t"GSM950502"t"GSM950411"
"GSE38832"t"GSE38832:0000000:092"t"GSM950503"t"GSM950411"
"GSE38832"t"GSE38832:0000000:093"t"GSM950504"t"GSM950411"
"GSE38832"t"GSE38832:0000000:094"t"GSM950505"t"GSM950411"
"GSE38832"t"GSE38832:0000000:095"t"GSM950506"t"GSM950411"
"GSE38832"t"GSE38832:0000000:096"t"GSM950507"t"GSM950411"
"GSE38832"t"GSE38832:0000000:097"t"GSM950508"t"GSM950411"
"GSE38832"t"GSE38832:0000000:098"t"GSM950509"t"GSM950411"
"GSE38832"t"GSE38832:0000000:099"t"GSM950510"t"GSM950411"
"GSE38832"t"GSE38832:0000000:100"t"GSM950511"t"GSM950411"
"GSE38832"t"GSE38832:0000000:101"t"GSM950512"t"GSM950411"
"GSE38832"t"GSE38832:0000000:102"t"GSM950513"t"GSM950411"
"GSE38832"t"GSE38832:0000000:103"t"GSM950514"t"GSM950411"
"GSE38832"t"GSE38832:0000000:104"t"GSM950515"t"GSM950411"
"GSE38832"t"GSE38832:0000000:105"t"GSM950516"t"GSM950411"
"GSE38832"t"GSE38832:0000000:106"t"GSM950517"t"GSM950411"
"GSE38832"t"GSE38832:0000000:107"t"GSM950518"t"GSM950411"
"GSE38832"t"GSE38832:0000000:108"t"GSM950519"t"GSM950411"
"GSE38832"t"GSE38832:0000000:109"t"GSM950520"t"GSM950411"
"GSE38832"t"GSE38832:0000000:110"t"GSM950521"t"GSM950411"
"GSE38832"t"GSE38832:0000000:111"t"GSM950522"t"GSM950411"
"GSE38832"t"GSE38832:0000000:112"t"GSM950523"t"GSM950411"
"GSE38832"t"GSE38832:0000000:113"t"GSM950524"t"GSM950411"
"GSE38832"t"GSE38832:0000000:114"t"GSM950525"t"GSM950411"
"GSE38832"t"GSE38832:0000000:115"t"GSM950526"t"GSM950411"
"GSE38832"t"GSE38832:0000000:116"t"GSM950527"t"GSM950411"
"GSE38832"t"GSE38832:0000000:117"t"GSM950528"t"GSM950411"
"GSE38832"t"GSE38832:0000000:118"t"GSM950529"t"GSM950411"
"GSE38832"t"GSE38832:0000000:119"t"GSM950530"t"GSM950411"
"GSE38832"t"GSE38832:0000000:120"t"GSM950531"t"GSM950411"
"GSE38832"t"GSE38832:0000000:121"t"GSM950532"t"GSM950411"
"GSE39084"t"GSE39084:0000000:01"t"GSM955441"t"GSM955440"
"GSE39084"t"GSE39084:0000000:02"t"GSM955442"t"GSM955440"
"GSE39084"t"GSE39084:0000000:03"t"GSM955443"t"GSM955440"
"GSE39084"t"GSE39084:0000000:04"t"GSM955444"t"GSM955440"
"GSE39084"t"GSE39084:0000000:05"t"GSM955445"t"GSM955440"
"GSE39084"t"GSE39084:0000000:06"t"GSM955446"t"GSM955440"
"GSE39084"t"GSE39084:0000000:07"t"GSM955447"t"GSM955440"
"GSE39084"t"GSE39084:0000000:08"t"GSM955448"t"GSM955440"
"GSE39084"t"GSE39084:0000000:09"t"GSM955449"t"GSM955440"
"GSE39084"t"GSE39084:0000000:10"t"GSM955450"t"GSM955440"
"GSE39084"t"GSE39084:0000000:11"t"GSM955451"t"GSM955440"
"GSE39084"t"GSE39084:0000000:12"t"GSM955452"t"GSM955440"
"GSE39084"t"GSE39084:0000000:13"t"GSM955453"t"GSM955440"
"GSE39084"t"GSE39084:0000000:14"t"GSM955454"t"GSM955440"
"GSE39084"t"GSE39084:0000000:15"t"GSM955455"t"GSM955440"
"GSE39084"t"GSE39084:0000000:16"t"GSM955456"t"GSM955440"
"GSE39084"t"GSE39084:0000000:17"t"GSM955457"t"GSM955440"
"GSE39084"t"GSE39084:0000000:18"t"GSM955458"t"GSM955440"
"GSE39084"t"GSE39084:0000000:19"t"GSM955459"t"GSM955440"
"GSE39084"t"GSE39084:0000000:20"t"GSM955460"t"GSM955440"
"GSE39084"t"GSE39084:0000000:21"t"GSM955461"t"GSM955440"
"GSE39084"t"GSE39084:0000000:22"t"GSM955462"t"GSM955440"
"GSE39084"t"GSE39084:0000000:23"t"GSM955463"t"GSM955440"
"GSE39084"t"GSE39084:0000000:24"t"GSM955464"t"GSM955440"
"GSE39084"t"GSE39084:0000000:25"t"GSM955465"t"GSM955440"
"GSE39084"t"GSE39084:0000000:26"t"GSM955466"t"GSM955440"
"GSE39084"t"GSE39084:0000000:27"t"GSM955467"t"GSM955440"
"GSE39084"t"GSE39084:0000000:28"t"GSM955468"t"GSM955440"
"GSE39084"t"GSE39084:0000000:29"t"GSM955469"t"GSM955440"
"GSE39084"t"GSE39084:0000000:30"t"GSM955470"t"GSM955440"
"GSE39084"t"GSE39084:0000000:31"t"GSM955471"t"GSM955440"
"GSE39084"t"GSE39084:0000000:32"t"GSM955472"t"GSM955440"
"GSE39084"t"GSE39084:0000000:33"t"GSM955473"t"GSM955440"
"GSE39084"t"GSE39084:0000000:34"t"GSM955474"t"GSM955440"
"GSE39084"t"GSE39084:0000000:35"t"GSM955475"t"GSM955440"
"GSE39084"t"GSE39084:0000000:36"t"GSM955476"t"GSM955440"
"GSE39084"t"GSE39084:0000000:37"t"GSM955477"t"GSM955440"
"GSE39084"t"GSE39084:0000000:38"t"GSM955478"t"GSM955440"
"GSE39084"t"GSE39084:0000000:39"t"GSM955479"t"GSM955440"
"GSE39084"t"GSE39084:0000000:40"t"GSM955480"t"GSM955440"
"GSE39084"t"GSE39084:0000000:41"t"GSM955481"t"GSM955440"
"GSE39084"t"GSE39084:0000000:42"t"GSM955482"t"GSM955440"
"GSE39084"t"GSE39084:0000000:43"t"GSM955483"t"GSM955440"
"GSE39084"t"GSE39084:0000000:44"t"GSM955484"t"GSM955440"
"GSE39084"t"GSE39084:0000000:45"t"GSM955485"t"GSM955440"
"GSE39084"t"GSE39084:0000000:46"t"GSM955486"t"GSM955440"
"GSE39084"t"GSE39084:0000000:47"t"GSM955487"t"GSM955440"
"GSE39084"t"GSE39084:0000000:48"t"GSM955488"t"GSM955440"
"GSE39084"t"GSE39084:0000000:49"t"GSM955489"t"GSM955440"
"GSE39084"t"GSE39084:0000000:50"t"GSM955490"t"GSM955440"
"GSE39084"t"GSE39084:0000000:51"t"GSM955491"t"GSM955440"
"GSE39084"t"GSE39084:0000000:52"t"GSM955492"t"GSM955440"
"GSE39084"t"GSE39084:0000000:53"t"GSM955493"t"GSM955440"
"GSE39084"t"GSE39084:0000000:54"t"GSM955494"t"GSM955440"
"GSE39084"t"GSE39084:0000000:55"t"GSM955495"t"GSM955440"
"GSE39084"t"GSE39084:0000000:56"t"GSM955496"t"GSM955440"
"GSE39084"t"GSE39084:0000000:57"t"GSM955497"t"GSM955440"
"GSE39084"t"GSE39084:0000000:58"t"GSM955498"t"GSM955440"
"GSE39084"t"GSE39084:0000000:59"t"GSM955499"t"GSM955440"
"GSE39084"t"GSE39084:0000000:60"t"GSM955500"t"GSM955440"
"GSE39084"t"GSE39084:0000000:61"t"GSM955501"t"GSM955440"
"GSE39084"t"GSE39084:0000000:62"t"GSM955502"t"GSM955440"
"GSE39084"t"GSE39084:0000000:63"t"GSM955503"t"GSM955440"
"GSE39084"t"GSE39084:0000000:64"t"GSM955504"t"GSM955440"
"GSE39084"t"GSE39084:0000000:65"t"GSM955505"t"GSM955440"
"GSE39084"t"GSE39084:0000000:66"t"GSM955506"t"GSM955440"
"GSE39084"t"GSE39084:0000000:67"t"GSM955507"t"GSM955440"
"GSE39084"t"GSE39084:0000000:68"t"GSM955508"t"GSM955440"
"GSE39084"t"GSE39084:0000000:69"t"GSM955509"t"GSM955440"
"GSE39363"t"GSE39363:0000000:1"t"GSM966601;GSM966602;GSM966603;GSM966605;GSM966606;GSM966607;GSM966608;GSM966609;GSM966611"t"GSM966600;GSM966604;GSM966610;GSM966612"
"GSE40367"t"GSE40367:2:1"t"GSM992302;GSM992304"t"GSM992303;GSM992305"
"GSE40367"t"GSE40367:3:1"t"GSM992306"t"GSM992307;GSM992311"
"GSE40367"t"GSE40367:4:1"t"GSM992272;GSM992274;GSM992276;GSM992278;GSM992281;GSM992283;GSM992285;GSM992308"t"GSM992309"
"GSE40367"t"GSE40367:4:2"t"GSM992273;GSM992275;GSM992277;GSM992279;GSM992282;GSM992284;GSM992286"t"GSM992309"
"GSE40367"t"GSE40367:5:1"t"GSM992312;GSM992314;GSM992316"t"GSM992313;GSM992315;GSM992317"
"GSE40367"t"GSE40367:5:2"t"GSM992280"t"GSM992313;GSM992315;GSM992317"
"GSE40367"t"GSE40367:6:1"t"GSM992310;GSM992319;GSM992321;GSM992323;GSM992324;GSM992325;GSM992326;GSM992327;GSM992328;GSM992329;GSM992330;GSM992331;GSM992332"t"GSM992320;GSM992322"
"GSE40568"t"GSE40568:0000000:1"t"GSM1389608;GSM1389609;GSM1389610;GSM1389611;GSM1389612"t"GSM1389618;GSM1389619;GSM1389620"
"GSE40568"t"GSE40568:0000000:2"t"GSM1389613;GSM1389614;GSM1389615;GSM1389616;GSM1389617"t"GSM1389618;GSM1389619;GSM1389620"
"GSE40595"t"GSE40595:1:1"t"GSM997599;GSM997600;GSM997601;GSM997602;GSM997603;GSM997604;GSM997605;GSM997606;GSM997607;GSM997608;GSM997609;GSM997610;GSM997611;GSM997612;GSM997613;GSM997614;GSM997615;GSM997616;GSM997617;GSM997618;GSM997619;GSM997620;GSM997621;GSM997622;GSM997623;GSM997624;GSM997625;GSM997626;GSM997627;GSM997628;GSM997629"t"GSM997591;GSM997592;GSM997593;GSM997594;GSM997595;GSM997596;GSM997597;GSM997598"
"GSE40595"t"GSE40595:2:1"t"GSM997636;GSM997637;GSM997638;GSM997639;GSM997640;GSM997641;GSM997642;GSM997643;GSM997644;GSM997645;GSM997646;GSM997647;GSM997648;GSM997649;GSM997650;GSM997651;GSM997652;GSM997653;GSM997654;GSM997655;GSM997656;GSM997657;GSM997658;GSM997659;GSM997660;GSM997661;GSM997662;GSM997663;GSM997664;GSM997665;GSM997666;GSM997667"t"GSM997630;GSM997631;GSM997632;GSM997633;GSM997634;GSM997635"
"GSE40643"t"GSE40643:0000000:1"t"GSM998794;GSM998795;GSM998796"t"GSM998791;GSM998792;GSM998793"
"GSE40985"t"GSE40985:0000000:1"t"GSM1006374;GSM1006375"t"GSM1006372;GSM1006373"
"GSE40986"t"GSE40986:0000000:1"t"GSM1006379;GSM1006380;GSM1006381"t"GSM1006376;GSM1006377;GSM1006378"
"GSE41992"t"GSE41992:0000000:1"t"GSM1029661"t"GSM1029660"
"GSE42001"t"GSE42001:0:1"t"GSM1030382"t"GSM1030376"
"GSE42001"t"GSE42001:0:2"t"GSM1030388"t"GSM1030376"
"GSE42001"t"GSE42001:0:3"t"GSM1030394"t"GSM1030376"
"GSE42001"t"GSE42001:1:1"t"GSM1030383"t"GSM1030377"
"GSE42001"t"GSE42001:1:2"t"GSM1030389"t"GSM1030377"
"GSE42001"t"GSE42001:1:3"t"GSM1030395"t"GSM1030377"
"GSE42001"t"GSE42001:2:1"t"GSM1030384"t"GSM1030378"
"GSE42001"t"GSE42001:2:2"t"GSM1030390"t"GSM1030378"
"GSE42001"t"GSE42001:2:3"t"GSM1030396"t"GSM1030378"
"GSE42001"t"GSE42001:3:1"t"GSM1030385"t"GSM1030379"
"GSE42001"t"GSE42001:3:2"t"GSM1030391"t"GSM1030379"
"GSE42001"t"GSE42001:3:3"t"GSM1030397"t"GSM1030379"
"GSE42001"t"GSE42001:4:1"t"GSM1030386"t"GSM1030380"
"GSE42001"t"GSE42001:4:2"t"GSM1030392"t"GSM1030380"
"GSE42001"t"GSE42001:4:3"t"GSM1030398"t"GSM1030380"
"GSE42001"t"GSE42001:5:1"t"GSM1030387"t"GSM1030381"
"GSE42001"t"GSE42001:5:2"t"GSM1030393"t"GSM1030381"
"GSE42001"t"GSE42001:5:3"t"GSM1030399"t"GSM1030381"
"GSE42038"t"GSE42038:0000000:01"t"GSM1030963"t"GSM1030962"
"GSE42038"t"GSE42038:0000000:02"t"GSM1030964"t"GSM1030962"
"GSE42038"t"GSE42038:0000000:03"t"GSM1030965"t"GSM1030962"
"GSE42038"t"GSE42038:0000000:04"t"GSM1030966"t"GSM1030962"
"GSE42038"t"GSE42038:0000000:05"t"GSM1030967"t"GSM1030962"
"GSE42038"t"GSE42038:0000000:06"t"GSM1030968"t"GSM1030962"
"GSE42038"t"GSE42038:0000000:07"t"GSM1030969"t"GSM1030962"
"GSE42038"t"GSE42038:0000000:08"t"GSM1030970"t"GSM1030962"
"GSE42038"t"GSE42038:0000000:09"t"GSM1030971"t"GSM1030962"
"GSE42038"t"GSE42038:0000000:10"t"GSM1030972"t"GSM1030962"
"GSE42038"t"GSE42038:0000000:11"t"GSM1030973"t"GSM1030962"
"GSE42038"t"GSE42038:0000000:12"t"GSM1030974"t"GSM1030962"
"GSE42038"t"GSE42038:0000000:13"t"GSM1030975"t"GSM1030962"
"GSE42038"t"GSE42038:0000000:14"t"GSM1030976"t"GSM1030962"
"GSE42038"t"GSE42038:0000000:15"t"GSM1030977"t"GSM1030962"
"GSE42038"t"GSE42038:0000000:16"t"GSM1030978"t"GSM1030962"
"GSE42038"t"GSE42038:0000000:17"t"GSM1030979"t"GSM1030962"
"GSE42038"t"GSE42038:0000000:18"t"GSM1030980"t"GSM1030962"
"GSE42038"t"GSE42038:0000000:19"t"GSM1030981"t"GSM1030962"
"GSE42038"t"GSE42038:0000000:20"t"GSM1030982"t"GSM1030962"
"GSE42038"t"GSE42038:0000000:21"t"GSM1030983"t"GSM1030962"
"GSE42038"t"GSE42038:0000000:22"t"GSM1030984"t"GSM1030962"
"GSE42038"t"GSE42038:0000000:23"t"GSM1030985"t"GSM1030962"
"GSE42038"t"GSE42038:0000000:24"t"GSM1030986"t"GSM1030962"
"GSE42038"t"GSE42038:0000000:25"t"GSM1030987"t"GSM1030962"
"GSE42038"t"GSE42038:0000000:26"t"GSM1030988"t"GSM1030962"
"GSE42038"t"GSE42038:0000000:27"t"GSM1030989"t"GSM1030962"
"GSE42038"t"GSE42038:0000000:28"t"GSM1030990"t"GSM1030962"
"GSE42038"t"GSE42038:0000000:29"t"GSM1030991"t"GSM1030962"
"GSE42038"t"GSE42038:0000000:30"t"GSM1030992"t"GSM1030962"
"GSE42038"t"GSE42038:0000000:31"t"GSM1030993"t"GSM1030962"
"GSE42038"t"GSE42038:0000000:32"t"GSM1030994"t"GSM1030962"
"GSE42038"t"GSE42038:0000000:33"t"GSM1030995"t"GSM1030962"
"GSE42038"t"GSE42038:0000000:34"t"GSM1030996"t"GSM1030962"
"GSE42038"t"GSE42038:0000000:35"t"GSM1030997"t"GSM1030962"
"GSE42038"t"GSE42038:0000000:36"t"GSM1030998"t"GSM1030962"
"GSE42038"t"GSE42038:0000000:37"t"GSM1030999"t"GSM1030962"
"GSE42038"t"GSE42038:0000000:38"t"GSM1031000"t"GSM1030962"
"GSE42038"t"GSE42038:0000000:39"t"GSM1031001"t"GSM1030962"
"GSE42038"t"GSE42038:0000000:40"t"GSM1031002"t"GSM1030962"
"GSE42038"t"GSE42038:0000000:41"t"GSM1031003"t"GSM1030962"
"GSE42038"t"GSE42038:0000000:42"t"GSM1031004"t"GSM1030962"
"GSE42038"t"GSE42038:0000000:43"t"GSM1031005"t"GSM1030962"
"GSE42038"t"GSE42038:0000000:44"t"GSM1031006"t"GSM1030962"
"GSE42038"t"GSE42038:0000000:45"t"GSM1031007"t"GSM1030962"
"GSE42038"t"GSE42038:0000000:46"t"GSM1031008"t"GSM1030962"
"GSE42038"t"GSE42038:0000000:47"t"GSM1031009"t"GSM1030962"
"GSE42038"t"GSE42038:0000000:48"t"GSM1031010"t"GSM1030962"
"GSE42038"t"GSE42038:0000000:49"t"GSM1031011"t"GSM1030962"
"GSE42038"t"GSE42038:0000000:50"t"GSM1031012"t"GSM1030962"
"GSE42038"t"GSE42038:0000000:51"t"GSM1031013"t"GSM1030962"
"GSE42038"t"GSE42038:0000000:52"t"GSM1031014"t"GSM1030962"
"GSE42038"t"GSE42038:0000000:53"t"GSM1031015"t"GSM1030962"
"GSE42038"t"GSE42038:0000000:54"t"GSM1031016"t"GSM1030962"
"GSE42038"t"GSE42038:0000000:55"t"GSM1031017"t"GSM1030962"
"GSE42038"t"GSE42038:0000000:56"t"GSM1031018"t"GSM1030962"
"GSE42038"t"GSE42038:0000000:57"t"GSM1031019"t"GSM1030962"
"GSE42038"t"GSE42038:0000000:58"t"GSM1031020"t"GSM1030962"
"GSE42038"t"GSE42038:0000000:59"t"GSM1031021"t"GSM1030962"
"GSE42038"t"GSE42038:0000000:60"t"GSM1031022"t"GSM1030962"
"GSE42038"t"GSE42038:0000000:61"t"GSM1031023"t"GSM1030962"
"GSE42038"t"GSE42038:0000000:62"t"GSM1031024"t"GSM1030962"
"GSE42038"t"GSE42038:0000000:63"t"GSM1031025"t"GSM1030962"
"GSE42038"t"GSE42038:0000000:64"t"GSM1031026"t"GSM1030962"
"GSE42038"t"GSE42038:0000000:65"t"GSM1031027"t"GSM1030962"
"GSE42038"t"GSE42038:0000000:66"t"GSM1031028"t"GSM1030962"
"GSE42038"t"GSE42038:0000000:67"t"GSM1031029"t"GSM1030962"
"GSE42038"t"GSE42038:0000000:68"t"GSM1031030"t"GSM1030962"
"GSE42038"t"GSE42038:0000000:69"t"GSM1031031"t"GSM1030962"
"GSE42038"t"GSE42038:0000000:70"t"GSM1031032"t"GSM1030962"
"GSE42038"t"GSE42038:0000000:71"t"GSM1031033"t"GSM1030962"
"GSE42038"t"GSE42038:0000000:72"t"GSM1031034"t"GSM1030962"
"GSE42038"t"GSE42038:0000000:73"t"GSM1031035"t"GSM1030962"
"GSE42038"t"GSE42038:0000000:74"t"GSM1031036"t"GSM1030962"
"GSE42038"t"GSE42038:0000000:75"t"GSM1031037"t"GSM1030962"
"GSE42038"t"GSE42038:0000000:76"t"GSM1031038"t"GSM1030962"
"GSE42038"t"GSE42038:0000000:77"t"GSM1031039"t"GSM1030962"
"GSE42038"t"GSE42038:0000000:78"t"GSM1031040"t"GSM1030962"
"GSE42252"t"GSE42252:0000000:1"t"GSM1036299;GSM1036300;GSM1036301;GSM1036302;GSM1036303"t"GSM1036304"
"GSE42404"t"GSE42404:01:1"t"GSM1039222;GSM1039240"t"GSM1039221;GSM1039239"
"GSE42404"t"GSE42404:02:1"t"GSM1039224"t"GSM1039223"
"GSE42404"t"GSE42404:03:1"t"GSM1039225"t"GSM1039226"
"GSE42404"t"GSE42404:04:1"t"GSM1039228"t"GSM1039227"
"GSE42404"t"GSE42404:05:1"t"GSM1039230"t"GSM1039229"
"GSE42404"t"GSE42404:06:1"t"GSM1039231"t"GSM1039232"
"GSE42404"t"GSE42404:07:1"t"GSM1039234"t"GSM1039233"
"GSE42404"t"GSE42404:08:1"t"GSM1039236"t"GSM1039235"
"GSE42404"t"GSE42404:09:1"t"GSM1039237"t"GSM1039238"
"GSE42404"t"GSE42404:11:1"t"GSM1039241"t"GSM1039242"
"GSE42697"t"GSE42697:0000000:01"t"GSM1048089"t"GSM1048088"
"GSE42697"t"GSE42697:0000000:02"t"GSM1048090"t"GSM1048088"
"GSE42697"t"GSE42697:0000000:03"t"GSM1048091"t"GSM1048088"
"GSE42697"t"GSE42697:0000000:04"t"GSM1048092"t"GSM1048088"
"GSE42697"t"GSE42697:0000000:05"t"GSM1048093"t"GSM1048088"
"GSE42697"t"GSE42697:0000000:06"t"GSM1048094"t"GSM1048088"
"GSE42697"t"GSE42697:0000000:07"t"GSM1048095"t"GSM1048088"
"GSE42697"t"GSE42697:0000000:08"t"GSM1048096"t"GSM1048088"
"GSE42697"t"GSE42697:0000000:09"t"GSM1048097"t"GSM1048088"
"GSE42697"t"GSE42697:0000000:10"t"GSM1048098"t"GSM1048088"
"GSE42697"t"GSE42697:0000000:11"t"GSM1048099"t"GSM1048088"
"GSE42806"t"GSE42806:1:1"t"GSM1050265"t"GSM1050270"
"GSE42806"t"GSE42806:2:1"t"GSM1050260;GSM1050263"t"GSM1050271;GSM1050273"
"GSE42806"t"GSE42806:3:1"t"GSM1050262;GSM1050266"t"GSM1050272"
"GSE42806"t"GSE42806:4:1"t"GSM1050264"t"GSM1050274"
"GSE43358"t"GSE43358:0000000:1"t"GSM1060923;GSM1060924;GSM1060925;GSM1060926;GSM1060927;GSM1060928;GSM1060929;GSM1060930;GSM1060931;GSM1060932;GSM1060933;GSM1060934;GSM1060936;GSM1060937;GSM1060938;GSM1060939"t"GSM1060909;GSM1060910;GSM1060911;GSM1060912;GSM1060913;GSM1060914;GSM1060915;GSM1060916;GSM1060917;GSM1060918;GSM1060919;GSM1060920;GSM1060921;GSM1060922"
"GSE43358"t"GSE43358:0000000:2"t"GSM1060940;GSM1060941;GSM1060942;GSM1060943;GSM1060944;GSM1060945;GSM1060946;GSM1060947;GSM1060948;GSM1060949"t"GSM1060909;GSM1060910;GSM1060911;GSM1060912;GSM1060913;GSM1060914;GSM1060915;GSM1060916;GSM1060917;GSM1060918;GSM1060919;GSM1060920;GSM1060921;GSM1060922"
"GSE43358"t"GSE43358:0000000:3"t"GSM1060950;GSM1060951;GSM1060952;GSM1060953;GSM1060954;GSM1060955;GSM1060956;GSM1060957;GSM1060958;GSM1060959;GSM1060960;GSM1060961;GSM1060962;GSM1060963;GSM1060964;GSM1060965;GSM1060966"t"GSM1060909;GSM1060910;GSM1060911;GSM1060912;GSM1060913;GSM1060914;GSM1060915;GSM1060916;GSM1060917;GSM1060918;GSM1060919;GSM1060920;GSM1060921;GSM1060922"
"GSE43437"t"GSE43437:0000000:1"t"GSM1062406;GSM1062407;GSM1062408;GSM1062409;GSM1062410"t"GSM1062402;GSM1062403;GSM1062404;GSM1062405"
"GSE43576"t"GSE43576:0000000:1"t"GSM1065683"t"GSM1065682"
"GSE43576"t"GSE43576:0000000:2"t"GSM1065684"t"GSM1065682"
"GSE43596"t"GSE43596:1:1"t"GSM1066050;GSM1066051;GSM1066052"t"GSM1066056;GSM1066057;GSM1066058"
"GSE43596"t"GSE43596:1:2"t"GSM1066053;GSM1066054;GSM1066055"t"GSM1066056;GSM1066057;GSM1066058"
"GSE43596"t"GSE43596:1:3"t"GSM1066059;GSM1066060;GSM1066061"t"GSM1066056;GSM1066057;GSM1066058"
"GSE43596"t"GSE43596:2:1"t"GSM1066062;GSM1066063;GSM1066064"t"GSM1066068;GSM1066069;GSM1066070"
"GSE43596"t"GSE43596:2:2"t"GSM1066065;GSM1066066;GSM1066067"t"GSM1066068;GSM1066069;GSM1066070"
"GSE43596"t"GSE43596:2:3"t"GSM1066071;GSM1066072;GSM1066073"t"GSM1066068;GSM1066069;GSM1066070"
"GSE43939"t"GSE43939:0:1"t"GSM631340;GSM631341;GSM631342;GSM631343;GSM631344;GSM631345;GSM631346;GSM631347;GSM631348;GSM631349;GSM631350;GSM631351;GSM631352;GSM631353;GSM631354;GSM631355;GSM631356;GSM631357;GSM631358;GSM631359;GSM631360"t"GSM1056120;GSM1056121;GSM1056123;GSM1056124;GSM1056125;GSM1056126;GSM1056127;GSM1056128;GSM1056129;GSM1056131;GSM1056133;GSM1056134;GSM1056141;GSM1056145;GSM1056151;GSM1074719;GSM1074720;GSM1074724;GSM1074725;GSM1074729;GSM1074731;GSM1074737;GSM1074738;GSM1074742;GSM1074744;GSM1074747;GSM1074748;GSM1074749"
"GSE43939"t"GSE43939:1:1"t"GSM631361;GSM631362;GSM631363;GSM631364;GSM631365;GSM631366;GSM631367;GSM631368;GSM631369;GSM631370;GSM631371;GSM631372;GSM631373;GSM631374;GSM631375;GSM631376;GSM631377;GSM631378;GSM631379;GSM631380;GSM631381;GSM631382;GSM631383;GSM631384;GSM631385;GSM631386;GSM631387;GSM631388;GSM631389;GSM631390;GSM631391"t"GSM1056122;GSM1056130;GSM1056132;GSM1056135;GSM1056136;GSM1056137;GSM1056138;GSM1056139;GSM1056140;GSM1056142;GSM1056143;GSM1056144;GSM1056146;GSM1056147;GSM1056148;GSM1056149;GSM1056150;GSM1056153;GSM1074715;GSM1074716;GSM1074717;GSM1074718;GSM1074721;GSM1074722;GSM1074723;GSM1074726;GSM1074727;GSM1074728;GSM1074730;GSM1074732;GSM1074733;GSM1074734;GSM1074735;GSM1074736;GSM1074739;GSM1074740;GSM1074741;GSM1074743;GSM1074745;GSM1074746;GSM1074750;GSM1074751;GSM1074752;GSM1074753;GSM1074754;GSM1074755;GSM1074756;GSM1074757;GSM1074758;GSM1074759;GSM1074760;GSM1074761;GSM1074762;GSM1074763;GSM1074764;GSM1074765;GSM1074766;GSM1074767;GSM1074768;GSM1074769;GSM1074770;GSM1074771;GSM1074772;GSM1074773;GSM1074774;GSM1074775;GSM1074776;GSM1074777;GSM1074778"
"GSE44540"t"GSE44540:0000000:1"t"GSM1086206;GSM1086207;GSM1086208"t"GSM1086203;GSM1086204;GSM1086205"
"GSE44596"t"GSE44596:0000000:1"t"GSM1087598;GSM1087599;GSM1087600"t"GSM1087601;GSM1087602;GSM1087603"
"GSE44597"t"GSE44597:0000000:1"t"GSM1087604;GSM1087605"t"GSM1087606;GSM1087607"
"GSE45267"t"GSE45267:0:1"t"GSM1100425;GSM1100426;GSM1100427;GSM1100428;GSM1100429;GSM1100430;GSM1100448;GSM1100449;GSM1100450;GSM1100451;GSM1100452;GSM1100453;GSM1100454;GSM1100455;GSM1100456"t"GSM1100431;GSM1100432;GSM1100433;GSM1100434;GSM1100435;GSM1100436;GSM1100437;GSM1100438;GSM1100439;GSM1100440;GSM1100441;GSM1100442;GSM1100443;GSM1100444;GSM1100445;GSM1100446;GSM1100447"
"GSE45267"t"GSE45267:1:1"t"GSM1100370;GSM1100371;GSM1100372;GSM1100373;GSM1100374;GSM1100375;GSM1100376;GSM1100377;GSM1100378;GSM1100379;GSM1100380;GSM1100381;GSM1100406;GSM1100407;GSM1100408;GSM1100409;GSM1100410;GSM1100411;GSM1100412;GSM1100413;GSM1100414;GSM1100415;GSM1100416;GSM1100417;GSM1100418;GSM1100419;GSM1100420;GSM1100421;GSM1100422;GSM1100423;GSM1100424"t"GSM1100382;GSM1100383;GSM1100384;GSM1100385;GSM1100386;GSM1100387;GSM1100388;GSM1100389;GSM1100390;GSM1100391;GSM1100392;GSM1100393;GSM1100394;GSM1100395;GSM1100396;GSM1100397;GSM1100398;GSM1100399;GSM1100400;GSM1100401;GSM1100402;GSM1100403;GSM1100404;GSM1100405"
"GSE45435"t"GSE45435:0000000:1"t"GSM1104179;GSM1104180;GSM1104181;GSM1104182;GSM1104183;GSM1104184;GSM1104185;GSM1104186;GSM1104187;GSM1104188;GSM1104189;GSM1104190;GSM1104191;GSM1104192;GSM1104193;GSM1104194;GSM1104195;GSM1104196;GSM1104197;GSM1104198;GSM1104199"t"GSM1104169;GSM1104170;GSM1104173;GSM1104178"
"GSE45435"t"GSE45435:0000000:2"t"GSM1104171;GSM1104172;GSM1104174;GSM1104175;GSM1104176;GSM1104177"t"GSM1104169;GSM1104170;GSM1104173;GSM1104178"
"GSE45512"t"GSE45512:0000000:1"t"GSM1105869;GSM1105870;GSM1105871;GSM1105872;GSM1105873"t"GSM1105874;GSM1105875;GSM1105876;GSM1105877;GSM1105878"
"GSE45627"t"GSE45627:0000000:1"t"GSM1110879;GSM1110880"t"GSM1110881;GSM1110882"
"GSE45636"t"GSE45636:0000000:1"t"GSM1111160;GSM1111162;GSM1111164"t"GSM1111159;GSM1111161;GSM1111163"
"GSE45670"t"GSE45670:0000000:1"t"GSM1111672;GSM1111673;GSM1111674;GSM1111675;GSM1111676;GSM1111677;GSM1111678;GSM1111679;GSM1111680;GSM1111681;GSM1111682;GSM1111683;GSM1111684;GSM1111685;GSM1111686;GSM1111687;GSM1111688"t"GSM1111662;GSM1111663;GSM1111664;GSM1111665;GSM1111666;GSM1111667;GSM1111668;GSM1111669;GSM1111670;GSM1111671"
"GSE45670"t"GSE45670:0000000:2"t"GSM1111689;GSM1111690;GSM1111691;GSM1111692;GSM1111693;GSM1111694;GSM1111695;GSM1111696;GSM1111697;GSM1111698;GSM1111699"t"GSM1111662;GSM1111663;GSM1111664;GSM1111665;GSM1111666;GSM1111667;GSM1111668;GSM1111669;GSM1111670;GSM1111671"
"GSE45736"t"GSE45736:1:1"t"GSM1113424"t"GSM1113422"
"GSE46024"t"GSE46024:0000000:1"t"GSM1122065"t"GSM1122064"
"GSE46474"t"GSE46474:0000000:1"t"GSM1130812;GSM1130814;GSM1130816;GSM1130818;GSM1130820;GSM1130822;GSM1130824;GSM1130826;GSM1130828;GSM1130830;GSM1130832;GSM1130834;GSM1130836;GSM1130838;GSM1130840;GSM1130842;GSM1130844;GSM1130846;GSM1130848;GSM1130850"t"GSM1130813;GSM1130815;GSM1130817;GSM1130819;GSM1130821;GSM1130823;GSM1130825;GSM1130827;GSM1130829;GSM1130831;GSM1130833;GSM1130835;GSM1130837;GSM1130839;GSM1130841;GSM1130843;GSM1130845;GSM1130847;GSM1130849;GSM1130851"
"GSE46519"t"GSE46519:0000000:1"t"GSM1131701;GSM1131702;GSM1131703"t"GSM1131699;GSM1131700"
"GSE46580"t"GSE46580:0000000:1"t"GSM1132852;GSM1132853"t"GSM1132854;GSM1132855"
"GSE46687"t"GSE46687:0000000:1"t"GSM1134026;GSM1134027;GSM1134028;GSM1134029;GSM1134030;GSM1134031;GSM1134032;GSM1134033;GSM1134034;GSM1134035;GSM1134036;GSM1134037;GSM1134038;GSM1134039;GSM1134040;GSM1134041"t"GSM1134016;GSM1134017;GSM1134018;GSM1134019;GSM1134020;GSM1134021;GSM1134022;GSM1134023;GSM1134024;GSM1134025"
"GSE46687"t"GSE46687:0000000:2"t"GSM1134042;GSM1134043;GSM1134044;GSM1134045;GSM1134046;GSM1134047;GSM1134048;GSM1134049;GSM1134050;GSM1134051"t"GSM1134016;GSM1134017;GSM1134018;GSM1134019;GSM1134020;GSM1134021;GSM1134022;GSM1134023;GSM1134024;GSM1134025"
"GSE46708"t"GSE46708:0000000:1"t"GSM1135059;GSM1135060;GSM1135061;GSM1135062;GSM1135063"t"GSM1135054;GSM1135055;GSM1135056;GSM1135057;GSM1135058"
"GSE46819"t"GSE46819:0:1"t"GSM1138796;GSM1138797;GSM1138798;GSM1138799;GSM1138803;GSM1138804"t"GSM1138793;GSM1138794;GSM1138795;GSM1138800;GSM1138801;GSM1138802"
"GSE46819"t"GSE46819:1:1"t"GSM1138811"t"GSM1138812"
"GSE46819"t"GSE46819:2:1"t"GSM1138813"t"GSM1138814"
"GSE46819"t"GSE46819:3:1"t"GSM1138815"t"GSM1138816"
"GSE46819"t"GSE46819:4:1"t"GSM1138805"t"GSM1138806"
"GSE46819"t"GSE46819:5:1"t"GSM1138807"t"GSM1138808"
"GSE46819"t"GSE46819:6:1"t"GSM1138809"t"GSM1138810"
"GSE46848"t"GSE46848:0000000:1"t"GSM1139133;GSM1139134"t"GSM1139123;GSM1139124"
"GSE46848"t"GSE46848:0000000:2"t"GSM1139137;GSM1139138"t"GSM1139123;GSM1139124"
"GSE47378"t"GSE47378:0000000:1"t"GSM1148315;GSM1148316;GSM1148317"t"GSM1148312;GSM1148313;GSM1148314"
"GSE47563"t"GSE47563:0000000:1"t"GSM1152505"t"GSM1152504"
"GSE47664"t"GSE47664:0000000:1"t"GSM1154244;GSM1154245;GSM1154246"t"GSM1154247;GSM1154248;GSM1154249"
"GSE47751"t"GSE47751:1:1"t"GSM1155752"t"GSM1155751"
"GSE47751"t"GSE47751:1:2"t"GSM1155753"t"GSM1155751"
"GSE47751"t"GSE47751:1:3"t"GSM1155754"t"GSM1155751"
"GSE47751"t"GSE47751:1:4"t"GSM1155755"t"GSM1155751"
"GSE47751"t"GSE47751:2:1"t"GSM1155757"t"GSM1155756"
"GSE47751"t"GSE47751:2:2"t"GSM1155758"t"GSM1155756"
"GSE47751"t"GSE47751:2:3"t"GSM1155759"t"GSM1155756"
"GSE47751"t"GSE47751:2:4"t"GSM1155760"t"GSM1155756"
"GSE47751"t"GSE47751:2:5"t"GSM1155761"t"GSM1155756"
"GSE47751"t"GSE47751:3:1"t"GSM1155763"t"GSM1155762"
"GSE47751"t"GSE47751:3:2"t"GSM1155764"t"GSM1155762"
"GSE47751"t"GSE47751:3:3"t"GSM1155765"t"GSM1155762"
"GSE47751"t"GSE47751:3:4"t"GSM1155766"t"GSM1155762"
"GSE47751"t"GSE47751:3:5"t"GSM1155767"t"GSM1155762"
"GSE47751"t"GSE47751:4:1"t"GSM1155769"t"GSM1155768"
"GSE47751"t"GSE47751:4:2"t"GSM1155770"t"GSM1155768"
"GSE47751"t"GSE47751:4:3"t"GSM1155771"t"GSM1155768"
"GSE47751"t"GSE47751:4:4"t"GSM1155772"t"GSM1155768"
"GSE47751"t"GSE47751:4:5"t"GSM1155773"t"GSM1155768"
"GSE47751"t"GSE47751:5:1"t"GSM1155775"t"GSM1155774"
"GSE47751"t"GSE47751:5:2"t"GSM1155776"t"GSM1155774"
"GSE47751"t"GSE47751:5:4"t"GSM1155777"t"GSM1155774"
"GSE47751"t"GSE47751:5:5"t"GSM1155778"t"GSM1155774"
"GSE47751"t"GSE47751:6:1"t"GSM1155780"t"GSM1155779"
"GSE47751"t"GSE47751:6:2"t"GSM1155781"t"GSM1155779"
"GSE47751"t"GSE47751:6:3"t"GSM1155782"t"GSM1155779"
"GSE47751"t"GSE47751:6:4"t"GSM1155783"t"GSM1155779"
"GSE47751"t"GSE47751:6:5"t"GSM1155784"t"GSM1155779"
"GSE47908"t"GSE47908:0000000:1"t"GSM1162242;GSM1162243;GSM1162244;GSM1162245;GSM1162246;GSM1162247"t"GSM1162227;GSM1162228;GSM1162229;GSM1162230;GSM1162231;GSM1162232;GSM1162233;GSM1162234;GSM1162235;GSM1162236;GSM1162237;GSM1162238;GSM1162239;GSM1162240;GSM1162241"
"GSE47908"t"GSE47908:0000000:2"t"GSM1162248;GSM1162249;GSM1162250;GSM1162251;GSM1162252;GSM1162253;GSM1162254;GSM1162255;GSM1162256;GSM1162257;GSM1162258;GSM1162259;GSM1162260;GSM1162261;GSM1162262;GSM1162263;GSM1162264;GSM1162265;GSM1162266;GSM1162267"t"GSM1162227;GSM1162228;GSM1162229;GSM1162230;GSM1162231;GSM1162232;GSM1162233;GSM1162234;GSM1162235;GSM1162236;GSM1162237;GSM1162238;GSM1162239;GSM1162240;GSM1162241"
"GSE47908"t"GSE47908:0000000:3"t"GSM1162268;GSM1162269;GSM1162270;GSM1162271;GSM1162272;GSM1162273;GSM1162274;GSM1162275;GSM1162276;GSM1162277;GSM1162278;GSM1162279;GSM1162280;GSM1162281;GSM1162282;GSM1162283;GSM1162284;GSM1162285;GSM1162286"t"GSM1162227;GSM1162228;GSM1162229;GSM1162230;GSM1162231;GSM1162232;GSM1162233;GSM1162234;GSM1162235;GSM1162236;GSM1162237;GSM1162238;GSM1162239;GSM1162240;GSM1162241"
"GSE47929"t"GSE47929:1:1"t"GSM1162580"t"GSM1162579"
"GSE47929"t"GSE47929:2:1"t"GSM1162582"t"GSM1162581"
"GSE47970"t"GSE47970:1:1"t"GSM1163916;GSM1163922;GSM1163928"t"GSM1163915;GSM1163921;GSM1163927"
"GSE47970"t"GSE47970:1:2"t"GSM1163917;GSM1163923;GSM1163929"t"GSM1163915;GSM1163921;GSM1163927"
"GSE47970"t"GSE47970:2:1"t"GSM1163919;GSM1163925;GSM1163931"t"GSM1163918;GSM1163924;GSM1163930"
"GSE47970"t"GSE47970:2:2"t"GSM1163920;GSM1163926;GSM1163932"t"GSM1163918;GSM1163924;GSM1163930"
"GSE48060"t"GSE48060:0000000:1"t"GSM1167073;GSM1167074;GSM1167075;GSM1167076;GSM1167077;GSM1167079;GSM1167080;GSM1167082;GSM1167083;GSM1167084;GSM1167085;GSM1167086;GSM1167087;GSM1167089;GSM1167090;GSM1167091;GSM1167092;GSM1167093;GSM1167094;GSM1167095;GSM1167096;GSM1167098;GSM1167099;GSM1167100;GSM1167101;GSM1167122"t"GSM1167102;GSM1167103;GSM1167104;GSM1167105;GSM1167106;GSM1167107;GSM1167108;GSM1167109;GSM1167110;GSM1167111;GSM1167112;GSM1167113;GSM1167114;GSM1167115;GSM1167116;GSM1167117;GSM1167118;GSM1167119;GSM1167120;GSM1167121;GSM1167123"
"GSE48060"t"GSE48060:0000000:2"t"GSM1167072;GSM1167078;GSM1167081;GSM1167088;GSM1167097"t"GSM1167102;GSM1167103;GSM1167104;GSM1167105;GSM1167106;GSM1167107;GSM1167108;GSM1167109;GSM1167110;GSM1167111;GSM1167112;GSM1167113;GSM1167114;GSM1167115;GSM1167116;GSM1167117;GSM1167118;GSM1167119;GSM1167120;GSM1167121;GSM1167123"
"GSE48101"t"GSE48101:0000000:1"t"GSM1168498;GSM1168499;GSM1168500"t"GSM1168504;GSM1168505;GSM1168506"
"GSE48101"t"GSE48101:0000000:2"t"GSM1168501;GSM1168502;GSM1168503"t"GSM1168504;GSM1168505;GSM1168506"
"GSE48150"t"GSE48150:0000000:1"t"GSM1170016;GSM1170017;GSM1170018"t"GSM1170013;GSM1170014;GSM1170015"
"GSE48150"t"GSE48150:0000000:2"t"GSM1170019;GSM1170020;GSM1170021"t"GSM1170013;GSM1170014;GSM1170015"
"GSE48150"t"GSE48150:0000000:3"t"GSM1170022;GSM1170023;GSM1170024"t"GSM1170013;GSM1170014;GSM1170015"
"GSE48350"t"GSE48350:01:2"t"GSM300166"t"GSM300185"
"GSE48350"t"GSE48350:01:3"t"GSM300167"t"GSM300185"
"GSE48350"t"GSE48350:02:1"t"GSM300168;GSM300215"t"GSM300214"
"GSE48350"t"GSE48350:02:2"t"GSM300216"t"GSM300214"
"GSE48350"t"GSE48350:02:3"t"GSM300217"t"GSM300214"
"GSE48350"t"GSE48350:03:2"t"GSM300246"t"GSM300169"
"GSE48350"t"GSE48350:03:3"t"GSM300247"t"GSM300169"
"GSE48350"t"GSE48350:04:1"t"GSM300170;GSM300272"t"GSM300271"
"GSE48350"t"GSE48350:04:2"t"GSM300273"t"GSM300271"
"GSE48350"t"GSE48350:04:3"t"GSM300274"t"GSM300271"
"GSE48350"t"GSE48350:05:1"t"GSM300171;GSM300309"t"GSM300308"
"GSE48350"t"GSE48350:05:2"t"GSM300310"t"GSM300308"
"GSE48350"t"GSE48350:05:3"t"GSM300311"t"GSM300308"
"GSE48350"t"GSE48350:06:1"t"GSM300172;GSM1176213"t"GSM1176196"
"GSE48350"t"GSE48350:06:2"t"GSM1176232"t"GSM1176196"
"GSE48350"t"GSE48350:06:3"t"GSM1176256"t"GSM1176196"
"GSE48350"t"GSE48350:07:1"t"GSM300174"t"GSM300173;GSM1176201"
"GSE48350"t"GSE48350:07:2"t"GSM300175;GSM1176240"t"GSM300173;GSM1176201"
"GSE48350"t"GSE48350:07:3"t"GSM300176;GSM1176264"t"GSM300173;GSM1176201"
"GSE48350"t"GSE48350:08:1"t"GSM300178"t"GSM300177;GSM1176206"
"GSE48350"t"GSE48350:08:2"t"GSM300179;GSM1176249"t"GSM300177;GSM1176206"
"GSE48350"t"GSE48350:08:3"t"GSM300180;GSM1176271"t"GSM300177;GSM1176206"
"GSE48350"t"GSE48350:09:1"t"GSM300182"t"GSM300181"
"GSE48350"t"GSE48350:09:2"t"GSM300183"t"GSM300181"
"GSE48350"t"GSE48350:09:3"t"GSM350078"t"GSM300181"
"GSE48350"t"GSE48350:11:1"t"GSM300187"t"GSM300186"
"GSE48350"t"GSE48350:11:3"t"GSM300188"t"GSM300186"
"GSE48350"t"GSE48350:12:1"t"GSM300190"t"GSM300189"
"GSE48350"t"GSE48350:12:3"t"GSM300191"t"GSM300189"
"GSE48350"t"GSE48350:13:1"t"GSM300193"t"GSM300192"
"GSE48350"t"GSE48350:13:2"t"GSM300194"t"GSM300192"
"GSE48350"t"GSE48350:13:3"t"GSM300195"t"GSM300192"
"GSE48350"t"GSE48350:14:1"t"GSM300197"t"GSM300196"
"GSE48350"t"GSE48350:14:2"t"GSM300198"t"GSM300196"
"GSE48350"t"GSE48350:14:3"t"GSM300199"t"GSM300196"
"GSE48350"t"GSE48350:15:3"t"GSM300201"t"GSM300200"
"GSE48350"t"GSE48350:16:3"t"GSM300203"t"GSM300202"
"GSE48350"t"GSE48350:17:1"t"GSM300205"t"GSM300204"
"GSE48350"t"GSE48350:17:2"t"GSM300206"t"GSM300204"
"GSE48350"t"GSE48350:17:3"t"GSM300207"t"GSM300204"
"GSE48350"t"GSE48350:18:1"t"GSM300209"t"GSM300208"
"GSE48350"t"GSE48350:18:2"t"GSM300210"t"GSM300208"
"GSE48350"t"GSE48350:18:3"t"GSM300211"t"GSM300208"
"GSE48350"t"GSE48350:19:3"t"GSM300213"t"GSM300212"
"GSE48350"t"GSE48350:21:1"t"GSM300219"t"GSM300218"
"GSE48350"t"GSE48350:21:2"t"GSM300220"t"GSM300218"
"GSE48350"t"GSE48350:21:3"t"GSM300221"t"GSM300218"
"GSE48350"t"GSE48350:22:1"t"GSM300223"t"GSM300222"
"GSE48350"t"GSE48350:22:2"t"GSM300224"t"GSM300222"
"GSE48350"t"GSE48350:22:3"t"GSM300225"t"GSM300222"
"GSE48350"t"GSE48350:25:3"t"GSM300229"t"GSM300228"
"GSE48350"t"GSE48350:26:1"t"GSM300231"t"GSM300230"
"GSE48350"t"GSE48350:26:2"t"GSM300232"t"GSM300230"
"GSE48350"t"GSE48350:26:3"t"GSM300233"t"GSM300230"
"GSE48350"t"GSE48350:27:1"t"GSM300235"t"GSM300234"
"GSE48350"t"GSE48350:27:2"t"GSM300236"t"GSM300234"
"GSE48350"t"GSE48350:27:3"t"GSM300237"t"GSM300234"
"GSE48350"t"GSE48350:28:1"t"GSM300239"t"GSM300238"
"GSE48350"t"GSE48350:28:2"t"GSM300240"t"GSM300238"
"GSE48350"t"GSE48350:28:3"t"GSM300241"t"GSM300238"
"GSE48350"t"GSE48350:29:1"t"GSM300243"t"GSM300242"
"GSE48350"t"GSE48350:29:2"t"GSM300244"t"GSM300242"
"GSE48350"t"GSE48350:29:3"t"GSM300245"t"GSM300242"
"GSE48350"t"GSE48350:31:2"t"GSM300249"t"GSM300248"
"GSE48350"t"GSE48350:31:3"t"GSM300250"t"GSM300248"
"GSE48350"t"GSE48350:34:2"t"GSM300253"t"GSM300252"
"GSE48350"t"GSE48350:34:3"t"GSM300254"t"GSM300252"
"GSE48350"t"GSE48350:35:2"t"GSM300256"t"GSM300255"
"GSE48350"t"GSE48350:36:2"t"GSM300259"t"GSM300258"
"GSE48350"t"GSE48350:36:3"t"GSM300260"t"GSM300258"
"GSE48350"t"GSE48350:37:1"t"GSM300262"t"GSM300261"
"GSE48350"t"GSE48350:37:2"t"GSM300263"t"GSM300261"
"GSE48350"t"GSE48350:37:3"t"GSM300264"t"GSM300261"
"GSE48350"t"GSE48350:38:3"t"GSM300266"t"GSM300265"
"GSE48350"t"GSE48350:39:1"t"GSM300268"t"GSM300267"
"GSE48350"t"GSE48350:39:2"t"GSM300269"t"GSM300267"
"GSE48350"t"GSE48350:39:3"t"GSM300270"t"GSM300267"
"GSE48350"t"GSE48350:41:1"t"GSM300276"t"GSM300275"
"GSE48350"t"GSE48350:41:2"t"GSM300277"t"GSM300275"
"GSE48350"t"GSE48350:41:3"t"GSM300278"t"GSM300275"
"GSE48350"t"GSE48350:42:1"t"GSM300280"t"GSM300279"
"GSE48350"t"GSE48350:42:2"t"GSM300281"t"GSM300279"
"GSE48350"t"GSE48350:42:3"t"GSM300282"t"GSM300279"
"GSE48350"t"GSE48350:43:3"t"GSM300284"t"GSM300283"
"GSE48350"t"GSE48350:44:1"t"GSM300286"t"GSM300285"
"GSE48350"t"GSE48350:44:2"t"GSM300287"t"GSM300285"
"GSE48350"t"GSE48350:44:3"t"GSM300288"t"GSM300285"
"GSE48350"t"GSE48350:45:1"t"GSM300290"t"GSM300289"
"GSE48350"t"GSE48350:45:2"t"GSM300291"t"GSM300289"
"GSE48350"t"GSE48350:45:3"t"GSM300292"t"GSM300289"
"GSE48350"t"GSE48350:46:1"t"GSM300294"t"GSM300293"
"GSE48350"t"GSE48350:46:2"t"GSM300295"t"GSM300293"
"GSE48350"t"GSE48350:46:3"t"GSM300296"t"GSM300293"
"GSE48350"t"GSE48350:47:1"t"GSM300298"t"GSM300297"
"GSE48350"t"GSE48350:47:3"t"GSM300299"t"GSM300297"
"GSE48350"t"GSE48350:48:1"t"GSM300301"t"GSM300300"
"GSE48350"t"GSE48350:48:2"t"GSM300302"t"GSM300300"
"GSE48350"t"GSE48350:48:3"t"GSM300303"t"GSM300300"
"GSE48350"t"GSE48350:49:1"t"GSM300305"t"GSM300304"
"GSE48350"t"GSE48350:49:2"t"GSM300306"t"GSM300304"
"GSE48350"t"GSE48350:49:3"t"GSM300307"t"GSM300304"
"GSE48350"t"GSE48350:51:1"t"GSM300313"t"GSM300312"
"GSE48350"t"GSE48350:51:2"t"GSM300314"t"GSM300312"
"GSE48350"t"GSE48350:51:3"t"GSM300315"t"GSM300312"
"GSE48350"t"GSE48350:52:1"t"GSM300317"t"GSM300316"
"GSE48350"t"GSE48350:52:2"t"GSM300318"t"GSM300316"
"GSE48350"t"GSE48350:52:3"t"GSM300319"t"GSM300316"
"GSE48350"t"GSE48350:53:1"t"GSM300321"t"GSM300320"
"GSE48350"t"GSE48350:53:2"t"GSM300322"t"GSM300320"
"GSE48350"t"GSE48350:53:3"t"GSM300323"t"GSM300320"
"GSE48350"t"GSE48350:54:1"t"GSM300325"t"GSM300324"
"GSE48350"t"GSE48350:54:2"t"GSM300326"t"GSM300324"
"GSE48350"t"GSE48350:54:3"t"GSM300327"t"GSM300324"
"GSE48350"t"GSE48350:55:1"t"GSM300329"t"GSM300328"
"GSE48350"t"GSE48350:55:2"t"GSM300330"t"GSM300328"
"GSE48350"t"GSE48350:55:3"t"GSM300331"t"GSM300328"
"GSE48350"t"GSE48350:56:1"t"GSM300333"t"GSM300332"
"GSE48350"t"GSE48350:56:3"t"GSM300335"t"GSM300332"
"GSE48350"t"GSE48350:57:1"t"GSM300339"t"GSM300338"
"GSE48350"t"GSE48350:57:2"t"GSM300340"t"GSM300338"
"GSE48350"t"GSE48350:57:3"t"GSM300341"t"GSM300338"
"GSE48350"t"GSE48350:58:2"t"GSM1176230"t"GSM1176211"
"GSE48350"t"GSE48350:59:2"t"GSM1176231"t"GSM1176212"
"GSE48350"t"GSE48350:59:3"t"GSM1176255"t"GSM1176212"
"GSE48350"t"GSE48350:62:2"t"GSM1176235"t"GSM1176198"
"GSE48350"t"GSE48350:62:3"t"GSM1176258"t"GSM1176198"
"GSE48350"t"GSE48350:64:1"t"GSM1176216"t"GSM1176199"
"GSE48350"t"GSE48350:64:2"t"GSM1176236"t"GSM1176199"
"GSE48350"t"GSE48350:64:3"t"GSM1176259"t"GSM1176199"
"GSE48350"t"GSE48350:65:3"t"GSM1176260"t"GSM1176237"
"GSE48350"t"GSE48350:66:1"t"GSM1176215"t"GSM1176197"
"GSE48350"t"GSE48350:66:2"t"GSM1176233"t"GSM1176197"
"GSE48350"t"GSE48350:66:3"t"GSM1176257"t"GSM1176197"
"GSE48350"t"GSE48350:68:2"t"GSM1176238"t"GSM1176217"
"GSE48350"t"GSE48350:68:3"t"GSM1176262"t"GSM1176217"
"GSE48350"t"GSE48350:69:1"t"GSM1176218"t"GSM1176200"
"GSE48350"t"GSE48350:69:2"t"GSM1176239"t"GSM1176200"
"GSE48350"t"GSE48350:69:3"t"GSM1176263"t"GSM1176200"
"GSE48350"t"GSE48350:71:1"t"GSM1176219"t"GSM1176202"
"GSE48350"t"GSE48350:71:2"t"GSM1176241"t"GSM1176202"
"GSE48350"t"GSE48350:71:3"t"GSM1176265"t"GSM1176202"
"GSE48350"t"GSE48350:72:1"t"GSM1176220"t"GSM1176203"
"GSE48350"t"GSE48350:72:2"t"GSM1176242"t"GSM1176203"
"GSE48350"t"GSE48350:72:3"t"GSM1176266"t"GSM1176203"
"GSE48350"t"GSE48350:73:3"t"GSM1176267"t"GSM1176243"
"GSE48350"t"GSE48350:74:3"t"GSM1176268"t"GSM1176244"
"GSE48350"t"GSE48350:75:2"t"GSM1176245"t"GSM1176221"
"GSE48350"t"GSE48350:75:3"t"GSM1176269"t"GSM1176221"
"GSE48350"t"GSE48350:76:1"t"GSM1176222"t"GSM1176204"
"GSE48350"t"GSE48350:76:2"t"GSM1176246"t"GSM1176204"
"GSE48350"t"GSE48350:77:2"t"GSM1176247"t"GSM1176223"
"GSE48350"t"GSE48350:79:1"t"GSM1176225"t"GSM1176205"
"GSE48350"t"GSE48350:79:2"t"GSM1176248"t"GSM1176205"
"GSE48350"t"GSE48350:79:3"t"GSM1176270"t"GSM1176205"
"GSE48350"t"GSE48350:81:1"t"GSM1176226"t"GSM1176207"
"GSE48350"t"GSE48350:81:2"t"GSM1176250"t"GSM1176207"
"GSE48350"t"GSE48350:81:3"t"GSM1176272"t"GSM1176207"
"GSE48350"t"GSE48350:82:1"t"GSM1176227"t"GSM1176208"
"GSE48350"t"GSE48350:82:2"t"GSM1176251"t"GSM1176208"
"GSE48350"t"GSE48350:83:3"t"GSM1176273"t"GSM1176252"
"GSE48350"t"GSE48350:84:1"t"GSM1176228"t"GSM1176209"
"GSE48350"t"GSE48350:84:2"t"GSM1176253"t"GSM1176209"
"GSE48350"t"GSE48350:84:3"t"GSM1176274"t"GSM1176209"
"GSE48350"t"GSE48350:85:1"t"GSM1176229"t"GSM1176210"
"GSE48350"t"GSE48350:85:2"t"GSM1176254"t"GSM1176210"
"GSE48350"t"GSE48350:85:3"t"GSM1176275"t"GSM1176210"
"GSE48432"t"GSE48432:0000000:1"t"GSM1177872;GSM1177873"t"GSM1177870;GSM1177871"
"GSE48616"t"GSE48616:0:1"t"GSM1182431"t"GSM1182427"
"GSE48616"t"GSE48616:0:2"t"GSM1182435"t"GSM1182427"
"GSE48616"t"GSE48616:0:3"t"GSM1182439"t"GSM1182427"
"GSE48616"t"GSE48616:1:1"t"GSM1182432"t"GSM1182428"
"GSE48616"t"GSE48616:1:2"t"GSM1182436"t"GSM1182428"
"GSE48616"t"GSE48616:1:3"t"GSM1182440"t"GSM1182428"
"GSE48616"t"GSE48616:2:1"t"GSM1182433"t"GSM1182429"
"GSE48616"t"GSE48616:2:2"t"GSM1182437"t"GSM1182429"
"GSE48616"t"GSE48616:2:3"t"GSM1182441"t"GSM1182429"
"GSE48616"t"GSE48616:3:1"t"GSM1182434"t"GSM1182430"
"GSE48616"t"GSE48616:3:2"t"GSM1182438"t"GSM1182430"
"GSE48616"t"GSE48616:3:3"t"GSM1182442"t"GSM1182430"
"GSE48757"t"GSE48757:0000000:1"t"GSM1183860;GSM1183861;GSM1183862"t"GSM1183857;GSM1183858;GSM1183859"
"GSE48780"t"GSE48780:0000000:01"t"GSM1184436"t"GSM1184435"
"GSE48780"t"GSE48780:0000000:02"t"GSM1184437"t"GSM1184435"
"GSE48780"t"GSE48780:0000000:03"t"GSM1184438"t"GSM1184435"
"GSE48780"t"GSE48780:0000000:04"t"GSM1184439"t"GSM1184435"
"GSE48780"t"GSE48780:0000000:05"t"GSM1184440"t"GSM1184435"
"GSE48780"t"GSE48780:0000000:06"t"GSM1184441"t"GSM1184435"
"GSE48780"t"GSE48780:0000000:07"t"GSM1184442"t"GSM1184435"
"GSE48780"t"GSE48780:0000000:08"t"GSM1184443"t"GSM1184435"
"GSE48780"t"GSE48780:0000000:09"t"GSM1184444"t"GSM1184435"
"GSE48780"t"GSE48780:0000000:10"t"GSM1184445"t"GSM1184435"
"GSE48780"t"GSE48780:0000000:11"t"GSM1184446"t"GSM1184435"
"GSE48780"t"GSE48780:0000000:12"t"GSM1184447"t"GSM1184435"
"GSE48780"t"GSE48780:0000000:13"t"GSM1184448"t"GSM1184435"
"GSE48780"t"GSE48780:0000000:14"t"GSM1184449"t"GSM1184435"
"GSE48780"t"GSE48780:0000000:15"t"GSM1184450"t"GSM1184435"
"GSE48780"t"GSE48780:0000000:16"t"GSM1184451"t"GSM1184435"
"GSE48780"t"GSE48780:0000000:17"t"GSM1184452"t"GSM1184435"
"GSE48780"t"GSE48780:0000000:18"t"GSM1184453"t"GSM1184435"
"GSE48780"t"GSE48780:0000000:19"t"GSM1184454"t"GSM1184435"
"GSE48780"t"GSE48780:0000000:20"t"GSM1184455"t"GSM1184435"
"GSE48780"t"GSE48780:0000000:21"t"GSM1184456"t"GSM1184435"
"GSE48780"t"GSE48780:0000000:22"t"GSM1184457"t"GSM1184435"
"GSE48780"t"GSE48780:0000000:23"t"GSM1184458"t"GSM1184435"
"GSE48780"t"GSE48780:0000000:24"t"GSM1184459"t"GSM1184435"
"GSE48780"t"GSE48780:0000000:25"t"GSM1184460"t"GSM1184435"
"GSE48780"t"GSE48780:0000000:26"t"GSM1184461"t"GSM1184435"
"GSE48780"t"GSE48780:0000000:27"t"GSM1184462"t"GSM1184435"
"GSE48780"t"GSE48780:0000000:28"t"GSM1184463"t"GSM1184435"
"GSE48780"t"GSE48780:0000000:29"t"GSM1184464"t"GSM1184435"
"GSE48780"t"GSE48780:0000000:30"t"GSM1184465"t"GSM1184435"
"GSE48780"t"GSE48780:0000000:31"t"GSM1184466"t"GSM1184435"
"GSE48780"t"GSE48780:0000000:32"t"GSM1184467"t"GSM1184435"
"GSE48780"t"GSE48780:0000000:33"t"GSM1184468"t"GSM1184435"
"GSE48780"t"GSE48780:0000000:34"t"GSM1184469"t"GSM1184435"
"GSE48780"t"GSE48780:0000000:35"t"GSM1184470"t"GSM1184435"
"GSE48780"t"GSE48780:0000000:36"t"GSM1184471"t"GSM1184435"
"GSE48780"t"GSE48780:0000000:37"t"GSM1184472"t"GSM1184435"
"GSE48780"t"GSE48780:0000000:38"t"GSM1184473"t"GSM1184435"
"GSE48780"t"GSE48780:0000000:39"t"GSM1184474"t"GSM1184435"
"GSE48780"t"GSE48780:0000000:40"t"GSM1184475"t"GSM1184435"
"GSE48780"t"GSE48780:0000000:41"t"GSM1184476"t"GSM1184435"
"GSE48780"t"GSE48780:0000000:42"t"GSM1184477"t"GSM1184435"
"GSE48780"t"GSE48780:0000000:43"t"GSM1184478"t"GSM1184435"
"GSE48780"t"GSE48780:0000000:44"t"GSM1184479"t"GSM1184435"
"GSE48780"t"GSE48780:0000000:45"t"GSM1184480"t"GSM1184435"
"GSE48780"t"GSE48780:0000000:46"t"GSM1184481"t"GSM1184435"
"GSE48780"t"GSE48780:0000000:47"t"GSM1184482"t"GSM1184435"
"GSE48780"t"GSE48780:0000000:48"t"GSM1184483"t"GSM1184435"
"GSE48780"t"GSE48780:0000000:49"t"GSM1184484"t"GSM1184435"
"GSE48780"t"GSE48780:0000000:50"t"GSM1184485"t"GSM1184435"
"GSE48780"t"GSE48780:0000000:51"t"GSM1184486"t"GSM1184435"
"GSE48780"t"GSE48780:0000000:52"t"GSM1184487"t"GSM1184435"
"GSE48780"t"GSE48780:0000000:53"t"GSM1184488"t"GSM1184435"
"GSE48780"t"GSE48780:0000000:54"t"GSM1184489"t"GSM1184435"
"GSE48780"t"GSE48780:0000000:55"t"GSM1184490"t"GSM1184435"
"GSE48780"t"GSE48780:0000000:56"t"GSM1184491"t"GSM1184435"
"GSE48780"t"GSE48780:0000000:57"t"GSM1184492"t"GSM1184435"
"GSE48780"t"GSE48780:0000000:58"t"GSM1184493"t"GSM1184435"
"GSE48780"t"GSE48780:0000000:59"t"GSM1184494"t"GSM1184435"
"GSE48780"t"GSE48780:0000000:60"t"GSM1184495"t"GSM1184435"
"GSE48780"t"GSE48780:0000000:61"t"GSM1184496"t"GSM1184435"
"GSE48780"t"GSE48780:0000000:62"t"GSM1184497"t"GSM1184435"
"GSE48780"t"GSE48780:0000000:63"t"GSM1184498"t"GSM1184435"
"GSE48780"t"GSE48780:0000000:64"t"GSM1184499"t"GSM1184435"
"GSE48780"t"GSE48780:0000000:65"t"GSM1184500"t"GSM1184435"
"GSE48780"t"GSE48780:0000000:66"t"GSM1184501"t"GSM1184435"
"GSE48780"t"GSE48780:0000000:67"t"GSM1184502"t"GSM1184435"
"GSE48780"t"GSE48780:0000000:68"t"GSM1184503"t"GSM1184435"
"GSE48780"t"GSE48780:0000000:69"t"GSM1184504"t"GSM1184435"
"GSE48780"t"GSE48780:0000000:70"t"GSM1184505"t"GSM1184435"
"GSE48780"t"GSE48780:0000000:71"t"GSM1184506"t"GSM1184435"
"GSE48780"t"GSE48780:0000000:72"t"GSM1184507"t"GSM1184435"
"GSE48780"t"GSE48780:0000000:73"t"GSM1184508"t"GSM1184435"
"GSE48780"t"GSE48780:0000000:74"t"GSM1184509"t"GSM1184435"
"GSE48780"t"GSE48780:0000000:75"t"GSM1184510"t"GSM1184435"
"GSE48780"t"GSE48780:0000000:76"t"GSM1184511"t"GSM1184435"
"GSE48780"t"GSE48780:0000000:77"t"GSM1184512"t"GSM1184435"
"GSE48780"t"GSE48780:0000000:78"t"GSM1184513"t"GSM1184435"
"GSE48780"t"GSE48780:0000000:79"t"GSM1184514"t"GSM1184435"
"GSE48780"t"GSE48780:0000000:80"t"GSM1184515"t"GSM1184435"
"GSE48780"t"GSE48780:0000000:81"t"GSM1184516"t"GSM1184435"
"GSE48780"t"GSE48780:0000000:82"t"GSM1184517"t"GSM1184435"
"GSE48841"t"GSE48841:0:1"t"GSM1185523;GSM1185524;GSM1185529"t"GSM1185521;GSM1185522;GSM1185525"
"GSE48841"t"GSE48841:1:1"t"GSM1185530"t"GSM1185526"
"GSE48841"t"GSE48841:2:1"t"GSM1185531"t"GSM1185527"
"GSE48841"t"GSE48841:3:1"t"GSM1185532"t"GSM1185528"
"GSE49243"t"GSE49243:0000000:01"t"GSM1195779"t"GSM1195778"
"GSE49243"t"GSE49243:0000000:02"t"GSM1195780"t"GSM1195778"
"GSE49243"t"GSE49243:0000000:03"t"GSM1195781"t"GSM1195778"
"GSE49243"t"GSE49243:0000000:04"t"GSM1195782"t"GSM1195778"
"GSE49243"t"GSE49243:0000000:05"t"GSM1195783"t"GSM1195778"
"GSE49243"t"GSE49243:0000000:06"t"GSM1195784"t"GSM1195778"
"GSE49243"t"GSE49243:0000000:07"t"GSM1195785"t"GSM1195778"
"GSE49243"t"GSE49243:0000000:08"t"GSM1195786"t"GSM1195778"
"GSE49243"t"GSE49243:0000000:09"t"GSM1195787"t"GSM1195778"
"GSE49243"t"GSE49243:0000000:10"t"GSM1195788"t"GSM1195778"
"GSE49243"t"GSE49243:0000000:11"t"GSM1195789"t"GSM1195778"
"GSE49243"t"GSE49243:0000000:12"t"GSM1195790"t"GSM1195778"
"GSE49243"t"GSE49243:0000000:13"t"GSM1195791"t"GSM1195778"
"GSE49243"t"GSE49243:0000000:14"t"GSM1195792"t"GSM1195778"
"GSE49243"t"GSE49243:0000000:15"t"GSM1195793"t"GSM1195778"
"GSE49243"t"GSE49243:0000000:16"t"GSM1195794"t"GSM1195778"
"GSE49243"t"GSE49243:0000000:17"t"GSM1195795"t"GSM1195778"
"GSE49243"t"GSE49243:0000000:18"t"GSM1195796"t"GSM1195778"
"GSE49243"t"GSE49243:0000000:19"t"GSM1195797"t"GSM1195778"
"GSE49243"t"GSE49243:0000000:20"t"GSM1195798"t"GSM1195778"
"GSE49243"t"GSE49243:0000000:21"t"GSM1195799"t"GSM1195778"
"GSE49243"t"GSE49243:0000000:22"t"GSM1195800"t"GSM1195778"
"GSE49243"t"GSE49243:0000000:23"t"GSM1195801"t"GSM1195778"
"GSE49243"t"GSE49243:0000000:24"t"GSM1195802"t"GSM1195778"
"GSE49243"t"GSE49243:0000000:25"t"GSM1195803"t"GSM1195778"
"GSE49243"t"GSE49243:0000000:26"t"GSM1195804"t"GSM1195778"
"GSE49243"t"GSE49243:0000000:27"t"GSM1195805"t"GSM1195778"
"GSE49243"t"GSE49243:0000000:28"t"GSM1195806"t"GSM1195778"
"GSE49243"t"GSE49243:0000000:29"t"GSM1195807"t"GSM1195778"
"GSE49243"t"GSE49243:0000000:30"t"GSM1195808"t"GSM1195778"
"GSE49243"t"GSE49243:0000000:31"t"GSM1195809"t"GSM1195778"
"GSE49243"t"GSE49243:0000000:32"t"GSM1195810"t"GSM1195778"
"GSE49243"t"GSE49243:0000000:33"t"GSM1195811"t"GSM1195778"
"GSE49243"t"GSE49243:0000000:34"t"GSM1195812"t"GSM1195778"
"GSE49243"t"GSE49243:0000000:35"t"GSM1195813"t"GSM1195778"
"GSE49243"t"GSE49243:0000000:36"t"GSM1195814"t"GSM1195778"
"GSE49243"t"GSE49243:0000000:37"t"GSM1195815"t"GSM1195778"
"GSE49243"t"GSE49243:0000000:38"t"GSM1195816"t"GSM1195778"
"GSE49243"t"GSE49243:0000000:39"t"GSM1195817"t"GSM1195778"
"GSE49243"t"GSE49243:0000000:40"t"GSM1195818"t"GSM1195778"
"GSE49243"t"GSE49243:0000000:41"t"GSM1195819"t"GSM1195778"
"GSE49243"t"GSE49243:0000000:42"t"GSM1195820"t"GSM1195778"
"GSE49243"t"GSE49243:0000000:43"t"GSM1195821"t"GSM1195778"
"GSE49243"t"GSE49243:0000000:44"t"GSM1195822"t"GSM1195778"
"GSE49243"t"GSE49243:0000000:45"t"GSM1195823"t"GSM1195778"
"GSE49243"t"GSE49243:0000000:46"t"GSM1195824"t"GSM1195778"
"GSE49243"t"GSE49243:0000000:47"t"GSM1195825"t"GSM1195778"
"GSE49243"t"GSE49243:0000000:48"t"GSM1195826"t"GSM1195778"
"GSE49243"t"GSE49243:0000000:49"t"GSM1195827"t"GSM1195778"
"GSE49243"t"GSE49243:0000000:50"t"GSM1195828"t"GSM1195778"
"GSE49243"t"GSE49243:0000000:51"t"GSM1195829"t"GSM1195778"
"GSE49243"t"GSE49243:0000000:52"t"GSM1195830"t"GSM1195778"
"GSE49243"t"GSE49243:0000000:53"t"GSM1195831"t"GSM1195778"
"GSE49243"t"GSE49243:0000000:54"t"GSM1195832"t"GSM1195778"
"GSE49243"t"GSE49243:0000000:55"t"GSM1195833"t"GSM1195778"
"GSE49243"t"GSE49243:0000000:56"t"GSM1195834"t"GSM1195778"
"GSE49243"t"GSE49243:0000000:57"t"GSM1195835"t"GSM1195778"
"GSE49243"t"GSE49243:0000000:58"t"GSM1195836"t"GSM1195778"
"GSE49243"t"GSE49243:0000000:59"t"GSM1195837"t"GSM1195778"
"GSE49243"t"GSE49243:0000000:60"t"GSM1195838"t"GSM1195778"
"GSE49243"t"GSE49243:0000000:61"t"GSM1195839"t"GSM1195778"
"GSE49243"t"GSE49243:0000000:62"t"GSM1195840"t"GSM1195778"
"GSE49243"t"GSE49243:0000000:63"t"GSM1195841"t"GSM1195778"
"GSE49243"t"GSE49243:0000000:64"t"GSM1195842"t"GSM1195778"
"GSE49243"t"GSE49243:0000000:65"t"GSM1195843"t"GSM1195778"
"GSE49243"t"GSE49243:0000000:66"t"GSM1195844"t"GSM1195778"
"GSE49243"t"GSE49243:0000000:67"t"GSM1195845"t"GSM1195778"
"GSE49243"t"GSE49243:0000000:68"t"GSM1195846"t"GSM1195778"
"GSE49243"t"GSE49243:0000000:69"t"GSM1195847"t"GSM1195778"
"GSE49243"t"GSE49243:0000000:70"t"GSM1195848"t"GSM1195778"
"GSE49243"t"GSE49243:0000000:71"t"GSM1195849"t"GSM1195778"
"GSE49243"t"GSE49243:0000000:72"t"GSM1195850"t"GSM1195778"
"GSE49644"t"GSE49644:1:1"t"GSM1203357;GSM1203358;GSM1203359"t"GSM1203354;GSM1203355;GSM1203356"
"GSE49644"t"GSE49644:2:1"t"GSM1203363;GSM1203364;GSM1203365"t"GSM1203360;GSM1203361;GSM1203362"
"GSE49644"t"GSE49644:3:1"t"GSM1203369;GSM1203370;GSM1203371"t"GSM1203366;GSM1203367;GSM1203368"
"GSE49675"t"GSE49675:0:1"t"GSM1204760"t"GSM1204757"
"GSE49675"t"GSE49675:1:1"t"GSM1204761"t"GSM1204758"
"GSE49675"t"GSE49675:2:1"t"GSM1204762"t"GSM1204759"
"GSE49822"t"GSE49822:0000000:01"t"GSM855949"t"GSM855947"
"GSE49822"t"GSE49822:0000000:02"t"GSM855957"t"GSM855947"
"GSE49822"t"GSE49822:0000000:03"t"GSM855963"t"GSM855947"
"GSE49822"t"GSE49822:0000000:04"t"GSM855966"t"GSM855947"
"GSE49822"t"GSE49822:0000000:05"t"GSM855967"t"GSM855947"
"GSE49822"t"GSE49822:0000000:06"t"GSM855968"t"GSM855947"
"GSE49822"t"GSE49822:0000000:07"t"GSM884997"t"GSM855947"
"GSE49822"t"GSE49822:0000000:08"t"GSM885000"t"GSM855947"
"GSE49822"t"GSE49822:0000000:09"t"GSM885001"t"GSM855947"
"GSE49822"t"GSE49822:0000000:10"t"GSM885005"t"GSM855947"
"GSE49822"t"GSE49822:0000000:11"t"GSM885006"t"GSM855947"
"GSE49822"t"GSE49822:0000000:12"t"GSM885010"t"GSM855947"
"GSE49822"t"GSE49822:0000000:13"t"GSM885011"t"GSM855947"
"GSE49822"t"GSE49822:0000000:14"t"GSM885014"t"GSM855947"
"GSE49822"t"GSE49822:0000000:15"t"GSM958490"t"GSM855947"
"GSE49822"t"GSE49822:0000000:16"t"GSM958493"t"GSM855947"
"GSE49822"t"GSE49822:0000000:17"t"GSM1207726"t"GSM855947"
"GSE49822"t"GSE49822:0000000:18"t"GSM1207727"t"GSM855947"
"GSE49822"t"GSE49822:0000000:19"t"GSM1207728"t"GSM855947"
"GSE49822"t"GSE49822:0000000:20"t"GSM1207729"t"GSM855947"
"GSE49822"t"GSE49822:0000000:21"t"GSM1207730"t"GSM855947"
"GSE49853"t"GSE49853:0000000:1"t"GSM1208280;GSM1208281"t"GSM1208282;GSM1208283"
"GSE49891"t"GSE49891:0000000:1"t"GSM1208975;GSM1208976;GSM1208977"t"GSM1208973;GSM1208974"
"GSE49896"t"GSE49896:0000000:01"t"GSM1209034"t"GSM1209033"
"GSE49896"t"GSE49896:0000000:02"t"GSM1209035"t"GSM1209033"
"GSE49896"t"GSE49896:0000000:03"t"GSM1209036"t"GSM1209033"
"GSE49896"t"GSE49896:0000000:04"t"GSM1209037"t"GSM1209033"
"GSE49896"t"GSE49896:0000000:05"t"GSM1209038"t"GSM1209033"
"GSE49896"t"GSE49896:0000000:06"t"GSM1209039"t"GSM1209033"
"GSE49896"t"GSE49896:0000000:07"t"GSM1209040"t"GSM1209033"
"GSE49896"t"GSE49896:0000000:08"t"GSM1209041"t"GSM1209033"
"GSE49896"t"GSE49896:0000000:09"t"GSM1209042"t"GSM1209033"
"GSE49896"t"GSE49896:0000000:10"t"GSM1209043"t"GSM1209033"
"GSE49896"t"GSE49896:0000000:11"t"GSM1209044"t"GSM1209033"
"GSE49896"t"GSE49896:0000000:12"t"GSM1209045"t"GSM1209033"
"GSE49896"t"GSE49896:0000000:13"t"GSM1209046"t"GSM1209033"
"GSE49896"t"GSE49896:0000000:14"t"GSM1209047"t"GSM1209033"
"GSE49896"t"GSE49896:0000000:15"t"GSM1209048"t"GSM1209033"
"GSE49896"t"GSE49896:0000000:16"t"GSM1209049"t"GSM1209033"
"GSE49896"t"GSE49896:0000000:17"t"GSM1209050"t"GSM1209033"
"GSE49896"t"GSE49896:0000000:18"t"GSM1209051"t"GSM1209033"
"GSE49896"t"GSE49896:0000000:19"t"GSM1209052"t"GSM1209033"
"GSE49896"t"GSE49896:0000000:20"t"GSM1209053"t"GSM1209033"
"GSE49896"t"GSE49896:0000000:21"t"GSM1209054"t"GSM1209033"
"GSE49896"t"GSE49896:0000000:22"t"GSM1209055"t"GSM1209033"
"GSE49896"t"GSE49896:0000000:23"t"GSM1209056"t"GSM1209033"
"GSE49896"t"GSE49896:0000000:24"t"GSM1209057"t"GSM1209033"
"GSE49896"t"GSE49896:0000000:25"t"GSM1209058"t"GSM1209033"
"GSE49896"t"GSE49896:0000000:26"t"GSM1209059"t"GSM1209033"
"GSE49896"t"GSE49896:0000000:27"t"GSM1209060"t"GSM1209033"
"GSE49896"t"GSE49896:0000000:28"t"GSM1209061"t"GSM1209033"
"GSE49896"t"GSE49896:0000000:29"t"GSM1209062"t"GSM1209033"
"GSE49896"t"GSE49896:0000000:30"t"GSM1209063"t"GSM1209033"
"GSE49896"t"GSE49896:0000000:31"t"GSM1209064"t"GSM1209033"
"GSE49896"t"GSE49896:0000000:32"t"GSM1209065"t"GSM1209033"
"GSE49896"t"GSE49896:0000000:33"t"GSM1209066"t"GSM1209033"
"GSE49896"t"GSE49896:0000000:34"t"GSM1209067"t"GSM1209033"
"GSE49896"t"GSE49896:0000000:35"t"GSM1209068"t"GSM1209033"
"GSE49896"t"GSE49896:0000000:36"t"GSM1209069"t"GSM1209033"
"GSE49896"t"GSE49896:0000000:37"t"GSM1209070"t"GSM1209033"
"GSE49896"t"GSE49896:0000000:38"t"GSM1209071"t"GSM1209033"
"GSE49896"t"GSE49896:0000000:39"t"GSM1209072"t"GSM1209033"
"GSE49896"t"GSE49896:0000000:40"t"GSM1209073"t"GSM1209033"
"GSE49896"t"GSE49896:0000000:41"t"GSM1209074"t"GSM1209033"
"GSE49896"t"GSE49896:0000000:42"t"GSM1209075"t"GSM1209033"
"GSE49896"t"GSE49896:0000000:43"t"GSM1209076"t"GSM1209033"
"GSE49896"t"GSE49896:0000000:44"t"GSM1209077"t"GSM1209033"
"GSE49896"t"GSE49896:0000000:45"t"GSM1209078"t"GSM1209033"
"GSE49896"t"GSE49896:0000000:46"t"GSM1209079"t"GSM1209033"
"GSE49896"t"GSE49896:0000000:47"t"GSM1209080"t"GSM1209033"
"GSE49896"t"GSE49896:0000000:48"t"GSM1209081"t"GSM1209033"
"GSE49896"t"GSE49896:0000000:49"t"GSM1209082"t"GSM1209033"
"GSE49896"t"GSE49896:0000000:50"t"GSM1209083"t"GSM1209033"
"GSE49896"t"GSE49896:0000000:51"t"GSM1209084"t"GSM1209033"
"GSE49896"t"GSE49896:0000000:52"t"GSM1209085"t"GSM1209033"
"GSE49896"t"GSE49896:0000000:53"t"GSM1209086"t"GSM1209033"
"GSE49896"t"GSE49896:0000000:54"t"GSM1209087"t"GSM1209033"
"GSE49896"t"GSE49896:0000000:55"t"GSM1209088"t"GSM1209033"
"GSE49896"t"GSE49896:0000000:56"t"GSM1209089"t"GSM1209033"
"GSE49896"t"GSE49896:0000000:57"t"GSM1209090"t"GSM1209033"
"GSE49896"t"GSE49896:0000000:58"t"GSM1209091"t"GSM1209033"
"GSE49896"t"GSE49896:0000000:59"t"GSM1209092"t"GSM1209033"
"GSE49896"t"GSE49896:0000000:60"t"GSM1209093"t"GSM1209033"
"GSE49896"t"GSE49896:0000000:61"t"GSM1209094"t"GSM1209033"
"GSE49896"t"GSE49896:0000000:62"t"GSM1209095"t"GSM1209033"
"GSE49896"t"GSE49896:0000000:63"t"GSM1209096"t"GSM1209033"
"GSE49896"t"GSE49896:0000000:64"t"GSM1209097"t"GSM1209033"
"GSE49896"t"GSE49896:0000000:65"t"GSM1209098"t"GSM1209033"
"GSE49896"t"GSE49896:0000000:66"t"GSM1209099"t"GSM1209033"
"GSE49896"t"GSE49896:0000000:67"t"GSM1209100"t"GSM1209033"
"GSE49896"t"GSE49896:0000000:68"t"GSM1209101"t"GSM1209033"
"GSE49896"t"GSE49896:0000000:69"t"GSM1209102"t"GSM1209033"
"GSE49896"t"GSE49896:0000000:70"t"GSM1209103"t"GSM1209033"
"GSE49896"t"GSE49896:0000000:71"t"GSM1209104"t"GSM1209033"
"GSE49896"t"GSE49896:0000000:72"t"GSM1209105"t"GSM1209033"
"GSE49896"t"GSE49896:0000000:73"t"GSM1209106"t"GSM1209033"
"GSE49896"t"GSE49896:0000000:74"t"GSM1209107"t"GSM1209033"
"GSE49896"t"GSE49896:0000000:75"t"GSM1209108"t"GSM1209033"
"GSE49896"t"GSE49896:0000000:76"t"GSM1209109"t"GSM1209033"
"GSE49896"t"GSE49896:0000000:77"t"GSM1209110"t"GSM1209033"
"GSE49896"t"GSE49896:0000000:78"t"GSM1209111"t"GSM1209033"
"GSE49896"t"GSE49896:0000000:79"t"GSM1209112"t"GSM1209033"
"GSE49896"t"GSE49896:0000000:80"t"GSM1209113"t"GSM1209033"
"GSE49896"t"GSE49896:0000000:81"t"GSM1209114"t"GSM1209033"
"GSE49896"t"GSE49896:0000000:82"t"GSM1209115"t"GSM1209033"
"GSE49896"t"GSE49896:0000000:83"t"GSM1209116"t"GSM1209033"
"GSE49896"t"GSE49896:0000000:84"t"GSM1209117"t"GSM1209033"
"GSE49896"t"GSE49896:0000000:85"t"GSM1209118"t"GSM1209033"
"GSE49896"t"GSE49896:0000000:86"t"GSM1209119"t"GSM1209033"
"GSE49896"t"GSE49896:0000000:87"t"GSM1209120"t"GSM1209033"
"GSE49896"t"GSE49896:0000000:88"t"GSM1209121"t"GSM1209033"
"GSE49896"t"GSE49896:0000000:89"t"GSM1209122"t"GSM1209033"
"GSE49896"t"GSE49896:0000000:90"t"GSM1209123"t"GSM1209033"
"GSE49896"t"GSE49896:0000000:91"t"GSM1209124"t"GSM1209033"
"GSE49896"t"GSE49896:0000000:92"t"GSM1209125"t"GSM1209033"
"GSE49896"t"GSE49896:0000000:93"t"GSM1209126"t"GSM1209033"
"GSE49896"t"GSE49896:0000000:94"t"GSM1209127"t"GSM1209033"
"GSE49896"t"GSE49896:0000000:95"t"GSM1209128"t"GSM1209033"
"GSE49896"t"GSE49896:0000000:96"t"GSM1209129"t"GSM1209033"
"GSE49896"t"GSE49896:0000000:97"t"GSM1209130"t"GSM1209033"
"GSE49896"t"GSE49896:0000000:98"t"GSM1209131"t"GSM1209033"
"GSE49896"t"GSE49896:0000000:99"t"GSM1209132"t"GSM1209033"
"GSE50173"t"GSE50173:0000000:1"t"GSM1215100"t"GSM1215101"
"GSE50378"t"GSE50378:0:1"t"GSM1217734"t"GSM1217732"
"GSE50378"t"GSE50378:1:1"t"GSM1217733"t"GSM1217731"
"GSE50451"t"GSE50451:0000000:1"t"GSM1219500;GSM1219501;GSM1219502;GSM1219503;GSM1219504;GSM1219505"t"GSM1219497;GSM1219498;GSM1219499"
"GSE50451"t"GSE50451:0000000:2"t"GSM1219506;GSM1219507;GSM1219508"t"GSM1219497;GSM1219498;GSM1219499"
"GSE50451"t"GSE50451:0000000:3"t"GSM1400424;GSM1400425;GSM1400426"t"GSM1219497;GSM1219498;GSM1219499"
"GSE50451"t"GSE50451:0000000:4"t"GSM1400427;GSM1400428;GSM1400429"t"GSM1219497;GSM1219498;GSM1219499"
"GSE50677"t"GSE50677:01:1"t"GSM1226173"t"GSM1226169"
"GSE50677"t"GSE50677:01:2"t"GSM1226177"t"GSM1226169"
"GSE50677"t"GSE50677:01:3"t"GSM1226186"t"GSM1226169"
"GSE50677"t"GSE50677:01:4"t"GSM1226194"t"GSM1226169"
"GSE50677"t"GSE50677:02:1"t"GSM1226174"t"GSM1226170"
"GSE50677"t"GSE50677:02:2"t"GSM1226178"t"GSM1226170"
"GSE50677"t"GSE50677:03:1"t"GSM1226175"t"GSM1226171"
"GSE50677"t"GSE50677:03:2"t"GSM1226179"t"GSM1226171"
"GSE50677"t"GSE50677:04:1"t"GSM1226176"t"GSM1226172"
"GSE50677"t"GSE50677:04:2"t"GSM1226180"t"GSM1226172"
"GSE50677"t"GSE50677:05:4"t"GSM1226189"t"GSM1226181"
"GSE50677"t"GSE50677:06:4"t"GSM1226190"t"GSM1226182"
"GSE50677"t"GSE50677:07:4"t"GSM1226191"t"GSM1226183"
"GSE50677"t"GSE50677:08:4"t"GSM1226192"t"GSM1226184"
"GSE50677"t"GSE50677:09:4"t"GSM1226193"t"GSM1226185"
"GSE50677"t"GSE50677:11:4"t"GSM1226195"t"GSM1226187"
"GSE50677"t"GSE50677:12:4"t"GSM1226196"t"GSM1226188"
"GSE50683"t"GSE50683:0000000:1"t"GSM1226234;GSM1226235;GSM1226236"t"GSM1226231;GSM1226232;GSM1226233"
"GSE50700"t"GSE50700:1:1"t"GSM1226617"t"GSM1226613"
"GSE50700"t"GSE50700:2:1"t"GSM1226618"t"GSM1226614"
"GSE50700"t"GSE50700:3:1"t"GSM1226616"t"GSM1226615"
"GSE50738"t"GSE50738:1:1"t"GSM1227418"t"GSM1227417"
"GSE50738"t"GSE50738:1:2"t"GSM1227442"t"GSM1227417"
"GSE50738"t"GSE50738:1:3"t"GSM1227452;GSM1227453"t"GSM1227417"
"GSE50738"t"GSE50738:2:2"t"GSM1227443"t"GSM1227419"
"GSE50738"t"GSE50738:3:2"t"GSM1227444"t"GSM1227420"
"GSE50738"t"GSE50738:4:1"t"GSM1227422"t"GSM1227421"
"GSE50738"t"GSE50738:4:2"t"GSM1227445;GSM1227446"t"GSM1227421"
"GSE50738"t"GSE50738:5:1"t"GSM1227424"t"GSM1227423"
"GSE50738"t"GSE50738:5:2"t"GSM1227435;GSM1227436"t"GSM1227423"
"GSE50738"t"GSE50738:5:3"t"GSM1227447"t"GSM1227423"
"GSE50738"t"GSE50738:6:1"t"GSM1227426"t"GSM1227425"
"GSE50738"t"GSE50738:6:2"t"GSM1227437"t"GSM1227425"
"GSE50738"t"GSE50738:6:3"t"GSM1227448"t"GSM1227425"
"GSE50738"t"GSE50738:7:1"t"GSM1227428"t"GSM1227427"
"GSE50738"t"GSE50738:7:2"t"GSM1227438;GSM1227439"t"GSM1227427"
"GSE50738"t"GSE50738:7:3"t"GSM1227449"t"GSM1227427"
"GSE50738"t"GSE50738:8:1"t"GSM1227430"t"GSM1227429"
"GSE50738"t"GSE50738:8:2"t"GSM1227440;GSM1227441"t"GSM1227429"
"GSE50738"t"GSE50738:8:3"t"GSM1227450"t"GSM1227429"
"GSE50772"t"GSE50772:0000000:1"t"GSM1228863;GSM1228864;GSM1228865;GSM1228873;GSM1228874;GSM1228875;GSM1228877;GSM1228883;GSM1228884;GSM1228885;GSM1228886;GSM1228887;GSM1228888;GSM1228889;GSM1228890;GSM1228891;GSM1228892;GSM1228893;GSM1228894;GSM1228895;GSM1228896;GSM1228897;GSM1228898;GSM1228899;GSM1228900;GSM1228901;GSM1228902;GSM1228903;GSM1228904;GSM1228905;GSM1228906;GSM1228907;GSM1228908;GSM1228909;GSM1228910;GSM1228911;GSM1228912;GSM1228913;GSM1228914;GSM1228919;GSM1228920;GSM1228921;GSM1228922;GSM1228923;GSM1228924;GSM1228925;GSM1228926;GSM1228927;GSM1228928;GSM1228929;GSM1228930;GSM1228931;GSM1228932;GSM1228933;GSM1228934;GSM1228935;GSM1228936;GSM1228937;GSM1228938;GSM1228939;GSM1228940"t"GSM1228860;GSM1228861;GSM1228862;GSM1228866;GSM1228867;GSM1228868;GSM1228869;GSM1228870;GSM1228871;GSM1228872;GSM1228876;GSM1228878;GSM1228879;GSM1228880;GSM1228881;GSM1228882;GSM1228915;GSM1228916;GSM1228917;GSM1228918"
"GSE50774"t"GSE50774:0000000:01"t"GSM1228942"t"GSM1228941"
"GSE50774"t"GSE50774:0000000:02"t"GSM1228943"t"GSM1228941"
"GSE50774"t"GSE50774:0000000:03"t"GSM1228944"t"GSM1228941"
"GSE50774"t"GSE50774:0000000:04"t"GSM1228945"t"GSM1228941"
"GSE50774"t"GSE50774:0000000:05"t"GSM1228946"t"GSM1228941"
"GSE50774"t"GSE50774:0000000:06"t"GSM1228947"t"GSM1228941"
"GSE50774"t"GSE50774:0000000:07"t"GSM1228948"t"GSM1228941"
"GSE50774"t"GSE50774:0000000:08"t"GSM1228949"t"GSM1228941"
"GSE50774"t"GSE50774:0000000:09"t"GSM1228950"t"GSM1228941"
"GSE50774"t"GSE50774:0000000:10"t"GSM1228951"t"GSM1228941"
"GSE50774"t"GSE50774:0000000:11"t"GSM1228952"t"GSM1228941"
"GSE50774"t"GSE50774:0000000:12"t"GSM1228953"t"GSM1228941"
"GSE50774"t"GSE50774:0000000:13"t"GSM1228954"t"GSM1228941"
"GSE50774"t"GSE50774:0000000:14"t"GSM1228955"t"GSM1228941"
"GSE50774"t"GSE50774:0000000:15"t"GSM1228956"t"GSM1228941"
"GSE50774"t"GSE50774:0000000:16"t"GSM1228957"t"GSM1228941"
"GSE50774"t"GSE50774:0000000:17"t"GSM1228958"t"GSM1228941"
"GSE50774"t"GSE50774:0000000:18"t"GSM1228959"t"GSM1228941"
"GSE50774"t"GSE50774:0000000:19"t"GSM1228960"t"GSM1228941"
"GSE50774"t"GSE50774:0000000:20"t"GSM1228961"t"GSM1228941"
"GSE50811"t"GSE50811:01:1"t"GSM1229995;GSM1229996;GSM1229997;GSM1230075;GSM1230076;GSM1230077"t"GSM1229992;GSM1229993;GSM1229994;GSM1230072;GSM1230073;GSM1230074"
"GSE50811"t"GSE50811:01:2"t"GSM1229998;GSM1229999;GSM1230000;GSM1230078;GSM1230079;GSM1230080"t"GSM1229992;GSM1229993;GSM1229994;GSM1230072;GSM1230073;GSM1230074"
"GSE50811"t"GSE50811:02:1"t"GSM1230004;GSM1230005;GSM1230006;GSM1230164;GSM1230165;GSM1230166"t"GSM1230001;GSM1230002;GSM1230003;GSM1230161;GSM1230162;GSM1230163"
"GSE50811"t"GSE50811:02:2"t"GSM1230007;GSM1230008;GSM1230009;GSM1230167;GSM1230168;GSM1230169"t"GSM1230001;GSM1230002;GSM1230003;GSM1230161;GSM1230162;GSM1230163"
"GSE50811"t"GSE50811:03:1"t"GSM1230013;GSM1230014;GSM1230015"t"GSM1230010;GSM1230011;GSM1230012"
"GSE50811"t"GSE50811:03:2"t"GSM1230016;GSM1230017;GSM1230018"t"GSM1230010;GSM1230011;GSM1230012"
"GSE50811"t"GSE50811:04:1"t"GSM1230022;GSM1230023;GSM1230024"t"GSM1230019;GSM1230020;GSM1230021"
"GSE50811"t"GSE50811:04:2"t"GSM1230025;GSM1230026;GSM1230027"t"GSM1230019;GSM1230020;GSM1230021"
"GSE50811"t"GSE50811:05:1"t"GSM1230031;GSM1230032;GSM1230033"t"GSM1230028;GSM1230029;GSM1230030"
"GSE50811"t"GSE50811:05:2"t"GSM1230034;GSM1230035;GSM1230036"t"GSM1230028;GSM1230029;GSM1230030"
"GSE50811"t"GSE50811:06:1"t"GSM1230039;GSM1230040;GSM1230041"t"GSM1230037;GSM1230038"
"GSE50811"t"GSE50811:06:2"t"GSM1230042;GSM1230043;GSM1230044"t"GSM1230037;GSM1230038"
"GSE50811"t"GSE50811:07:1"t"GSM1230048;GSM1230049;GSM1230050"t"GSM1230045;GSM1230046;GSM1230047"
"GSE50811"t"GSE50811:07:2"t"GSM1230051;GSM1230052;GSM1230053"t"GSM1230045;GSM1230046;GSM1230047"
"GSE50811"t"GSE50811:08:1"t"GSM1230057;GSM1230058;GSM1230059"t"GSM1230054;GSM1230055;GSM1230056"
"GSE50811"t"GSE50811:08:2"t"GSM1230060;GSM1230061;GSM1230062"t"GSM1230054;GSM1230055;GSM1230056"
"GSE50811"t"GSE50811:09:1"t"GSM1230066;GSM1230067;GSM1230068"t"GSM1230063;GSM1230064;GSM1230065"
"GSE50811"t"GSE50811:09:2"t"GSM1230069;GSM1230070;GSM1230071"t"GSM1230063;GSM1230064;GSM1230065"
"GSE50811"t"GSE50811:11:1"t"GSM1230084;GSM1230085;GSM1230086"t"GSM1230081;GSM1230082;GSM1230083"
"GSE50811"t"GSE50811:11:2"t"GSM1230087;GSM1230088;GSM1230089"t"GSM1230081;GSM1230082;GSM1230083"
"GSE50811"t"GSE50811:12:1"t"GSM1230093;GSM1230094;GSM1230095"t"GSM1230090;GSM1230091;GSM1230092"
"GSE50811"t"GSE50811:12:2"t"GSM1230096;GSM1230097;GSM1230098"t"GSM1230090;GSM1230091;GSM1230092"
"GSE50811"t"GSE50811:13:1"t"GSM1230102;GSM1230103;GSM1230104"t"GSM1230099;GSM1230100;GSM1230101"
"GSE50811"t"GSE50811:13:2"t"GSM1230105;GSM1230106;GSM1230107"t"GSM1230099;GSM1230100;GSM1230101"
"GSE50811"t"GSE50811:14:1"t"GSM1230111;GSM1230112;GSM1230113"t"GSM1230108;GSM1230109;GSM1230110"
"GSE50811"t"GSE50811:14:2"t"GSM1230114;GSM1230115;GSM1230116"t"GSM1230108;GSM1230109;GSM1230110"
"GSE50811"t"GSE50811:15:1"t"GSM1230120;GSM1230121;GSM1230122"t"GSM1230117;GSM1230118;GSM1230119"
"GSE50811"t"GSE50811:15:2"t"GSM1230123;GSM1230124;GSM1230125"t"GSM1230117;GSM1230118;GSM1230119"
"GSE50811"t"GSE50811:16:1"t"GSM1230128;GSM1230129;GSM1230130"t"GSM1230126;GSM1230127"
"GSE50811"t"GSE50811:16:2"t"GSM1230131;GSM1230132;GSM1230133"t"GSM1230126;GSM1230127"
"GSE50811"t"GSE50811:17:1"t"GSM1230137;GSM1230138;GSM1230139"t"GSM1230134;GSM1230135;GSM1230136"
"GSE50811"t"GSE50811:17:2"t"GSM1230140;GSM1230141;GSM1230142"t"GSM1230134;GSM1230135;GSM1230136"
"GSE50811"t"GSE50811:18:1"t"GSM1230146;GSM1230147;GSM1230148"t"GSM1230143;GSM1230144;GSM1230145"
"GSE50811"t"GSE50811:18:2"t"GSM1230149;GSM1230150;GSM1230151"t"GSM1230143;GSM1230144;GSM1230145"
"GSE50811"t"GSE50811:19:1"t"GSM1230155;GSM1230156;GSM1230157"t"GSM1230152;GSM1230153;GSM1230154"
"GSE50811"t"GSE50811:19:2"t"GSM1230158;GSM1230159;GSM1230160"t"GSM1230152;GSM1230153;GSM1230154"
"GSE50811"t"GSE50811:21:1"t"GSM1230173;GSM1230174;GSM1230175"t"GSM1230170;GSM1230171;GSM1230172"
"GSE50811"t"GSE50811:21:2"t"GSM1230176;GSM1230177;GSM1230178"t"GSM1230170;GSM1230171;GSM1230172"
"GSE50811"t"GSE50811:22:1"t"GSM1230182;GSM1230183;GSM1230184"t"GSM1230179;GSM1230180;GSM1230181"
"GSE50811"t"GSE50811:22:2"t"GSM1230185;GSM1230186;GSM1230187"t"GSM1230179;GSM1230180;GSM1230181"
"GSE50811"t"GSE50811:23:1"t"GSM1230191;GSM1230192;GSM1230193"t"GSM1230188;GSM1230189;GSM1230190"
"GSE50811"t"GSE50811:23:2"t"GSM1230194;GSM1230195;GSM1230196"t"GSM1230188;GSM1230189;GSM1230190"
"GSE50811"t"GSE50811:24:1"t"GSM1230200;GSM1230201;GSM1230202"t"GSM1230197;GSM1230198;GSM1230199"
"GSE50811"t"GSE50811:24:2"t"GSM1230203;GSM1230204;GSM1230205"t"GSM1230197;GSM1230198;GSM1230199"
"GSE50811"t"GSE50811:25:1"t"GSM1230209;GSM1230210;GSM1230211"t"GSM1230206;GSM1230207;GSM1230208"
"GSE50811"t"GSE50811:25:2"t"GSM1230212;GSM1230213;GSM1230214"t"GSM1230206;GSM1230207;GSM1230208"
"GSE50811"t"GSE50811:26:1"t"GSM1230218;GSM1230219;GSM1230220"t"GSM1230215;GSM1230216;GSM1230217"
"GSE50811"t"GSE50811:26:2"t"GSM1230221;GSM1230222;GSM1230223"t"GSM1230215;GSM1230216;GSM1230217"
"GSE50811"t"GSE50811:27:1"t"GSM1230227;GSM1230228;GSM1230229"t"GSM1230224;GSM1230225;GSM1230226"
"GSE50811"t"GSE50811:27:2"t"GSM1230230;GSM1230231;GSM1230232"t"GSM1230224;GSM1230225;GSM1230226"
"GSE50830"t"GSE50830:01:1"t"GSM1230536;GSM1230537;GSM1230538;GSM1230616;GSM1230617;GSM1230618"t"GSM1230533;GSM1230534;GSM1230535;GSM1230613;GSM1230614;GSM1230615"
"GSE50830"t"GSE50830:01:2"t"GSM1230539;GSM1230540;GSM1230541;GSM1230619;GSM1230620;GSM1230621"t"GSM1230533;GSM1230534;GSM1230535;GSM1230613;GSM1230614;GSM1230615"
"GSE50830"t"GSE50830:02:1"t"GSM1230545;GSM1230546;GSM1230547"t"GSM1230542;GSM1230543;GSM1230544"
"GSE50830"t"GSE50830:02:2"t"GSM1230548;GSM1230549;GSM1230550"t"GSM1230542;GSM1230543;GSM1230544"
"GSE50830"t"GSE50830:03:1"t"GSM1230554;GSM1230555;GSM1230556"t"GSM1230551;GSM1230552;GSM1230553"
"GSE50830"t"GSE50830:03:2"t"GSM1230557;GSM1230558;GSM1230559"t"GSM1230551;GSM1230552;GSM1230553"
"GSE50830"t"GSE50830:04:1"t"GSM1230563;GSM1230564;GSM1230565"t"GSM1230560;GSM1230561;GSM1230562"
"GSE50830"t"GSE50830:04:2"t"GSM1230566;GSM1230567;GSM1230568"t"GSM1230560;GSM1230561;GSM1230562"
"GSE50830"t"GSE50830:05:1"t"GSM1230571;GSM1230572;GSM1230573"t"GSM1230569;GSM1230570"
"GSE50830"t"GSE50830:05:2"t"GSM1230574;GSM1230575;GSM1230576"t"GSM1230569;GSM1230570"
"GSE50830"t"GSE50830:06:1"t"GSM1230580;GSM1230581;GSM1230582"t"GSM1230577;GSM1230578;GSM1230579"
"GSE50830"t"GSE50830:06:2"t"GSM1230583;GSM1230584;GSM1230585"t"GSM1230577;GSM1230578;GSM1230579"
"GSE50830"t"GSE50830:07:1"t"GSM1230589;GSM1230590;GSM1230591"t"GSM1230586;GSM1230587;GSM1230588"
"GSE50830"t"GSE50830:07:2"t"GSM1230592;GSM1230593;GSM1230594"t"GSM1230586;GSM1230587;GSM1230588"
"GSE50830"t"GSE50830:08:1"t"GSM1230598;GSM1230599;GSM1230600"t"GSM1230595;GSM1230596;GSM1230597"
"GSE50830"t"GSE50830:08:2"t"GSM1230601;GSM1230602;GSM1230603"t"GSM1230595;GSM1230596;GSM1230597"
"GSE50830"t"GSE50830:09:1"t"GSM1230607;GSM1230608;GSM1230609"t"GSM1230604;GSM1230605;GSM1230606"
"GSE50830"t"GSE50830:09:2"t"GSM1230610;GSM1230611;GSM1230612"t"GSM1230604;GSM1230605;GSM1230606"
"GSE50830"t"GSE50830:11:1"t"GSM1230624;GSM1230625;GSM1230626"t"GSM1230622;GSM1230623"
"GSE50830"t"GSE50830:11:2"t"GSM1230627;GSM1230628;GSM1230629"t"GSM1230622;GSM1230623"
"GSE50830"t"GSE50830:12:1"t"GSM1230633;GSM1230634;GSM1230635"t"GSM1230630;GSM1230631;GSM1230632"
"GSE50830"t"GSE50830:12:2"t"GSM1230636;GSM1230637;GSM1230638"t"GSM1230630;GSM1230631;GSM1230632"
"GSE50830"t"GSE50830:13:1"t"GSM1230642;GSM1230643;GSM1230644"t"GSM1230639;GSM1230640;GSM1230641"
"GSE50830"t"GSE50830:13:2"t"GSM1230645;GSM1230646;GSM1230647"t"GSM1230639;GSM1230640;GSM1230641"
"GSE50830"t"GSE50830:14:1"t"GSM1230651;GSM1230652;GSM1230653"t"GSM1230648;GSM1230649;GSM1230650"
"GSE50830"t"GSE50830:14:2"t"GSM1230654;GSM1230655;GSM1230656"t"GSM1230648;GSM1230649;GSM1230650"
"GSE50830"t"GSE50830:15:1"t"GSM1230660;GSM1230661;GSM1230662"t"GSM1230657;GSM1230658;GSM1230659"
"GSE50830"t"GSE50830:15:2"t"GSM1230663;GSM1230664;GSM1230665"t"GSM1230657;GSM1230658;GSM1230659"
"GSE50830"t"GSE50830:16:1"t"GSM1230669;GSM1230670"t"GSM1230666;GSM1230667;GSM1230668"
"GSE50830"t"GSE50830:16:2"t"GSM1230671;GSM1230672;GSM1230673"t"GSM1230666;GSM1230667;GSM1230668"
"GSE50830"t"GSE50830:17:1"t"GSM1230677;GSM1230678;GSM1230679"t"GSM1230674;GSM1230675;GSM1230676"
"GSE50830"t"GSE50830:17:2"t"GSM1230680;GSM1230681;GSM1230682"t"GSM1230674;GSM1230675;GSM1230676"
"GSE50830"t"GSE50830:18:1"t"GSM1230686;GSM1230687;GSM1230688"t"GSM1230683;GSM1230684;GSM1230685"
"GSE50830"t"GSE50830:18:2"t"GSM1230689;GSM1230690;GSM1230691"t"GSM1230683;GSM1230684;GSM1230685"
"GSE50830"t"GSE50830:19:1"t"GSM1230695;GSM1230696;GSM1230697"t"GSM1230692;GSM1230693;GSM1230694"
"GSE50830"t"GSE50830:19:2"t"GSM1230698;GSM1230699;GSM1230700"t"GSM1230692;GSM1230693;GSM1230694"
"GSE50831"t"GSE50831:01:1"t"GSM1230704;GSM1230705;GSM1230706;GSM1230785;GSM1230786;GSM1230787"t"GSM1230701;GSM1230702;GSM1230703;GSM1230782;GSM1230783;GSM1230784"
"GSE50831"t"GSE50831:01:2"t"GSM1230707;GSM1230708;GSM1230709;GSM1230788;GSM1230789;GSM1230790"t"GSM1230701;GSM1230702;GSM1230703;GSM1230782;GSM1230783;GSM1230784"
"GSE50831"t"GSE50831:02:1"t"GSM1230713;GSM1230714;GSM1230715;GSM1230875;GSM1230876;GSM1230877"t"GSM1230710;GSM1230711;GSM1230712;GSM1230872;GSM1230873;GSM1230874"
"GSE50831"t"GSE50831:02:2"t"GSM1230716;GSM1230717;GSM1230718;GSM1230878;GSM1230879;GSM1230880"t"GSM1230710;GSM1230711;GSM1230712;GSM1230872;GSM1230873;GSM1230874"
"GSE50831"t"GSE50831:03:1"t"GSM1230722;GSM1230723;GSM1230724"t"GSM1230719;GSM1230720;GSM1230721"
"GSE50831"t"GSE50831:03:2"t"GSM1230725;GSM1230726;GSM1230727"t"GSM1230719;GSM1230720;GSM1230721"
"GSE50831"t"GSE50831:04:1"t"GSM1230731;GSM1230732;GSM1230733"t"GSM1230728;GSM1230729;GSM1230730"
"GSE50831"t"GSE50831:04:2"t"GSM1230734;GSM1230735;GSM1230736"t"GSM1230728;GSM1230729;GSM1230730"
"GSE50831"t"GSE50831:05:1"t"GSM1230740;GSM1230741;GSM1230742"t"GSM1230737;GSM1230738;GSM1230739"
"GSE50831"t"GSE50831:05:2"t"GSM1230743;GSM1230744;GSM1230745"t"GSM1230737;GSM1230738;GSM1230739"
"GSE50831"t"GSE50831:06:1"t"GSM1230749;GSM1230750;GSM1230751"t"GSM1230746;GSM1230747;GSM1230748"
"GSE50831"t"GSE50831:06:2"t"GSM1230752;GSM1230753;GSM1230754"t"GSM1230746;GSM1230747;GSM1230748"
"GSE50831"t"GSE50831:07:1"t"GSM1230758;GSM1230759;GSM1230760"t"GSM1230755;GSM1230756;GSM1230757"
"GSE50831"t"GSE50831:07:2"t"GSM1230761;GSM1230762;GSM1230763"t"GSM1230755;GSM1230756;GSM1230757"
"GSE50831"t"GSE50831:08:1"t"GSM1230767;GSM1230768;GSM1230769"t"GSM1230764;GSM1230765;GSM1230766"
"GSE50831"t"GSE50831:08:2"t"GSM1230770;GSM1230771;GSM1230772"t"GSM1230764;GSM1230765;GSM1230766"
"GSE50831"t"GSE50831:09:1"t"GSM1230776;GSM1230777;GSM1230778"t"GSM1230773;GSM1230774;GSM1230775"
"GSE50831"t"GSE50831:09:2"t"GSM1230779;GSM1230780;GSM1230781"t"GSM1230773;GSM1230774;GSM1230775"
"GSE50831"t"GSE50831:11:1"t"GSM1230794;GSM1230795;GSM1230796"t"GSM1230791;GSM1230792;GSM1230793"
"GSE50831"t"GSE50831:11:2"t"GSM1230797;GSM1230798;GSM1230799"t"GSM1230791;GSM1230792;GSM1230793"
"GSE50831"t"GSE50831:12:1"t"GSM1230803;GSM1230804;GSM1230805"t"GSM1230800;GSM1230801;GSM1230802"
"GSE50831"t"GSE50831:12:2"t"GSM1230806;GSM1230807;GSM1230808"t"GSM1230800;GSM1230801;GSM1230802"
"GSE50831"t"GSE50831:13:1"t"GSM1230812;GSM1230813;GSM1230814"t"GSM1230809;GSM1230810;GSM1230811"
"GSE50831"t"GSE50831:13:2"t"GSM1230815;GSM1230816;GSM1230817"t"GSM1230809;GSM1230810;GSM1230811"
"GSE50831"t"GSE50831:14:1"t"GSM1230821;GSM1230822;GSM1230823"t"GSM1230818;GSM1230819;GSM1230820"
"GSE50831"t"GSE50831:14:2"t"GSM1230824;GSM1230825;GSM1230826"t"GSM1230818;GSM1230819;GSM1230820"
"GSE50831"t"GSE50831:15:1"t"GSM1230830;GSM1230831;GSM1230832"t"GSM1230827;GSM1230828;GSM1230829"
"GSE50831"t"GSE50831:15:2"t"GSM1230833;GSM1230834;GSM1230835"t"GSM1230827;GSM1230828;GSM1230829"
"GSE50831"t"GSE50831:16:1"t"GSM1230839;GSM1230840;GSM1230841"t"GSM1230836;GSM1230837;GSM1230838"
"GSE50831"t"GSE50831:16:2"t"GSM1230842;GSM1230843;GSM1230844"t"GSM1230836;GSM1230837;GSM1230838"
"GSE50831"t"GSE50831:17:1"t"GSM1230848;GSM1230849;GSM1230850"t"GSM1230845;GSM1230846;GSM1230847"
"GSE50831"t"GSE50831:17:2"t"GSM1230851;GSM1230852;GSM1230853"t"GSM1230845;GSM1230846;GSM1230847"
"GSE50831"t"GSE50831:18:1"t"GSM1230857;GSM1230858;GSM1230859"t"GSM1230854;GSM1230855;GSM1230856"
"GSE50831"t"GSE50831:18:2"t"GSM1230860;GSM1230861;GSM1230862"t"GSM1230854;GSM1230855;GSM1230856"
"GSE50831"t"GSE50831:19:1"t"GSM1230866;GSM1230867;GSM1230868"t"GSM1230863;GSM1230864;GSM1230865"
"GSE50831"t"GSE50831:19:2"t"GSM1230869;GSM1230870;GSM1230871"t"GSM1230863;GSM1230864;GSM1230865"
"GSE50831"t"GSE50831:21:1"t"GSM1230884;GSM1230885;GSM1230886"t"GSM1230881;GSM1230882;GSM1230883"
"GSE50831"t"GSE50831:21:2"t"GSM1230887;GSM1230888;GSM1230889"t"GSM1230881;GSM1230882;GSM1230883"
"GSE50868"t"GSE50868:0000000:1"t"GSM1231384"t"GSM1231381;GSM1231382;GSM1231383"
"GSE50868"t"GSE50868:0000000:2"t"GSM1231385"t"GSM1231381;GSM1231382;GSM1231383"
"GSE50868"t"GSE50868:0000000:3"t"GSM1231386"t"GSM1231381;GSM1231382;GSM1231383"
"GSE50868"t"GSE50868:0000000:4"t"GSM1231387;GSM1231388"t"GSM1231381;GSM1231382;GSM1231383"
"GSE50868"t"GSE50868:0000000:5"t"GSM1231389"t"GSM1231381;GSM1231382;GSM1231383"
"GSE50868"t"GSE50868:0000000:6"t"GSM1231390"t"GSM1231381;GSM1231382;GSM1231383"
"GSE50868"t"GSE50868:0000000:7"t"GSM1231393;GSM1231394"t"GSM1231381;GSM1231382;GSM1231383"
"GSE50868"t"GSE50868:0000000:8"t"GSM1231395;GSM1231396;GSM1231397"t"GSM1231381;GSM1231382;GSM1231383"
"GSE50931"t"GSE50931:0000000:1"t"GSM1232655;GSM1232657"t"GSM1232654;GSM1232656"
"GSE50959"t"GSE50959:0000000:1"t"GSM1233305;GSM1233306"t"GSM1233304"
"GSE50959"t"GSE50959:0000000:2"t"GSM1233307;GSM1233308"t"GSM1233304"
"GSE51010"t"GSE51010:0000000:1"t"GSM1234784;GSM1234785;GSM1234786"t"GSM1234779;GSM1234780;GSM1234781;GSM1234782;GSM1234783"
"GSE51024"t"GSE51024:01:1"t"GSM1235017;GSM1235035"t"GSM1235016;GSM1235034"
"GSE51024"t"GSE51024:02:1"t"GSM1235019;GSM1235055"t"GSM1235018;GSM1235054"
"GSE51024"t"GSE51024:03:1"t"GSM1235021;GSM1235079"t"GSM1235020;GSM1235078"
"GSE51024"t"GSE51024:04:1"t"GSM1235023;GSM1235109"t"GSM1235022;GSM1235108"
"GSE51024"t"GSE51024:05:1"t"GSM1235025;GSM1235098"t"GSM1235024"
"GSE51024"t"GSE51024:06:1"t"GSM1235027"t"GSM1235026"
"GSE51024"t"GSE51024:07:1"t"GSM1235029"t"GSM1235028"
"GSE51024"t"GSE51024:08:1"t"GSM1235031"t"GSM1235030"
"GSE51024"t"GSE51024:09:1"t"GSM1235033"t"GSM1235032"
"GSE51024"t"GSE51024:11:1"t"GSM1235037"t"GSM1235036"
"GSE51024"t"GSE51024:12:1"t"GSM1235039"t"GSM1235038"
"GSE51024"t"GSE51024:13:1"t"GSM1235041"t"GSM1235040"
"GSE51024"t"GSE51024:14:1"t"GSM1235043"t"GSM1235042"
"GSE51024"t"GSE51024:15:1"t"GSM1235045"t"GSM1235044"
"GSE51024"t"GSE51024:16:1"t"GSM1235047"t"GSM1235046"
"GSE51024"t"GSE51024:17:1"t"GSM1235049"t"GSM1235048"
"GSE51024"t"GSE51024:18:1"t"GSM1235051"t"GSM1235050"
"GSE51024"t"GSE51024:19:1"t"GSM1235053"t"GSM1235052"
"GSE51024"t"GSE51024:21:1"t"GSM1235057"t"GSM1235056"
"GSE51024"t"GSE51024:22:1"t"GSM1235059"t"GSM1235058"
"GSE51024"t"GSE51024:23:1"t"GSM1235061"t"GSM1235060"
"GSE51024"t"GSE51024:24:1"t"GSM1235065"t"GSM1235064"
"GSE51024"t"GSE51024:25:1"t"GSM1235067"t"GSM1235066"
"GSE51024"t"GSE51024:26:1"t"GSM1235069"t"GSM1235068"
"GSE51024"t"GSE51024:27:1"t"GSM1235071"t"GSM1235070"
"GSE51024"t"GSE51024:28:1"t"GSM1235073"t"GSM1235072"
"GSE51024"t"GSE51024:29:1"t"GSM1235077"t"GSM1235076"
"GSE51024"t"GSE51024:31:1"t"GSM1235081"t"GSM1235080"
"GSE51024"t"GSE51024:32:1"t"GSM1235083"t"GSM1235082"
"GSE51024"t"GSE51024:33:1"t"GSM1235087"t"GSM1235086"
"GSE51024"t"GSE51024:34:1"t"GSM1235089"t"GSM1235088"
"GSE51024"t"GSE51024:35:1"t"GSM1235091"t"GSM1235090"
"GSE51024"t"GSE51024:36:1"t"GSM1235101"t"GSM1235100"
"GSE51024"t"GSE51024:37:1"t"GSM1235103"t"GSM1235102"
"GSE51024"t"GSE51024:38:1"t"GSM1235105"t"GSM1235104"
"GSE51024"t"GSE51024:39:1"t"GSM1235107"t"GSM1235106"
"GSE51024"t"GSE51024:41:1"t"GSM1235111"t"GSM1235110"
"GSE51056"t"GSE51056:0000000:1"t"GSM1236638;GSM1236639"t"GSM1236640;GSM1236641"
"GSE51105"t"GSE51105:0000000:01"t"GSM1238812"t"GSM1238811"
"GSE51105"t"GSE51105:0000000:02"t"GSM1238813"t"GSM1238811"
"GSE51105"t"GSE51105:0000000:03"t"GSM1238814"t"GSM1238811"
"GSE51105"t"GSE51105:0000000:04"t"GSM1238815"t"GSM1238811"
"GSE51105"t"GSE51105:0000000:05"t"GSM1238816"t"GSM1238811"
"GSE51105"t"GSE51105:0000000:06"t"GSM1238817"t"GSM1238811"
"GSE51105"t"GSE51105:0000000:07"t"GSM1238818"t"GSM1238811"
"GSE51105"t"GSE51105:0000000:08"t"GSM1238819"t"GSM1238811"
"GSE51105"t"GSE51105:0000000:09"t"GSM1238820"t"GSM1238811"
"GSE51105"t"GSE51105:0000000:10"t"GSM1238821"t"GSM1238811"
"GSE51105"t"GSE51105:0000000:11"t"GSM1238822"t"GSM1238811"
"GSE51105"t"GSE51105:0000000:12"t"GSM1238823"t"GSM1238811"
"GSE51105"t"GSE51105:0000000:13"t"GSM1238824"t"GSM1238811"
"GSE51105"t"GSE51105:0000000:14"t"GSM1238825"t"GSM1238811"
"GSE51105"t"GSE51105:0000000:15"t"GSM1238826"t"GSM1238811"
"GSE51105"t"GSE51105:0000000:16"t"GSM1238827"t"GSM1238811"
"GSE51105"t"GSE51105:0000000:17"t"GSM1238828"t"GSM1238811"
"GSE51105"t"GSE51105:0000000:18"t"GSM1238829"t"GSM1238811"
"GSE51105"t"GSE51105:0000000:19"t"GSM1238830"t"GSM1238811"
"GSE51105"t"GSE51105:0000000:20"t"GSM1238831"t"GSM1238811"
"GSE51105"t"GSE51105:0000000:21"t"GSM1238832"t"GSM1238811"
"GSE51105"t"GSE51105:0000000:22"t"GSM1238833"t"GSM1238811"
"GSE51105"t"GSE51105:0000000:23"t"GSM1238834"t"GSM1238811"
"GSE51105"t"GSE51105:0000000:24"t"GSM1238835"t"GSM1238811"
"GSE51105"t"GSE51105:0000000:25"t"GSM1238836"t"GSM1238811"
"GSE51105"t"GSE51105:0000000:26"t"GSM1238837"t"GSM1238811"
"GSE51105"t"GSE51105:0000000:27"t"GSM1238838"t"GSM1238811"
"GSE51105"t"GSE51105:0000000:28"t"GSM1238839"t"GSM1238811"
"GSE51105"t"GSE51105:0000000:29"t"GSM1238840"t"GSM1238811"
"GSE51105"t"GSE51105:0000000:30"t"GSM1238841"t"GSM1238811"
"GSE51105"t"GSE51105:0000000:31"t"GSM1238842"t"GSM1238811"
"GSE51105"t"GSE51105:0000000:32"t"GSM1238843"t"GSM1238811"
"GSE51105"t"GSE51105:0000000:33"t"GSM1238844"t"GSM1238811"
"GSE51105"t"GSE51105:0000000:34"t"GSM1238845"t"GSM1238811"
"GSE51105"t"GSE51105:0000000:35"t"GSM1238846"t"GSM1238811"
"GSE51105"t"GSE51105:0000000:36"t"GSM1238847"t"GSM1238811"
"GSE51105"t"GSE51105:0000000:37"t"GSM1238848"t"GSM1238811"
"GSE51105"t"GSE51105:0000000:38"t"GSM1238849"t"GSM1238811"
"GSE51105"t"GSE51105:0000000:39"t"GSM1238850"t"GSM1238811"
"GSE51105"t"GSE51105:0000000:40"t"GSM1238851"t"GSM1238811"
"GSE51105"t"GSE51105:0000000:41"t"GSM1238852"t"GSM1238811"
"GSE51105"t"GSE51105:0000000:42"t"GSM1238853"t"GSM1238811"
"GSE51105"t"GSE51105:0000000:43"t"GSM1238854"t"GSM1238811"
"GSE51105"t"GSE51105:0000000:44"t"GSM1238855"t"GSM1238811"
"GSE51105"t"GSE51105:0000000:45"t"GSM1238856"t"GSM1238811"
"GSE51105"t"GSE51105:0000000:46"t"GSM1238857"t"GSM1238811"
"GSE51105"t"GSE51105:0000000:47"t"GSM1238858"t"GSM1238811"
"GSE51105"t"GSE51105:0000000:48"t"GSM1238859"t"GSM1238811"
"GSE51105"t"GSE51105:0000000:49"t"GSM1238860"t"GSM1238811"
"GSE51105"t"GSE51105:0000000:50"t"GSM1238861"t"GSM1238811"
"GSE51105"t"GSE51105:0000000:51"t"GSM1238862"t"GSM1238811"
"GSE51105"t"GSE51105:0000000:52"t"GSM1238863"t"GSM1238811"
"GSE51105"t"GSE51105:0000000:53"t"GSM1238864"t"GSM1238811"
"GSE51105"t"GSE51105:0000000:54"t"GSM1238865"t"GSM1238811"
"GSE51105"t"GSE51105:0000000:55"t"GSM1238866"t"GSM1238811"
"GSE51105"t"GSE51105:0000000:56"t"GSM1238867"t"GSM1238811"
"GSE51105"t"GSE51105:0000000:57"t"GSM1238868"t"GSM1238811"
"GSE51105"t"GSE51105:0000000:58"t"GSM1238869"t"GSM1238811"
"GSE51105"t"GSE51105:0000000:59"t"GSM1238870"t"GSM1238811"
"GSE51105"t"GSE51105:0000000:60"t"GSM1238871"t"GSM1238811"
"GSE51105"t"GSE51105:0000000:61"t"GSM1238872"t"GSM1238811"
"GSE51105"t"GSE51105:0000000:62"t"GSM1238873"t"GSM1238811"
"GSE51105"t"GSE51105:0000000:63"t"GSM1238874"t"GSM1238811"
"GSE51105"t"GSE51105:0000000:64"t"GSM1238875"t"GSM1238811"
"GSE51105"t"GSE51105:0000000:65"t"GSM1238876"t"GSM1238811"
"GSE51105"t"GSE51105:0000000:66"t"GSM1238877"t"GSM1238811"
"GSE51105"t"GSE51105:0000000:67"t"GSM1238878"t"GSM1238811"
"GSE51105"t"GSE51105:0000000:68"t"GSM1238879"t"GSM1238811"
"GSE51105"t"GSE51105:0000000:69"t"GSM1238880"t"GSM1238811"
"GSE51105"t"GSE51105:0000000:70"t"GSM1238881"t"GSM1238811"
"GSE51105"t"GSE51105:0000000:71"t"GSM1238882"t"GSM1238811"
"GSE51105"t"GSE51105:0000000:72"t"GSM1238883"t"GSM1238811"
"GSE51105"t"GSE51105:0000000:73"t"GSM1238884"t"GSM1238811"
"GSE51105"t"GSE51105:0000000:74"t"GSM1238885"t"GSM1238811"
"GSE51105"t"GSE51105:0000000:75"t"GSM1238886"t"GSM1238811"
"GSE51105"t"GSE51105:0000000:76"t"GSM1238887"t"GSM1238811"
"GSE51105"t"GSE51105:0000000:77"t"GSM1238888"t"GSM1238811"
"GSE51105"t"GSE51105:0000000:78"t"GSM1238889"t"GSM1238811"
"GSE51105"t"GSE51105:0000000:79"t"GSM1238890"t"GSM1238811"
"GSE51105"t"GSE51105:0000000:80"t"GSM1238891"t"GSM1238811"
"GSE51105"t"GSE51105:0000000:81"t"GSM1238892"t"GSM1238811"
"GSE51105"t"GSE51105:0000000:82"t"GSM1238893"t"GSM1238811"
"GSE51105"t"GSE51105:0000000:83"t"GSM1238894"t"GSM1238811"
"GSE51105"t"GSE51105:0000000:84"t"GSM1238895"t"GSM1238811"
"GSE51105"t"GSE51105:0000000:85"t"GSM1238896"t"GSM1238811"
"GSE51105"t"GSE51105:0000000:86"t"GSM1238897"t"GSM1238811"
"GSE51105"t"GSE51105:0000000:87"t"GSM1238898"t"GSM1238811"
"GSE51105"t"GSE51105:0000000:88"t"GSM1238899"t"GSM1238811"
"GSE51105"t"GSE51105:0000000:89"t"GSM1238900"t"GSM1238811"
"GSE51105"t"GSE51105:0000000:90"t"GSM1238901"t"GSM1238811"
"GSE51105"t"GSE51105:0000000:91"t"GSM1238902"t"GSM1238811"
"GSE51105"t"GSE51105:0000000:92"t"GSM1238903"t"GSM1238811"
"GSE51105"t"GSE51105:0000000:93"t"GSM1238904"t"GSM1238811"
"GSE51212"t"GSE51212:1:1"t"GSM1240548;GSM1240549;GSM1240550"t"GSM1240545;GSM1240546;GSM1240547"
"GSE51212"t"GSE51212:1:2"t"GSM1240551;GSM1240552;GSM1240553"t"GSM1240545;GSM1240546;GSM1240547"
"GSE51212"t"GSE51212:1:3"t"GSM1240554;GSM1240555;GSM1240556"t"GSM1240545;GSM1240546;GSM1240547"
"GSE51212"t"GSE51212:3:1"t"GSM1240560"t"GSM1240557"
"GSE51231"t"GSE51231:0000000:1"t"GSM1240795"t"GSM1240794"
"GSE51231"t"GSE51231:0000000:2"t"GSM1240796"t"GSM1240794"
"GSE51232"t"GSE51232:0000000:1"t"GSM1240799;GSM1240805"t"GSM1240797;GSM1240798;GSM1240802"
"GSE51232"t"GSE51232:0000000:2"t"GSM1240800;GSM1240801;GSM1240803;GSM1240806"t"GSM1240797;GSM1240798;GSM1240802"
"GSE51232"t"GSE51232:0000000:3"t"GSM1240804"t"GSM1240797;GSM1240798;GSM1240802"
"GSE51382"t"GSE51382:1:1"t"GSM1244379"t"GSM1244380"
"GSE51382"t"GSE51382:2:1"t"GSM1244381"t"GSM1244382"
"GSE51382"t"GSE51382:3:1"t"GSM1244384"t"GSM1244383"
"GSE51382"t"GSE51382:4:1"t"GSM1244386"t"GSM1244385"
"GSE51382"t"GSE51382:5:1"t"GSM1244388"t"GSM1244387"
"GSE51382"t"GSE51382:6:1"t"GSM1244389"t"GSM1244390"
"GSE51382"t"GSE51382:7:1"t"GSM1244391"t"GSM1244392"
"GSE51382"t"GSE51382:8:1"t"GSM1244393"t"GSM1244394"
"GSE51450"t"GSE51450:0000000:01"t"GSM1245976"t"GSM1245975"
"GSE51450"t"GSE51450:0000000:02"t"GSM1245977"t"GSM1245975"
"GSE51450"t"GSE51450:0000000:03"t"GSM1245978"t"GSM1245975"
"GSE51450"t"GSE51450:0000000:04"t"GSM1245979"t"GSM1245975"
"GSE51450"t"GSE51450:0000000:05"t"GSM1245980"t"GSM1245975"
"GSE51450"t"GSE51450:0000000:06"t"GSM1245981"t"GSM1245975"
"GSE51450"t"GSE51450:0000000:07"t"GSM1245982"t"GSM1245975"
"GSE51450"t"GSE51450:0000000:08"t"GSM1245983"t"GSM1245975"
"GSE51450"t"GSE51450:0000000:09"t"GSM1245984"t"GSM1245975"
"GSE51450"t"GSE51450:0000000:10"t"GSM1245985"t"GSM1245975"
"GSE51450"t"GSE51450:0000000:11"t"GSM1245986"t"GSM1245975"
"GSE51455"t"GSE51455:0000000:01"t"GSM1246012"t"GSM1246010;GSM1246011"
"GSE51455"t"GSE51455:0000000:02"t"GSM1246013"t"GSM1246010;GSM1246011"
"GSE51455"t"GSE51455:0000000:03"t"GSM1246014"t"GSM1246010;GSM1246011"
"GSE51455"t"GSE51455:0000000:04"t"GSM1246015"t"GSM1246010;GSM1246011"
"GSE51455"t"GSE51455:0000000:05"t"GSM1246016"t"GSM1246010;GSM1246011"
"GSE51455"t"GSE51455:0000000:06"t"GSM1246017"t"GSM1246010;GSM1246011"
"GSE51455"t"GSE51455:0000000:07"t"GSM1246018"t"GSM1246010;GSM1246011"
"GSE51455"t"GSE51455:0000000:08"t"GSM1246019"t"GSM1246010;GSM1246011"
"GSE51455"t"GSE51455:0000000:09"t"GSM1246020"t"GSM1246010;GSM1246011"
"GSE51455"t"GSE51455:0000000:10"t"GSM1246021"t"GSM1246010;GSM1246011"
"GSE51455"t"GSE51455:0000000:11"t"GSM1246022"t"GSM1246010;GSM1246011"
"GSE51484"t"GSE51484:0000000:1"t"GSM1246351"t"GSM1246350"
"GSE51524"t"GSE51524:0:1"t"GSM1246891;GSM1246892;GSM1246893"t"GSM1246885;GSM1246886;GSM1246887"
"GSE51524"t"GSE51524:1:1"t"GSM1246894;GSM1246895;GSM1246896"t"GSM1246888;GSM1246889;GSM1246890"
"GSE51524"t"GSE51524:2:1"t"GSM1246900;GSM1246901;GSM1246902"t"GSM1246897;GSM1246898;GSM1246899"
"GSE51651"t"GSE51651:0000000:1"t"GSM1250135;GSM1250136;GSM1250137"t"GSM1250138;GSM1250139;GSM1250140"
"GSE51704"t"GSE51704:1:1"t"GSM1250857;GSM1250858;GSM1250859"t"GSM1250854;GSM1250855;GSM1250856"
"GSE51704"t"GSE51704:1:2"t"GSM1250860;GSM1250861;GSM1250862"t"GSM1250854;GSM1250855;GSM1250856"
"GSE51704"t"GSE51704:2:1"t"GSM1250866;GSM1250867;GSM1250868"t"GSM1250863;GSM1250864;GSM1250865"
"GSE51704"t"GSE51704:2:2"t"GSM1250869;GSM1250870"t"GSM1250863;GSM1250864;GSM1250865"
"GSE51704"t"GSE51704:3:1"t"GSM1250875;GSM1250876;GSM1250877"t"GSM1250872;GSM1250873;GSM1250874"
"GSE51704"t"GSE51704:3:2"t"GSM1250871;GSM1250878;GSM1250879;GSM1250880"t"GSM1250872;GSM1250873;GSM1250874"
"GSE51704"t"GSE51704:4:1"t"GSM1250884;GSM1250885;GSM1250886"t"GSM1250881;GSM1250882;GSM1250883"
"GSE51704"t"GSE51704:4:2"t"GSM1250887;GSM1250888;GSM1250889"t"GSM1250881;GSM1250882;GSM1250883"
"GSE51717"t"GSE51717:1:1"t"GSM1251029"t"GSM1251032"
"GSE51717"t"GSE51717:1:2"t"GSM1251030"t"GSM1251032"
"GSE51717"t"GSE51717:1:3"t"GSM1251031"t"GSM1251032"
"GSE51717"t"GSE51717:2:1"t"GSM1251033"t"GSM1251036"
"GSE51717"t"GSE51717:2:2"t"GSM1251034"t"GSM1251036"
"GSE51717"t"GSE51717:2:3"t"GSM1251035"t"GSM1251036"
"GSE51835"t"GSE51835:01:1"t"GSM1253473;GSM1253491"t"GSM1253472;GSM1253490"
"GSE51835"t"GSE51835:02:1"t"GSM1253475"t"GSM1253474"
"GSE51835"t"GSE51835:03:1"t"GSM1253477"t"GSM1253476"
"GSE51835"t"GSE51835:04:1"t"GSM1253479"t"GSM1253478"
"GSE51835"t"GSE51835:05:1"t"GSM1253481"t"GSM1253480"
"GSE51835"t"GSE51835:06:1"t"GSM1253483"t"GSM1253482"
"GSE51835"t"GSE51835:07:1"t"GSM1253485"t"GSM1253484"
"GSE51835"t"GSE51835:08:1"t"GSM1253487"t"GSM1253486"
"GSE51835"t"GSE51835:09:1"t"GSM1253489"t"GSM1253488"
"GSE51835"t"GSE51835:11:1"t"GSM1253493"t"GSM1253492"
"GSE51835"t"GSE51835:12:1"t"GSM1253495"t"GSM1253494"
"GSE51875"t"GSE51875:0000000:1"t"GSM1254434"t"GSM1254435"
"GSE51981"t"GSE51981:0000000:1"t"GSM1256672;GSM1256674;GSM1256677;GSM1256682;GSM1256683;GSM1256684;GSM1256685;GSM1256686;GSM1256688;GSM1256689;GSM1256690;GSM1256691;GSM1256692;GSM1256693;GSM1256694;GSM1256698;GSM1256700;GSM1256705;GSM1256706;GSM1256708;GSM1256713;GSM1256715;GSM1256718;GSM1256774;GSM1256775;GSM1256776;GSM1256778"t"GSM1256720;GSM1256721;GSM1256722;GSM1256723;GSM1256724;GSM1256725;GSM1256726;GSM1256727;GSM1256728;GSM1256729;GSM1256730;GSM1256731;GSM1256732;GSM1256733;GSM1256734;GSM1256766;GSM1256767;GSM1256768;GSM1256769;GSM1256770;GSM1256771;GSM1256772;GSM1256784;GSM1256785;GSM1256786;GSM1256787;GSM1256788;GSM1256791;GSM1256793;GSM1256796;GSM1256797;GSM1256798;GSM1256799;GSM1256800"
"GSE51981"t"GSE51981:0000000:2"t"GSM1256653;GSM1256654;GSM1256655;GSM1256656;GSM1256657;GSM1256658;GSM1256659;GSM1256660;GSM1256661;GSM1256662;GSM1256663;GSM1256664;GSM1256665;GSM1256666;GSM1256667;GSM1256668;GSM1256669;GSM1256670;GSM1256671;GSM1256673;GSM1256675;GSM1256676;GSM1256678;GSM1256679;GSM1256680;GSM1256681;GSM1256687;GSM1256695;GSM1256697;GSM1256699;GSM1256701;GSM1256703;GSM1256704;GSM1256707;GSM1256709;GSM1256710;GSM1256711;GSM1256712;GSM1256714;GSM1256716;GSM1256717;GSM1256719;GSM1256773;GSM1256777;GSM1256779;GSM1256780;GSM1256781;GSM1256782"t"GSM1256720;GSM1256721;GSM1256722;GSM1256723;GSM1256724;GSM1256725;GSM1256726;GSM1256727;GSM1256728;GSM1256729;GSM1256730;GSM1256731;GSM1256732;GSM1256733;GSM1256734;GSM1256766;GSM1256767;GSM1256768;GSM1256769;GSM1256770;GSM1256771;GSM1256772;GSM1256784;GSM1256785;GSM1256786;GSM1256787;GSM1256788;GSM1256791;GSM1256793;GSM1256796;GSM1256797;GSM1256798;GSM1256799;GSM1256800"
"GSE51981"t"GSE51981:0000000:3"t"GSM1256735;GSM1256736;GSM1256737;GSM1256738;GSM1256739;GSM1256740;GSM1256741;GSM1256742;GSM1256743;GSM1256744;GSM1256745;GSM1256746;GSM1256747;GSM1256748;GSM1256749;GSM1256750;GSM1256751;GSM1256752;GSM1256753;GSM1256754;GSM1256755;GSM1256756;GSM1256757;GSM1256758;GSM1256759;GSM1256760;GSM1256761;GSM1256762;GSM1256763;GSM1256764;GSM1256765;GSM1256783;GSM1256789;GSM1256790;GSM1256792;GSM1256794;GSM1256795"t"GSM1256720;GSM1256721;GSM1256722;GSM1256723;GSM1256724;GSM1256725;GSM1256726;GSM1256727;GSM1256728;GSM1256729;GSM1256730;GSM1256731;GSM1256732;GSM1256733;GSM1256734;GSM1256766;GSM1256767;GSM1256768;GSM1256769;GSM1256770;GSM1256771;GSM1256772;GSM1256784;GSM1256785;GSM1256786;GSM1256787;GSM1256788;GSM1256791;GSM1256793;GSM1256796;GSM1256797;GSM1256798;GSM1256799;GSM1256800"
"GSE52087"t"GSE52087:0000000:1"t"GSM1259206;GSM1259207;GSM1259208;GSM1259209"t"GSM1259202;GSM1259203;GSM1259204;GSM1259205"
"GSE52087"t"GSE52087:0000000:2"t"GSM1259210;GSM1259211;GSM1259212;GSM1259213"t"GSM1259202;GSM1259203;GSM1259204;GSM1259205"
"GSE52139"t"GSE52139:1:1"t"GSM1260234"t"GSM1260235"
"GSE52139"t"GSE52139:2:1"t"GSM1260236"t"GSM1260237"
"GSE52139"t"GSE52139:3:1"t"GSM1260238"t"GSM1260239"
"GSE52139"t"GSE52139:4:1"t"GSM1260240"t"GSM1260241"
"GSE52139"t"GSE52139:5:1"t"GSM1260242"t"GSM1260243"
"GSE52139"t"GSE52139:6:1"t"GSM1260244"t"GSM1260245"
"GSE52139"t"GSE52139:7:1"t"GSM1260246"t"GSM1260247"
"GSE52139"t"GSE52139:8:1"t"GSM1260248"t"GSM1260249"
"GSE52171"t"GSE52171:0:1"t"GSM1260653;GSM1260655;GSM1260658"t"GSM1260654;GSM1260656;GSM1260657"
"GSE52315"t"GSE52315:0000000:1"t"GSM1262783;GSM1262786;GSM1262787"t"GSM1262782;GSM1262784;GSM1262785"
"GSE52322"t"GSE52322:0000000:01"t"GSM1263082"t"GSM1263081"
"GSE52322"t"GSE52322:0000000:02"t"GSM1263083"t"GSM1263081"
"GSE52322"t"GSE52322:0000000:03"t"GSM1263084"t"GSM1263081"
"GSE52322"t"GSE52322:0000000:04"t"GSM1263085"t"GSM1263081"
"GSE52322"t"GSE52322:0000000:05"t"GSM1263086"t"GSM1263081"
"GSE52322"t"GSE52322:0000000:06"t"GSM1263087"t"GSM1263081"
"GSE52322"t"GSE52322:0000000:07"t"GSM1263088"t"GSM1263081"
"GSE52322"t"GSE52322:0000000:08"t"GSM1263089"t"GSM1263081"
"GSE52322"t"GSE52322:0000000:09"t"GSM1263090"t"GSM1263081"
"GSE52322"t"GSE52322:0000000:10"t"GSM1263091"t"GSM1263081"
"GSE52322"t"GSE52322:0000000:11"t"GSM1263092"t"GSM1263081"
"GSE52322"t"GSE52322:0000000:12"t"GSM1263093"t"GSM1263081"
"GSE52322"t"GSE52322:0000000:13"t"GSM1263094"t"GSM1263081"
"GSE52322"t"GSE52322:0000000:14"t"GSM1263095"t"GSM1263081"
"GSE52322"t"GSE52322:0000000:15"t"GSM1263096"t"GSM1263081"
"GSE52322"t"GSE52322:0000000:16"t"GSM1263097"t"GSM1263081"
"GSE52322"t"GSE52322:0000000:17"t"GSM1263098"t"GSM1263081"
"GSE52322"t"GSE52322:0000000:18"t"GSM1263099"t"GSM1263081"
"GSE52322"t"GSE52322:0000000:19"t"GSM1263100"t"GSM1263081"
"GSE52322"t"GSE52322:0000000:20"t"GSM1263101"t"GSM1263081"
"GSE52322"t"GSE52322:0000000:21"t"GSM1263102"t"GSM1263081"
"GSE52322"t"GSE52322:0000000:22"t"GSM1263103"t"GSM1263081"
"GSE52322"t"GSE52322:0000000:23"t"GSM1263104"t"GSM1263081"
"GSE52322"t"GSE52322:0000000:24"t"GSM1263105"t"GSM1263081"
"GSE52322"t"GSE52322:0000000:25"t"GSM1263106"t"GSM1263081"
"GSE52322"t"GSE52322:0000000:26"t"GSM1263107"t"GSM1263081"
"GSE52322"t"GSE52322:0000000:27"t"GSM1263108"t"GSM1263081"
"GSE52322"t"GSE52322:0000000:28"t"GSM1263109"t"GSM1263081"
"GSE52322"t"GSE52322:0000000:29"t"GSM1263110"t"GSM1263081"
"GSE52322"t"GSE52322:0000000:30"t"GSM1263111"t"GSM1263081"
"GSE52322"t"GSE52322:0000000:31"t"GSM1263112"t"GSM1263081"
"GSE52322"t"GSE52322:0000000:32"t"GSM1263113"t"GSM1263081"
"GSE52322"t"GSE52322:0000000:33"t"GSM1263114"t"GSM1263081"
"GSE52322"t"GSE52322:0000000:34"t"GSM1263115"t"GSM1263081"
"GSE52322"t"GSE52322:0000000:35"t"GSM1263116"t"GSM1263081"
"GSE52322"t"GSE52322:0000000:36"t"GSM1263117"t"GSM1263081"
"GSE52361"t"GSE52361:1:1"t"GSM1263937"t"GSM1263936"
"GSE52361"t"GSE52361:1:2"t"GSM1263938"t"GSM1263936"
"GSE52361"t"GSE52361:1:3"t"GSM1263939"t"GSM1263936"
"GSE52361"t"GSE52361:2:1"t"GSM1263941"t"GSM1263940"
"GSE52361"t"GSE52361:2:2"t"GSM1263942"t"GSM1263940"
"GSE52361"t"GSE52361:2:3"t"GSM1263943"t"GSM1263940"
"GSE52361"t"GSE52361:3:1"t"GSM1263945"t"GSM1263944"
"GSE52361"t"GSE52361:3:2"t"GSM1263946"t"GSM1263944"
"GSE52361"t"GSE52361:3:3"t"GSM1263947"t"GSM1263944"
"GSE52553"t"GSE52553:0:1"t"GSM1269649;GSM1269651;GSM1269657;GSM1269659;GSM1269665;GSM1269667;GSM1269673;GSM1269675;GSM1269681;GSM1269683;GSM1269687;GSM1269689;GSM1269695;GSM1269697;GSM1269703;GSM1269705;GSM1269711;GSM1269713;GSM1269719;GSM1269725;GSM1269727"t"GSM1269648;GSM1269650;GSM1269656;GSM1269658;GSM1269664;GSM1269666;GSM1269672;GSM1269674;GSM1269680;GSM1269682;GSM1269686;GSM1269688;GSM1269694;GSM1269696;GSM1269702;GSM1269704;GSM1269710;GSM1269712;GSM1269718;GSM1269724;GSM1269726"
"GSE52553"t"GSE52553:1:1"t"GSM1269645;GSM1269647;GSM1269653;GSM1269655;GSM1269661;GSM1269663;GSM1269669;GSM1269671;GSM1269677;GSM1269679;GSM1269685;GSM1269691;GSM1269693;GSM1269699;GSM1269701;GSM1269707;GSM1269709;GSM1269715;GSM1269717;GSM1269721;GSM1269723"t"GSM1269644;GSM1269646;GSM1269652;GSM1269654;GSM1269660;GSM1269662;GSM1269668;GSM1269670;GSM1269676;GSM1269678;GSM1269684;GSM1269690;GSM1269692;GSM1269698;GSM1269700;GSM1269706;GSM1269708;GSM1269714;GSM1269716;GSM1269720;GSM1269722"
"GSE52651"t"GSE52651:0000000:1"t"GSM1273563;GSM1273564"t"GSM1273579;GSM1273580"
"GSE52651"t"GSE52651:0000000:2"t"GSM1273565;GSM1273566"t"GSM1273579;GSM1273580"
"GSE52651"t"GSE52651:0000000:3"t"GSM1273567;GSM1273568"t"GSM1273579;GSM1273580"
"GSE52651"t"GSE52651:0000000:4"t"GSM1273569;GSM1273570"t"GSM1273579;GSM1273580"
"GSE52651"t"GSE52651:0000000:5"t"GSM1273571;GSM1273572"t"GSM1273579;GSM1273580"
"GSE52651"t"GSE52651:0000000:6"t"GSM1273573;GSM1273574"t"GSM1273579;GSM1273580"
"GSE52651"t"GSE52651:0000000:7"t"GSM1273575;GSM1273576"t"GSM1273579;GSM1273580"
"GSE52651"t"GSE52651:0000000:8"t"GSM1273577;GSM1273578"t"GSM1273579;GSM1273580"
"GSE52651"t"GSE52651:0000000:9"t"GSM1273581;GSM1273582;GSM1273583"t"GSM1273579;GSM1273580"
"GSE52674"t"GSE52674:0000000:1"t"GSM1273924;GSM1273925"t"GSM1273928;GSM1273929"
"GSE52674"t"GSE52674:0000000:2"t"GSM1273926;GSM1273927"t"GSM1273928;GSM1273929"
"GSE52707"t"GSE52707:0000000:1"t"GSM1274400;GSM1274401;GSM1274402"t"GSM1274403;GSM1274404;GSM1274405"
"GSE52707"t"GSE52707:0000000:2"t"GSM1274406;GSM1274407;GSM1274408"t"GSM1274403;GSM1274404;GSM1274405"
"GSE52707"t"GSE52707:0000000:3"t"GSM1274409;GSM1274410;GSM1274411"t"GSM1274403;GSM1274404;GSM1274405"
"GSE52712"t"GSE52712:1:1"t"GSM1274492;GSM1274493;GSM1274494;GSM1274495;GSM1274496"t"GSM1274482;GSM1274483;GSM1274484;GSM1274485;GSM1274486"
"GSE52712"t"GSE52712:2:1"t"GSM1274497;GSM1274498;GSM1274499;GSM1274500;GSM1274501"t"GSM1274487;GSM1274488;GSM1274489;GSM1274490;GSM1274491"
"GSE52889"t"GSE52889:0:1"t"GSM1277540"t"GSM1277538"
"GSE52889"t"GSE52889:1:1"t"GSM1277539"t"GSM1277537"
"GSE52896"t"GSE52896:1:1"t"GSM1277643"t"GSM1277638"
"GSE52896"t"GSE52896:2:1"t"GSM1277644"t"GSM1277639"
"GSE52896"t"GSE52896:3:1"t"GSM1277645"t"GSM1277640"
"GSE52896"t"GSE52896:4:1"t"GSM1277646"t"GSM1277641"
"GSE52896"t"GSE52896:5:1"t"GSM1277647"t"GSM1277642"
"GSE52980"t"GSE52980:0:1"t"GSM1638793;GSM1638794;GSM1638795;GSM1638796;GSM1638797"t"GSM1638791;GSM1638792;GSM1638798"
"GSE52980"t"GSE52980:1:1"t"GSM1638786;GSM1638787;GSM1638788;GSM1638789"t"GSM1638783;GSM1638784;GSM1638785;GSM1638790"
"GSE52998"t"GSE52998:0000000:1"t"GSM1279939;GSM1279940;GSM1279941"t"GSM1279942;GSM1279943;GSM1279944"
"GSE53005"t"GSE53005:0000000:1"t"GSM1280286"t"GSM1280285"
"GSE53046"t"GSE53046:1:1"t"GSM1281026"t"GSM1281025"
"GSE53046"t"GSE53046:1:2"t"GSM1281027"t"GSM1281025"
"GSE53046"t"GSE53046:2:1"t"GSM1281029"t"GSM1281028"
"GSE53046"t"GSE53046:2:2"t"GSM1281030"t"GSM1281028"
"GSE53046"t"GSE53046:3:1"t"GSM1281032"t"GSM1281031"
"GSE53046"t"GSE53046:3:2"t"GSM1281033"t"GSM1281031"
"GSE53059"t"GSE53059:1:1"t"GSM1281435;GSM1281441"t"GSM1281432;GSM1281438"
"GSE53059"t"GSE53059:2:1"t"GSM1281436;GSM1281442"t"GSM1281433;GSM1281439"
"GSE53059"t"GSE53059:3:1"t"GSM1281437;GSM1281443"t"GSM1281434;GSM1281440"
"GSE53092"t"GSE53092:1:1"t"GSM1282318"t"GSM1282316"
"GSE53092"t"GSE53092:2:1"t"GSM1282319"t"GSM1282317"
"GSE53163"t"GSE53163:0000000:1"t"GSM1283278;GSM1283279"t"GSM1283274;GSM1283275;GSM1283276;GSM1283277"
"GSE53163"t"GSE53163:0000000:2"t"GSM1283280;GSM1283281;GSM1283282"t"GSM1283274;GSM1283275;GSM1283276;GSM1283277"
"GSE53223"t"GSE53223:0000000:1"t"GSM1287900;GSM1287901;GSM1287902;GSM1287903;GSM1287904"t"GSM1287912;GSM1287913;GSM1287914;GSM1287915;GSM1287916;GSM1287917"
"GSE53223"t"GSE53223:0000000:2"t"GSM1287905;GSM1287906;GSM1287907;GSM1287908;GSM1287909;GSM1287910;GSM1287911"t"GSM1287912;GSM1287913;GSM1287914;GSM1287915;GSM1287916;GSM1287917"
"GSE53224"t"GSE53224:0000000:01"t"GSM1287919"t"GSM1287918"
"GSE53224"t"GSE53224:0000000:02"t"GSM1287920"t"GSM1287918"
"GSE53224"t"GSE53224:0000000:03"t"GSM1287921"t"GSM1287918"
"GSE53224"t"GSE53224:0000000:04"t"GSM1287922"t"GSM1287918"
"GSE53224"t"GSE53224:0000000:05"t"GSM1287923"t"GSM1287918"
"GSE53224"t"GSE53224:0000000:06"t"GSM1287924"t"GSM1287918"
"GSE53224"t"GSE53224:0000000:07"t"GSM1287925"t"GSM1287918"
"GSE53224"t"GSE53224:0000000:08"t"GSM1287926"t"GSM1287918"
"GSE53224"t"GSE53224:0000000:09"t"GSM1287927"t"GSM1287918"
"GSE53224"t"GSE53224:0000000:10"t"GSM1287928"t"GSM1287918"
"GSE53224"t"GSE53224:0000000:11"t"GSM1287929"t"GSM1287918"
"GSE53224"t"GSE53224:0000000:12"t"GSM1287930"t"GSM1287918"
"GSE53224"t"GSE53224:0000000:13"t"GSM1287931"t"GSM1287918"
"GSE53224"t"GSE53224:0000000:14"t"GSM1287932"t"GSM1287918"
"GSE53224"t"GSE53224:0000000:15"t"GSM1287933"t"GSM1287918"
"GSE53224"t"GSE53224:0000000:16"t"GSM1287934"t"GSM1287918"
"GSE53224"t"GSE53224:0000000:17"t"GSM1287935"t"GSM1287918"
"GSE53224"t"GSE53224:0000000:18"t"GSM1287936"t"GSM1287918"
"GSE53224"t"GSE53224:0000000:19"t"GSM1287937"t"GSM1287918"
"GSE53224"t"GSE53224:0000000:20"t"GSM1287938"t"GSM1287918"
"GSE53224"t"GSE53224:0000000:21"t"GSM1287939"t"GSM1287918"
"GSE53224"t"GSE53224:0000000:22"t"GSM1287940"t"GSM1287918"
"GSE53224"t"GSE53224:0000000:23"t"GSM1287941"t"GSM1287918"
"GSE53224"t"GSE53224:0000000:24"t"GSM1287942"t"GSM1287918"
"GSE53224"t"GSE53224:0000000:25"t"GSM1287943"t"GSM1287918"
"GSE53224"t"GSE53224:0000000:26"t"GSM1287944"t"GSM1287918"
"GSE53224"t"GSE53224:0000000:27"t"GSM1287945"t"GSM1287918"
"GSE53224"t"GSE53224:0000000:28"t"GSM1287946"t"GSM1287918"
"GSE53224"t"GSE53224:0000000:29"t"GSM1287947"t"GSM1287918"
"GSE53224"t"GSE53224:0000000:30"t"GSM1287948"t"GSM1287918"
"GSE53224"t"GSE53224:0000000:31"t"GSM1287949"t"GSM1287918"
"GSE53224"t"GSE53224:0000000:32"t"GSM1287950"t"GSM1287918"
"GSE53224"t"GSE53224:0000000:33"t"GSM1287951"t"GSM1287918"
"GSE53224"t"GSE53224:0000000:34"t"GSM1287952"t"GSM1287918"
"GSE53224"t"GSE53224:0000000:35"t"GSM1287953"t"GSM1287918"
"GSE53224"t"GSE53224:0000000:36"t"GSM1287954"t"GSM1287918"
"GSE53224"t"GSE53224:0000000:37"t"GSM1287955"t"GSM1287918"
"GSE53224"t"GSE53224:0000000:38"t"GSM1287956"t"GSM1287918"
"GSE53224"t"GSE53224:0000000:39"t"GSM1287957"t"GSM1287918"
"GSE53224"t"GSE53224:0000000:40"t"GSM1287958"t"GSM1287918"
"GSE53224"t"GSE53224:0000000:41"t"GSM1287959"t"GSM1287918"
"GSE53224"t"GSE53224:0000000:42"t"GSM1287960"t"GSM1287918"
"GSE53224"t"GSE53224:0000000:43"t"GSM1287961"t"GSM1287918"
"GSE53224"t"GSE53224:0000000:44"t"GSM1287962"t"GSM1287918"
"GSE53224"t"GSE53224:0000000:45"t"GSM1287963"t"GSM1287918"
"GSE53224"t"GSE53224:0000000:46"t"GSM1287964"t"GSM1287918"
"GSE53224"t"GSE53224:0000000:47"t"GSM1287965"t"GSM1287918"
"GSE53224"t"GSE53224:0000000:48"t"GSM1287966"t"GSM1287918"
"GSE53224"t"GSE53224:0000000:49"t"GSM1287967"t"GSM1287918"
"GSE53224"t"GSE53224:0000000:50"t"GSM1287968"t"GSM1287918"
"GSE53224"t"GSE53224:0000000:51"t"GSM1287969"t"GSM1287918"
"GSE53224"t"GSE53224:0000000:52"t"GSM1287970"t"GSM1287918"
"GSE53245"t"GSE53245:0000000:1"t"GSM1288495"t"GSM1288494"
"GSE53245"t"GSE53245:0000000:2"t"GSM1288491"t"GSM1288494"
"GSE53245"t"GSE53245:0000000:3"t"GSM1288492;GSM1288493"t"GSM1288494"
"GSE53274"t"GSE53274:1:1"t"GSM1288823"t"GSM1288817"
"GSE53274"t"GSE53274:2:1"t"GSM1288824"t"GSM1288818"
"GSE53274"t"GSE53274:3:1"t"GSM1288821"t"GSM1288819"
"GSE53274"t"GSE53274:4:1"t"GSM1288822"t"GSM1288820"
"GSE53276"t"GSE53276:1:1"t"GSM1288834;GSM1288835"t"GSM1288836;GSM1288837"
"GSE53276"t"GSE53276:2:1"t"GSM1288838;GSM1288839"t"GSM1288840;GSM1288841"
"GSE53441"t"GSE53441:0000000:1"t"GSM1293592;GSM1293593;GSM1293594;GSM1293595;GSM1293596;GSM1293597;GSM1293598;GSM1293599;GSM1293600;GSM1293601;GSM1293602;GSM1293603;GSM1293604;GSM1293605;GSM1293606;GSM1293607;GSM1293608;GSM1293609;GSM1293610;GSM1293611;GSM1293612;GSM1293613;GSM1293614;GSM1293615"t"GSM1293616;GSM1293617;GSM1293618;GSM1293619;GSM1293620;GSM1293621;GSM1293622;GSM1293623;GSM1293624;GSM1293625"
"GSE53513"t"GSE53513:0000000:1"t"GSM1295147"t"GSM1295146"
"GSE53513"t"GSE53513:0000000:2"t"GSM1295148;GSM1295150;GSM1295152"t"GSM1295146"
"GSE53513"t"GSE53513:0000000:3"t"GSM1295149;GSM1295151;GSM1295153"t"GSM1295146"
"GSE53513"t"GSE53513:0000000:4"t"GSM1295154"t"GSM1295146"
"GSE53537"t"GSE53537:0000000:1"t"GSM599923"t"GSM599922"
"GSE53537"t"GSE53537:0000000:2"t"GSM599924"t"GSM599922"
"GSE53537"t"GSE53537:0000000:3"t"GSM599925"t"GSM599922"
"GSE53537"t"GSE53537:0000000:4"t"GSM599926"t"GSM599922"
"GSE53603"t"GSE53603:0:1"t"GSM1296648;GSM1296649"t"GSM1296646;GSM1296647"
"GSE53603"t"GSE53603:1:1"t"GSM1296652;GSM1296653"t"GSM1296650;GSM1296651"
"GSE53631"t"GSE53631:0000000:1"t"GSM1297517;GSM1297519"t"GSM1297516;GSM1297518"
"GSE53716"t"GSE53716:1:1"t"GSM1299336"t"GSM1299335"
"GSE53716"t"GSE53716:2:1"t"GSM1299338"t"GSM1299337"
"GSE53716"t"GSE53716:3:1"t"GSM1299340"t"GSM1299339"
"GSE53716"t"GSE53716:4:1"t"GSM1299342"t"GSM1299341"
"GSE53716"t"GSE53716:5:1"t"GSM1299344"t"GSM1299343"
"GSE53716"t"GSE53716:6:1"t"GSM1299346"t"GSM1299345"
"GSE53733"t"GSE53733:0000000:1"t"GSM1299532;GSM1299533;GSM1299534;GSM1299535;GSM1299536;GSM1299537;GSM1299538;GSM1299539;GSM1299540;GSM1299541;GSM1299542;GSM1299543;GSM1299544;GSM1299545;GSM1299546;GSM1299547;GSM1299548;GSM1299549;GSM1299550;GSM1299551;GSM1299552;GSM1299553;GSM1299554;GSM1299555;GSM1299556;GSM1299557;GSM1299558;GSM1299559;GSM1299560;GSM1299576;GSM1299577"t"GSM1299517;GSM1299518;GSM1299519;GSM1299520;GSM1299521;GSM1299522;GSM1299523;GSM1299524;GSM1299525;GSM1299526;GSM1299527;GSM1299528;GSM1299529;GSM1299530;GSM1299531;GSM1299575"
"GSE53733"t"GSE53733:0000000:2"t"GSM1299561;GSM1299562;GSM1299563;GSM1299564;GSM1299565;GSM1299566;GSM1299567;GSM1299568;GSM1299569;GSM1299570;GSM1299571;GSM1299572;GSM1299573;GSM1299574;GSM1299578;GSM1299579;GSM1299580;GSM1299581;GSM1299582;GSM1299583;GSM1299584;GSM1299585;GSM1299586"t"GSM1299517;GSM1299518;GSM1299519;GSM1299520;GSM1299521;GSM1299522;GSM1299523;GSM1299524;GSM1299525;GSM1299526;GSM1299527;GSM1299528;GSM1299529;GSM1299530;GSM1299531;GSM1299575"
"GSE53751"t"GSE53751:0000000:1"t"GSM1299980;GSM1299981"t"GSM1299978;GSM1299979"
"GSE53751"t"GSE53751:0000000:2"t"GSM1299982;GSM1299983"t"GSM1299978;GSM1299979"
"GSE53751"t"GSE53751:0000000:3"t"GSM1299984;GSM1299985"t"GSM1299978;GSM1299979"
"GSE53751"t"GSE53751:0000000:4"t"GSM1299986;GSM1299987"t"GSM1299978;GSM1299979"
"GSE53751"t"GSE53751:0000000:5"t"GSM1299988;GSM1299989"t"GSM1299978;GSM1299979"
"GSE53777"t"GSE53777:1:1"t"GSM1300609"t"GSM1300608"
"GSE53777"t"GSE53777:2:1"t"GSM1300611"t"GSM1300610"
"GSE53795"t"GSE53795:01:1"t"GSM1300911;GSM1300929"t"GSM1300912;GSM1300930"
"GSE53795"t"GSE53795:02:1"t"GSM1300913"t"GSM1300914"
"GSE53795"t"GSE53795:03:1"t"GSM1300915"t"GSM1300916"
"GSE53795"t"GSE53795:04:1"t"GSM1300917"t"GSM1300918"
"GSE53795"t"GSE53795:05:1"t"GSM1300919"t"GSM1300920"
"GSE53795"t"GSE53795:06:1"t"GSM1300921"t"GSM1300922"
"GSE53795"t"GSE53795:07:1"t"GSM1300923"t"GSM1300924"
"GSE53795"t"GSE53795:08:1"t"GSM1300925"t"GSM1300926"
"GSE53795"t"GSE53795:09:1"t"GSM1300927"t"GSM1300928"
"GSE53795"t"GSE53795:11:1"t"GSM1300931"t"GSM1300932"
"GSE53795"t"GSE53795:12:1"t"GSM1300933"t"GSM1300934"
"GSE53890"t"GSE53890:0000000:1"t"GSM1303156;GSM1303157;GSM1303158;GSM1303159;GSM1303160;GSM1303161;GSM1303162;GSM1303163;GSM1303164"t"GSM1303144;GSM1303145;GSM1303146;GSM1303147;GSM1303148;GSM1303149;GSM1303150;GSM1303151;GSM1303152;GSM1303153;GSM1303154;GSM1303155"
"GSE53890"t"GSE53890:0000000:2"t"GSM1303165;GSM1303166;GSM1303167;GSM1303168;GSM1303169;GSM1303170;GSM1303171;GSM1303172;GSM1303173;GSM1303174;GSM1303175;GSM1303176;GSM1303177;GSM1303178;GSM1303179;GSM1303180"t"GSM1303144;GSM1303145;GSM1303146;GSM1303147;GSM1303148;GSM1303149;GSM1303150;GSM1303151;GSM1303152;GSM1303153;GSM1303154;GSM1303155"
"GSE53890"t"GSE53890:0000000:3"t"GSM1303181;GSM1303182;GSM1303183;GSM1303184"t"GSM1303144;GSM1303145;GSM1303146;GSM1303147;GSM1303148;GSM1303149;GSM1303150;GSM1303151;GSM1303152;GSM1303153;GSM1303154;GSM1303155"
"GSE53985"t"GSE53985:0000000:1"t"GSM1305859;GSM1305860;GSM1305861"t"GSM1305856;GSM1305857;GSM1305858"
"GSE54002"t"GSE54002:0000000:1"t"GSM1305324;GSM1305325;GSM1305326;GSM1305327;GSM1305328;GSM1305329;GSM1305330;GSM1305331;GSM1305332;GSM1305333;GSM1305334;GSM1305335;GSM1305336;GSM1305337;GSM1305338;GSM1305339;GSM1305340;GSM1305341;GSM1305342;GSM1305343;GSM1305344;GSM1305345;GSM1305346;GSM1305347;GSM1305348;GSM1305349;GSM1305350;GSM1305351;GSM1305352;GSM1305353;GSM1305354;GSM1305355;GSM1305356;GSM1305357;GSM1305358;GSM1305359;GSM1305360;GSM1305361;GSM1305362;GSM1305363;GSM1305364;GSM1305365;GSM1305366;GSM1305367;GSM1305368;GSM1305369;GSM1305370;GSM1305371;GSM1305372;GSM1305373;GSM1305374;GSM1305375;GSM1305376;GSM1305377;GSM1305378;GSM1305379;GSM1305380;GSM1305381;GSM1305382;GSM1305383;GSM1305384;GSM1305385;GSM1305386;GSM1305387;GSM1305388;GSM1305389;GSM1305390;GSM1305391;GSM1305392;GSM1305393;GSM1305394;GSM1305395;GSM1305396;GSM1305397;GSM1305398;GSM1305399;GSM1305400;GSM1305401;GSM1305402;GSM1305403;GSM1305404;GSM1305405;GSM1305406;GSM1305407;GSM1305408;GSM1305409;GSM1305410;GSM1305411;GSM1305412;GSM1305413;GSM1305414;GSM1305415;GSM1305416;GSM1305417;GSM1305418;GSM1305419;GSM1305420;GSM1305421;GSM1305422;GSM1305423;GSM1305424;GSM1305425;GSM1305426;GSM1305427;GSM1305428;GSM1305429;GSM1305430;GSM1305431;GSM1305432;GSM1305433;GSM1305434;GSM1305435;GSM1305436;GSM1305437;GSM1305438;GSM1305439;GSM1305440;GSM1305441;GSM1305442;GSM1305443;GSM1305444;GSM1305445;GSM1305446;GSM1305447;GSM1305448;GSM1305449;GSM1305450;GSM1305451;GSM1305452;GSM1305453;GSM1305454;GSM1305455;GSM1305456;GSM1305457;GSM1305458;GSM1305459;GSM1305460;GSM1305461;GSM1305462;GSM1305463;GSM1305464;GSM1305465;GSM1305466;GSM1305467;GSM1305468;GSM1305469;GSM1305470;GSM1305471;GSM1305472;GSM1305473;GSM1305474;GSM1305475;GSM1305476;GSM1305477;GSM1305478;GSM1305479;GSM1305480;GSM1305481;GSM1305482;GSM1305483;GSM1305484;GSM1305485;GSM1305486;GSM1305487;GSM1305488;GSM1305489;GSM1305490;GSM1305491;GSM1305492;GSM1305493;GSM1305494;GSM1305495;GSM1305496;GSM1305497;GSM1305498;GSM1305499;GSM1305500;GSM1305501;GSM1305502;GSM1305503;GSM1305504;GSM1305505;GSM1305506;GSM1305507;GSM1305508;GSM1305509;GSM1305510;GSM1305511;GSM1305512;GSM1305513;GSM1305514;GSM1305515;GSM1305516;GSM1305517;GSM1305518;GSM1305519;GSM1305520;GSM1305521;GSM1305522;GSM1305523;GSM1305524;GSM1305525;GSM1305526;GSM1305527;GSM1305528;GSM1305529;GSM1305530;GSM1305531;GSM1305532;GSM1305533;GSM1305534;GSM1305535;GSM1305536;GSM1305537;GSM1305538;GSM1305539;GSM1305540;GSM1305541;GSM1305542;GSM1305543;GSM1305544;GSM1305545;GSM1305546;GSM1305547;GSM1305548;GSM1305549;GSM1305550;GSM1305551;GSM1305552;GSM1305553;GSM1305554;GSM1305555;GSM1305556;GSM1305557;GSM1305558;GSM1305559;GSM1305560;GSM1305561;GSM1305562;GSM1305563;GSM1305564;GSM1305565;GSM1305566;GSM1305567;GSM1305568;GSM1305569;GSM1305570;GSM1305571;GSM1305572;GSM1305573;GSM1305574;GSM1305575;GSM1305576;GSM1305577;GSM1305578;GSM1305579;GSM1305580;GSM1305581;GSM1305582;GSM1305583;GSM1305584;GSM1305585;GSM1305586;GSM1305587;GSM1305588;GSM1305589;GSM1305590;GSM1305591;GSM1305592;GSM1305593;GSM1305594;GSM1305595;GSM1305596;GSM1305597;GSM1305598;GSM1305599;GSM1305600;GSM1305601;GSM1305602;GSM1305603;GSM1305604;GSM1305605;GSM1305606;GSM1305607;GSM1305608;GSM1305609;GSM1305610;GSM1305611;GSM1305612;GSM1305613;GSM1305614;GSM1305615;GSM1305616;GSM1305617;GSM1305618;GSM1305619;GSM1305620;GSM1305621;GSM1305622;GSM1305623;GSM1305640;GSM1305641;GSM1305642;GSM1305643;GSM1305644;GSM1305645;GSM1305646;GSM1305647;GSM1305648;GSM1305649;GSM1305650;GSM1305651;GSM1305652;GSM1305653;GSM1305654;GSM1305655;GSM1305656;GSM1305657;GSM1305658;GSM1305659;GSM1305660;GSM1305661;GSM1305662;GSM1305663;GSM1305664;GSM1305665;GSM1305666;GSM1305667;GSM1305668;GSM1305669;GSM1305670;GSM1305671;GSM1305672;GSM1305673;GSM1305674;GSM1305675;GSM1305676;GSM1305677;GSM1305678;GSM1305679;GSM1305680;GSM1305681;GSM1305682;GSM1305683;GSM1305684;GSM1305685;GSM1305686;GSM1305687;GSM1305688;GSM1305689;GSM1305690;GSM1305691;GSM1305692;GSM1305693;GSM1305694;GSM1305695;GSM1305696;GSM1305697;GSM1305698;GSM1305699;GSM1305700;GSM1305701;GSM1305702;GSM1305703;GSM1305704;GSM1305705;GSM1305706;GSM1305707;GSM1305708;GSM1305709;GSM1305710;GSM1305711;GSM1305712;GSM1305713;GSM1305714;GSM1305715;GSM1305716;GSM1305717;GSM1305718;GSM1305719;GSM1305720;GSM1305721;GSM1305722;GSM1305723;GSM1305724;GSM1305725;GSM1305726;GSM1305727;GSM1305728;GSM1305729;GSM1305730;GSM1305731;GSM1305732;GSM1305733;GSM1305734;GSM1305735;GSM1305736;GSM1305737;GSM1305738;GSM1305739;GSM1305740;GSM1305741;GSM1305742;GSM1305743;GSM1305744;GSM1305745;GSM1305746;GSM1305747;GSM1305748;GSM1305749;GSM1305750;GSM1305751;GSM1305752;GSM1305753;GSM1305754;GSM1305755;GSM1305756"t"GSM1305624;GSM1305625;GSM1305626;GSM1305627;GSM1305628;GSM1305629;GSM1305630;GSM1305631;GSM1305632;GSM1305633;GSM1305634;GSM1305635;GSM1305636;GSM1305637;GSM1305638;GSM1305639"
"GSE54043"t"GSE54043:0000000:1"t"GSM1306296;GSM1306297;GSM1306298;GSM1306299;GSM1306300"t"GSM1306291;GSM1306292;GSM1306293;GSM1306294;GSM1306295"
"GSE54169"t"GSE54169:1:1"t"GSM1309056;GSM1309057;GSM1309058"t"GSM1309068;GSM1309069;GSM1309070"
"GSE54169"t"GSE54169:1:2"t"GSM1309062;GSM1309063;GSM1309064"t"GSM1309068;GSM1309069;GSM1309070"
"GSE54169"t"GSE54169:1:3"t"GSM1309065;GSM1309066;GSM1309067"t"GSM1309068;GSM1309069;GSM1309070"
"GSE54169"t"GSE54169:1:4"t"GSM1309059;GSM1309060;GSM1309061"t"GSM1309068;GSM1309069;GSM1309070"
"GSE54169"t"GSE54169:2:1"t"GSM1309071;GSM1309072;GSM1309073"t"GSM1309083;GSM1309084;GSM1309085"
"GSE54169"t"GSE54169:2:2"t"GSM1309077;GSM1309078;GSM1309079"t"GSM1309083;GSM1309084;GSM1309085"
"GSE54169"t"GSE54169:2:3"t"GSM1309080;GSM1309081;GSM1309082"t"GSM1309083;GSM1309084;GSM1309085"
"GSE54169"t"GSE54169:2:4"t"GSM1309074;GSM1309075;GSM1309076"t"GSM1309083;GSM1309084;GSM1309085"
"GSE54169"t"GSE54169:3:1"t"GSM1309086;GSM1309087;GSM1309088"t"GSM1309098;GSM1309099;GSM1309100"
"GSE54169"t"GSE54169:3:2"t"GSM1309092;GSM1309093;GSM1309094"t"GSM1309098;GSM1309099;GSM1309100"
"GSE54169"t"GSE54169:3:3"t"GSM1309095;GSM1309096;GSM1309097"t"GSM1309098;GSM1309099;GSM1309100"
"GSE54169"t"GSE54169:3:4"t"GSM1309089;GSM1309090;GSM1309091"t"GSM1309098;GSM1309099;GSM1309100"
"GSE54169"t"GSE54169:4:1"t"GSM1309101;GSM1309102;GSM1309103"t"GSM1309113;GSM1309114;GSM1309115"
"GSE54169"t"GSE54169:4:2"t"GSM1309107;GSM1309108;GSM1309109"t"GSM1309113;GSM1309114;GSM1309115"
"GSE54169"t"GSE54169:4:3"t"GSM1309110;GSM1309111;GSM1309112"t"GSM1309113;GSM1309114;GSM1309115"
"GSE54169"t"GSE54169:4:4"t"GSM1309104;GSM1309105;GSM1309106"t"GSM1309113;GSM1309114;GSM1309115"
"GSE54169"t"GSE54169:5:1"t"GSM1309116;GSM1309117;GSM1309118"t"GSM1309128;GSM1309129;GSM1309130"
"GSE54169"t"GSE54169:5:2"t"GSM1309122;GSM1309123;GSM1309124"t"GSM1309128;GSM1309129;GSM1309130"
"GSE54169"t"GSE54169:5:3"t"GSM1309125;GSM1309126;GSM1309127"t"GSM1309128;GSM1309129;GSM1309130"
"GSE54169"t"GSE54169:5:4"t"GSM1309119;GSM1309120;GSM1309121"t"GSM1309128;GSM1309129;GSM1309130"
"GSE54247"t"GSE54247:0000000:01"t"GSM1310909;GSM1310910"t"GSM1310907;GSM1310908"
"GSE54247"t"GSE54247:0000000:02"t"GSM1310911;GSM1310912"t"GSM1310907;GSM1310908"
"GSE54247"t"GSE54247:0000000:03"t"GSM1310913;GSM1310914"t"GSM1310907;GSM1310908"
"GSE54247"t"GSE54247:0000000:04"t"GSM1310915;GSM1310916"t"GSM1310907;GSM1310908"
"GSE54247"t"GSE54247:0000000:05"t"GSM1310917;GSM1310918"t"GSM1310907;GSM1310908"
"GSE54247"t"GSE54247:0000000:06"t"GSM1310919;GSM1310920"t"GSM1310907;GSM1310908"
"GSE54247"t"GSE54247:0000000:07"t"GSM1310921;GSM1310922"t"GSM1310907;GSM1310908"
"GSE54247"t"GSE54247:0000000:08"t"GSM1310923;GSM1310924"t"GSM1310907;GSM1310908"
"GSE54247"t"GSE54247:0000000:09"t"GSM1310925;GSM1310926"t"GSM1310907;GSM1310908"
"GSE54247"t"GSE54247:0000000:10"t"GSM1310927;GSM1310928"t"GSM1310907;GSM1310908"
"GSE54247"t"GSE54247:0000000:11"t"GSM1310929;GSM1310930"t"GSM1310907;GSM1310908"
"GSE54247"t"GSE54247:0000000:12"t"GSM1310931;GSM1310932"t"GSM1310907;GSM1310908"
"GSE54314"t"GSE54314:0000000:1"t"GSM1312833;GSM1312834;GSM1312835;GSM1312836"t"GSM1312830;GSM1312831;GSM1312832"
"GSE54315"t"GSE54315:0000000:1"t"GSM1312840;GSM1312841;GSM1312842"t"GSM1312837;GSM1312838;GSM1312839"
"GSE54323"t"GSE54323:01:1"t"GSM1312929;GSM1312947"t"GSM1312928;GSM1312946"
"GSE54323"t"GSE54323:02:1"t"GSM1312931"t"GSM1312930"
"GSE54323"t"GSE54323:03:1"t"GSM1312933"t"GSM1312932"
"GSE54323"t"GSE54323:04:1"t"GSM1312935"t"GSM1312934"
"GSE54323"t"GSE54323:05:1"t"GSM1312937"t"GSM1312936"
"GSE54323"t"GSE54323:06:1"t"GSM1312939"t"GSM1312938"
"GSE54323"t"GSE54323:07:1"t"GSM1312941"t"GSM1312940"
"GSE54323"t"GSE54323:08:1"t"GSM1312943"t"GSM1312942"
"GSE54323"t"GSE54323:09:1"t"GSM1312945"t"GSM1312944"
"GSE54323"t"GSE54323:11:1"t"GSM1312949"t"GSM1312948"
"GSE54323"t"GSE54323:12:1"t"GSM1312951"t"GSM1312950"
"GSE54323"t"GSE54323:14:1"t"GSM1312954"t"GSM1312953"
"GSE54323"t"GSE54323:15:1"t"GSM1312956"t"GSM1312955"
"GSE54378"t"GSE54378:1:1"t"GSM1314115;GSM1314116"t"GSM1314113;GSM1314114"
"GSE54378"t"GSE54378:2:1"t"GSM1314119;GSM1314120"t"GSM1314117;GSM1314118"
"GSE54402"t"GSE54402:0000000:1"t"GSM1314488;GSM1314489;GSM1314490;GSM1314491;GSM1314492;GSM1314493"t"GSM1314484;GSM1314485;GSM1314486;GSM1314487"
"GSE54483"t"GSE54483:0000000:01"t"GSM1316660"t"GSM1316659"
"GSE54483"t"GSE54483:0000000:02"t"GSM1316661"t"GSM1316659"
"GSE54483"t"GSE54483:0000000:03"t"GSM1316662"t"GSM1316659"
"GSE54483"t"GSE54483:0000000:04"t"GSM1316663"t"GSM1316659"
"GSE54483"t"GSE54483:0000000:05"t"GSM1316664"t"GSM1316659"
"GSE54483"t"GSE54483:0000000:06"t"GSM1316665"t"GSM1316659"
"GSE54483"t"GSE54483:0000000:07"t"GSM1316666"t"GSM1316659"
"GSE54483"t"GSE54483:0000000:08"t"GSM1316667"t"GSM1316659"
"GSE54483"t"GSE54483:0000000:09"t"GSM1316668"t"GSM1316659"
"GSE54483"t"GSE54483:0000000:10"t"GSM1316669"t"GSM1316659"
"GSE54495"t"GSE54495:0000000:1"t"GSM1316829;GSM1316830;GSM1316831;GSM1316832;GSM1316833;GSM1316834;GSM1316835;GSM1316836;GSM1316838;GSM1316839;GSM1316840;GSM1316841;GSM1316842;GSM1316848;GSM1316849;GSM1316850;GSM1316851"t"GSM1316828;GSM1316837;GSM1316843;GSM1316844;GSM1316845;GSM1316846;GSM1316847;GSM1316852;GSM1316853;GSM1316854;GSM1316855;GSM1316856;GSM1316857"
"GSE54565"t"GSE54565:01:1"t"GSM1319006;GSM1319015"t"GSM1318990;GSM1318999"
"GSE54565"t"GSE54565:02:1"t"GSM1319007"t"GSM1318991"
"GSE54565"t"GSE54565:03:1"t"GSM1319008"t"GSM1318992"
"GSE54565"t"GSE54565:04:1"t"GSM1319009"t"GSM1318993"
"GSE54565"t"GSE54565:05:1"t"GSM1319010"t"GSM1318994"
"GSE54565"t"GSE54565:06:1"t"GSM1319011"t"GSM1318995"
"GSE54565"t"GSE54565:07:1"t"GSM1319012"t"GSM1318996"
"GSE54565"t"GSE54565:08:1"t"GSM1319013"t"GSM1318997"
"GSE54565"t"GSE54565:09:1"t"GSM1319014"t"GSM1318998"
"GSE54565"t"GSE54565:11:1"t"GSM1319016"t"GSM1319000"
"GSE54565"t"GSE54565:12:1"t"GSM1319017"t"GSM1319001"
"GSE54565"t"GSE54565:13:1"t"GSM1319018"t"GSM1319002"
"GSE54565"t"GSE54565:14:1"t"GSM1319019"t"GSM1319003"
"GSE54565"t"GSE54565:15:1"t"GSM1319020"t"GSM1319004"
"GSE54565"t"GSE54565:16:1"t"GSM1319021"t"GSM1319005"
"GSE54566"t"GSE54566:01:1"t"GSM1319036;GSM1319045"t"GSM1319022;GSM1319031"
"GSE54566"t"GSE54566:02:1"t"GSM1319037"t"GSM1319023"
"GSE54566"t"GSE54566:03:1"t"GSM1319038"t"GSM1319024"
"GSE54566"t"GSE54566:04:1"t"GSM1319039"t"GSM1319025"
"GSE54566"t"GSE54566:05:1"t"GSM1319040"t"GSM1319026"
"GSE54566"t"GSE54566:06:1"t"GSM1319041"t"GSM1319027"
"GSE54566"t"GSE54566:07:1"t"GSM1319042"t"GSM1319028"
"GSE54566"t"GSE54566:08:1"t"GSM1319043"t"GSM1319029"
"GSE54566"t"GSE54566:09:1"t"GSM1319044"t"GSM1319030"
"GSE54566"t"GSE54566:11:1"t"GSM1319046"t"GSM1319032"
"GSE54566"t"GSE54566:12:1"t"GSM1319047"t"GSM1319033"
"GSE54566"t"GSE54566:13:1"t"GSM1319048"t"GSM1319034"
"GSE54566"t"GSE54566:14:1"t"GSM1319049"t"GSM1319035"
"GSE54567"t"GSE54567:01:1"t"GSM1319064;GSM1319073"t"GSM1319050;GSM1319059"
"GSE54567"t"GSE54567:02:1"t"GSM1319065"t"GSM1319051"
"GSE54567"t"GSE54567:03:1"t"GSM1319066"t"GSM1319052"
"GSE54567"t"GSE54567:04:1"t"GSM1319067"t"GSM1319053"
"GSE54567"t"GSE54567:05:1"t"GSM1319068"t"GSM1319054"
"GSE54567"t"GSE54567:06:1"t"GSM1319069"t"GSM1319055"
"GSE54567"t"GSE54567:07:1"t"GSM1319070"t"GSM1319056"
"GSE54567"t"GSE54567:08:1"t"GSM1319071"t"GSM1319057"
"GSE54567"t"GSE54567:09:1"t"GSM1319072"t"GSM1319058"
"GSE54567"t"GSE54567:11:1"t"GSM1319074"t"GSM1319060"
"GSE54567"t"GSE54567:12:1"t"GSM1319075"t"GSM1319061"
"GSE54567"t"GSE54567:13:1"t"GSM1319076"t"GSM1319062"
"GSE54567"t"GSE54567:14:1"t"GSM1319077"t"GSM1319063"
"GSE54568"t"GSE54568:01:1"t"GSM1319093;GSM1319102"t"GSM1319078;GSM1319087"
"GSE54568"t"GSE54568:02:1"t"GSM1319094"t"GSM1319079"
"GSE54568"t"GSE54568:03:1"t"GSM1319095"t"GSM1319080"
"GSE54568"t"GSE54568:04:1"t"GSM1319096"t"GSM1319081"
"GSE54568"t"GSE54568:05:1"t"GSM1319097"t"GSM1319082"
"GSE54568"t"GSE54568:06:1"t"GSM1319098"t"GSM1319083"
"GSE54568"t"GSE54568:07:1"t"GSM1319099"t"GSM1319084"
"GSE54568"t"GSE54568:08:1"t"GSM1319100"t"GSM1319085"
"GSE54568"t"GSE54568:09:1"t"GSM1319101"t"GSM1319086"
"GSE54568"t"GSE54568:11:1"t"GSM1319103"t"GSM1319088"
"GSE54568"t"GSE54568:12:1"t"GSM1319104"t"GSM1319089"
"GSE54568"t"GSE54568:13:1"t"GSM1319105"t"GSM1319090"
"GSE54568"t"GSE54568:14:1"t"GSM1319106"t"GSM1319091"
"GSE54568"t"GSE54568:15:1"t"GSM1319107"t"GSM1319092"
"GSE54571"t"GSE54571:01:1"t"GSM1319155;GSM1319164"t"GSM1319142;GSM1319151"
"GSE54571"t"GSE54571:02:1"t"GSM1319156"t"GSM1319143"
"GSE54571"t"GSE54571:03:1"t"GSM1319157"t"GSM1319144"
"GSE54571"t"GSE54571:04:1"t"GSM1319158"t"GSM1319145"
"GSE54571"t"GSE54571:05:1"t"GSM1319159"t"GSM1319146"
"GSE54571"t"GSE54571:06:1"t"GSM1319160"t"GSM1319147"
"GSE54571"t"GSE54571:07:1"t"GSM1319161"t"GSM1319148"
"GSE54571"t"GSE54571:08:1"t"GSM1319162"t"GSM1319149"
"GSE54571"t"GSE54571:09:1"t"GSM1319163"t"GSM1319150"
"GSE54571"t"GSE54571:11:1"t"GSM1319165"t"GSM1319152"
"GSE54571"t"GSE54571:12:1"t"GSM1319166"t"GSM1319153"
"GSE54571"t"GSE54571:13:1"t"GSM1319167"t"GSM1319154"
"GSE54572"t"GSE54572:01:1"t"GSM1319180;GSM1319189"t"GSM1319168;GSM1319177"
"GSE54572"t"GSE54572:02:1"t"GSM1319181"t"GSM1319169"
"GSE54572"t"GSE54572:03:1"t"GSM1319182"t"GSM1319170"
"GSE54572"t"GSE54572:04:1"t"GSM1319183"t"GSM1319171"
"GSE54572"t"GSE54572:05:1"t"GSM1319184"t"GSM1319172"
"GSE54572"t"GSE54572:06:1"t"GSM1319185"t"GSM1319173"
"GSE54572"t"GSE54572:07:1"t"GSM1319186"t"GSM1319174"
"GSE54572"t"GSE54572:08:1"t"GSM1319187"t"GSM1319175"
"GSE54572"t"GSE54572:09:1"t"GSM1319188"t"GSM1319176"
"GSE54572"t"GSE54572:11:1"t"GSM1319190"t"GSM1319178"
"GSE54572"t"GSE54572:12:1"t"GSM1319191"t"GSM1319179"
"GSE54837"t"GSE54837:0000000:1"t"GSM1324622;GSM1324629;GSM1324630;GSM1324634;GSM1324635;GSM1324636;GSM1324637;GSM1324639;GSM1324643;GSM1324645;GSM1324646;GSM1324649;GSM1324652;GSM1324656;GSM1324657;GSM1324659;GSM1324661;GSM1324669;GSM1324678;GSM1324680;GSM1324687;GSM1324690;GSM1324691;GSM1324699;GSM1324700;GSM1324703;GSM1324711;GSM1324719;GSM1324728;GSM1324735;GSM1324737;GSM1324738;GSM1324745;GSM1324749;GSM1324751;GSM1324752;GSM1324758;GSM1324760;GSM1324764;GSM1324767;GSM1324770;GSM1324771;GSM1324772;GSM1324776;GSM1324777;GSM1324784;GSM1324786;GSM1324789;GSM1324790;GSM1324792;GSM1324795;GSM1324804;GSM1324807;GSM1324808;GSM1324809;GSM1324814;GSM1324816;GSM1324817;GSM1324818;GSM1324821;GSM1324822;GSM1324823;GSM1324825;GSM1324828;GSM1324839;GSM1324844;GSM1324845;GSM1324846"t"GSM1324623;GSM1324626;GSM1324628;GSM1324633;GSM1324638;GSM1324641;GSM1324644;GSM1324651;GSM1324653;GSM1324654;GSM1324660;GSM1324662;GSM1324664;GSM1324667;GSM1324670;GSM1324673;GSM1324674;GSM1324675;GSM1324676;GSM1324679;GSM1324681;GSM1324682;GSM1324685;GSM1324686;GSM1324688;GSM1324689;GSM1324692;GSM1324694;GSM1324695;GSM1324696;GSM1324697;GSM1324698;GSM1324704;GSM1324705;GSM1324706;GSM1324708;GSM1324710;GSM1324713;GSM1324715;GSM1324716;GSM1324717;GSM1324718;GSM1324723;GSM1324724;GSM1324725;GSM1324726;GSM1324730;GSM1324734;GSM1324740;GSM1324742;GSM1324743;GSM1324747;GSM1324748;GSM1324750;GSM1324755;GSM1324757;GSM1324759;GSM1324762;GSM1324765;GSM1324766;GSM1324768;GSM1324769;GSM1324773;GSM1324774;GSM1324779;GSM1324781;GSM1324783;GSM1324787;GSM1324788;GSM1324793;GSM1324794;GSM1324796;GSM1324797;GSM1324798;GSM1324801;GSM1324802;GSM1324803;GSM1324810;GSM1324812;GSM1324819;GSM1324820;GSM1324824;GSM1324827;GSM1324830;GSM1324831;GSM1324833;GSM1324834;GSM1324837;GSM1324840;GSM1324842"
"GSE54837"t"GSE54837:0000000:2"t"GSM1324621;GSM1324624;GSM1324625;GSM1324627;GSM1324631;GSM1324632;GSM1324640;GSM1324647;GSM1324648;GSM1324650;GSM1324655;GSM1324658;GSM1324666;GSM1324672;GSM1324677;GSM1324683;GSM1324684;GSM1324693;GSM1324702;GSM1324709;GSM1324712;GSM1324714;GSM1324720;GSM1324721;GSM1324727;GSM1324729;GSM1324732;GSM1324733;GSM1324736;GSM1324739;GSM1324741;GSM1324744;GSM1324746;GSM1324753;GSM1324754;GSM1324756;GSM1324761;GSM1324763;GSM1324775;GSM1324778;GSM1324780;GSM1324782;GSM1324799;GSM1324800;GSM1324805;GSM1324811;GSM1324813;GSM1324815;GSM1324826;GSM1324829;GSM1324832;GSM1324835;GSM1324836;GSM1324838;GSM1324843"t"GSM1324623;GSM1324626;GSM1324628;GSM1324633;GSM1324638;GSM1324641;GSM1324644;GSM1324651;GSM1324653;GSM1324654;GSM1324660;GSM1324662;GSM1324664;GSM1324667;GSM1324670;GSM1324673;GSM1324674;GSM1324675;GSM1324676;GSM1324679;GSM1324681;GSM1324682;GSM1324685;GSM1324686;GSM1324688;GSM1324689;GSM1324692;GSM1324694;GSM1324695;GSM1324696;GSM1324697;GSM1324698;GSM1324704;GSM1324705;GSM1324706;GSM1324708;GSM1324710;GSM1324713;GSM1324715;GSM1324716;GSM1324717;GSM1324718;GSM1324723;GSM1324724;GSM1324725;GSM1324726;GSM1324730;GSM1324734;GSM1324740;GSM1324742;GSM1324743;GSM1324747;GSM1324748;GSM1324750;GSM1324755;GSM1324757;GSM1324759;GSM1324762;GSM1324765;GSM1324766;GSM1324768;GSM1324769;GSM1324773;GSM1324774;GSM1324779;GSM1324781;GSM1324783;GSM1324787;GSM1324788;GSM1324793;GSM1324794;GSM1324796;GSM1324797;GSM1324798;GSM1324801;GSM1324802;GSM1324803;GSM1324810;GSM1324812;GSM1324819;GSM1324820;GSM1324824;GSM1324827;GSM1324830;GSM1324831;GSM1324833;GSM1324834;GSM1324837;GSM1324840;GSM1324842"
"GSE54837"t"GSE54837:0000000:3"t"GSM1324642;GSM1324663;GSM1324665;GSM1324668;GSM1324671;GSM1324701;GSM1324707;GSM1324722;GSM1324731;GSM1324785;GSM1324791;GSM1324806;GSM1324841"t"GSM1324623;GSM1324626;GSM1324628;GSM1324633;GSM1324638;GSM1324641;GSM1324644;GSM1324651;GSM1324653;GSM1324654;GSM1324660;GSM1324662;GSM1324664;GSM1324667;GSM1324670;GSM1324673;GSM1324674;GSM1324675;GSM1324676;GSM1324679;GSM1324681;GSM1324682;GSM1324685;GSM1324686;GSM1324688;GSM1324689;GSM1324692;GSM1324694;GSM1324695;GSM1324696;GSM1324697;GSM1324698;GSM1324704;GSM1324705;GSM1324706;GSM1324708;GSM1324710;GSM1324713;GSM1324715;GSM1324716;GSM1324717;GSM1324718;GSM1324723;GSM1324724;GSM1324725;GSM1324726;GSM1324730;GSM1324734;GSM1324740;GSM1324742;GSM1324743;GSM1324747;GSM1324748;GSM1324750;GSM1324755;GSM1324757;GSM1324759;GSM1324762;GSM1324765;GSM1324766;GSM1324768;GSM1324769;GSM1324773;GSM1324774;GSM1324779;GSM1324781;GSM1324783;GSM1324787;GSM1324788;GSM1324793;GSM1324794;GSM1324796;GSM1324797;GSM1324798;GSM1324801;GSM1324802;GSM1324803;GSM1324810;GSM1324812;GSM1324819;GSM1324820;GSM1324824;GSM1324827;GSM1324830;GSM1324831;GSM1324833;GSM1324834;GSM1324837;GSM1324840;GSM1324842"
"GSE54992"t"GSE54992:01:1"t"GSM1327547"t"GSM1327544"
"GSE54992"t"GSE54992:02:2"t"GSM1327535"t"GSM1327549"
"GSE54992"t"GSE54992:02:3"t"GSM1327557"t"GSM1327549"
"GSE54992"t"GSE54992:02:4"t"GSM1327563"t"GSM1327549"
"GSE54992"t"GSE54992:13:3"t"GSM1327532"t"GSM1327526"
"GSE54992"t"GSE54992:13:4"t"GSM1327552"t"GSM1327526"
"GSE54992"t"GSE54992:14:3"t"GSM1327555"t"GSM1327533"
"GSE54992"t"GSE54992:14:4"t"GSM1327562"t"GSM1327533"
"GSE54992"t"GSE54992:15:3"t"GSM1327554"t"GSM1327531"
"GSE54992"t"GSE54992:15:4"t"GSM1327561"t"GSM1327531"
"GSE54992"t"GSE54992:16:3"t"GSM1327559"t"GSM1327540"
"GSE54992"t"GSE54992:16:4"t"GSM1327564"t"GSM1327540"
"GSE54992"t"GSE54992:17:3"t"GSM1327537"t"GSM1327529"
"GSE54992"t"GSE54992:17:4"t"GSM1327558"t"GSM1327529"
"GSE54992"t"GSE54992:18:3"t"GSM1327534"t"GSM1327527"
"GSE54992"t"GSE54992:18:4"t"GSM1327556"t"GSM1327527"
"GSE54992"t"GSE54992:19:3"t"GSM1327538"t"GSM1327530"
"GSE54992"t"GSE54992:19:4"t"GSM1327560"t"GSM1327530"
"GSE54992"t"GSE54992:21:3"t"GSM1327536"t"GSM1327528"
"GSE54992"t"GSE54992:21:4"t"GSM1327553"t"GSM1327528"
"GSE55034"t"GSE55034:0000000:1"t"GSM1328178"t"GSM1328177"
"GSE55034"t"GSE55034:0000000:2"t"GSM1328179"t"GSM1328177"
"GSE55034"t"GSE55034:0000000:3"t"GSM1328180"t"GSM1328177"
"GSE55092"t"GSE55092:01:1"t"GSM1329441;GSM1329450"t"GSM1329451;GSM1329460"
"GSE55092"t"GSE55092:01:2"t"GSM1329368;GSM1329369;GSM1329381;GSM1329382;GSM1329383;GSM1329384;GSM1329389;GSM1329400;GSM1329401;GSM1329402;GSM1329403;GSM1329418;GSM1329435;GSM1329436;GSM1329437;GSM1329438;GSM1329439;GSM1329440"t"GSM1329451;GSM1329460"
"GSE55092"t"GSE55092:01:3"t"GSM1329328;GSM1329333;GSM1329346;GSM1329347;GSM1329358;GSM1329359"t"GSM1329451;GSM1329460"
"GSE55092"t"GSE55092:02:1"t"GSM1329442"t"GSM1329452"
"GSE55092"t"GSE55092:02:2"t"GSM1329370;GSM1329371;GSM1329372;GSM1329373;GSM1329390;GSM1329391;GSM1329392;GSM1329419;GSM1329420;GSM1329421;GSM1329422;GSM1329423"t"GSM1329452"
"GSE55092"t"GSE55092:02:3"t"GSM1329329;GSM1329348;GSM1329349;GSM1329350"t"GSM1329452"
"GSE55092"t"GSE55092:03:1"t"GSM1329443"t"GSM1329453"
"GSE55092"t"GSE55092:03:2"t"GSM1329374;GSM1329375;GSM1329376;GSM1329424"t"GSM1329453"
"GSE55092"t"GSE55092:03:3"t"GSM1329330;GSM1329351;GSM1329352;GSM1329353;GSM1329354"t"GSM1329453"
"GSE55092"t"GSE55092:04:1"t"GSM1329444"t"GSM1329454"
"GSE55092"t"GSE55092:04:2"t"GSM1329377;GSM1329378;GSM1329393;GSM1329394;GSM1329395;GSM1329425;GSM1329426;GSM1329427;GSM1329428"t"GSM1329454"
"GSE55092"t"GSE55092:04:3"t"GSM1329331;GSM1329355"t"GSM1329454"
"GSE55092"t"GSE55092:05:1"t"GSM1329445"t"GSM1329455"
"GSE55092"t"GSE55092:05:2"t"GSM1329404;GSM1329405"t"GSM1329455"
"GSE55092"t"GSE55092:06:1"t"GSM1329446"t"GSM1329456"
"GSE55092"t"GSE55092:06:2"t"GSM1329360;GSM1329361;GSM1329362;GSM1329363;GSM1329385;GSM1329386;GSM1329387;GSM1329388;GSM1329406;GSM1329407;GSM1329408;GSM1329409;GSM1329410;GSM1329411;GSM1329412;GSM1329413;GSM1329414"t"GSM1329456"
"GSE55092"t"GSE55092:06:3"t"GSM1329324;GSM1329325;GSM1329334;GSM1329335;GSM1329336;GSM1329337;GSM1329338;GSM1329339;GSM1329340;GSM1329341"t"GSM1329456"
"GSE55092"t"GSE55092:07:1"t"GSM1329447"t"GSM1329457"
"GSE55092"t"GSE55092:07:3"t"GSM1329326"t"GSM1329457"
"GSE55092"t"GSE55092:08:1"t"GSM1329448"t"GSM1329458"
"GSE55092"t"GSE55092:08:2"t"GSM1329364;GSM1329365;GSM1329366;GSM1329367;GSM1329415;GSM1329416;GSM1329417"t"GSM1329458"
"GSE55092"t"GSE55092:08:3"t"GSM1329327;GSM1329342;GSM1329343;GSM1329344;GSM1329345"t"GSM1329458"
"GSE55092"t"GSE55092:09:1"t"GSM1329449"t"GSM1329459"
"GSE55092"t"GSE55092:09:2"t"GSM1329379;GSM1329380;GSM1329396;GSM1329397;GSM1329398;GSM1329399;GSM1329429;GSM1329430;GSM1329431;GSM1329432;GSM1329433;GSM1329434"t"GSM1329459"
"GSE55092"t"GSE55092:09:3"t"GSM1329332;GSM1329356;GSM1329357"t"GSM1329459"
"GSE55098"t"GSE55098:0000000:1"t"GSM1329626;GSM1329627;GSM1329628;GSM1329629;GSM1329630;GSM1329631;GSM1329632;GSM1329633;GSM1329634;GSM1329635;GSM1329636;GSM1329637"t"GSM1329616;GSM1329617;GSM1329618;GSM1329619;GSM1329620;GSM1329621;GSM1329622;GSM1329623;GSM1329624;GSM1329625"
"GSE55201"t"GSE55201:1:1"t"GSM1331528"t"GSM1331520"
"GSE55201"t"GSE55201:2:1"t"GSM1331529"t"GSM1331521"
"GSE55201"t"GSE55201:3:1"t"GSM1331530"t"GSM1331522"
"GSE55201"t"GSE55201:4:1"t"GSM1331531"t"GSM1331524"
"GSE55201"t"GSE55201:5:1"t"GSM1331532"t"GSM1331525"
"GSE55201"t"GSE55201:6:1"t"GSM1331533"t"GSM1331526"
"GSE55201"t"GSE55201:7:1"t"GSM1331534"t"GSM1331527"
"GSE55267"t"GSE55267:0000000:01"t"GSM1332985"t"GSM1332984"
"GSE55267"t"GSE55267:0000000:02"t"GSM1332986"t"GSM1332984"
"GSE55267"t"GSE55267:0000000:03"t"GSM1332987"t"GSM1332984"
"GSE55267"t"GSE55267:0000000:04"t"GSM1332988"t"GSM1332984"
"GSE55267"t"GSE55267:0000000:05"t"GSM1332989"t"GSM1332984"
"GSE55267"t"GSE55267:0000000:06"t"GSM1332990"t"GSM1332984"
"GSE55267"t"GSE55267:0000000:07"t"GSM1332991"t"GSM1332984"
"GSE55267"t"GSE55267:0000000:08"t"GSM1332992"t"GSM1332984"
"GSE55267"t"GSE55267:0000000:09"t"GSM1332993"t"GSM1332984"
"GSE55267"t"GSE55267:0000000:10"t"GSM1332994"t"GSM1332984"
"GSE55267"t"GSE55267:0000000:11"t"GSM1332995"t"GSM1332984"
"GSE55267"t"GSE55267:0000000:12"t"GSM1332996"t"GSM1332984"
"GSE55267"t"GSE55267:0000000:13"t"GSM1332997"t"GSM1332984"
"GSE55267"t"GSE55267:0000000:14"t"GSM1332998"t"GSM1332984"
"GSE55267"t"GSE55267:0000000:15"t"GSM1332999"t"GSM1332984"
"GSE55267"t"GSE55267:0000000:16"t"GSM1333000"t"GSM1332984"
"GSE55267"t"GSE55267:0000000:17"t"GSM1333001"t"GSM1332984"
"GSE55267"t"GSE55267:0000000:18"t"GSM1333002"t"GSM1332984"
"GSE55267"t"GSE55267:0000000:19"t"GSM1333003"t"GSM1332984"
"GSE55267"t"GSE55267:0000000:20"t"GSM1333004"t"GSM1332984"
"GSE55267"t"GSE55267:0000000:21"t"GSM1333005"t"GSM1332984"
"GSE55267"t"GSE55267:0000000:22"t"GSM1333006"t"GSM1332984"
"GSE55267"t"GSE55267:0000000:23"t"GSM1333007"t"GSM1332984"
"GSE55267"t"GSE55267:0000000:24"t"GSM1333008"t"GSM1332984"
"GSE55267"t"GSE55267:0000000:25"t"GSM1333009"t"GSM1332984"
"GSE55267"t"GSE55267:0000000:26"t"GSM1333010"t"GSM1332984"
"GSE55267"t"GSE55267:0000000:27"t"GSM1333011"t"GSM1332984"
"GSE55267"t"GSE55267:0000000:28"t"GSM1333012"t"GSM1332984"
"GSE55267"t"GSE55267:0000000:29"t"GSM1333013"t"GSM1332984"
"GSE55267"t"GSE55267:0000000:30"t"GSM1333014"t"GSM1332984"
"GSE55267"t"GSE55267:0000000:31"t"GSM1333021"t"GSM1332984"
"GSE55267"t"GSE55267:0000000:32"t"GSM1333022"t"GSM1332984"
"GSE55267"t"GSE55267:0000000:33"t"GSM1333023"t"GSM1332984"
"GSE55267"t"GSE55267:0000000:34"t"GSM1333024"t"GSM1332984"
"GSE55267"t"GSE55267:0000000:35"t"GSM1333025"t"GSM1332984"
"GSE55267"t"GSE55267:0000000:36"t"GSM1333026"t"GSM1332984"
"GSE55267"t"GSE55267:0000000:37"t"GSM1333027"t"GSM1332984"
"GSE55267"t"GSE55267:0000000:38"t"GSM1333028"t"GSM1332984"
"GSE55267"t"GSE55267:0000000:39"t"GSM1333029"t"GSM1332984"
"GSE55267"t"GSE55267:0000000:40"t"GSM1333030"t"GSM1332984"
"GSE55267"t"GSE55267:0000000:41"t"GSM1333031"t"GSM1332984"
"GSE55267"t"GSE55267:0000000:42"t"GSM1333032"t"GSM1332984"
"GSE55267"t"GSE55267:0000000:43"t"GSM1333033"t"GSM1332984"
"GSE55267"t"GSE55267:0000000:44"t"GSM1333034"t"GSM1332984"
"GSE55267"t"GSE55267:0000000:45"t"GSM1333035"t"GSM1332984"
"GSE55267"t"GSE55267:0000000:46"t"GSM1333036"t"GSM1332984"
"GSE55267"t"GSE55267:0000000:47"t"GSM1333037"t"GSM1332984"
"GSE55267"t"GSE55267:0000000:48"t"GSM1333038"t"GSM1332984"
"GSE55267"t"GSE55267:0000000:49"t"GSM1333039"t"GSM1332984"
"GSE55267"t"GSE55267:0000000:50"t"GSM1333040"t"GSM1332984"
"GSE55267"t"GSE55267:0000000:51"t"GSM1333041"t"GSM1332984"
"GSE55267"t"GSE55267:0000000:52"t"GSM1333042"t"GSM1332984"
"GSE55267"t"GSE55267:0000000:53"t"GSM1333043"t"GSM1332984"
"GSE55267"t"GSE55267:0000000:54"t"GSM1333044"t"GSM1332984"
"GSE55267"t"GSE55267:0000000:55"t"GSM1333045"t"GSM1332984"
"GSE55267"t"GSE55267:0000000:56"t"GSM1333046"t"GSM1332984"
"GSE55267"t"GSE55267:0000000:57"t"GSM1333047"t"GSM1332984"
"GSE55267"t"GSE55267:0000000:58"t"GSM1333048"t"GSM1332984"
"GSE55267"t"GSE55267:0000000:59"t"GSM1333049"t"GSM1332984"
"GSE55267"t"GSE55267:0000000:60"t"GSM1333050"t"GSM1332984"
"GSE55267"t"GSE55267:0000000:61"t"GSM1333051"t"GSM1332984"
"GSE55267"t"GSE55267:0000000:62"t"GSM1333052"t"GSM1332984"
"GSE55269"t"GSE55269:0:1"t"GSM1333057;GSM1333058"t"GSM1333055;GSM1333056"
"GSE55269"t"GSE55269:1:1"t"GSM1333061;GSM1333062"t"GSM1333059;GSM1333060"
"GSE55283"t"GSE55283:1:2"t"GSM1333411"t"GSM1333410"
"GSE55283"t"GSE55283:2:2"t"GSM1333413"t"GSM1333412"
"GSE55284"t"GSE55284:0000000:1"t"GSM1333416"t"GSM1333415"
"GSE55284"t"GSE55284:0000000:2"t"GSM1333417"t"GSM1333415"
"GSE55510"t"GSE55510:0000000:1"t"GSM1338376;GSM1338377;GSM1338378;GSM1338379"t"GSM1338372;GSM1338373;GSM1338374;GSM1338375"
"GSE55512"t"GSE55512:0000000:01"t"GSM1338405"t"GSM1338404"
"GSE55512"t"GSE55512:0000000:02"t"GSM1338406"t"GSM1338404"
"GSE55512"t"GSE55512:0000000:03"t"GSM1338407"t"GSM1338404"
"GSE55512"t"GSE55512:0000000:04"t"GSM1338408"t"GSM1338404"
"GSE55512"t"GSE55512:0000000:05"t"GSM1338409"t"GSM1338404"
"GSE55512"t"GSE55512:0000000:06"t"GSM1338410"t"GSM1338404"
"GSE55512"t"GSE55512:0000000:07"t"GSM1338411"t"GSM1338404"
"GSE55512"t"GSE55512:0000000:08"t"GSM1338412"t"GSM1338404"
"GSE55512"t"GSE55512:0000000:09"t"GSM1338413"t"GSM1338404"
"GSE55512"t"GSE55512:0000000:10"t"GSM1338414"t"GSM1338404"
"GSE55512"t"GSE55512:0000000:11"t"GSM1338415"t"GSM1338404"
"GSE55529"t"GSE55529:1:1"t"GSM1338710;GSM1338712;GSM1338714"t"GSM1338709;GSM1338711;GSM1338713"
"GSE55529"t"GSE55529:2:1"t"GSM1338716;GSM1338718;GSM1338720;GSM1338722"t"GSM1338715;GSM1338717;GSM1338719;GSM1338721"
"GSE55539"t"GSE55539:0000000:1"t"GSM1338904;GSM1338905;GSM1338906"t"GSM1338901;GSM1338902;GSM1338903"
"GSE55541"t"GSE55541:0000000:1"t"GSM1338917;GSM1338918"t"GSM1338914;GSM1338915;GSM1338916"
"GSE55541"t"GSE55541:0000000:2"t"GSM1338919;GSM1338920;GSM1338921"t"GSM1338914;GSM1338915;GSM1338916"
"GSE55541"t"GSE55541:0000000:3"t"GSM1338922;GSM1338923;GSM1338924"t"GSM1338914;GSM1338915;GSM1338916"
"GSE55541"t"GSE55541:0000000:4"t"GSM1338925;GSM1338926"t"GSM1338914;GSM1338915;GSM1338916"
"GSE55541"t"GSE55541:0000000:5"t"GSM1338927;GSM1338928;GSM1338929"t"GSM1338914;GSM1338915;GSM1338916"
"GSE55604"t"GSE55604:0:1"t"GSM1340086"t"GSM1340083"
"GSE55604"t"GSE55604:1:1"t"GSM1340087"t"GSM1340084"
"GSE55604"t"GSE55604:2:1"t"GSM1340088"t"GSM1340085"
"GSE55609"t"GSE55609:0000000:01"t"GSM1340137"t"GSM1340136"
"GSE55609"t"GSE55609:0000000:02"t"GSM1340138"t"GSM1340136"
"GSE55609"t"GSE55609:0000000:03"t"GSM1340139"t"GSM1340136"
"GSE55609"t"GSE55609:0000000:04"t"GSM1340140"t"GSM1340136"
"GSE55609"t"GSE55609:0000000:05"t"GSM1340141"t"GSM1340136"
"GSE55609"t"GSE55609:0000000:06"t"GSM1340142"t"GSM1340136"
"GSE55609"t"GSE55609:0000000:07"t"GSM1340143"t"GSM1340136"
"GSE55609"t"GSE55609:0000000:08"t"GSM1340144"t"GSM1340136"
"GSE55609"t"GSE55609:0000000:09"t"GSM1340145"t"GSM1340136"
"GSE55609"t"GSE55609:0000000:10"t"GSM1340146"t"GSM1340136"
"GSE55609"t"GSE55609:0000000:11"t"GSM1340147"t"GSM1340136"
"GSE55609"t"GSE55609:0000000:12"t"GSM1340148"t"GSM1340136"
"GSE55609"t"GSE55609:0000000:13"t"GSM1340149"t"GSM1340136"
"GSE55609"t"GSE55609:0000000:14"t"GSM1340150"t"GSM1340136"
"GSE55609"t"GSE55609:0000000:15"t"GSM1340151"t"GSM1340136"
"GSE55609"t"GSE55609:0000000:16"t"GSM1340152"t"GSM1340136"
"GSE55609"t"GSE55609:0000000:17"t"GSM1340153"t"GSM1340136"
"GSE55609"t"GSE55609:0000000:18"t"GSM1340154"t"GSM1340136"
"GSE55609"t"GSE55609:0000000:19"t"GSM1340155"t"GSM1340136"
"GSE55609"t"GSE55609:0000000:20"t"GSM1340156"t"GSM1340136"
"GSE55609"t"GSE55609:0000000:21"t"GSM1340157"t"GSM1340136"
"GSE55609"t"GSE55609:0000000:22"t"GSM1340158"t"GSM1340136"
"GSE55609"t"GSE55609:0000000:23"t"GSM1340159"t"GSM1340136"
"GSE55624"t"GSE55624:1:1"t"GSM1340525;GSM1340526"t"GSM1340523;GSM1340524"
"GSE55624"t"GSE55624:1:2"t"GSM1340527;GSM1340528"t"GSM1340523;GSM1340524"
"GSE55624"t"GSE55624:1:3"t"GSM1340529;GSM1340530"t"GSM1340523;GSM1340524"
"GSE55624"t"GSE55624:2:1"t"GSM1340533;GSM1340534"t"GSM1340531;GSM1340532"
"GSE55624"t"GSE55624:2:2"t"GSM1340535;GSM1340536"t"GSM1340531;GSM1340532"
"GSE55624"t"GSE55624:2:3"t"GSM1340537;GSM1340538"t"GSM1340531;GSM1340532"
"GSE55650"t"GSE55650:1:1"t"GSM1341147;GSM1341148;GSM1341149;GSM1341150;GSM1341151;GSM1341152"t"GSM1341141;GSM1341142;GSM1341143;GSM1341144;GSM1341145;GSM1341146"
"GSE55650"t"GSE55650:2:1"t"GSM1341158;GSM1341159;GSM1341160;GSM1341161;GSM1341162;GSM1341163"t"GSM1341153;GSM1341154;GSM1341155;GSM1341156;GSM1341157"
"GSE55667"t"GSE55667:0000000:1"t"GSM1341423;GSM1341424"t"GSM1341421;GSM1341422;GSM1341427;GSM1341428"
"GSE55667"t"GSE55667:0000000:2"t"GSM1341425;GSM1341426"t"GSM1341421;GSM1341422;GSM1341427;GSM1341428"
"GSE55667"t"GSE55667:0000000:3"t"GSM1341429;GSM1341430"t"GSM1341421;GSM1341422;GSM1341427;GSM1341428"
"GSE55667"t"GSE55667:0000000:4"t"GSM1341431;GSM1341432"t"GSM1341421;GSM1341422;GSM1341427;GSM1341428"
"GSE55673"t"GSE55673:0000000:1"t"GSM1341463;GSM1341464;GSM1341465;GSM1341466;GSM1341471;GSM1341472;GSM1341473;GSM1341474"t"GSM1341459;GSM1341460;GSM1341461;GSM1341462"
"GSE55673"t"GSE55673:0000000:2"t"GSM1341467;GSM1341468;GSM1341469;GSM1341470"t"GSM1341459;GSM1341460;GSM1341461;GSM1341462"
"GSE55810"t"GSE55810:1:1"t"GSM1346296"t"GSM1346297"
"GSE55810"t"GSE55810:1:2"t"GSM1346298"t"GSM1346297"
"GSE55810"t"GSE55810:1:3"t"GSM1346299"t"GSM1346297"
"GSE55810"t"GSE55810:2:1"t"GSM1346301"t"GSM1346300"
"GSE55810"t"GSE55810:2:2"t"GSM1346302"t"GSM1346300"
"GSE55810"t"GSE55810:2:3"t"GSM1346303"t"GSM1346300"
"GSE55859"t"GSE55859:0000000:1"t"GSM1347631;GSM1347632;GSM1347633;GSM1347634"t"GSM1347627;GSM1347628;GSM1347629;GSM1347630"
"GSE56017"t"GSE56017:0:1"t"GSM1350444;GSM1350448;GSM1350452"t"GSM1350443;GSM1350447;GSM1350451;GSM1350457;GSM1350458;GSM1350459"
"GSE56017"t"GSE56017:1:2"t"GSM1350455"t"GSM1350445;GSM1350449;GSM1350453;GSM1350460;GSM1350461;GSM1350462"
"GSE56017"t"GSE56017:2:2"t"GSM1350456"t"GSM1350446;GSM1350450;GSM1350454;GSM1350463;GSM1350464;GSM1350465;GSM1350466"
"GSE56026"t"GSE56026:0000000:1"t"GSM1350711;GSM1350712;GSM1350713"t"GSM1350708;GSM1350709;GSM1350710"
"GSE56026"t"GSE56026:0000000:2"t"GSM1350714;GSM1350715;GSM1350716"t"GSM1350708;GSM1350709;GSM1350710"
"GSE56026"t"GSE56026:0000000:3"t"GSM1350717;GSM1350718;GSM1350719"t"GSM1350708;GSM1350709;GSM1350710"
"GSE56026"t"GSE56026:0000000:4"t"GSM1350721;GSM1350722;GSM1350725;GSM1350730;GSM1350734;GSM1350738;GSM1350748;GSM1350750;GSM1350752;GSM1350755;GSM1350760;GSM1350761;GSM1350764;GSM1350766;GSM1350767;GSM1350769;GSM1350773;GSM1350774;GSM1350775;GSM1350776;GSM1350777;GSM1350778"t"GSM1350708;GSM1350709;GSM1350710"
"GSE56026"t"GSE56026:0000000:5"t"GSM1350720;GSM1350723;GSM1350733;GSM1350735;GSM1350737;GSM1350740;GSM1350744;GSM1350745;GSM1350746;GSM1350749;GSM1350753;GSM1350754;GSM1350758;GSM1350765;GSM1350768;GSM1350771;GSM1350780;GSM1350782"t"GSM1350708;GSM1350709;GSM1350710"
"GSE56026"t"GSE56026:0000000:6"t"GSM1350724;GSM1350726;GSM1350731;GSM1350732;GSM1350736;GSM1350743;GSM1350756;GSM1350757;GSM1350759;GSM1350772;GSM1350779"t"GSM1350708;GSM1350709;GSM1350710"
"GSE56026"t"GSE56026:0000000:7"t"GSM1350727;GSM1350728;GSM1350729;GSM1350739;GSM1350741;GSM1350742;GSM1350747;GSM1350751;GSM1350762;GSM1350763;GSM1350770;GSM1350781"t"GSM1350708;GSM1350709;GSM1350710"
"GSE56037"t"GSE56037:0000000:1"t"GSM1351804;GSM1351805;GSM1351806"t"GSM1351807;GSM1351808;GSM1351809"
"GSE56049"t"GSE56049:0000000:1"t"GSM1354415;GSM1354416;GSM1354417"t"GSM1354412;GSM1354413;GSM1354414"
"GSE56049"t"GSE56049:0000000:2"t"GSM1354418;GSM1354419;GSM1354420"t"GSM1354412;GSM1354413;GSM1354414"
"GSE56049"t"GSE56049:0000000:3"t"GSM1354421;GSM1354422;GSM1354423"t"GSM1354412;GSM1354413;GSM1354414"
"GSE56078"t"GSE56078:0000000:1"t"GSM1354751"t"GSM1354750"
"GSE56078"t"GSE56078:0000000:2"t"GSM1354752"t"GSM1354750"
"GSE56078"t"GSE56078:0000000:3"t"GSM1354753"t"GSM1354750"
"GSE56078"t"GSE56078:0000000:4"t"GSM1354754"t"GSM1354750"
"GSE56084"t"GSE56084:0000000:1"t"GSM1354786;GSM1354787;GSM1354788"t"GSM1354783;GSM1354784;GSM1354785"
"GSE56090"t"GSE56090:0000000:1"t"GSM1354887"t"GSM1354886"
"GSE56102"t"GSE56102:0000000:1"t"GSM1355196;GSM1355197;GSM1355198"t"GSM1355193;GSM1355194;GSM1355195"
"GSE56112"t"GSE56112:0000000:1"t"GSM1356057;GSM1356058;GSM1356059"t"GSM1356054;GSM1356055;GSM1356056"
"GSE56112"t"GSE56112:0000000:2"t"GSM1356060;GSM1356061;GSM1356062"t"GSM1356054;GSM1356055;GSM1356056"
"GSE56168"t"GSE56168:0:1"t"GSM1356986;GSM1356987;GSM1356988;GSM1356989"t"GSM1357029;GSM1357030;GSM1357031"
"GSE56168"t"GSE56168:0:2"t"GSM1357010;GSM1357011;GSM1357012;GSM1357013"t"GSM1357029;GSM1357030;GSM1357031"
"GSE56168"t"GSE56168:1:1"t"GSM1356966;GSM1356967;GSM1356968;GSM1356969"t"GSM1357014;GSM1357015;GSM1357016"
"GSE56168"t"GSE56168:1:2"t"GSM1356990;GSM1356991;GSM1356992;GSM1356993"t"GSM1357014;GSM1357015;GSM1357016"
"GSE56168"t"GSE56168:2:1"t"GSM1356970;GSM1356971;GSM1356972;GSM1356973"t"GSM1357017;GSM1357018;GSM1357019"
"GSE56168"t"GSE56168:2:2"t"GSM1356994;GSM1356995;GSM1356996;GSM1356997"t"GSM1357017;GSM1357018;GSM1357019"
"GSE56168"t"GSE56168:3:1"t"GSM1356974;GSM1356975;GSM1356976;GSM1356977"t"GSM1357020;GSM1357021;GSM1357022"
"GSE56168"t"GSE56168:3:2"t"GSM1356998;GSM1356999;GSM1357000;GSM1357001"t"GSM1357020;GSM1357021;GSM1357022"
"GSE56168"t"GSE56168:4:1"t"GSM1356978;GSM1356979;GSM1356980;GSM1356981"t"GSM1357023;GSM1357024;GSM1357025"
"GSE56168"t"GSE56168:4:2"t"GSM1357002;GSM1357003;GSM1357004;GSM1357005"t"GSM1357023;GSM1357024;GSM1357025"
"GSE56168"t"GSE56168:5:1"t"GSM1356982;GSM1356983;GSM1356984;GSM1356985"t"GSM1357026;GSM1357027;GSM1357028"
"GSE56168"t"GSE56168:5:2"t"GSM1357006;GSM1357007;GSM1357008;GSM1357009"t"GSM1357026;GSM1357027;GSM1357028"
"GSE56177"t"GSE56177:1:1"t"GSM1357184"t"GSM1357183"
"GSE56177"t"GSE56177:2:1"t"GSM1357186"t"GSM1357185"
"GSE56177"t"GSE56177:3:1"t"GSM1357188"t"GSM1357187"
"GSE56177"t"GSE56177:4:1"t"GSM1357190"t"GSM1357189"
"GSE56237"t"GSE56237:0000000:01"t"GSM1357472"t"GSM1357471"
"GSE56237"t"GSE56237:0000000:02"t"GSM1357473"t"GSM1357471"
"GSE56237"t"GSE56237:0000000:03"t"GSM1357474"t"GSM1357471"
"GSE56237"t"GSE56237:0000000:04"t"GSM1357475"t"GSM1357471"
"GSE56237"t"GSE56237:0000000:05"t"GSM1357476"t"GSM1357471"
"GSE56237"t"GSE56237:0000000:06"t"GSM1357477"t"GSM1357471"
"GSE56237"t"GSE56237:0000000:07"t"GSM1357478"t"GSM1357471"
"GSE56237"t"GSE56237:0000000:08"t"GSM1357479"t"GSM1357471"
"GSE56237"t"GSE56237:0000000:09"t"GSM1357480"t"GSM1357471"
"GSE56237"t"GSE56237:0000000:10"t"GSM1357481"t"GSM1357471"
"GSE56237"t"GSE56237:0000000:11"t"GSM1357482"t"GSM1357471"
"GSE56237"t"GSE56237:0000000:12"t"GSM1357483"t"GSM1357471"
"GSE56237"t"GSE56237:0000000:13"t"GSM1357484"t"GSM1357471"
"GSE56237"t"GSE56237:0000000:14"t"GSM1357485"t"GSM1357471"
"GSE56237"t"GSE56237:0000000:15"t"GSM1357486"t"GSM1357471"
"GSE56237"t"GSE56237:0000000:16"t"GSM1357487"t"GSM1357471"
"GSE56237"t"GSE56237:0000000:17"t"GSM1357488"t"GSM1357471"
"GSE56237"t"GSE56237:0000000:18"t"GSM1357489"t"GSM1357471"
"GSE56237"t"GSE56237:0000000:19"t"GSM1357490"t"GSM1357471"
"GSE56237"t"GSE56237:0000000:20"t"GSM1357491"t"GSM1357471"
"GSE56239"t"GSE56239:1:1"t"GSM1357507;GSM1357508"t"GSM1357505;GSM1357506"
"GSE56239"t"GSE56239:2:1"t"GSM1357511;GSM1357512"t"GSM1357509;GSM1357510"
"GSE56239"t"GSE56239:3:1"t"GSM1357515;GSM1357516"t"GSM1357513;GSM1357514"
"GSE56265"t"GSE56265:1:1"t"GSM1357972;GSM1357973"t"GSM1357970;GSM1357971"
"GSE56265"t"GSE56265:2:1"t"GSM1357976;GSM1357977"t"GSM1357974;GSM1357975"
"GSE56265"t"GSE56265:3:1"t"GSM1357980;GSM1357981"t"GSM1357978;GSM1357979"
"GSE56268"t"GSE56268:0:1"t"GSM1358013;GSM1358014;GSM1358015;GSM1358016;GSM1358017;GSM1358018"t"GSM1358007;GSM1358008;GSM1358009;GSM1358010;GSM1358011;GSM1358012"
"GSE56268"t"GSE56268:2:1"t"GSM1358025;GSM1358026;GSM1358027;GSM1358028;GSM1358029;GSM1358030"t"GSM1358019;GSM1358020;GSM1358021;GSM1358022;GSM1358023;GSM1358024"
"GSE56313"t"GSE56313:0000000:01"t"GSM1358940"t"GSM1358939"
"GSE56313"t"GSE56313:0000000:02"t"GSM1358941"t"GSM1358939"
"GSE56313"t"GSE56313:0000000:03"t"GSM1358942"t"GSM1358939"
"GSE56313"t"GSE56313:0000000:04"t"GSM1358943"t"GSM1358939"
"GSE56313"t"GSE56313:0000000:05"t"GSM1358944"t"GSM1358939"
"GSE56313"t"GSE56313:0000000:06"t"GSM1358945"t"GSM1358939"
"GSE56313"t"GSE56313:0000000:07"t"GSM1358946"t"GSM1358939"
"GSE56313"t"GSE56313:0000000:08"t"GSM1358947"t"GSM1358939"
"GSE56313"t"GSE56313:0000000:09"t"GSM1358948"t"GSM1358939"
"GSE56313"t"GSE56313:0000000:10"t"GSM1358949"t"GSM1358939"
"GSE56313"t"GSE56313:0000000:11"t"GSM1358950"t"GSM1358939"
"GSE56313"t"GSE56313:0000000:12"t"GSM1358951"t"GSM1358939"
"GSE56313"t"GSE56313:0000000:13"t"GSM1358952"t"GSM1358939"
"GSE56313"t"GSE56313:0000000:14"t"GSM1358953"t"GSM1358939"
"GSE56313"t"GSE56313:0000000:15"t"GSM1358954"t"GSM1358939"
"GSE56313"t"GSE56313:0000000:16"t"GSM1358955"t"GSM1358939"
"GSE56313"t"GSE56313:0000000:17"t"GSM1358956"t"GSM1358939"
"GSE56313"t"GSE56313:0000000:18"t"GSM1358957"t"GSM1358939"
"GSE56313"t"GSE56313:0000000:19"t"GSM1358958"t"GSM1358939"
"GSE56313"t"GSE56313:0000000:20"t"GSM1358959"t"GSM1358939"
"GSE56313"t"GSE56313:0000000:21"t"GSM1358960"t"GSM1358939"
"GSE56313"t"GSE56313:0000000:22"t"GSM1358961"t"GSM1358939"
"GSE56313"t"GSE56313:0000000:23"t"GSM1358962"t"GSM1358939"
"GSE56313"t"GSE56313:0000000:24"t"GSM1358963"t"GSM1358939"
"GSE56313"t"GSE56313:0000000:25"t"GSM1358964"t"GSM1358939"
"GSE56313"t"GSE56313:0000000:26"t"GSM1358965"t"GSM1358939"
"GSE56313"t"GSE56313:0000000:27"t"GSM1358966"t"GSM1358939"
"GSE56313"t"GSE56313:0000000:28"t"GSM1358967"t"GSM1358939"
"GSE56313"t"GSE56313:0000000:29"t"GSM1358968"t"GSM1358939"
"GSE56313"t"GSE56313:0000000:30"t"GSM1358969"t"GSM1358939"
"GSE56313"t"GSE56313:0000000:31"t"GSM1358970"t"GSM1358939"
"GSE56313"t"GSE56313:0000000:32"t"GSM1358971"t"GSM1358939"
"GSE56313"t"GSE56313:0000000:33"t"GSM1358972"t"GSM1358939"
"GSE56313"t"GSE56313:0000000:34"t"GSM1358973"t"GSM1358939"
"GSE56313"t"GSE56313:0000000:35"t"GSM1358974"t"GSM1358939"
"GSE56313"t"GSE56313:0000000:36"t"GSM1358975"t"GSM1358939"
"GSE56313"t"GSE56313:0000000:37"t"GSM1358976"t"GSM1358939"
"GSE56313"t"GSE56313:0000000:38"t"GSM1358977"t"GSM1358939"
"GSE56313"t"GSE56313:0000000:39"t"GSM1358978"t"GSM1358939"
"GSE56313"t"GSE56313:0000000:40"t"GSM1358979"t"GSM1358939"
"GSE56313"t"GSE56313:0000000:41"t"GSM1358980"t"GSM1358939"
"GSE56313"t"GSE56313:0000000:42"t"GSM1358981"t"GSM1358939"
"GSE56313"t"GSE56313:0000000:43"t"GSM1358982"t"GSM1358939"
"GSE56313"t"GSE56313:0000000:44"t"GSM1358983"t"GSM1358939"
"GSE56313"t"GSE56313:0000000:45"t"GSM1358984"t"GSM1358939"
"GSE56313"t"GSE56313:0000000:46"t"GSM1358985"t"GSM1358939"
"GSE56313"t"GSE56313:0000000:47"t"GSM1358986"t"GSM1358939"
"GSE56313"t"GSE56313:0000000:48"t"GSM1358987"t"GSM1358939"
"GSE56313"t"GSE56313:0000000:49"t"GSM1358988"t"GSM1358939"
"GSE56313"t"GSE56313:0000000:50"t"GSM1358989"t"GSM1358939"
"GSE56313"t"GSE56313:0000000:51"t"GSM1358990"t"GSM1358939"
"GSE56313"t"GSE56313:0000000:52"t"GSM1358991"t"GSM1358939"
"GSE56313"t"GSE56313:0000000:53"t"GSM1358992"t"GSM1358939"
"GSE56313"t"GSE56313:0000000:54"t"GSM1358993"t"GSM1358939"
"GSE56313"t"GSE56313:0000000:55"t"GSM1358994"t"GSM1358939"
"GSE56313"t"GSE56313:0000000:56"t"GSM1358995"t"GSM1358939"
"GSE56313"t"GSE56313:0000000:57"t"GSM1358996"t"GSM1358939"
"GSE56313"t"GSE56313:0000000:58"t"GSM1358997"t"GSM1358939"
"GSE56313"t"GSE56313:0000000:59"t"GSM1358998"t"GSM1358939"
"GSE56313"t"GSE56313:0000000:60"t"GSM1358999"t"GSM1358939"
"GSE56313"t"GSE56313:0000000:61"t"GSM1359000"t"GSM1358939"
"GSE56313"t"GSE56313:0000000:62"t"GSM1359001"t"GSM1358939"
"GSE56313"t"GSE56313:0000000:63"t"GSM1359002"t"GSM1358939"
"GSE56313"t"GSE56313:0000000:64"t"GSM1359003"t"GSM1358939"
"GSE56313"t"GSE56313:0000000:65"t"GSM1359004"t"GSM1358939"
"GSE56313"t"GSE56313:0000000:66"t"GSM1359005"t"GSM1358939"
"GSE56313"t"GSE56313:0000000:67"t"GSM1359006"t"GSM1358939"
"GSE56313"t"GSE56313:0000000:68"t"GSM1359007"t"GSM1358939"
"GSE56313"t"GSE56313:0000000:69"t"GSM1359008"t"GSM1358939"
"GSE56313"t"GSE56313:0000000:70"t"GSM1359009"t"GSM1358939"
"GSE56313"t"GSE56313:0000000:71"t"GSM1359010"t"GSM1358939"
"GSE56313"t"GSE56313:0000000:72"t"GSM1359011"t"GSM1358939"
"GSE56313"t"GSE56313:0000000:73"t"GSM1359012"t"GSM1358939"
"GSE56313"t"GSE56313:0000000:74"t"GSM1359013"t"GSM1358939"
"GSE56313"t"GSE56313:0000000:75"t"GSM1359014"t"GSM1358939"
"GSE56313"t"GSE56313:0000000:76"t"GSM1359015"t"GSM1358939"
"GSE56313"t"GSE56313:0000000:77"t"GSM1359016"t"GSM1358939"
"GSE56313"t"GSE56313:0000000:78"t"GSM1359017"t"GSM1358939"
"GSE56313"t"GSE56313:0000000:79"t"GSM1359018"t"GSM1358939"
"GSE56313"t"GSE56313:0000000:80"t"GSM1359019"t"GSM1358939"
"GSE56313"t"GSE56313:0000000:81"t"GSM1359020"t"GSM1358939"
"GSE56313"t"GSE56313:0000000:82"t"GSM1359021"t"GSM1358939"
"GSE56313"t"GSE56313:0000000:83"t"GSM1359022"t"GSM1358939"
"GSE56313"t"GSE56313:0000000:84"t"GSM1359023"t"GSM1358939"
"GSE56313"t"GSE56313:0000000:85"t"GSM1359024"t"GSM1358939"
"GSE56313"t"GSE56313:0000000:86"t"GSM1359025"t"GSM1358939"
"GSE56313"t"GSE56313:0000000:87"t"GSM1359026"t"GSM1358939"
"GSE56313"t"GSE56313:0000000:88"t"GSM1359027"t"GSM1358939"
"GSE56314"t"GSE56314:1:1"t"GSM1359029;GSM1359030"t"GSM1359028"
"GSE56314"t"GSE56314:1:2"t"GSM1359031"t"GSM1359028"
"GSE56314"t"GSE56314:1:3"t"GSM1359032"t"GSM1359028"
"GSE56314"t"GSE56314:2:1"t"GSM1359034;GSM1359035"t"GSM1359033"
"GSE56314"t"GSE56314:2:2"t"GSM1359036"t"GSM1359033"
"GSE56314"t"GSE56314:2:3"t"GSM1359037"t"GSM1359033"
"GSE56314"t"GSE56314:3:1"t"GSM1359039;GSM1359040"t"GSM1359038"
"GSE56314"t"GSE56314:3:2"t"GSM1359041"t"GSM1359038"
"GSE56314"t"GSE56314:3:3"t"GSM1359042"t"GSM1359038"
"GSE56314"t"GSE56314:4:2"t"GSM1359045"t"GSM1359043;GSM1359044"
"GSE56314"t"GSE56314:4:3"t"GSM1359046"t"GSM1359043;GSM1359044"
"GSE56314"t"GSE56314:5:3"t"GSM1359048"t"GSM1359047"
"GSE56314"t"GSE56314:6:3"t"GSM1359051"t"GSM1359049;GSM1359050"
"GSE56314"t"GSE56314:7:1"t"GSM1359053;GSM1359054"t"GSM1359052"
"GSE56314"t"GSE56314:7:2"t"GSM1359055"t"GSM1359052"
"GSE56314"t"GSE56314:7:3"t"GSM1359056"t"GSM1359052"
"GSE56314"t"GSE56314:8:1"t"GSM1359058;GSM1359059"t"GSM1359057"
"GSE56314"t"GSE56314:8:2"t"GSM1359060"t"GSM1359057"
"GSE56352"t"GSE56352:1:1"t"GSM1359762;GSM1359763"t"GSM1359760;GSM1359761"
"GSE56352"t"GSE56352:1:2"t"GSM1359764;GSM1359765"t"GSM1359760;GSM1359761"
"GSE56352"t"GSE56352:2:1"t"GSM1359768;GSM1359769"t"GSM1359766;GSM1359767"
"GSE56352"t"GSE56352:2:2"t"GSM1359770;GSM1359771"t"GSM1359766;GSM1359767"
"GSE56352"t"GSE56352:3:1"t"GSM1359774;GSM1359775"t"GSM1359772;GSM1359773"
"GSE56352"t"GSE56352:3:2"t"GSM1359776;GSM1359777"t"GSM1359772;GSM1359773"
"GSE56352"t"GSE56352:4:1"t"GSM1359780;GSM1359781"t"GSM1359778;GSM1359779"
"GSE56352"t"GSE56352:4:2"t"GSM1359782;GSM1359783"t"GSM1359778;GSM1359779"
"GSE56410"t"GSE56410:0000000:1"t"GSM1361060"t"GSM1361058;GSM1361059"
"GSE56410"t"GSE56410:0000000:2"t"GSM1361061"t"GSM1361058;GSM1361059"
"GSE56410"t"GSE56410:0000000:3"t"GSM1361062"t"GSM1361058;GSM1361059"
"GSE56410"t"GSE56410:0000000:4"t"GSM1361063"t"GSM1361058;GSM1361059"
"GSE56410"t"GSE56410:0000000:5"t"GSM1361064"t"GSM1361058;GSM1361059"
"GSE56449"t"GSE56449:0000000:1"t"GSM1361679;GSM1361680;GSM1361681;GSM1361682;GSM1361683;GSM1361684"t"GSM1361694;GSM1361695;GSM1361696;GSM1361697;GSM1361698;GSM1361699;GSM1361700;GSM1361701;GSM1361702;GSM1361703;GSM1361704;GSM1361705;GSM1361706;GSM1361707;GSM1361708;GSM1361709;GSM1361710"
"GSE56449"t"GSE56449:0000000:2"t"GSM1361685;GSM1361686;GSM1361687;GSM1361688;GSM1361689;GSM1361690;GSM1361691;GSM1361692;GSM1361693"t"GSM1361694;GSM1361695;GSM1361696;GSM1361697;GSM1361698;GSM1361699;GSM1361700;GSM1361701;GSM1361702;GSM1361703;GSM1361704;GSM1361705;GSM1361706;GSM1361707;GSM1361708;GSM1361709;GSM1361710"
"GSE56464"t"GSE56464:0000000:1"t"GSM1361903;GSM1361904;GSM1361905;GSM1361906"t"GSM1361899;GSM1361900;GSM1361901;GSM1361902"
"GSE56465"t"GSE56465:01:1"t"GSM1361925;GSM1361926"t"GSM1361907;GSM1361908"
"GSE56591"t"GSE56591:1:1"t"GSM1365128"t"GSM1365129"
"GSE56591"t"GSE56591:2:1"t"GSM1365130"t"GSM1365131"
"GSE56645"t"GSE56645:0000000:1"t"GSM1366329"t"GSM1366327;GSM1366328"
"GSE56645"t"GSE56645:0000000:2"t"GSM1366330"t"GSM1366327;GSM1366328"
"GSE56645"t"GSE56645:0000000:3"t"GSM1366331"t"GSM1366327;GSM1366328"
"GSE56670"t"GSE56670:0000000:01"t"GSM1366654"t"GSM1366653"
"GSE56670"t"GSE56670:0000000:02"t"GSM1366655"t"GSM1366653"
"GSE56670"t"GSE56670:0000000:03"t"GSM1366656"t"GSM1366653"
"GSE56670"t"GSE56670:0000000:04"t"GSM1366657"t"GSM1366653"
"GSE56670"t"GSE56670:0000000:05"t"GSM1366658"t"GSM1366653"
"GSE56670"t"GSE56670:0000000:06"t"GSM1366659"t"GSM1366653"
"GSE56670"t"GSE56670:0000000:07"t"GSM1366660"t"GSM1366653"
"GSE56670"t"GSE56670:0000000:08"t"GSM1366661"t"GSM1366653"
"GSE56670"t"GSE56670:0000000:09"t"GSM1366662"t"GSM1366653"
"GSE56670"t"GSE56670:0000000:10"t"GSM1366663"t"GSM1366653"
"GSE56670"t"GSE56670:0000000:11"t"GSM1366664"t"GSM1366653"
"GSE56670"t"GSE56670:0000000:12"t"GSM1366665"t"GSM1366653"
"GSE56670"t"GSE56670:0000000:13"t"GSM1366666"t"GSM1366653"
"GSE56670"t"GSE56670:0000000:14"t"GSM1366667"t"GSM1366653"
"GSE56670"t"GSE56670:0000000:15"t"GSM1366668"t"GSM1366653"
"GSE56670"t"GSE56670:0000000:16"t"GSM1366669"t"GSM1366653"
"GSE56670"t"GSE56670:0000000:17"t"GSM1366670"t"GSM1366653"
"GSE56670"t"GSE56670:0000000:18"t"GSM1366671"t"GSM1366653"
"GSE56670"t"GSE56670:0000000:19"t"GSM1366672"t"GSM1366653"
"GSE56681"t"GSE56681:0000000:1"t"GSM1366791;GSM1366793;GSM1366795"t"GSM1366783;GSM1366784;GSM1366785;GSM1366789"
"GSE56681"t"GSE56681:0000000:2"t"GSM1366786;GSM1366787;GSM1366788"t"GSM1366783;GSM1366784;GSM1366785;GSM1366789"
"GSE56681"t"GSE56681:0000000:3"t"GSM1366790;GSM1366792;GSM1366794"t"GSM1366783;GSM1366784;GSM1366785;GSM1366789"
"GSE56769"t"GSE56769:0000000:1"t"GSM1368812;GSM1368813"t"GSM1368811"
"GSE56808"t"GSE56808:0000000:1"t"GSM1369648;GSM1369649;GSM1369653;GSM1369655;GSM1369659"t"GSM1369642;GSM1369643;GSM1369644;GSM1369645;GSM1369646;GSM1369647"
"GSE56808"t"GSE56808:0000000:2"t"GSM1369650;GSM1369652;GSM1369654;GSM1369656;GSM1369657;GSM1369658"t"GSM1369642;GSM1369643;GSM1369644;GSM1369645;GSM1369646;GSM1369647"
"GSE56808"t"GSE56808:0000000:3"t"GSM1369651"t"GSM1369642;GSM1369643;GSM1369644;GSM1369645;GSM1369646;GSM1369647"
"GSE56843"t"GSE56843:0:1"t"GSM1370133;GSM1370134"t"GSM1370129;GSM1370130"
"GSE56843"t"GSE56843:1:1"t"GSM1370135;GSM1370136"t"GSM1370131;GSM1370132"
"GSE56896"t"GSE56896:0000000:1"t"GSM1370843;GSM1370844;GSM1370845"t"GSM1370840;GSM1370841;GSM1370842"
"GSE56906"t"GSE56906:1:1"t"GSM1371027;GSM1371028"t"GSM1371025;GSM1371026"
"GSE56906"t"GSE56906:2:1"t"GSM1371033;GSM1371034"t"GSM1371031;GSM1371032"
"GSE56936"t"GSE56936:0:1"t"GSM1371876;GSM1371879"t"GSM1371874;GSM1371878"
"GSE56936"t"GSE56936:1:1"t"GSM1371877"t"GSM1371875"
"GSE56940"t"GSE56940:0000000:1"t"GSM1372002;GSM1372003;GSM1372004"t"GSM1371999;GSM1372000;GSM1372001"
"GSE56954"t"GSE56954:1:1"t"GSM1372115;GSM1372116"t"GSM1372113;GSM1372114"
"GSE56954"t"GSE56954:2:1"t"GSM1372119;GSM1372120"t"GSM1372117;GSM1372118"
"GSE56967"t"GSE56967:0000000:1"t"GSM1372383;GSM1372384;GSM1372385"t"GSM1372386;GSM1372387;GSM1372388"
"GSE56972"t"GSE56972:0000000:1"t"GSM1372418;GSM1372419;GSM1372420"t"GSM1372421;GSM1372422;GSM1372423"
"GSE56973"t"GSE56973:1:1"t"GSM1499923;GSM1499924;GSM1499925"t"GSM1499926;GSM1499927;GSM1499928"
"GSE56973"t"GSE56973:2:1"t"GSM1499929;GSM1499930;GSM1499931"t"GSM1499932;GSM1499933;GSM1499934"
"GSE57051"t"GSE57051:0000000:1"t"GSM1373768;GSM1373769;GSM1373770;GSM1373771;GSM1373772;GSM1373773;GSM1373774;GSM1373775;GSM1373776;GSM1373777;GSM1373778;GSM1373779;GSM1373780;GSM1373781;GSM1373782;GSM1373783;GSM1373784;GSM1373785;GSM1373786;GSM1373787"t"GSM1373748;GSM1373749;GSM1373750;GSM1373751;GSM1373752;GSM1373753;GSM1373754;GSM1373755;GSM1373756;GSM1373757;GSM1373758;GSM1373759;GSM1373760;GSM1373761;GSM1373762;GSM1373763;GSM1373764;GSM1373765;GSM1373766;GSM1373767"
"GSE57065"t"GSE57065:01:2"t"GSM1373915;GSM1373942"t"GSM1373914;GSM1373941"
"GSE57065"t"GSE57065:01:3"t"GSM1373916;GSM1373943"t"GSM1373914;GSM1373941"
"GSE57065"t"GSE57065:02:2"t"GSM1373918;GSM1373971"t"GSM1373917;GSM1373970"
"GSE57065"t"GSE57065:02:3"t"GSM1373919;GSM1373972"t"GSM1373917;GSM1373970"
"GSE57065"t"GSE57065:03:1"t"GSM1373920"t"GSM1373997"
"GSE57065"t"GSE57065:03:2"t"GSM1373921"t"GSM1373997"
"GSE57065"t"GSE57065:03:3"t"GSM1373922"t"GSM1373997"
"GSE57065"t"GSE57065:04:1"t"GSM1373923"t"GSM1374007"
"GSE57065"t"GSE57065:04:2"t"GSM1373924"t"GSM1374007"
"GSE57065"t"GSE57065:04:3"t"GSM1373925"t"GSM1374007"
"GSE57065"t"GSE57065:05:1"t"GSM1373926"t"GSM1374017"
"GSE57065"t"GSE57065:05:2"t"GSM1373927"t"GSM1374017"
"GSE57065"t"GSE57065:05:3"t"GSM1373928"t"GSM1374017"
"GSE57065"t"GSE57065:06:2"t"GSM1373930"t"GSM1373929"
"GSE57065"t"GSE57065:06:3"t"GSM1373931"t"GSM1373929"
"GSE57065"t"GSE57065:07:2"t"GSM1373933"t"GSM1373932"
"GSE57065"t"GSE57065:07:3"t"GSM1373934"t"GSM1373932"
"GSE57065"t"GSE57065:08:2"t"GSM1373936"t"GSM1373935"
"GSE57065"t"GSE57065:08:3"t"GSM1373937"t"GSM1373935"
"GSE57065"t"GSE57065:09:2"t"GSM1373939"t"GSM1373938"
"GSE57065"t"GSE57065:09:3"t"GSM1373940"t"GSM1373938"
"GSE57065"t"GSE57065:11:2"t"GSM1373945"t"GSM1373944"
"GSE57065"t"GSE57065:11:3"t"GSM1373946"t"GSM1373944"
"GSE57065"t"GSE57065:12:2"t"GSM1373948"t"GSM1373947"
"GSE57065"t"GSE57065:12:3"t"GSM1373949"t"GSM1373947"
"GSE57065"t"GSE57065:13:2"t"GSM1373951"t"GSM1373950"
"GSE57065"t"GSE57065:13:3"t"GSM1373952"t"GSM1373950"
"GSE57065"t"GSE57065:14:2"t"GSM1373954"t"GSM1373953"
"GSE57065"t"GSE57065:14:3"t"GSM1373955"t"GSM1373953"
"GSE57065"t"GSE57065:15:2"t"GSM1373957"t"GSM1373956"
"GSE57065"t"GSE57065:15:3"t"GSM1373958"t"GSM1373956"
"GSE57065"t"GSE57065:16:2"t"GSM1373960"t"GSM1373959"
"GSE57065"t"GSE57065:16:3"t"GSM1373961"t"GSM1373959"
"GSE57065"t"GSE57065:17:2"t"GSM1373963"t"GSM1373962"
"GSE57065"t"GSE57065:17:3"t"GSM1373964"t"GSM1373962"
"GSE57065"t"GSE57065:18:2"t"GSM1373966"t"GSM1373965"
"GSE57065"t"GSE57065:19:2"t"GSM1373968"t"GSM1373967"
"GSE57065"t"GSE57065:19:3"t"GSM1373969"t"GSM1373967"
"GSE57065"t"GSE57065:21:2"t"GSM1373974"t"GSM1373973"
"GSE57065"t"GSE57065:21:3"t"GSM1373975"t"GSM1373973"
"GSE57065"t"GSE57065:22:2"t"GSM1373977"t"GSM1373976"
"GSE57065"t"GSE57065:22:3"t"GSM1373978"t"GSM1373976"
"GSE57065"t"GSE57065:23:2"t"GSM1373980"t"GSM1373979"
"GSE57065"t"GSE57065:24:2"t"GSM1373982"t"GSM1373981"
"GSE57065"t"GSE57065:24:3"t"GSM1373983"t"GSM1373981"
"GSE57065"t"GSE57065:25:2"t"GSM1373985"t"GSM1373984"
"GSE57065"t"GSE57065:25:3"t"GSM1373986"t"GSM1373984"
"GSE57065"t"GSE57065:26:2"t"GSM1373988"t"GSM1373987"
"GSE57065"t"GSE57065:26:3"t"GSM1373989"t"GSM1373987"
"GSE57065"t"GSE57065:27:2"t"GSM1373991"t"GSM1373990"
"GSE57065"t"GSE57065:27:3"t"GSM1373992"t"GSM1373990"
"GSE57065"t"GSE57065:28:2"t"GSM1373994"t"GSM1373993"
"GSE57065"t"GSE57065:28:3"t"GSM1373995"t"GSM1373993"
"GSE57083"t"GSE57083:0000000:001"t"GSM1374370"t"GSM1374369"
"GSE57083"t"GSE57083:0000000:002"t"GSM1374371"t"GSM1374369"
"GSE57083"t"GSE57083:0000000:003"t"GSM1374372"t"GSM1374369"
"GSE57083"t"GSE57083:0000000:004"t"GSM1374373"t"GSM1374369"
"GSE57083"t"GSE57083:0000000:005"t"GSM1374374"t"GSM1374369"
"GSE57083"t"GSE57083:0000000:006"t"GSM1374375"t"GSM1374369"
"GSE57083"t"GSE57083:0000000:007"t"GSM1374376"t"GSM1374369"
"GSE57083"t"GSE57083:0000000:008"t"GSM1374377"t"GSM1374369"
"GSE57083"t"GSE57083:0000000:009"t"GSM1374378"t"GSM1374369"
"GSE57083"t"GSE57083:0000000:010"t"GSM1374379"t"GSM1374369"
"GSE57083"t"GSE57083:0000000:011"t"GSM1374380"t"GSM1374369"
"GSE57083"t"GSE57083:0000000:012"t"GSM1374381"t"GSM1374369"
"GSE57083"t"GSE57083:0000000:013"t"GSM1374382"t"GSM1374369"
"GSE57083"t"GSE57083:0000000:014"t"GSM1374383"t"GSM1374369"
"GSE57083"t"GSE57083:0000000:015"t"GSM1374384"t"GSM1374369"
"GSE57083"t"GSE57083:0000000:016"t"GSM1374385"t"GSM1374369"
"GSE57083"t"GSE57083:0000000:017"t"GSM1374386"t"GSM1374369"
"GSE57083"t"GSE57083:0000000:018"t"GSM1374387"t"GSM1374369"
"GSE57083"t"GSE57083:0000000:019"t"GSM1374388"t"GSM1374369"
"GSE57083"t"GSE57083:0000000:020"t"GSM1374389"t"GSM1374369"
"GSE57083"t"GSE57083:0000000:021"t"GSM1374390"t"GSM1374369"
"GSE57083"t"GSE57083:0000000:022"t"GSM1374391"t"GSM1374369"
"GSE57083"t"GSE57083:0000000:023"t"GSM1374392"t"GSM1374369"
"GSE57083"t"GSE57083:0000000:024"t"GSM1374393"t"GSM1374369"
"GSE57083"t"GSE57083:0000000:025"t"GSM1374394"t"GSM1374369"
"GSE57083"t"GSE57083:0000000:026"t"GSM1374395"t"GSM1374369"
"GSE57083"t"GSE57083:0000000:027"t"GSM1374396"t"GSM1374369"
"GSE57083"t"GSE57083:0000000:028"t"GSM1374397"t"GSM1374369"
"GSE57083"t"GSE57083:0000000:029"t"GSM1374398"t"GSM1374369"
"GSE57083"t"GSE57083:0000000:030"t"GSM1374399"t"GSM1374369"
"GSE57083"t"GSE57083:0000000:031"t"GSM1374400"t"GSM1374369"
"GSE57083"t"GSE57083:0000000:032"t"GSM1374401"t"GSM1374369"
"GSE57083"t"GSE57083:0000000:033"t"GSM1374402"t"GSM1374369"
"GSE57083"t"GSE57083:0000000:034"t"GSM1374403"t"GSM1374369"
"GSE57083"t"GSE57083:0000000:035"t"GSM1374404"t"GSM1374369"
"GSE57083"t"GSE57083:0000000:036"t"GSM1374405"t"GSM1374369"
"GSE57083"t"GSE57083:0000000:037"t"GSM1374406"t"GSM1374369"
"GSE57083"t"GSE57083:0000000:038"t"GSM1374407"t"GSM1374369"
"GSE57083"t"GSE57083:0000000:039"t"GSM1374408"t"GSM1374369"
"GSE57083"t"GSE57083:0000000:040"t"GSM1374409"t"GSM1374369"
"GSE57083"t"GSE57083:0000000:041"t"GSM1374410"t"GSM1374369"
"GSE57083"t"GSE57083:0000000:042"t"GSM1374411"t"GSM1374369"
"GSE57083"t"GSE57083:0000000:043"t"GSM1374412"t"GSM1374369"
"GSE57083"t"GSE57083:0000000:044"t"GSM1374413"t"GSM1374369"
"GSE57083"t"GSE57083:0000000:045"t"GSM1374414"t"GSM1374369"
"GSE57083"t"GSE57083:0000000:046"t"GSM1374415"t"GSM1374369"
"GSE57083"t"GSE57083:0000000:047"t"GSM1374416"t"GSM1374369"
"GSE57083"t"GSE57083:0000000:048"t"GSM1374417"t"GSM1374369"
"GSE57083"t"GSE57083:0000000:049"t"GSM1374418"t"GSM1374369"
"GSE57083"t"GSE57083:0000000:050"t"GSM1374419"t"GSM1374369"
"GSE57083"t"GSE57083:0000000:051"t"GSM1374420"t"GSM1374369"
"GSE57083"t"GSE57083:0000000:052"t"GSM1374421"t"GSM1374369"
"GSE57083"t"GSE57083:0000000:053"t"GSM1374422"t"GSM1374369"
"GSE57083"t"GSE57083:0000000:054"t"GSM1374423"t"GSM1374369"
"GSE57083"t"GSE57083:0000000:055"t"GSM1374424"t"GSM1374369"
"GSE57083"t"GSE57083:0000000:056"t"GSM1374425"t"GSM1374369"
"GSE57083"t"GSE57083:0000000:057"t"GSM1374426"t"GSM1374369"
"GSE57083"t"GSE57083:0000000:058"t"GSM1374427"t"GSM1374369"
"GSE57083"t"GSE57083:0000000:059"t"GSM1374428"t"GSM1374369"
"GSE57083"t"GSE57083:0000000:060"t"GSM1374429"t"GSM1374369"
"GSE57083"t"GSE57083:0000000:061"t"GSM1374430"t"GSM1374369"
"GSE57083"t"GSE57083:0000000:062"t"GSM1374431"t"GSM1374369"
"GSE57083"t"GSE57083:0000000:063"t"GSM1374432"t"GSM1374369"
"GSE57083"t"GSE57083:0000000:064"t"GSM1374433"t"GSM1374369"
"GSE57083"t"GSE57083:0000000:065"t"GSM1374434"t"GSM1374369"
"GSE57083"t"GSE57083:0000000:066"t"GSM1374435"t"GSM1374369"
"GSE57083"t"GSE57083:0000000:067"t"GSM1374436"t"GSM1374369"
"GSE57083"t"GSE57083:0000000:068"t"GSM1374437"t"GSM1374369"
"GSE57083"t"GSE57083:0000000:069"t"GSM1374438"t"GSM1374369"
"GSE57083"t"GSE57083:0000000:070"t"GSM1374439"t"GSM1374369"
"GSE57083"t"GSE57083:0000000:071"t"GSM1374440"t"GSM1374369"
"GSE57083"t"GSE57083:0000000:072"t"GSM1374441"t"GSM1374369"
"GSE57083"t"GSE57083:0000000:073"t"GSM1374442"t"GSM1374369"
"GSE57083"t"GSE57083:0000000:074"t"GSM1374443"t"GSM1374369"
"GSE57083"t"GSE57083:0000000:075"t"GSM1374444"t"GSM1374369"
"GSE57083"t"GSE57083:0000000:076"t"GSM1374445"t"GSM1374369"
"GSE57083"t"GSE57083:0000000:077"t"GSM1374446"t"GSM1374369"
"GSE57083"t"GSE57083:0000000:078"t"GSM1374447"t"GSM1374369"
"GSE57083"t"GSE57083:0000000:079"t"GSM1374448"t"GSM1374369"
"GSE57083"t"GSE57083:0000000:080"t"GSM1374449"t"GSM1374369"
"GSE57083"t"GSE57083:0000000:081"t"GSM1374450"t"GSM1374369"
"GSE57083"t"GSE57083:0000000:082"t"GSM1374451"t"GSM1374369"
"GSE57083"t"GSE57083:0000000:083"t"GSM1374452"t"GSM1374369"
"GSE57083"t"GSE57083:0000000:084"t"GSM1374453"t"GSM1374369"
"GSE57083"t"GSE57083:0000000:085"t"GSM1374454"t"GSM1374369"
"GSE57083"t"GSE57083:0000000:086"t"GSM1374455"t"GSM1374369"
"GSE57083"t"GSE57083:0000000:087"t"GSM1374456"t"GSM1374369"
"GSE57083"t"GSE57083:0000000:088"t"GSM1374457"t"GSM1374369"
"GSE57083"t"GSE57083:0000000:089"t"GSM1374458"t"GSM1374369"
"GSE57083"t"GSE57083:0000000:090"t"GSM1374459"t"GSM1374369"
"GSE57083"t"GSE57083:0000000:091"t"GSM1374460"t"GSM1374369"
"GSE57083"t"GSE57083:0000000:092"t"GSM1374461"t"GSM1374369"
"GSE57083"t"GSE57083:0000000:093"t"GSM1374462"t"GSM1374369"
"GSE57083"t"GSE57083:0000000:094"t"GSM1374463"t"GSM1374369"
"GSE57083"t"GSE57083:0000000:095"t"GSM1374464"t"GSM1374369"
"GSE57083"t"GSE57083:0000000:096"t"GSM1374465"t"GSM1374369"
"GSE57083"t"GSE57083:0000000:097"t"GSM1374466"t"GSM1374369"
"GSE57083"t"GSE57083:0000000:098"t"GSM1374467"t"GSM1374369"
"GSE57083"t"GSE57083:0000000:099"t"GSM1374468"t"GSM1374369"
"GSE57083"t"GSE57083:0000000:100"t"GSM1374469"t"GSM1374369"
"GSE57083"t"GSE57083:0000000:101"t"GSM1374470"t"GSM1374369"
"GSE57083"t"GSE57083:0000000:102"t"GSM1374471"t"GSM1374369"
"GSE57083"t"GSE57083:0000000:103"t"GSM1374472"t"GSM1374369"
"GSE57083"t"GSE57083:0000000:104"t"GSM1374473"t"GSM1374369"
"GSE57083"t"GSE57083:0000000:105"t"GSM1374474"t"GSM1374369"
"GSE57083"t"GSE57083:0000000:106"t"GSM1374475"t"GSM1374369"
"GSE57083"t"GSE57083:0000000:107"t"GSM1374476"t"GSM1374369"
"GSE57083"t"GSE57083:0000000:108"t"GSM1374477"t"GSM1374369"
"GSE57083"t"GSE57083:0000000:109"t"GSM1374478"t"GSM1374369"
"GSE57083"t"GSE57083:0000000:110"t"GSM1374479"t"GSM1374369"
"GSE57083"t"GSE57083:0000000:111"t"GSM1374480"t"GSM1374369"
"GSE57083"t"GSE57083:0000000:112"t"GSM1374481"t"GSM1374369"
"GSE57083"t"GSE57083:0000000:113"t"GSM1374482"t"GSM1374369"
"GSE57083"t"GSE57083:0000000:114"t"GSM1374483"t"GSM1374369"
"GSE57083"t"GSE57083:0000000:115"t"GSM1374484"t"GSM1374369"
"GSE57083"t"GSE57083:0000000:116"t"GSM1374485"t"GSM1374369"
"GSE57083"t"GSE57083:0000000:117"t"GSM1374486"t"GSM1374369"
"GSE57083"t"GSE57083:0000000:118"t"GSM1374487"t"GSM1374369"
"GSE57083"t"GSE57083:0000000:119"t"GSM1374488"t"GSM1374369"
"GSE57083"t"GSE57083:0000000:120"t"GSM1374489"t"GSM1374369"
"GSE57083"t"GSE57083:0000000:121"t"GSM1374490"t"GSM1374369"
"GSE57083"t"GSE57083:0000000:122"t"GSM1374491"t"GSM1374369"
"GSE57083"t"GSE57083:0000000:123"t"GSM1374492"t"GSM1374369"
"GSE57083"t"GSE57083:0000000:124"t"GSM1374493"t"GSM1374369"
"GSE57083"t"GSE57083:0000000:125"t"GSM1374494"t"GSM1374369"
"GSE57083"t"GSE57083:0000000:126"t"GSM1374495"t"GSM1374369"
"GSE57083"t"GSE57083:0000000:127"t"GSM1374496"t"GSM1374369"
"GSE57083"t"GSE57083:0000000:128"t"GSM1374497"t"GSM1374369"
"GSE57083"t"GSE57083:0000000:129"t"GSM1374498"t"GSM1374369"
"GSE57083"t"GSE57083:0000000:130"t"GSM1374499"t"GSM1374369"
"GSE57083"t"GSE57083:0000000:131"t"GSM1374500"t"GSM1374369"
"GSE57083"t"GSE57083:0000000:132"t"GSM1374501"t"GSM1374369"
"GSE57083"t"GSE57083:0000000:133"t"GSM1374502"t"GSM1374369"
"GSE57083"t"GSE57083:0000000:134"t"GSM1374503"t"GSM1374369"
"GSE57083"t"GSE57083:0000000:135"t"GSM1374504"t"GSM1374369"
"GSE57083"t"GSE57083:0000000:136"t"GSM1374505"t"GSM1374369"
"GSE57083"t"GSE57083:0000000:137"t"GSM1374506"t"GSM1374369"
"GSE57083"t"GSE57083:0000000:138"t"GSM1374507"t"GSM1374369"
"GSE57083"t"GSE57083:0000000:139"t"GSM1374508"t"GSM1374369"
"GSE57083"t"GSE57083:0000000:140"t"GSM1374509"t"GSM1374369"
"GSE57083"t"GSE57083:0000000:141"t"GSM1374510"t"GSM1374369"
"GSE57083"t"GSE57083:0000000:142"t"GSM1374511"t"GSM1374369"
"GSE57083"t"GSE57083:0000000:143"t"GSM1374512"t"GSM1374369"
"GSE57083"t"GSE57083:0000000:144"t"GSM1374513"t"GSM1374369"
"GSE57083"t"GSE57083:0000000:145"t"GSM1374514"t"GSM1374369"
"GSE57083"t"GSE57083:0000000:146"t"GSM1374515"t"GSM1374369"
"GSE57083"t"GSE57083:0000000:147"t"GSM1374516"t"GSM1374369"
"GSE57083"t"GSE57083:0000000:148"t"GSM1374517"t"GSM1374369"
"GSE57083"t"GSE57083:0000000:149"t"GSM1374518"t"GSM1374369"
"GSE57083"t"GSE57083:0000000:150"t"GSM1374519"t"GSM1374369"
"GSE57083"t"GSE57083:0000000:151"t"GSM1374520"t"GSM1374369"
"GSE57083"t"GSE57083:0000000:152"t"GSM1374521"t"GSM1374369"
"GSE57083"t"GSE57083:0000000:153"t"GSM1374522"t"GSM1374369"
"GSE57083"t"GSE57083:0000000:154"t"GSM1374523"t"GSM1374369"
"GSE57083"t"GSE57083:0000000:155"t"GSM1374524"t"GSM1374369"
"GSE57083"t"GSE57083:0000000:156"t"GSM1374525"t"GSM1374369"
"GSE57083"t"GSE57083:0000000:157"t"GSM1374526"t"GSM1374369"
"GSE57083"t"GSE57083:0000000:158"t"GSM1374527"t"GSM1374369"
"GSE57083"t"GSE57083:0000000:159"t"GSM1374528"t"GSM1374369"
"GSE57083"t"GSE57083:0000000:160"t"GSM1374529"t"GSM1374369"
"GSE57083"t"GSE57083:0000000:161"t"GSM1374530"t"GSM1374369"
"GSE57083"t"GSE57083:0000000:162"t"GSM1374531"t"GSM1374369"
"GSE57083"t"GSE57083:0000000:163"t"GSM1374532"t"GSM1374369"
"GSE57083"t"GSE57083:0000000:164"t"GSM1374533"t"GSM1374369"
"GSE57083"t"GSE57083:0000000:165"t"GSM1374534"t"GSM1374369"
"GSE57083"t"GSE57083:0000000:166"t"GSM1374535"t"GSM1374369"
"GSE57083"t"GSE57083:0000000:167"t"GSM1374536"t"GSM1374369"
"GSE57083"t"GSE57083:0000000:168"t"GSM1374537"t"GSM1374369"
"GSE57083"t"GSE57083:0000000:169"t"GSM1374538"t"GSM1374369"
"GSE57083"t"GSE57083:0000000:170"t"GSM1374539"t"GSM1374369"
"GSE57083"t"GSE57083:0000000:171"t"GSM1374540"t"GSM1374369"
"GSE57083"t"GSE57083:0000000:172"t"GSM1374541"t"GSM1374369"
"GSE57083"t"GSE57083:0000000:173"t"GSM1374542"t"GSM1374369"
"GSE57083"t"GSE57083:0000000:174"t"GSM1374543"t"GSM1374369"
"GSE57083"t"GSE57083:0000000:175"t"GSM1374544"t"GSM1374369"
"GSE57083"t"GSE57083:0000000:176"t"GSM1374545"t"GSM1374369"
"GSE57083"t"GSE57083:0000000:177"t"GSM1374546"t"GSM1374369"
"GSE57083"t"GSE57083:0000000:178"t"GSM1374547"t"GSM1374369"
"GSE57083"t"GSE57083:0000000:179"t"GSM1374548"t"GSM1374369"
"GSE57083"t"GSE57083:0000000:180"t"GSM1374549"t"GSM1374369"
"GSE57083"t"GSE57083:0000000:181"t"GSM1374550"t"GSM1374369"
"GSE57083"t"GSE57083:0000000:182"t"GSM1374551"t"GSM1374369"
"GSE57083"t"GSE57083:0000000:183"t"GSM1374552"t"GSM1374369"
"GSE57083"t"GSE57083:0000000:184"t"GSM1374553"t"GSM1374369"
"GSE57083"t"GSE57083:0000000:185"t"GSM1374554"t"GSM1374369"
"GSE57083"t"GSE57083:0000000:186"t"GSM1374555"t"GSM1374369"
"GSE57083"t"GSE57083:0000000:187"t"GSM1374556"t"GSM1374369"
"GSE57083"t"GSE57083:0000000:188"t"GSM1374557"t"GSM1374369"
"GSE57083"t"GSE57083:0000000:189"t"GSM1374558"t"GSM1374369"
"GSE57083"t"GSE57083:0000000:190"t"GSM1374559"t"GSM1374369"
"GSE57083"t"GSE57083:0000000:191"t"GSM1374560"t"GSM1374369"
"GSE57083"t"GSE57083:0000000:192"t"GSM1374561"t"GSM1374369"
"GSE57083"t"GSE57083:0000000:193"t"GSM1374562"t"GSM1374369"
"GSE57083"t"GSE57083:0000000:194"t"GSM1374563"t"GSM1374369"
"GSE57083"t"GSE57083:0000000:195"t"GSM1374564"t"GSM1374369"
"GSE57083"t"GSE57083:0000000:196"t"GSM1374565"t"GSM1374369"
"GSE57083"t"GSE57083:0000000:197"t"GSM1374566"t"GSM1374369"
"GSE57083"t"GSE57083:0000000:198"t"GSM1374567"t"GSM1374369"
"GSE57083"t"GSE57083:0000000:199"t"GSM1374568"t"GSM1374369"
"GSE57083"t"GSE57083:0000000:200"t"GSM1374569"t"GSM1374369"
"GSE57083"t"GSE57083:0000000:201"t"GSM1374570"t"GSM1374369"
"GSE57083"t"GSE57083:0000000:202"t"GSM1374571"t"GSM1374369"
"GSE57083"t"GSE57083:0000000:203"t"GSM1374572"t"GSM1374369"
"GSE57083"t"GSE57083:0000000:204"t"GSM1374573"t"GSM1374369"
"GSE57083"t"GSE57083:0000000:205"t"GSM1374574"t"GSM1374369"
"GSE57083"t"GSE57083:0000000:206"t"GSM1374575"t"GSM1374369"
"GSE57083"t"GSE57083:0000000:207"t"GSM1374576"t"GSM1374369"
"GSE57083"t"GSE57083:0000000:208"t"GSM1374577"t"GSM1374369"
"GSE57083"t"GSE57083:0000000:209"t"GSM1374578"t"GSM1374369"
"GSE57083"t"GSE57083:0000000:210"t"GSM1374579"t"GSM1374369"
"GSE57083"t"GSE57083:0000000:211"t"GSM1374580"t"GSM1374369"
"GSE57083"t"GSE57083:0000000:212"t"GSM1374581"t"GSM1374369"
"GSE57083"t"GSE57083:0000000:213"t"GSM1374582"t"GSM1374369"
"GSE57083"t"GSE57083:0000000:214"t"GSM1374583"t"GSM1374369"
"GSE57083"t"GSE57083:0000000:215"t"GSM1374584"t"GSM1374369"
"GSE57083"t"GSE57083:0000000:216"t"GSM1374585"t"GSM1374369"
"GSE57083"t"GSE57083:0000000:217"t"GSM1374586"t"GSM1374369"
"GSE57083"t"GSE57083:0000000:218"t"GSM1374587"t"GSM1374369"
"GSE57083"t"GSE57083:0000000:219"t"GSM1374588"t"GSM1374369"
"GSE57083"t"GSE57083:0000000:220"t"GSM1374589"t"GSM1374369"
"GSE57083"t"GSE57083:0000000:221"t"GSM1374590"t"GSM1374369"
"GSE57083"t"GSE57083:0000000:222"t"GSM1374591"t"GSM1374369"
"GSE57083"t"GSE57083:0000000:223"t"GSM1374592"t"GSM1374369"
"GSE57083"t"GSE57083:0000000:224"t"GSM1374593"t"GSM1374369"
"GSE57083"t"GSE57083:0000000:225"t"GSM1374594"t"GSM1374369"
"GSE57083"t"GSE57083:0000000:226"t"GSM1374595"t"GSM1374369"
"GSE57083"t"GSE57083:0000000:227"t"GSM1374596"t"GSM1374369"
"GSE57083"t"GSE57083:0000000:228"t"GSM1374597"t"GSM1374369"
"GSE57083"t"GSE57083:0000000:229"t"GSM1374598"t"GSM1374369"
"GSE57083"t"GSE57083:0000000:230"t"GSM1374599"t"GSM1374369"
"GSE57083"t"GSE57083:0000000:231"t"GSM1374600"t"GSM1374369"
"GSE57083"t"GSE57083:0000000:232"t"GSM1374601"t"GSM1374369"
"GSE57083"t"GSE57083:0000000:233"t"GSM1374602"t"GSM1374369"
"GSE57083"t"GSE57083:0000000:234"t"GSM1374603"t"GSM1374369"
"GSE57083"t"GSE57083:0000000:235"t"GSM1374604"t"GSM1374369"
"GSE57083"t"GSE57083:0000000:236"t"GSM1374605"t"GSM1374369"
"GSE57083"t"GSE57083:0000000:237"t"GSM1374606"t"GSM1374369"
"GSE57083"t"GSE57083:0000000:238"t"GSM1374607"t"GSM1374369"
"GSE57083"t"GSE57083:0000000:239"t"GSM1374608"t"GSM1374369"
"GSE57083"t"GSE57083:0000000:240"t"GSM1374609"t"GSM1374369"
"GSE57083"t"GSE57083:0000000:241"t"GSM1374610"t"GSM1374369"
"GSE57083"t"GSE57083:0000000:242"t"GSM1374611"t"GSM1374369"
"GSE57083"t"GSE57083:0000000:243"t"GSM1374612"t"GSM1374369"
"GSE57083"t"GSE57083:0000000:244"t"GSM1374613"t"GSM1374369"
"GSE57083"t"GSE57083:0000000:245"t"GSM1374614"t"GSM1374369"
"GSE57083"t"GSE57083:0000000:246"t"GSM1374615"t"GSM1374369"
"GSE57083"t"GSE57083:0000000:247"t"GSM1374616"t"GSM1374369"
"GSE57083"t"GSE57083:0000000:248"t"GSM1374617"t"GSM1374369"
"GSE57083"t"GSE57083:0000000:249"t"GSM1374618"t"GSM1374369"
"GSE57083"t"GSE57083:0000000:250"t"GSM1374619"t"GSM1374369"
"GSE57083"t"GSE57083:0000000:251"t"GSM1374620"t"GSM1374369"
"GSE57083"t"GSE57083:0000000:252"t"GSM1374621"t"GSM1374369"
"GSE57083"t"GSE57083:0000000:253"t"GSM1374622"t"GSM1374369"
"GSE57083"t"GSE57083:0000000:254"t"GSM1374623"t"GSM1374369"
"GSE57083"t"GSE57083:0000000:255"t"GSM1374624"t"GSM1374369"
"GSE57083"t"GSE57083:0000000:256"t"GSM1374625"t"GSM1374369"
"GSE57083"t"GSE57083:0000000:257"t"GSM1374626"t"GSM1374369"
"GSE57083"t"GSE57083:0000000:258"t"GSM1374627"t"GSM1374369"
"GSE57083"t"GSE57083:0000000:259"t"GSM1374628"t"GSM1374369"
"GSE57083"t"GSE57083:0000000:260"t"GSM1374629"t"GSM1374369"
"GSE57083"t"GSE57083:0000000:261"t"GSM1374630"t"GSM1374369"
"GSE57083"t"GSE57083:0000000:262"t"GSM1374631"t"GSM1374369"
"GSE57083"t"GSE57083:0000000:263"t"GSM1374632"t"GSM1374369"
"GSE57083"t"GSE57083:0000000:264"t"GSM1374633"t"GSM1374369"
"GSE57083"t"GSE57083:0000000:265"t"GSM1374634"t"GSM1374369"
"GSE57083"t"GSE57083:0000000:266"t"GSM1374635"t"GSM1374369"
"GSE57083"t"GSE57083:0000000:267"t"GSM1374636"t"GSM1374369"
"GSE57083"t"GSE57083:0000000:268"t"GSM1374637"t"GSM1374369"
"GSE57083"t"GSE57083:0000000:269"t"GSM1374638"t"GSM1374369"
"GSE57083"t"GSE57083:0000000:270"t"GSM1374639"t"GSM1374369"
"GSE57083"t"GSE57083:0000000:271"t"GSM1374640"t"GSM1374369"
"GSE57083"t"GSE57083:0000000:272"t"GSM1374641"t"GSM1374369"
"GSE57083"t"GSE57083:0000000:273"t"GSM1374642"t"GSM1374369"
"GSE57083"t"GSE57083:0000000:274"t"GSM1374643"t"GSM1374369"
"GSE57083"t"GSE57083:0000000:275"t"GSM1374644"t"GSM1374369"
"GSE57083"t"GSE57083:0000000:276"t"GSM1374645"t"GSM1374369"
"GSE57083"t"GSE57083:0000000:277"t"GSM1374646"t"GSM1374369"
"GSE57083"t"GSE57083:0000000:278"t"GSM1374647"t"GSM1374369"
"GSE57083"t"GSE57083:0000000:279"t"GSM1374648"t"GSM1374369"
"GSE57083"t"GSE57083:0000000:280"t"GSM1374649"t"GSM1374369"
"GSE57083"t"GSE57083:0000000:281"t"GSM1374650"t"GSM1374369"
"GSE57083"t"GSE57083:0000000:282"t"GSM1374651"t"GSM1374369"
"GSE57083"t"GSE57083:0000000:283"t"GSM1374652"t"GSM1374369"
"GSE57083"t"GSE57083:0000000:284"t"GSM1374653"t"GSM1374369"
"GSE57083"t"GSE57083:0000000:285"t"GSM1374654"t"GSM1374369"
"GSE57083"t"GSE57083:0000000:286"t"GSM1374655"t"GSM1374369"
"GSE57083"t"GSE57083:0000000:287"t"GSM1374656"t"GSM1374369"
"GSE57083"t"GSE57083:0000000:288"t"GSM1374657"t"GSM1374369"
"GSE57083"t"GSE57083:0000000:289"t"GSM1374658"t"GSM1374369"
"GSE57083"t"GSE57083:0000000:290"t"GSM1374659"t"GSM1374369"
"GSE57083"t"GSE57083:0000000:291"t"GSM1374660"t"GSM1374369"
"GSE57083"t"GSE57083:0000000:292"t"GSM1374661"t"GSM1374369"
"GSE57083"t"GSE57083:0000000:293"t"GSM1374662"t"GSM1374369"
"GSE57083"t"GSE57083:0000000:294"t"GSM1374663"t"GSM1374369"
"GSE57083"t"GSE57083:0000000:295"t"GSM1374664"t"GSM1374369"
"GSE57083"t"GSE57083:0000000:296"t"GSM1374665"t"GSM1374369"
"GSE57083"t"GSE57083:0000000:297"t"GSM1374666"t"GSM1374369"
"GSE57083"t"GSE57083:0000000:298"t"GSM1374667"t"GSM1374369"
"GSE57083"t"GSE57083:0000000:299"t"GSM1374668"t"GSM1374369"
"GSE57083"t"GSE57083:0000000:300"t"GSM1374669"t"GSM1374369"
"GSE57083"t"GSE57083:0000000:301"t"GSM1374670"t"GSM1374369"
"GSE57083"t"GSE57083:0000000:302"t"GSM1374671"t"GSM1374369"
"GSE57083"t"GSE57083:0000000:303"t"GSM1374672"t"GSM1374369"
"GSE57083"t"GSE57083:0000000:304"t"GSM1374673"t"GSM1374369"
"GSE57083"t"GSE57083:0000000:305"t"GSM1374674"t"GSM1374369"
"GSE57083"t"GSE57083:0000000:306"t"GSM1374675"t"GSM1374369"
"GSE57083"t"GSE57083:0000000:307"t"GSM1374676"t"GSM1374369"
"GSE57083"t"GSE57083:0000000:308"t"GSM1374677"t"GSM1374369"
"GSE57083"t"GSE57083:0000000:309"t"GSM1374678"t"GSM1374369"
"GSE57083"t"GSE57083:0000000:310"t"GSM1374679"t"GSM1374369"
"GSE57083"t"GSE57083:0000000:311"t"GSM1374680"t"GSM1374369"
"GSE57083"t"GSE57083:0000000:312"t"GSM1374681"t"GSM1374369"
"GSE57083"t"GSE57083:0000000:313"t"GSM1374682"t"GSM1374369"
"GSE57083"t"GSE57083:0000000:314"t"GSM1374683"t"GSM1374369"
"GSE57083"t"GSE57083:0000000:315"t"GSM1374684"t"GSM1374369"
"GSE57083"t"GSE57083:0000000:316"t"GSM1374685"t"GSM1374369"
"GSE57083"t"GSE57083:0000000:317"t"GSM1374686"t"GSM1374369"
"GSE57083"t"GSE57083:0000000:318"t"GSM1374687"t"GSM1374369"
"GSE57083"t"GSE57083:0000000:319"t"GSM1374688"t"GSM1374369"
"GSE57083"t"GSE57083:0000000:320"t"GSM1374689"t"GSM1374369"
"GSE57083"t"GSE57083:0000000:321"t"GSM1374690"t"GSM1374369"
"GSE57083"t"GSE57083:0000000:322"t"GSM1374691"t"GSM1374369"
"GSE57083"t"GSE57083:0000000:323"t"GSM1374692"t"GSM1374369"
"GSE57083"t"GSE57083:0000000:324"t"GSM1374693"t"GSM1374369"
"GSE57083"t"GSE57083:0000000:325"t"GSM1374694"t"GSM1374369"
"GSE57083"t"GSE57083:0000000:326"t"GSM1374695"t"GSM1374369"
"GSE57083"t"GSE57083:0000000:327"t"GSM1374696"t"GSM1374369"
"GSE57083"t"GSE57083:0000000:328"t"GSM1374697"t"GSM1374369"
"GSE57083"t"GSE57083:0000000:329"t"GSM1374698"t"GSM1374369"
"GSE57083"t"GSE57083:0000000:330"t"GSM1374699"t"GSM1374369"
"GSE57083"t"GSE57083:0000000:331"t"GSM1374700"t"GSM1374369"
"GSE57083"t"GSE57083:0000000:332"t"GSM1374701"t"GSM1374369"
"GSE57083"t"GSE57083:0000000:333"t"GSM1374702"t"GSM1374369"
"GSE57083"t"GSE57083:0000000:334"t"GSM1374703"t"GSM1374369"
"GSE57083"t"GSE57083:0000000:335"t"GSM1374704"t"GSM1374369"
"GSE57083"t"GSE57083:0000000:336"t"GSM1374705"t"GSM1374369"
"GSE57083"t"GSE57083:0000000:337"t"GSM1374706"t"GSM1374369"
"GSE57083"t"GSE57083:0000000:338"t"GSM1374707"t"GSM1374369"
"GSE57083"t"GSE57083:0000000:339"t"GSM1374708"t"GSM1374369"
"GSE57083"t"GSE57083:0000000:340"t"GSM1374709"t"GSM1374369"
"GSE57083"t"GSE57083:0000000:341"t"GSM1374710"t"GSM1374369"
"GSE57083"t"GSE57083:0000000:342"t"GSM1374711"t"GSM1374369"
"GSE57083"t"GSE57083:0000000:343"t"GSM1374712"t"GSM1374369"
"GSE57083"t"GSE57083:0000000:344"t"GSM1374713"t"GSM1374369"
"GSE57083"t"GSE57083:0000000:345"t"GSM1374714"t"GSM1374369"
"GSE57083"t"GSE57083:0000000:346"t"GSM1374715"t"GSM1374369"
"GSE57083"t"GSE57083:0000000:347"t"GSM1374716"t"GSM1374369"
"GSE57083"t"GSE57083:0000000:348"t"GSM1374717"t"GSM1374369"
"GSE57083"t"GSE57083:0000000:349"t"GSM1374718"t"GSM1374369"
"GSE57083"t"GSE57083:0000000:350"t"GSM1374719"t"GSM1374369"
"GSE57083"t"GSE57083:0000000:351"t"GSM1374720"t"GSM1374369"
"GSE57083"t"GSE57083:0000000:352"t"GSM1374721"t"GSM1374369"
"GSE57083"t"GSE57083:0000000:353"t"GSM1374722"t"GSM1374369"
"GSE57083"t"GSE57083:0000000:354"t"GSM1374723"t"GSM1374369"
"GSE57083"t"GSE57083:0000000:355"t"GSM1374724"t"GSM1374369"
"GSE57083"t"GSE57083:0000000:356"t"GSM1374725"t"GSM1374369"
"GSE57083"t"GSE57083:0000000:357"t"GSM1374726"t"GSM1374369"
"GSE57083"t"GSE57083:0000000:358"t"GSM1374727"t"GSM1374369"
"GSE57083"t"GSE57083:0000000:359"t"GSM1374728"t"GSM1374369"
"GSE57083"t"GSE57083:0000000:360"t"GSM1374729"t"GSM1374369"
"GSE57083"t"GSE57083:0000000:361"t"GSM1374730"t"GSM1374369"
"GSE57083"t"GSE57083:0000000:362"t"GSM1374731"t"GSM1374369"
"GSE57083"t"GSE57083:0000000:363"t"GSM1374732"t"GSM1374369"
"GSE57083"t"GSE57083:0000000:364"t"GSM1374733"t"GSM1374369"
"GSE57083"t"GSE57083:0000000:365"t"GSM1374734"t"GSM1374369"
"GSE57083"t"GSE57083:0000000:366"t"GSM1374735"t"GSM1374369"
"GSE57083"t"GSE57083:0000000:367"t"GSM1374736"t"GSM1374369"
"GSE57083"t"GSE57083:0000000:368"t"GSM1374737"t"GSM1374369"
"GSE57083"t"GSE57083:0000000:369"t"GSM1374738"t"GSM1374369"
"GSE57083"t"GSE57083:0000000:370"t"GSM1374739"t"GSM1374369"
"GSE57083"t"GSE57083:0000000:371"t"GSM1374740"t"GSM1374369"
"GSE57083"t"GSE57083:0000000:372"t"GSM1374741"t"GSM1374369"
"GSE57083"t"GSE57083:0000000:373"t"GSM1374742"t"GSM1374369"
"GSE57083"t"GSE57083:0000000:374"t"GSM1374743"t"GSM1374369"
"GSE57083"t"GSE57083:0000000:375"t"GSM1374744"t"GSM1374369"
"GSE57083"t"GSE57083:0000000:376"t"GSM1374745"t"GSM1374369"
"GSE57083"t"GSE57083:0000000:377"t"GSM1374746"t"GSM1374369"
"GSE57083"t"GSE57083:0000000:378"t"GSM1374747"t"GSM1374369"
"GSE57083"t"GSE57083:0000000:379"t"GSM1374748"t"GSM1374369"
"GSE57083"t"GSE57083:0000000:380"t"GSM1374749"t"GSM1374369"
"GSE57083"t"GSE57083:0000000:381"t"GSM1374750"t"GSM1374369"
"GSE57083"t"GSE57083:0000000:382"t"GSM1374751"t"GSM1374369"
"GSE57083"t"GSE57083:0000000:383"t"GSM1374752"t"GSM1374369"
"GSE57083"t"GSE57083:0000000:384"t"GSM1374753"t"GSM1374369"
"GSE57083"t"GSE57083:0000000:385"t"GSM1374754"t"GSM1374369"
"GSE57083"t"GSE57083:0000000:386"t"GSM1374755"t"GSM1374369"
"GSE57083"t"GSE57083:0000000:387"t"GSM1374756"t"GSM1374369"
"GSE57083"t"GSE57083:0000000:388"t"GSM1374757"t"GSM1374369"
"GSE57083"t"GSE57083:0000000:389"t"GSM1374758"t"GSM1374369"
"GSE57083"t"GSE57083:0000000:390"t"GSM1374759"t"GSM1374369"
"GSE57083"t"GSE57083:0000000:391"t"GSM1374760"t"GSM1374369"
"GSE57083"t"GSE57083:0000000:392"t"GSM1374761"t"GSM1374369"
"GSE57083"t"GSE57083:0000000:393"t"GSM1374762"t"GSM1374369"
"GSE57083"t"GSE57083:0000000:394"t"GSM1374763"t"GSM1374369"
"GSE57083"t"GSE57083:0000000:395"t"GSM1374764"t"GSM1374369"
"GSE57083"t"GSE57083:0000000:396"t"GSM1374765"t"GSM1374369"
"GSE57083"t"GSE57083:0000000:397"t"GSM1374766"t"GSM1374369"
"GSE57083"t"GSE57083:0000000:398"t"GSM1374767"t"GSM1374369"
"GSE57083"t"GSE57083:0000000:399"t"GSM1374768"t"GSM1374369"
"GSE57083"t"GSE57083:0000000:400"t"GSM1374769"t"GSM1374369"
"GSE57083"t"GSE57083:0000000:401"t"GSM1374770"t"GSM1374369"
"GSE57083"t"GSE57083:0000000:402"t"GSM1374771"t"GSM1374369"
"GSE57083"t"GSE57083:0000000:403"t"GSM1374772"t"GSM1374369"
"GSE57083"t"GSE57083:0000000:404"t"GSM1374773"t"GSM1374369"
"GSE57083"t"GSE57083:0000000:405"t"GSM1374774"t"GSM1374369"
"GSE57083"t"GSE57083:0000000:406"t"GSM1374775"t"GSM1374369"
"GSE57083"t"GSE57083:0000000:407"t"GSM1374776"t"GSM1374369"
"GSE57083"t"GSE57083:0000000:408"t"GSM1374777"t"GSM1374369"
"GSE57083"t"GSE57083:0000000:409"t"GSM1374778"t"GSM1374369"
"GSE57083"t"GSE57083:0000000:410"t"GSM1374779"t"GSM1374369"
"GSE57083"t"GSE57083:0000000:411"t"GSM1374780"t"GSM1374369"
"GSE57083"t"GSE57083:0000000:412"t"GSM1374781"t"GSM1374369"
"GSE57083"t"GSE57083:0000000:413"t"GSM1374782"t"GSM1374369"
"GSE57083"t"GSE57083:0000000:414"t"GSM1374783"t"GSM1374369"
"GSE57083"t"GSE57083:0000000:415"t"GSM1374784"t"GSM1374369"
"GSE57083"t"GSE57083:0000000:416"t"GSM1374785"t"GSM1374369"
"GSE57083"t"GSE57083:0000000:417"t"GSM1374786"t"GSM1374369"
"GSE57083"t"GSE57083:0000000:418"t"GSM1374787"t"GSM1374369"
"GSE57083"t"GSE57083:0000000:419"t"GSM1374788"t"GSM1374369"
"GSE57083"t"GSE57083:0000000:420"t"GSM1374789"t"GSM1374369"
"GSE57083"t"GSE57083:0000000:421"t"GSM1374790"t"GSM1374369"
"GSE57083"t"GSE57083:0000000:422"t"GSM1374791"t"GSM1374369"
"GSE57083"t"GSE57083:0000000:423"t"GSM1374792"t"GSM1374369"
"GSE57083"t"GSE57083:0000000:424"t"GSM1374793"t"GSM1374369"
"GSE57083"t"GSE57083:0000000:425"t"GSM1374794"t"GSM1374369"
"GSE57083"t"GSE57083:0000000:426"t"GSM1374795"t"GSM1374369"
"GSE57083"t"GSE57083:0000000:427"t"GSM1374796"t"GSM1374369"
"GSE57083"t"GSE57083:0000000:428"t"GSM1374797"t"GSM1374369"
"GSE57083"t"GSE57083:0000000:429"t"GSM1374798"t"GSM1374369"
"GSE57083"t"GSE57083:0000000:430"t"GSM1374799"t"GSM1374369"
"GSE57083"t"GSE57083:0000000:431"t"GSM1374800"t"GSM1374369"
"GSE57083"t"GSE57083:0000000:432"t"GSM1374801"t"GSM1374369"
"GSE57083"t"GSE57083:0000000:433"t"GSM1374802"t"GSM1374369"
"GSE57083"t"GSE57083:0000000:434"t"GSM1374803"t"GSM1374369"
"GSE57083"t"GSE57083:0000000:435"t"GSM1374804"t"GSM1374369"
"GSE57083"t"GSE57083:0000000:436"t"GSM1374805"t"GSM1374369"
"GSE57083"t"GSE57083:0000000:437"t"GSM1374806"t"GSM1374369"
"GSE57083"t"GSE57083:0000000:438"t"GSM1374807"t"GSM1374369"
"GSE57083"t"GSE57083:0000000:439"t"GSM1374808"t"GSM1374369"
"GSE57083"t"GSE57083:0000000:440"t"GSM1374809"t"GSM1374369"
"GSE57083"t"GSE57083:0000000:441"t"GSM1374810"t"GSM1374369"
"GSE57083"t"GSE57083:0000000:442"t"GSM1374811"t"GSM1374369"
"GSE57083"t"GSE57083:0000000:443"t"GSM1374812"t"GSM1374369"
"GSE57083"t"GSE57083:0000000:444"t"GSM1374813"t"GSM1374369"
"GSE57083"t"GSE57083:0000000:445"t"GSM1374814"t"GSM1374369"
"GSE57083"t"GSE57083:0000000:446"t"GSM1374815"t"GSM1374369"
"GSE57083"t"GSE57083:0000000:447"t"GSM1374816"t"GSM1374369"
"GSE57083"t"GSE57083:0000000:448"t"GSM1374817"t"GSM1374369"
"GSE57083"t"GSE57083:0000000:449"t"GSM1374818"t"GSM1374369"
"GSE57083"t"GSE57083:0000000:450"t"GSM1374819"t"GSM1374369"
"GSE57083"t"GSE57083:0000000:451"t"GSM1374820"t"GSM1374369"
"GSE57083"t"GSE57083:0000000:452"t"GSM1374821"t"GSM1374369"
"GSE57083"t"GSE57083:0000000:453"t"GSM1374822"t"GSM1374369"
"GSE57083"t"GSE57083:0000000:454"t"GSM1374823"t"GSM1374369"
"GSE57083"t"GSE57083:0000000:455"t"GSM1374824"t"GSM1374369"
"GSE57083"t"GSE57083:0000000:456"t"GSM1374825"t"GSM1374369"
"GSE57083"t"GSE57083:0000000:457"t"GSM1374826"t"GSM1374369"
"GSE57083"t"GSE57083:0000000:458"t"GSM1374827"t"GSM1374369"
"GSE57083"t"GSE57083:0000000:459"t"GSM1374828"t"GSM1374369"
"GSE57083"t"GSE57083:0000000:460"t"GSM1374829"t"GSM1374369"
"GSE57083"t"GSE57083:0000000:461"t"GSM1374830"t"GSM1374369"
"GSE57083"t"GSE57083:0000000:462"t"GSM1374831"t"GSM1374369"
"GSE57083"t"GSE57083:0000000:463"t"GSM1374832"t"GSM1374369"
"GSE57083"t"GSE57083:0000000:464"t"GSM1374833"t"GSM1374369"
"GSE57083"t"GSE57083:0000000:465"t"GSM1374834"t"GSM1374369"
"GSE57083"t"GSE57083:0000000:466"t"GSM1374835"t"GSM1374369"
"GSE57083"t"GSE57083:0000000:467"t"GSM1374836"t"GSM1374369"
"GSE57083"t"GSE57083:0000000:468"t"GSM1374837"t"GSM1374369"
"GSE57083"t"GSE57083:0000000:469"t"GSM1374838"t"GSM1374369"
"GSE57083"t"GSE57083:0000000:470"t"GSM1374839"t"GSM1374369"
"GSE57083"t"GSE57083:0000000:471"t"GSM1374840"t"GSM1374369"
"GSE57083"t"GSE57083:0000000:472"t"GSM1374841"t"GSM1374369"
"GSE57083"t"GSE57083:0000000:473"t"GSM1374842"t"GSM1374369"
"GSE57083"t"GSE57083:0000000:474"t"GSM1374843"t"GSM1374369"
"GSE57083"t"GSE57083:0000000:475"t"GSM1374844"t"GSM1374369"
"GSE57083"t"GSE57083:0000000:476"t"GSM1374845"t"GSM1374369"
"GSE57083"t"GSE57083:0000000:477"t"GSM1374846"t"GSM1374369"
"GSE57083"t"GSE57083:0000000:478"t"GSM1374847"t"GSM1374369"
"GSE57083"t"GSE57083:0000000:479"t"GSM1374848"t"GSM1374369"
"GSE57083"t"GSE57083:0000000:480"t"GSM1374849"t"GSM1374369"
"GSE57083"t"GSE57083:0000000:481"t"GSM1374850"t"GSM1374369"
"GSE57083"t"GSE57083:0000000:482"t"GSM1374851"t"GSM1374369"
"GSE57083"t"GSE57083:0000000:483"t"GSM1374852"t"GSM1374369"
"GSE57083"t"GSE57083:0000000:484"t"GSM1374853"t"GSM1374369"
"GSE57083"t"GSE57083:0000000:485"t"GSM1374854"t"GSM1374369"
"GSE57083"t"GSE57083:0000000:486"t"GSM1374855"t"GSM1374369"
"GSE57083"t"GSE57083:0000000:487"t"GSM1374856"t"GSM1374369"
"GSE57083"t"GSE57083:0000000:488"t"GSM1374857"t"GSM1374369"
"GSE57083"t"GSE57083:0000000:489"t"GSM1374858"t"GSM1374369"
"GSE57083"t"GSE57083:0000000:490"t"GSM1374859"t"GSM1374369"
"GSE57083"t"GSE57083:0000000:491"t"GSM1374860"t"GSM1374369"
"GSE57083"t"GSE57083:0000000:492"t"GSM1374861"t"GSM1374369"
"GSE57083"t"GSE57083:0000000:493"t"GSM1374862"t"GSM1374369"
"GSE57083"t"GSE57083:0000000:494"t"GSM1374863"t"GSM1374369"
"GSE57083"t"GSE57083:0000000:495"t"GSM1374864"t"GSM1374369"
"GSE57083"t"GSE57083:0000000:496"t"GSM1374865"t"GSM1374369"
"GSE57083"t"GSE57083:0000000:497"t"GSM1374866"t"GSM1374369"
"GSE57083"t"GSE57083:0000000:498"t"GSM1374867"t"GSM1374369"
"GSE57083"t"GSE57083:0000000:499"t"GSM1374868"t"GSM1374369"
"GSE57083"t"GSE57083:0000000:500"t"GSM1374869"t"GSM1374369"
"GSE57083"t"GSE57083:0000000:501"t"GSM1374870"t"GSM1374369"
"GSE57083"t"GSE57083:0000000:502"t"GSM1374871"t"GSM1374369"
"GSE57083"t"GSE57083:0000000:503"t"GSM1374872"t"GSM1374369"
"GSE57083"t"GSE57083:0000000:504"t"GSM1374873"t"GSM1374369"
"GSE57083"t"GSE57083:0000000:505"t"GSM1374874"t"GSM1374369"
"GSE57083"t"GSE57083:0000000:506"t"GSM1374875"t"GSM1374369"
"GSE57083"t"GSE57083:0000000:507"t"GSM1374876"t"GSM1374369"
"GSE57083"t"GSE57083:0000000:508"t"GSM1374877"t"GSM1374369"
"GSE57083"t"GSE57083:0000000:509"t"GSM1374878"t"GSM1374369"
"GSE57083"t"GSE57083:0000000:510"t"GSM1374879"t"GSM1374369"
"GSE57083"t"GSE57083:0000000:511"t"GSM1374880"t"GSM1374369"
"GSE57083"t"GSE57083:0000000:512"t"GSM1374881"t"GSM1374369"
"GSE57083"t"GSE57083:0000000:513"t"GSM1374882"t"GSM1374369"
"GSE57083"t"GSE57083:0000000:514"t"GSM1374883"t"GSM1374369"
"GSE57083"t"GSE57083:0000000:515"t"GSM1374884"t"GSM1374369"
"GSE57083"t"GSE57083:0000000:516"t"GSM1374885"t"GSM1374369"
"GSE57083"t"GSE57083:0000000:517"t"GSM1374886"t"GSM1374369"
"GSE57083"t"GSE57083:0000000:518"t"GSM1374887"t"GSM1374369"
"GSE57083"t"GSE57083:0000000:519"t"GSM1374888"t"GSM1374369"
"GSE57083"t"GSE57083:0000000:520"t"GSM1374889"t"GSM1374369"
"GSE57083"t"GSE57083:0000000:521"t"GSM1374890"t"GSM1374369"
"GSE57083"t"GSE57083:0000000:522"t"GSM1374891"t"GSM1374369"
"GSE57083"t"GSE57083:0000000:523"t"GSM1374892"t"GSM1374369"
"GSE57083"t"GSE57083:0000000:524"t"GSM1374893"t"GSM1374369"
"GSE57083"t"GSE57083:0000000:525"t"GSM1374894"t"GSM1374369"
"GSE57083"t"GSE57083:0000000:526"t"GSM1374895"t"GSM1374369"
"GSE57083"t"GSE57083:0000000:527"t"GSM1374896"t"GSM1374369"
"GSE57083"t"GSE57083:0000000:528"t"GSM1374897"t"GSM1374369"
"GSE57083"t"GSE57083:0000000:529"t"GSM1374898"t"GSM1374369"
"GSE57083"t"GSE57083:0000000:530"t"GSM1374899"t"GSM1374369"
"GSE57083"t"GSE57083:0000000:531"t"GSM1374900"t"GSM1374369"
"GSE57083"t"GSE57083:0000000:532"t"GSM1374901"t"GSM1374369"
"GSE57083"t"GSE57083:0000000:533"t"GSM1374902"t"GSM1374369"
"GSE57083"t"GSE57083:0000000:534"t"GSM1374903"t"GSM1374369"
"GSE57083"t"GSE57083:0000000:535"t"GSM1374904"t"GSM1374369"
"GSE57083"t"GSE57083:0000000:536"t"GSM1374905"t"GSM1374369"
"GSE57083"t"GSE57083:0000000:537"t"GSM1374906"t"GSM1374369"
"GSE57083"t"GSE57083:0000000:538"t"GSM1374907"t"GSM1374369"
"GSE57083"t"GSE57083:0000000:539"t"GSM1374908"t"GSM1374369"
"GSE57083"t"GSE57083:0000000:540"t"GSM1374909"t"GSM1374369"
"GSE57083"t"GSE57083:0000000:541"t"GSM1374910"t"GSM1374369"
"GSE57083"t"GSE57083:0000000:542"t"GSM1374911"t"GSM1374369"
"GSE57083"t"GSE57083:0000000:543"t"GSM1374912"t"GSM1374369"
"GSE57083"t"GSE57083:0000000:544"t"GSM1374913"t"GSM1374369"
"GSE57083"t"GSE57083:0000000:545"t"GSM1374914"t"GSM1374369"
"GSE57083"t"GSE57083:0000000:546"t"GSM1374915"t"GSM1374369"
"GSE57083"t"GSE57083:0000000:547"t"GSM1374916"t"GSM1374369"
"GSE57083"t"GSE57083:0000000:548"t"GSM1374917"t"GSM1374369"
"GSE57083"t"GSE57083:0000000:549"t"GSM1374918"t"GSM1374369"
"GSE57083"t"GSE57083:0000000:550"t"GSM1374919"t"GSM1374369"
"GSE57083"t"GSE57083:0000000:551"t"GSM1374920"t"GSM1374369"
"GSE57083"t"GSE57083:0000000:552"t"GSM1374921"t"GSM1374369"
"GSE57083"t"GSE57083:0000000:553"t"GSM1374922"t"GSM1374369"
"GSE57083"t"GSE57083:0000000:554"t"GSM1374923"t"GSM1374369"
"GSE57083"t"GSE57083:0000000:555"t"GSM1374924"t"GSM1374369"
"GSE57083"t"GSE57083:0000000:556"t"GSM1374925"t"GSM1374369"
"GSE57083"t"GSE57083:0000000:557"t"GSM1374926"t"GSM1374369"
"GSE57083"t"GSE57083:0000000:558"t"GSM1374927"t"GSM1374369"
"GSE57083"t"GSE57083:0000000:559"t"GSM1374928"t"GSM1374369"
"GSE57083"t"GSE57083:0000000:560"t"GSM1374929"t"GSM1374369"
"GSE57083"t"GSE57083:0000000:561"t"GSM1374930"t"GSM1374369"
"GSE57083"t"GSE57083:0000000:562"t"GSM1374931"t"GSM1374369"
"GSE57083"t"GSE57083:0000000:563"t"GSM1374932"t"GSM1374369"
"GSE57083"t"GSE57083:0000000:564"t"GSM1374933"t"GSM1374369"
"GSE57083"t"GSE57083:0000000:565"t"GSM1374934"t"GSM1374369"
"GSE57083"t"GSE57083:0000000:566"t"GSM1374935"t"GSM1374369"
"GSE57083"t"GSE57083:0000000:567"t"GSM1374936"t"GSM1374369"
"GSE57083"t"GSE57083:0000000:568"t"GSM1374937"t"GSM1374369"
"GSE57083"t"GSE57083:0000000:569"t"GSM1374938"t"GSM1374369"
"GSE57083"t"GSE57083:0000000:570"t"GSM1374939"t"GSM1374369"
"GSE57083"t"GSE57083:0000000:571"t"GSM1374940"t"GSM1374369"
"GSE57083"t"GSE57083:0000000:572"t"GSM1374941"t"GSM1374369"
"GSE57083"t"GSE57083:0000000:573"t"GSM1374942"t"GSM1374369"
"GSE57083"t"GSE57083:0000000:574"t"GSM1374943"t"GSM1374369"
"GSE57083"t"GSE57083:0000000:575"t"GSM1374944"t"GSM1374369"
"GSE57083"t"GSE57083:0000000:576"t"GSM1374945"t"GSM1374369"
"GSE57083"t"GSE57083:0000000:577"t"GSM1374946"t"GSM1374369"
"GSE57083"t"GSE57083:0000000:578"t"GSM1374947"t"GSM1374369"
"GSE57083"t"GSE57083:0000000:579"t"GSM1374948"t"GSM1374369"
"GSE57083"t"GSE57083:0000000:580"t"GSM1374949"t"GSM1374369"
"GSE57083"t"GSE57083:0000000:581"t"GSM1374950"t"GSM1374369"
"GSE57083"t"GSE57083:0000000:582"t"GSM1374951"t"GSM1374369"
"GSE57083"t"GSE57083:0000000:583"t"GSM1374952"t"GSM1374369"
"GSE57083"t"GSE57083:0000000:584"t"GSM1374953"t"GSM1374369"
"GSE57083"t"GSE57083:0000000:585"t"GSM1374954"t"GSM1374369"
"GSE57083"t"GSE57083:0000000:586"t"GSM1374955"t"GSM1374369"
"GSE57083"t"GSE57083:0000000:587"t"GSM1374956"t"GSM1374369"
"GSE57083"t"GSE57083:0000000:588"t"GSM1374957"t"GSM1374369"
"GSE57083"t"GSE57083:0000000:589"t"GSM1374958"t"GSM1374369"
"GSE57083"t"GSE57083:0000000:590"t"GSM1374959"t"GSM1374369"
"GSE57083"t"GSE57083:0000000:591"t"GSM1374960"t"GSM1374369"
"GSE57083"t"GSE57083:0000000:592"t"GSM1374961"t"GSM1374369"
"GSE57083"t"GSE57083:0000000:593"t"GSM1374962"t"GSM1374369"
"GSE57083"t"GSE57083:0000000:594"t"GSM1374963"t"GSM1374369"
"GSE57083"t"GSE57083:0000000:595"t"GSM1374964"t"GSM1374369"
"GSE57083"t"GSE57083:0000000:596"t"GSM1374965"t"GSM1374369"
"GSE57083"t"GSE57083:0000000:597"t"GSM1374966"t"GSM1374369"
"GSE57083"t"GSE57083:0000000:598"t"GSM1374967"t"GSM1374369"
"GSE57083"t"GSE57083:0000000:599"t"GSM1374968"t"GSM1374369"
"GSE57083"t"GSE57083:0000000:600"t"GSM1374969"t"GSM1374369"
"GSE57083"t"GSE57083:0000000:601"t"GSM1374970"t"GSM1374369"
"GSE57083"t"GSE57083:0000000:602"t"GSM1374971"t"GSM1374369"
"GSE57083"t"GSE57083:0000000:603"t"GSM1374972"t"GSM1374369"
"GSE57083"t"GSE57083:0000000:604"t"GSM1374973"t"GSM1374369"
"GSE57083"t"GSE57083:0000000:605"t"GSM1374974"t"GSM1374369"
"GSE57083"t"GSE57083:0000000:606"t"GSM1374975"t"GSM1374369"
"GSE57083"t"GSE57083:0000000:607"t"GSM1374976"t"GSM1374369"
"GSE57083"t"GSE57083:0000000:608"t"GSM1374977"t"GSM1374369"
"GSE57083"t"GSE57083:0000000:609"t"GSM1374978"t"GSM1374369"
"GSE57083"t"GSE57083:0000000:610"t"GSM1374979"t"GSM1374369"
"GSE57083"t"GSE57083:0000000:611"t"GSM1374980"t"GSM1374369"
"GSE57083"t"GSE57083:0000000:612"t"GSM1374981"t"GSM1374369"
"GSE57083"t"GSE57083:0000000:613"t"GSM1374982"t"GSM1374369"
"GSE57083"t"GSE57083:0000000:614"t"GSM1374983"t"GSM1374369"
"GSE57083"t"GSE57083:0000000:615"t"GSM1374984"t"GSM1374369"
"GSE57083"t"GSE57083:0000000:616"t"GSM1374985"t"GSM1374369"
"GSE57083"t"GSE57083:0000000:617"t"GSM1374986"t"GSM1374369"
"GSE57083"t"GSE57083:0000000:618"t"GSM1374987"t"GSM1374369"
"GSE57083"t"GSE57083:0000000:619"t"GSM1374988"t"GSM1374369"
"GSE57083"t"GSE57083:0000000:620"t"GSM1374989"t"GSM1374369"
"GSE57083"t"GSE57083:0000000:621"t"GSM1374990"t"GSM1374369"
"GSE57083"t"GSE57083:0000000:622"t"GSM1374991"t"GSM1374369"
"GSE57083"t"GSE57083:0000000:623"t"GSM1374992"t"GSM1374369"
"GSE57083"t"GSE57083:0000000:624"t"GSM1374993"t"GSM1374369"
"GSE57083"t"GSE57083:0000000:625"t"GSM1374994"t"GSM1374369"
"GSE57083"t"GSE57083:0000000:626"t"GSM1374995"t"GSM1374369"
"GSE57156"t"GSE57156:0:1"t"GSM1376338;GSM1376339;GSM1376342;GSM1376343;GSM1376346;GSM1376347;GSM1376350;GSM1376351"t"GSM1376336;GSM1376337;GSM1376340;GSM1376341;GSM1376344;GSM1376345;GSM1376348;GSM1376349"
"GSE57156"t"GSE57156:1:1"t"GSM1376322;GSM1376323;GSM1376326;GSM1376327;GSM1376330;GSM1376331;GSM1376334;GSM1376335"t"GSM1376320;GSM1376321;GSM1376324;GSM1376325;GSM1376328;GSM1376329;GSM1376332;GSM1376333"
"GSE57194"t"GSE57194:0:1"t"GSM1376949;GSM1376950"t"GSM1376943;GSM1376944"
"GSE57194"t"GSE57194:0:2"t"GSM1376955;GSM1376956"t"GSM1376943;GSM1376944"
"GSE57194"t"GSE57194:0:3"t"GSM1376961;GSM1376962"t"GSM1376943;GSM1376944"
"GSE57194"t"GSE57194:0:4"t"GSM1376967;GSM1376968"t"GSM1376943;GSM1376944"
"GSE57194"t"GSE57194:1:1"t"GSM1376951;GSM1376952"t"GSM1376945;GSM1376946"
"GSE57194"t"GSE57194:1:2"t"GSM1376957;GSM1376958"t"GSM1376945;GSM1376946"
"GSE57194"t"GSE57194:1:3"t"GSM1376963;GSM1376964"t"GSM1376945;GSM1376946"
"GSE57194"t"GSE57194:1:4"t"GSM1376969;GSM1376970"t"GSM1376945;GSM1376946"
"GSE57194"t"GSE57194:2:1"t"GSM1376953;GSM1376954"t"GSM1376947;GSM1376948"
"GSE57194"t"GSE57194:2:2"t"GSM1376959;GSM1376960"t"GSM1376947;GSM1376948"
"GSE57194"t"GSE57194:2:3"t"GSM1376965;GSM1376966"t"GSM1376947;GSM1376948"
"GSE57194"t"GSE57194:2:4"t"GSM1376971;GSM1376972"t"GSM1376947;GSM1376948"
"GSE57255"t"GSE57255:0:1"t"GSM1377986;GSM1377987"t"GSM1377984;GSM1377985"
"GSE57255"t"GSE57255:0:2"t"GSM1377988;GSM1377989"t"GSM1377984;GSM1377985"
"GSE57255"t"GSE57255:0:3"t"GSM1377990;GSM1377991"t"GSM1377984;GSM1377985"
"GSE57255"t"GSE57255:0:4"t"GSM1377992;GSM1377993"t"GSM1377984;GSM1377985"
"GSE57255"t"GSE57255:0:5"t"GSM1377994;GSM1377995"t"GSM1377984;GSM1377985"
"GSE57255"t"GSE57255:1:1"t"GSM1377998;GSM1377999"t"GSM1377996;GSM1377997"
"GSE57255"t"GSE57255:1:2"t"GSM1378000;GSM1378001"t"GSM1377996;GSM1377997"
"GSE57255"t"GSE57255:1:3"t"GSM1378002;GSM1378003"t"GSM1377996;GSM1377997"
"GSE57255"t"GSE57255:1:4"t"GSM1378004;GSM1378005"t"GSM1377996;GSM1377997"
"GSE57255"t"GSE57255:1:5"t"GSM1378006;GSM1378007"t"GSM1377996;GSM1377997"
"GSE57303"t"GSE57303:0000000:01"t"GSM1379262"t"GSM1379261"
"GSE57303"t"GSE57303:0000000:02"t"GSM1379263"t"GSM1379261"
"GSE57303"t"GSE57303:0000000:03"t"GSM1379264"t"GSM1379261"
"GSE57303"t"GSE57303:0000000:04"t"GSM1379265"t"GSM1379261"
"GSE57303"t"GSE57303:0000000:05"t"GSM1379266"t"GSM1379261"
"GSE57303"t"GSE57303:0000000:06"t"GSM1379267"t"GSM1379261"
"GSE57303"t"GSE57303:0000000:07"t"GSM1379268"t"GSM1379261"
"GSE57303"t"GSE57303:0000000:08"t"GSM1379269"t"GSM1379261"
"GSE57303"t"GSE57303:0000000:09"t"GSM1379270"t"GSM1379261"
"GSE57303"t"GSE57303:0000000:10"t"GSM1379271"t"GSM1379261"
"GSE57303"t"GSE57303:0000000:11"t"GSM1379272"t"GSM1379261"
"GSE57303"t"GSE57303:0000000:12"t"GSM1379273"t"GSM1379261"
"GSE57303"t"GSE57303:0000000:13"t"GSM1379274"t"GSM1379261"
"GSE57303"t"GSE57303:0000000:14"t"GSM1379275"t"GSM1379261"
"GSE57303"t"GSE57303:0000000:15"t"GSM1379276"t"GSM1379261"
"GSE57303"t"GSE57303:0000000:16"t"GSM1379277"t"GSM1379261"
"GSE57303"t"GSE57303:0000000:17"t"GSM1379278"t"GSM1379261"
"GSE57303"t"GSE57303:0000000:18"t"GSM1379279"t"GSM1379261"
"GSE57303"t"GSE57303:0000000:19"t"GSM1379280"t"GSM1379261"
"GSE57303"t"GSE57303:0000000:20"t"GSM1379281"t"GSM1379261"
"GSE57303"t"GSE57303:0000000:21"t"GSM1379282"t"GSM1379261"
"GSE57303"t"GSE57303:0000000:22"t"GSM1379283"t"GSM1379261"
"GSE57303"t"GSE57303:0000000:23"t"GSM1379284"t"GSM1379261"
"GSE57303"t"GSE57303:0000000:24"t"GSM1379285"t"GSM1379261"
"GSE57303"t"GSE57303:0000000:25"t"GSM1379286"t"GSM1379261"
"GSE57303"t"GSE57303:0000000:26"t"GSM1379287"t"GSM1379261"
"GSE57303"t"GSE57303:0000000:27"t"GSM1379288"t"GSM1379261"
"GSE57303"t"GSE57303:0000000:28"t"GSM1379289"t"GSM1379261"
"GSE57303"t"GSE57303:0000000:29"t"GSM1379290"t"GSM1379261"
"GSE57303"t"GSE57303:0000000:30"t"GSM1379291"t"GSM1379261"
"GSE57303"t"GSE57303:0000000:31"t"GSM1379292"t"GSM1379261"
"GSE57303"t"GSE57303:0000000:32"t"GSM1379293"t"GSM1379261"
"GSE57303"t"GSE57303:0000000:33"t"GSM1379294"t"GSM1379261"
"GSE57303"t"GSE57303:0000000:34"t"GSM1379295"t"GSM1379261"
"GSE57303"t"GSE57303:0000000:35"t"GSM1379296"t"GSM1379261"
"GSE57303"t"GSE57303:0000000:36"t"GSM1379297"t"GSM1379261"
"GSE57303"t"GSE57303:0000000:37"t"GSM1379298"t"GSM1379261"
"GSE57303"t"GSE57303:0000000:38"t"GSM1379299"t"GSM1379261"
"GSE57303"t"GSE57303:0000000:39"t"GSM1379300"t"GSM1379261"
"GSE57303"t"GSE57303:0000000:40"t"GSM1379301"t"GSM1379261"
"GSE57303"t"GSE57303:0000000:41"t"GSM1379302"t"GSM1379261"
"GSE57303"t"GSE57303:0000000:42"t"GSM1379303"t"GSM1379261"
"GSE57303"t"GSE57303:0000000:43"t"GSM1379304"t"GSM1379261"
"GSE57303"t"GSE57303:0000000:44"t"GSM1379305"t"GSM1379261"
"GSE57303"t"GSE57303:0000000:45"t"GSM1379306"t"GSM1379261"
"GSE57303"t"GSE57303:0000000:46"t"GSM1379307"t"GSM1379261"
"GSE57303"t"GSE57303:0000000:47"t"GSM1379308"t"GSM1379261"
"GSE57303"t"GSE57303:0000000:48"t"GSM1379309"t"GSM1379261"
"GSE57303"t"GSE57303:0000000:49"t"GSM1379310"t"GSM1379261"
"GSE57303"t"GSE57303:0000000:50"t"GSM1379311"t"GSM1379261"
"GSE57303"t"GSE57303:0000000:51"t"GSM1379312"t"GSM1379261"
"GSE57303"t"GSE57303:0000000:52"t"GSM1379313"t"GSM1379261"
"GSE57303"t"GSE57303:0000000:53"t"GSM1379314"t"GSM1379261"
"GSE57303"t"GSE57303:0000000:54"t"GSM1379315"t"GSM1379261"
"GSE57303"t"GSE57303:0000000:55"t"GSM1379316"t"GSM1379261"
"GSE57303"t"GSE57303:0000000:56"t"GSM1379317"t"GSM1379261"
"GSE57303"t"GSE57303:0000000:57"t"GSM1379318"t"GSM1379261"
"GSE57303"t"GSE57303:0000000:58"t"GSM1379319"t"GSM1379261"
"GSE57303"t"GSE57303:0000000:59"t"GSM1379320"t"GSM1379261"
"GSE57303"t"GSE57303:0000000:60"t"GSM1379321"t"GSM1379261"
"GSE57303"t"GSE57303:0000000:61"t"GSM1379322"t"GSM1379261"
"GSE57303"t"GSE57303:0000000:62"t"GSM1379323"t"GSM1379261"
"GSE57303"t"GSE57303:0000000:63"t"GSM1379324"t"GSM1379261"
"GSE57303"t"GSE57303:0000000:64"t"GSM1379325"t"GSM1379261"
"GSE57303"t"GSE57303:0000000:65"t"GSM1379326"t"GSM1379261"
"GSE57303"t"GSE57303:0000000:66"t"GSM1379327"t"GSM1379261"
"GSE57303"t"GSE57303:0000000:67"t"GSM1379328"t"GSM1379261"
"GSE57303"t"GSE57303:0000000:68"t"GSM1379329"t"GSM1379261"
"GSE57303"t"GSE57303:0000000:69"t"GSM1379330"t"GSM1379261"
"GSE57317"t"GSE57317:0000000:01"t"GSM1379433"t"GSM1379432"
"GSE57317"t"GSE57317:0000000:02"t"GSM1379434"t"GSM1379432"
"GSE57317"t"GSE57317:0000000:03"t"GSM1379435"t"GSM1379432"
"GSE57317"t"GSE57317:0000000:04"t"GSM1379436"t"GSM1379432"
"GSE57317"t"GSE57317:0000000:05"t"GSM1379437"t"GSM1379432"
"GSE57317"t"GSE57317:0000000:06"t"GSM1379438"t"GSM1379432"
"GSE57317"t"GSE57317:0000000:07"t"GSM1379439"t"GSM1379432"
"GSE57317"t"GSE57317:0000000:08"t"GSM1379440"t"GSM1379432"
"GSE57317"t"GSE57317:0000000:09"t"GSM1379441"t"GSM1379432"
"GSE57317"t"GSE57317:0000000:10"t"GSM1379442"t"GSM1379432"
"GSE57317"t"GSE57317:0000000:11"t"GSM1379443"t"GSM1379432"
"GSE57317"t"GSE57317:0000000:12"t"GSM1379444"t"GSM1379432"
"GSE57317"t"GSE57317:0000000:13"t"GSM1379445"t"GSM1379432"
"GSE57317"t"GSE57317:0000000:14"t"GSM1379446"t"GSM1379432"
"GSE57317"t"GSE57317:0000000:15"t"GSM1379447"t"GSM1379432"
"GSE57317"t"GSE57317:0000000:16"t"GSM1379448"t"GSM1379432"
"GSE57317"t"GSE57317:0000000:17"t"GSM1379449"t"GSM1379432"
"GSE57317"t"GSE57317:0000000:18"t"GSM1379450"t"GSM1379432"
"GSE57317"t"GSE57317:0000000:19"t"GSM1379451"t"GSM1379432"
"GSE57317"t"GSE57317:0000000:20"t"GSM1379452"t"GSM1379432"
"GSE57317"t"GSE57317:0000000:21"t"GSM1379453"t"GSM1379432"
"GSE57317"t"GSE57317:0000000:22"t"GSM1379454"t"GSM1379432"
"GSE57317"t"GSE57317:0000000:23"t"GSM1379455"t"GSM1379432"
"GSE57317"t"GSE57317:0000000:24"t"GSM1379456"t"GSM1379432"
"GSE57317"t"GSE57317:0000000:25"t"GSM1379457"t"GSM1379432"
"GSE57317"t"GSE57317:0000000:26"t"GSM1379458"t"GSM1379432"
"GSE57317"t"GSE57317:0000000:27"t"GSM1379459"t"GSM1379432"
"GSE57317"t"GSE57317:0000000:28"t"GSM1379460"t"GSM1379432"
"GSE57317"t"GSE57317:0000000:29"t"GSM1379461"t"GSM1379432"
"GSE57317"t"GSE57317:0000000:30"t"GSM1379462"t"GSM1379432"
"GSE57317"t"GSE57317:0000000:31"t"GSM1379463"t"GSM1379432"
"GSE57317"t"GSE57317:0000000:32"t"GSM1379464"t"GSM1379432"
"GSE57317"t"GSE57317:0000000:33"t"GSM1379465"t"GSM1379432"
"GSE57317"t"GSE57317:0000000:34"t"GSM1379466"t"GSM1379432"
"GSE57317"t"GSE57317:0000000:35"t"GSM1379467"t"GSM1379432"
"GSE57317"t"GSE57317:0000000:36"t"GSM1379468"t"GSM1379432"
"GSE57317"t"GSE57317:0000000:37"t"GSM1379469"t"GSM1379432"
"GSE57317"t"GSE57317:0000000:38"t"GSM1379470"t"GSM1379432"
"GSE57317"t"GSE57317:0000000:39"t"GSM1379471"t"GSM1379432"
"GSE57317"t"GSE57317:0000000:40"t"GSM1379472"t"GSM1379432"
"GSE57317"t"GSE57317:0000000:41"t"GSM1379473"t"GSM1379432"
"GSE57317"t"GSE57317:0000000:42"t"GSM1379474"t"GSM1379432"
"GSE57317"t"GSE57317:0000000:43"t"GSM1379475"t"GSM1379432"
"GSE57317"t"GSE57317:0000000:44"t"GSM1379476"t"GSM1379432"
"GSE57317"t"GSE57317:0000000:45"t"GSM1379477"t"GSM1379432"
"GSE57317"t"GSE57317:0000000:46"t"GSM1379478"t"GSM1379432"
"GSE57317"t"GSE57317:0000000:47"t"GSM1379479"t"GSM1379432"
"GSE57317"t"GSE57317:0000000:48"t"GSM1379480"t"GSM1379432"
"GSE57317"t"GSE57317:0000000:49"t"GSM1379481"t"GSM1379432"
"GSE57317"t"GSE57317:0000000:50"t"GSM1379482"t"GSM1379432"
"GSE57317"t"GSE57317:0000000:51"t"GSM1379483"t"GSM1379432"
"GSE57317"t"GSE57317:0000000:52"t"GSM1379484"t"GSM1379432"
"GSE57317"t"GSE57317:0000000:53"t"GSM1379485"t"GSM1379432"
"GSE57317"t"GSE57317:0000000:54"t"GSM1379486"t"GSM1379432"
"GSE57348"t"GSE57348:1:1"t"GSM1380759;GSM1380760;GSM1380761"t"GSM1380756;GSM1380757;GSM1380758"
"GSE57348"t"GSE57348:1:2"t"GSM1380762;GSM1380763;GSM1380764"t"GSM1380756;GSM1380757;GSM1380758"
"GSE57348"t"GSE57348:1:3"t"GSM1380765;GSM1380766;GSM1380767"t"GSM1380756;GSM1380757;GSM1380758"
"GSE57348"t"GSE57348:2:2"t"GSM1380771;GSM1380772;GSM1380773"t"GSM1380768;GSM1380769;GSM1380770"
"GSE57429"t"GSE57429:0000000:1"t"GSM1382430"t"GSM1382432"
"GSE57429"t"GSE57429:0000000:2"t"GSM1382431"t"GSM1382432"
"GSE57441"t"GSE57441:0000000:1"t"GSM1382534;GSM1382535;GSM1382536"t"GSM1382531;GSM1382532;GSM1382533"
"GSE57463"t"GSE57463:0000000:1"t"GSM1383153;GSM1383154;GSM1383155"t"GSM1383150;GSM1383151;GSM1383152"
"GSE57520"t"GSE57520:0000000:1"t"GSM1384129;GSM1384130;GSM1384131;GSM1384132"t"GSM1384133;GSM1384134;GSM1384135"
"GSE57547"t"GSE57547:1:2"t"GSM1384566;GSM1384567"t"GSM1384550;GSM1384551"
"GSE57547"t"GSE57547:2:2"t"GSM1384568;GSM1384569"t"GSM1384552;GSM1384553"
"GSE57547"t"GSE57547:3:2"t"GSM1384570;GSM1384571"t"GSM1384554;GSM1384555"
"GSE57547"t"GSE57547:4:2"t"GSM1384572;GSM1384573"t"GSM1384556;GSM1384557"
"GSE57547"t"GSE57547:5:2"t"GSM1384574;GSM1384575"t"GSM1384558;GSM1384559"
"GSE57547"t"GSE57547:6:2"t"GSM1384576;GSM1384577"t"GSM1384560;GSM1384561"
"GSE57547"t"GSE57547:7:2"t"GSM1384578;GSM1384579"t"GSM1384562;GSM1384563"
"GSE57547"t"GSE57547:8:2"t"GSM1384580;GSM1384581"t"GSM1384564;GSM1384565"
"GSE57552"t"GSE57552:1:1"t"GSM1384620;GSM1384621"t"GSM1384622"
"GSE57552"t"GSE57552:2:1"t"GSM1384623;GSM1384624"t"GSM1384625"
"GSE57634"t"GSE57634:0:1"t"GSM1385762;GSM1385763"t"GSM1385756;GSM1385757"
"GSE57634"t"GSE57634:0:2"t"GSM1385768;GSM1385769"t"GSM1385756;GSM1385757"
"GSE57634"t"GSE57634:1:1"t"GSM1385764;GSM1385765"t"GSM1385758;GSM1385759"
"GSE57634"t"GSE57634:1:2"t"GSM1385770;GSM1385771"t"GSM1385758;GSM1385759"
"GSE57634"t"GSE57634:2:1"t"GSM1385766;GSM1385767"t"GSM1385760;GSM1385761"
"GSE57634"t"GSE57634:2:2"t"GSM1385772;GSM1385773"t"GSM1385760;GSM1385761"
"GSE57660"t"GSE57660:0000000:1"t"GSM1386221"t"GSM1386223"
"GSE57660"t"GSE57660:0000000:2"t"GSM1386222"t"GSM1386223"
"GSE57728"t"GSE57728:0:1"t"GSM1387688;GSM1387689;GSM1387690"t"GSM1387694;GSM1387695;GSM1387696"
"GSE57728"t"GSE57728:1:1"t"GSM1387691;GSM1387692;GSM1387693"t"GSM1387697;GSM1387698;GSM1387699"
"GSE57864"t"GSE57864:1:1"t"GSM1395249;GSM1395250;GSM1395251"t"GSM1395247;GSM1395248"
"GSE57864"t"GSE57864:2:1"t"GSM1395255;GSM1395256;GSM1395257"t"GSM1395252;GSM1395253;GSM1395254"
"GSE58004"t"GSE58004:1:1"t"GSM1399394;GSM1399395"t"GSM1399392;GSM1399393"
"GSE58004"t"GSE58004:2:1"t"GSM1399398;GSM1399399"t"GSM1399396;GSM1399397"
"GSE58024"t"GSE58024:0000000:1"t"GSM1399551;GSM1399552"t"GSM1399549;GSM1399550"
"GSE58033"t"GSE58033:1:1"t"GSM1399649"t"GSM1399648"
"GSE58033"t"GSE58033:2:1"t"GSM1399651"t"GSM1399650"
"GSE58049"t"GSE58049:0000000:1"t"GSM1400089;GSM1400093;GSM1400094"t"GSM1400088;GSM1400092;GSM1400096"
"GSE58049"t"GSE58049:0000000:2"t"GSM1400090;GSM1400091;GSM1400095"t"GSM1400088;GSM1400092;GSM1400096"
"GSE58133"t"GSE58133:0000000:001"t"GSM1401514"t"GSM1401513"
"GSE58133"t"GSE58133:0000000:002"t"GSM1401515"t"GSM1401513"
"GSE58133"t"GSE58133:0000000:003"t"GSM1401516"t"GSM1401513"
"GSE58133"t"GSE58133:0000000:004"t"GSM1401517"t"GSM1401513"
"GSE58133"t"GSE58133:0000000:005"t"GSM1401518"t"GSM1401513"
"GSE58133"t"GSE58133:0000000:006"t"GSM1401519"t"GSM1401513"
"GSE58133"t"GSE58133:0000000:007"t"GSM1401520"t"GSM1401513"
"GSE58133"t"GSE58133:0000000:008"t"GSM1401521"t"GSM1401513"
"GSE58133"t"GSE58133:0000000:009"t"GSM1401522"t"GSM1401513"
"GSE58133"t"GSE58133:0000000:010"t"GSM1401523"t"GSM1401513"
"GSE58133"t"GSE58133:0000000:011"t"GSM1401524"t"GSM1401513"
"GSE58133"t"GSE58133:0000000:012"t"GSM1401525"t"GSM1401513"
"GSE58133"t"GSE58133:0000000:013"t"GSM1401526"t"GSM1401513"
"GSE58133"t"GSE58133:0000000:014"t"GSM1401527"t"GSM1401513"
"GSE58133"t"GSE58133:0000000:015"t"GSM1401528"t"GSM1401513"
"GSE58133"t"GSE58133:0000000:016"t"GSM1401529"t"GSM1401513"
"GSE58133"t"GSE58133:0000000:017"t"GSM1401530"t"GSM1401513"
"GSE58133"t"GSE58133:0000000:018"t"GSM1401531"t"GSM1401513"
"GSE58133"t"GSE58133:0000000:019"t"GSM1401532"t"GSM1401513"
"GSE58133"t"GSE58133:0000000:020"t"GSM1401533"t"GSM1401513"
"GSE58133"t"GSE58133:0000000:021"t"GSM1401534"t"GSM1401513"
"GSE58133"t"GSE58133:0000000:022"t"GSM1401535"t"GSM1401513"
"GSE58133"t"GSE58133:0000000:023"t"GSM1401536"t"GSM1401513"
"GSE58133"t"GSE58133:0000000:024"t"GSM1401537"t"GSM1401513"
"GSE58133"t"GSE58133:0000000:025"t"GSM1401538"t"GSM1401513"
"GSE58133"t"GSE58133:0000000:026"t"GSM1401539"t"GSM1401513"
"GSE58133"t"GSE58133:0000000:027"t"GSM1401540"t"GSM1401513"
"GSE58133"t"GSE58133:0000000:028"t"GSM1401541"t"GSM1401513"
"GSE58133"t"GSE58133:0000000:029"t"GSM1401542"t"GSM1401513"
"GSE58133"t"GSE58133:0000000:030"t"GSM1401543"t"GSM1401513"
"GSE58133"t"GSE58133:0000000:031"t"GSM1401544"t"GSM1401513"
"GSE58133"t"GSE58133:0000000:032"t"GSM1401545"t"GSM1401513"
"GSE58133"t"GSE58133:0000000:033"t"GSM1401546"t"GSM1401513"
"GSE58133"t"GSE58133:0000000:034"t"GSM1401547"t"GSM1401513"
"GSE58133"t"GSE58133:0000000:035"t"GSM1401548"t"GSM1401513"
"GSE58133"t"GSE58133:0000000:036"t"GSM1401549"t"GSM1401513"
"GSE58133"t"GSE58133:0000000:037"t"GSM1401550"t"GSM1401513"
"GSE58133"t"GSE58133:0000000:038"t"GSM1401551"t"GSM1401513"
"GSE58133"t"GSE58133:0000000:039"t"GSM1401552"t"GSM1401513"
"GSE58133"t"GSE58133:0000000:040"t"GSM1401553"t"GSM1401513"
"GSE58133"t"GSE58133:0000000:041"t"GSM1401554"t"GSM1401513"
"GSE58133"t"GSE58133:0000000:042"t"GSM1401555"t"GSM1401513"
"GSE58133"t"GSE58133:0000000:043"t"GSM1401556"t"GSM1401513"
"GSE58133"t"GSE58133:0000000:044"t"GSM1401557"t"GSM1401513"
"GSE58133"t"GSE58133:0000000:045"t"GSM1401558"t"GSM1401513"
"GSE58133"t"GSE58133:0000000:046"t"GSM1401559"t"GSM1401513"
"GSE58133"t"GSE58133:0000000:047"t"GSM1401560"t"GSM1401513"
"GSE58133"t"GSE58133:0000000:048"t"GSM1401561"t"GSM1401513"
"GSE58133"t"GSE58133:0000000:049"t"GSM1401562"t"GSM1401513"
"GSE58133"t"GSE58133:0000000:050"t"GSM1401563"t"GSM1401513"
"GSE58133"t"GSE58133:0000000:051"t"GSM1401564"t"GSM1401513"
"GSE58133"t"GSE58133:0000000:052"t"GSM1401565"t"GSM1401513"
"GSE58133"t"GSE58133:0000000:053"t"GSM1401566"t"GSM1401513"
"GSE58133"t"GSE58133:0000000:054"t"GSM1401567"t"GSM1401513"
"GSE58133"t"GSE58133:0000000:055"t"GSM1401568"t"GSM1401513"
"GSE58133"t"GSE58133:0000000:056"t"GSM1401569"t"GSM1401513"
"GSE58133"t"GSE58133:0000000:057"t"GSM1401570"t"GSM1401513"
"GSE58133"t"GSE58133:0000000:058"t"GSM1401571"t"GSM1401513"
"GSE58133"t"GSE58133:0000000:059"t"GSM1401572"t"GSM1401513"
"GSE58133"t"GSE58133:0000000:060"t"GSM1401573"t"GSM1401513"
"GSE58133"t"GSE58133:0000000:061"t"GSM1401574"t"GSM1401513"
"GSE58133"t"GSE58133:0000000:062"t"GSM1401575"t"GSM1401513"
"GSE58133"t"GSE58133:0000000:063"t"GSM1401576"t"GSM1401513"
"GSE58133"t"GSE58133:0000000:064"t"GSM1401577"t"GSM1401513"
"GSE58133"t"GSE58133:0000000:065"t"GSM1401578"t"GSM1401513"
"GSE58133"t"GSE58133:0000000:066"t"GSM1401579"t"GSM1401513"
"GSE58133"t"GSE58133:0000000:067"t"GSM1401580"t"GSM1401513"
"GSE58133"t"GSE58133:0000000:068"t"GSM1401581"t"GSM1401513"
"GSE58133"t"GSE58133:0000000:069"t"GSM1401582"t"GSM1401513"
"GSE58133"t"GSE58133:0000000:070"t"GSM1401583"t"GSM1401513"
"GSE58133"t"GSE58133:0000000:071"t"GSM1401584"t"GSM1401513"
"GSE58133"t"GSE58133:0000000:072"t"GSM1401585"t"GSM1401513"
"GSE58133"t"GSE58133:0000000:073"t"GSM1401586"t"GSM1401513"
"GSE58133"t"GSE58133:0000000:074"t"GSM1401587"t"GSM1401513"
"GSE58133"t"GSE58133:0000000:075"t"GSM1401588"t"GSM1401513"
"GSE58133"t"GSE58133:0000000:076"t"GSM1401589"t"GSM1401513"
"GSE58133"t"GSE58133:0000000:077"t"GSM1401590"t"GSM1401513"
"GSE58133"t"GSE58133:0000000:078"t"GSM1401591"t"GSM1401513"
"GSE58133"t"GSE58133:0000000:079"t"GSM1401592"t"GSM1401513"
"GSE58133"t"GSE58133:0000000:080"t"GSM1401593"t"GSM1401513"
"GSE58133"t"GSE58133:0000000:081"t"GSM1401594"t"GSM1401513"
"GSE58133"t"GSE58133:0000000:082"t"GSM1401595"t"GSM1401513"
"GSE58133"t"GSE58133:0000000:083"t"GSM1401596"t"GSM1401513"
"GSE58133"t"GSE58133:0000000:084"t"GSM1401597"t"GSM1401513"
"GSE58133"t"GSE58133:0000000:085"t"GSM1401598"t"GSM1401513"
"GSE58133"t"GSE58133:0000000:086"t"GSM1401599"t"GSM1401513"
"GSE58133"t"GSE58133:0000000:087"t"GSM1401600"t"GSM1401513"
"GSE58133"t"GSE58133:0000000:088"t"GSM1401601"t"GSM1401513"
"GSE58133"t"GSE58133:0000000:089"t"GSM1401602"t"GSM1401513"
"GSE58133"t"GSE58133:0000000:090"t"GSM1401603"t"GSM1401513"
"GSE58133"t"GSE58133:0000000:091"t"GSM1401604"t"GSM1401513"
"GSE58133"t"GSE58133:0000000:092"t"GSM1401605"t"GSM1401513"
"GSE58133"t"GSE58133:0000000:093"t"GSM1401606"t"GSM1401513"
"GSE58133"t"GSE58133:0000000:094"t"GSM1401607"t"GSM1401513"
"GSE58133"t"GSE58133:0000000:095"t"GSM1401608"t"GSM1401513"
"GSE58133"t"GSE58133:0000000:096"t"GSM1401609"t"GSM1401513"
"GSE58133"t"GSE58133:0000000:097"t"GSM1401610"t"GSM1401513"
"GSE58133"t"GSE58133:0000000:098"t"GSM1401611"t"GSM1401513"
"GSE58133"t"GSE58133:0000000:099"t"GSM1401612"t"GSM1401513"
"GSE58133"t"GSE58133:0000000:100"t"GSM1401613"t"GSM1401513"
"GSE58133"t"GSE58133:0000000:101"t"GSM1401614"t"GSM1401513"
"GSE58133"t"GSE58133:0000000:102"t"GSM1401615"t"GSM1401513"
"GSE58133"t"GSE58133:0000000:103"t"GSM1401616"t"GSM1401513"
"GSE58133"t"GSE58133:0000000:104"t"GSM1401617"t"GSM1401513"
"GSE58133"t"GSE58133:0000000:105"t"GSM1401618"t"GSM1401513"
"GSE58133"t"GSE58133:0000000:106"t"GSM1401619"t"GSM1401513"
"GSE58133"t"GSE58133:0000000:107"t"GSM1401620"t"GSM1401513"
"GSE58133"t"GSE58133:0000000:108"t"GSM1401621"t"GSM1401513"
"GSE58133"t"GSE58133:0000000:109"t"GSM1401622"t"GSM1401513"
"GSE58133"t"GSE58133:0000000:110"t"GSM1401623"t"GSM1401513"
"GSE58133"t"GSE58133:0000000:111"t"GSM1401624"t"GSM1401513"
"GSE58133"t"GSE58133:0000000:112"t"GSM1401625"t"GSM1401513"
"GSE58133"t"GSE58133:0000000:113"t"GSM1401626"t"GSM1401513"
"GSE58133"t"GSE58133:0000000:114"t"GSM1401627"t"GSM1401513"
"GSE58133"t"GSE58133:0000000:115"t"GSM1401628"t"GSM1401513"
"GSE58133"t"GSE58133:0000000:116"t"GSM1401629"t"GSM1401513"
"GSE58133"t"GSE58133:0000000:117"t"GSM1401630"t"GSM1401513"
"GSE58133"t"GSE58133:0000000:118"t"GSM1401631"t"GSM1401513"
"GSE58133"t"GSE58133:0000000:119"t"GSM1401632"t"GSM1401513"
"GSE58142"t"GSE58142:0000000:1"t"GSM1402313;GSM1402314;GSM1402315"t"GSM1402316;GSM1402317;GSM1402318"
"GSE58149"t"GSE58149:0:1"t"GSM1402465;GSM1402467;GSM1402469"t"GSM1402477;GSM1402479;GSM1402481"
"GSE58149"t"GSE58149:0:2"t"GSM1402471;GSM1402473;GSM1402475"t"GSM1402477;GSM1402479;GSM1402481"
"GSE58149"t"GSE58149:1:1"t"GSM1402464;GSM1402466;GSM1402468"t"GSM1402476;GSM1402478;GSM1402480"
"GSE58149"t"GSE58149:1:2"t"GSM1402470;GSM1402472;GSM1402474"t"GSM1402476;GSM1402478;GSM1402480"
"GSE58161"t"GSE58161:1:1"t"GSM986014;GSM986015"t"GSM986010;GSM986011"
"GSE58161"t"GSE58161:2:1"t"GSM986016;GSM986017"t"GSM986012;GSM986013"
"GSE58173"t"GSE58173:1:1"t"GSM1402755"t"GSM1402752"
"GSE58173"t"GSE58173:1:2"t"GSM1402758"t"GSM1402752"
"GSE58173"t"GSE58173:1:3"t"GSM1402761"t"GSM1402752"
"GSE58173"t"GSE58173:1:4"t"GSM1402764"t"GSM1402752"
"GSE58173"t"GSE58173:1:5"t"GSM1402767"t"GSM1402752"
"GSE58173"t"GSE58173:2:1"t"GSM1402756"t"GSM1402753"
"GSE58173"t"GSE58173:2:2"t"GSM1402759"t"GSM1402753"
"GSE58173"t"GSE58173:2:3"t"GSM1402762"t"GSM1402753"
"GSE58173"t"GSE58173:2:4"t"GSM1402765"t"GSM1402753"
"GSE58173"t"GSE58173:2:5"t"GSM1402768"t"GSM1402753"
"GSE58173"t"GSE58173:3:1"t"GSM1402757"t"GSM1402754"
"GSE58173"t"GSE58173:3:2"t"GSM1402760"t"GSM1402754"
"GSE58173"t"GSE58173:3:3"t"GSM1402763"t"GSM1402754"
"GSE58173"t"GSE58173:3:4"t"GSM1402766"t"GSM1402754"
"GSE58173"t"GSE58173:3:5"t"GSM1402769"t"GSM1402754"
"GSE58208"t"GSE58208:0000000:1"t"GSM1403309;GSM1403310;GSM1403311;GSM1403312;GSM1403313;GSM1403314;GSM1403315;GSM1403316;GSM1403317;GSM1403318"t"GSM1403331;GSM1403332;GSM1403333;GSM1403334;GSM1403335"
"GSE58208"t"GSE58208:0000000:2"t"GSM1403319;GSM1403320;GSM1403321;GSM1403322;GSM1403323;GSM1403324;GSM1403325;GSM1403326;GSM1403327;GSM1403328;GSM1403329;GSM1403330"t"GSM1403331;GSM1403332;GSM1403333;GSM1403334;GSM1403335"
"GSE58209"t"GSE58209:0000000:1"t"GSM1403339;GSM1403340;GSM1403341"t"GSM1403336;GSM1403337;GSM1403338"
"GSE58224"t"GSE58224:1:1"t"GSM1404323;GSM1404324"t"GSM1404321;GSM1404322"
"GSE58224"t"GSE58224:1:2"t"GSM1404325;GSM1404326"t"GSM1404321;GSM1404322"
"GSE58224"t"GSE58224:1:3"t"GSM1404327;GSM1404328"t"GSM1404321;GSM1404322"
"GSE58224"t"GSE58224:2:1"t"GSM1404331;GSM1404332"t"GSM1404329;GSM1404330"
"GSE58224"t"GSE58224:2:2"t"GSM1404333;GSM1404334"t"GSM1404329;GSM1404330"
"GSE58224"t"GSE58224:2:3"t"GSM1404335;GSM1404336"t"GSM1404329;GSM1404330"
"GSE58252"t"GSE58252:0000000:1"t"GSM1405124;GSM1405125;GSM1405126"t"GSM1405127;GSM1405128;GSM1405129"
"GSE58294"t"GSE58294:0000000:1"t"GSM1406056;GSM1406057;GSM1406058;GSM1406059;GSM1406060;GSM1406061;GSM1406062;GSM1406063;GSM1406064;GSM1406065;GSM1406066;GSM1406067;GSM1406068;GSM1406069;GSM1406070;GSM1406071;GSM1406072;GSM1406073;GSM1406074;GSM1406075;GSM1406076;GSM1406077;GSM1406078;GSM1406079;GSM1406080;GSM1406081;GSM1406082;GSM1406083;GSM1406084;GSM1406085;GSM1406086;GSM1406087;GSM1406088;GSM1406089;GSM1406090;GSM1406091;GSM1406092;GSM1406093;GSM1406094;GSM1406095;GSM1406096;GSM1406097;GSM1406098;GSM1406099;GSM1406100;GSM1406101;GSM1406102;GSM1406103;GSM1406104;GSM1406105;GSM1406106;GSM1406107;GSM1406108;GSM1406109;GSM1406110;GSM1406111;GSM1406112;GSM1406113;GSM1406114;GSM1406115;GSM1406116;GSM1406117;GSM1406118;GSM1406119;GSM1406120;GSM1406121;GSM1406122;GSM1406123;GSM1406124"t"GSM1406033;GSM1406034;GSM1406035;GSM1406036;GSM1406037;GSM1406038;GSM1406039;GSM1406040;GSM1406041;GSM1406042;GSM1406043;GSM1406044;GSM1406045;GSM1406046;GSM1406047;GSM1406048;GSM1406049;GSM1406050;GSM1406051;GSM1406052;GSM1406053;GSM1406054;GSM1406055"
"GSE58435"t"GSE58435:0000000:1"t"GSM1411021;GSM1411022;GSM1411023;GSM1411024;GSM1411025"t"GSM1411026;GSM1411027;GSM1411028;GSM1411029;GSM1411030"
"GSE58475"t"GSE58475:1:1"t"GSM1412234"t"GSM1412233"
"GSE58475"t"GSE58475:2:1"t"GSM1412236"t"GSM1412235"
"GSE58475"t"GSE58475:3:1"t"GSM1412238"t"GSM1412237"
"GSE58525"t"GSE58525:0000000:1"t"GSM1412993;GSM1412994"t"GSM1412991;GSM1412992"
"GSE58565"t"GSE58565:0000000:01"t"GSM1414208"t"GSM1414207"
"GSE58565"t"GSE58565:0000000:02"t"GSM1414209"t"GSM1414207"
"GSE58565"t"GSE58565:0000000:03"t"GSM1414210"t"GSM1414207"
"GSE58565"t"GSE58565:0000000:04"t"GSM1414211"t"GSM1414207"
"GSE58565"t"GSE58565:0000000:05"t"GSM1414212"t"GSM1414207"
"GSE58565"t"GSE58565:0000000:06"t"GSM1414213"t"GSM1414207"
"GSE58565"t"GSE58565:0000000:07"t"GSM1414214"t"GSM1414207"
"GSE58565"t"GSE58565:0000000:08"t"GSM1414215"t"GSM1414207"
"GSE58565"t"GSE58565:0000000:09"t"GSM1414216"t"GSM1414207"
"GSE58565"t"GSE58565:0000000:10"t"GSM1414217"t"GSM1414207"
"GSE58565"t"GSE58565:0000000:11"t"GSM1414218"t"GSM1414207"
"GSE58565"t"GSE58565:0000000:12"t"GSM1414219"t"GSM1414207"
"GSE58565"t"GSE58565:0000000:13"t"GSM1414220"t"GSM1414207"
"GSE58565"t"GSE58565:0000000:14"t"GSM1414221"t"GSM1414207"
"GSE58565"t"GSE58565:0000000:15"t"GSM1414222"t"GSM1414207"
"GSE58565"t"GSE58565:0000000:16"t"GSM1414223"t"GSM1414207"
"GSE58573"t"GSE58573:1:1"t"GSM1414313"t"GSM1414312"
"GSE58573"t"GSE58573:2:1"t"GSM1414315"t"GSM1414314"
"GSE58588"t"GSE58588:0000000:1"t"GSM1414516;GSM1414517;GSM1414518"t"GSM1414513;GSM1414514;GSM1414515"
"GSE58589"t"GSE58589:1:1"t"GSM1414520"t"GSM1414519"
"GSE58589"t"GSE58589:1:2"t"GSM1414521"t"GSM1414519"
"GSE58589"t"GSE58589:1:3"t"GSM1414522"t"GSM1414519"
"GSE58589"t"GSE58589:1:4"t"GSM1414523"t"GSM1414519"
"GSE58589"t"GSE58589:1:5"t"GSM1414524"t"GSM1414519"
"GSE58589"t"GSE58589:2:1"t"GSM1414526"t"GSM1414525"
"GSE58589"t"GSE58589:2:2"t"GSM1414527"t"GSM1414525"
"GSE58589"t"GSE58589:2:3"t"GSM1414528"t"GSM1414525"
"GSE58589"t"GSE58589:2:4"t"GSM1414529"t"GSM1414525"
"GSE58589"t"GSE58589:2:5"t"GSM1414530"t"GSM1414525"
"GSE58589"t"GSE58589:3:1"t"GSM1414532"t"GSM1414531"
"GSE58589"t"GSE58589:3:2"t"GSM1414533"t"GSM1414531"
"GSE58589"t"GSE58589:3:3"t"GSM1414534"t"GSM1414531"
"GSE58589"t"GSE58589:3:4"t"GSM1414535"t"GSM1414531"
"GSE58589"t"GSE58589:3:5"t"GSM1414536"t"GSM1414531"
"GSE58589"t"GSE58589:3:6"t"GSM1414537"t"GSM1414531"
"GSE58605"t"GSE58605:0000000:1"t"GSM1414984;GSM1414985;GSM1414986"t"GSM1414981;GSM1414982;GSM1414983"
"GSE58605"t"GSE58605:0000000:2"t"GSM1414987;GSM1414988;GSM1414989"t"GSM1414981;GSM1414982;GSM1414983"
"GSE58667"t"GSE58667:0000000:1"t"GSM1416677;GSM1416678;GSM1416679;GSM1416680;GSM1416681;GSM1416682;GSM1416683;GSM1416684;GSM1416685;GSM1416686;GSM1416687"t"GSM1416673;GSM1416674;GSM1416675;GSM1416676"
"GSE58753"t"GSE58753:0000000:1"t"GSM1419089;GSM1419090"t"GSM1419087;GSM1419088"
"GSE58792"t"GSE58792:0000000:1"t"GSM1419623;GSM1419624;GSM1419626;GSM1419630;GSM1419633;GSM1419634;GSM1419635;GSM1419637;GSM1419639;GSM1419643;GSM1419644;GSM1419645;GSM1419646;GSM1419647;GSM1419649;GSM1419650;GSM1419651;GSM1419652;GSM1419655;GSM1419656;GSM1419659;GSM1419662;GSM1419663;GSM1419666;GSM1419667;GSM1419668;GSM1419669;GSM1419670;GSM1419671"t"GSM1419625;GSM1419627;GSM1419628;GSM1419629;GSM1419631;GSM1419632;GSM1419636;GSM1419638;GSM1419640;GSM1419641;GSM1419642;GSM1419648;GSM1419653;GSM1419654;GSM1419657;GSM1419658;GSM1419660;GSM1419661;GSM1419664;GSM1419665;GSM1419672;GSM1419673"
"GSE58831"t"GSE58831:0000000:1"t"GSM1420393;GSM1420394;GSM1420395;GSM1420396;GSM1420397;GSM1420398;GSM1420399;GSM1420400;GSM1420401;GSM1420402;GSM1420403;GSM1420404;GSM1420405;GSM1420406;GSM1420407;GSM1420408;GSM1420409;GSM1420410;GSM1420411;GSM1420412;GSM1420413;GSM1420414;GSM1420415;GSM1420416;GSM1420417;GSM1420418;GSM1420419;GSM1420420;GSM1420421;GSM1420422;GSM1420423;GSM1420424;GSM1420425;GSM1420426;GSM1420427;GSM1420428;GSM1420429;GSM1420430;GSM1420431;GSM1420432;GSM1420433;GSM1420434;GSM1420435;GSM1420436;GSM1420437;GSM1420438;GSM1420439;GSM1420440;GSM1420441;GSM1420442;GSM1420443;GSM1420444;GSM1420445;GSM1420446;GSM1420447;GSM1420448;GSM1420449;GSM1420450;GSM1420451;GSM1420452;GSM1420453;GSM1420454;GSM1420455;GSM1420456;GSM1420457;GSM1420458;GSM1420459;GSM1420460;GSM1420461;GSM1420462;GSM1420463;GSM1420464;GSM1420465;GSM1420466;GSM1420467;GSM1420468;GSM1420469;GSM1420470;GSM1420471;GSM1420472;GSM1420473;GSM1420474;GSM1420475;GSM1420476;GSM1420477;GSM1420478;GSM1420479;GSM1420480;GSM1420481;GSM1420482;GSM1420483;GSM1420484;GSM1420485;GSM1420486;GSM1420487;GSM1420488;GSM1420489;GSM1420490;GSM1420491;GSM1420492;GSM1420493;GSM1420494;GSM1420495;GSM1420496;GSM1420497;GSM1420498;GSM1420499;GSM1420500;GSM1420501;GSM1420502;GSM1420503;GSM1420504;GSM1420505;GSM1420506;GSM1420507;GSM1420508;GSM1420509;GSM1420510;GSM1420511;GSM1420512;GSM1420513;GSM1420514;GSM1420515;GSM1420516;GSM1420517;GSM1420518;GSM1420519;GSM1420520;GSM1420521;GSM1420522;GSM1420523;GSM1420524;GSM1420525;GSM1420526;GSM1420527;GSM1420528;GSM1420529;GSM1420530;GSM1420531;GSM1420532;GSM1420533;GSM1420534;GSM1420535;GSM1420536;GSM1420537;GSM1420538;GSM1420539;GSM1420540;GSM1420541;GSM1420542;GSM1420543;GSM1420544;GSM1420545;GSM1420546;GSM1420547;GSM1420548;GSM1420549;GSM1420550;GSM1420551"t"GSM1420552;GSM1420553;GSM1420554;GSM1420555;GSM1420556;GSM1420557;GSM1420558;GSM1420559;GSM1420560;GSM1420561;GSM1420562;GSM1420563;GSM1420564;GSM1420565;GSM1420566;GSM1420567;GSM1420568"
"GSE58914"t"GSE58914:0000000:1"t"GSM1422233;GSM1422234"t"GSM1422231;GSM1422232"
"GSE58914"t"GSE58914:0000000:2"t"GSM1422235;GSM1422236"t"GSM1422231;GSM1422232"
"GSE58914"t"GSE58914:0000000:3"t"GSM1422237;GSM1422238"t"GSM1422231;GSM1422232"
"GSE58914"t"GSE58914:0000000:4"t"GSM1422239;GSM1422240"t"GSM1422231;GSM1422232"
"GSE58914"t"GSE58914:0000000:5"t"GSM1422241;GSM1422242"t"GSM1422231;GSM1422232"
"GSE59125"t"GSE59125:0000000:1"t"GSM1428982;GSM1428983;GSM1428984"t"GSM1428968;GSM1428969;GSM1428970"
"GSE59125"t"GSE59125:0000000:2"t"GSM1428971;GSM1428972;GSM1428973"t"GSM1428968;GSM1428969;GSM1428970"
"GSE59125"t"GSE59125:0000000:3"t"GSM1428974;GSM1428975"t"GSM1428968;GSM1428969;GSM1428970"
"GSE59125"t"GSE59125:0000000:4"t"GSM1428976;GSM1428977;GSM1428979"t"GSM1428968;GSM1428969;GSM1428970"
"GSE59125"t"GSE59125:0000000:5"t"GSM1428978;GSM1428980;GSM1428981"t"GSM1428968;GSM1428969;GSM1428970"
"GSE59184"t"GSE59184:0:1"t"GSM1429841;GSM1429849;GSM1429857;GSM1429865"t"GSM1429840;GSM1429848;GSM1429856;GSM1429864"
"GSE59184"t"GSE59184:0:2"t"GSM1429842;GSM1429850;GSM1429858;GSM1429866"t"GSM1429840;GSM1429848;GSM1429856;GSM1429864"
"GSE59184"t"GSE59184:0:3"t"GSM1429843;GSM1429851;GSM1429859;GSM1429867"t"GSM1429840;GSM1429848;GSM1429856;GSM1429864"
"GSE59184"t"GSE59184:1:1"t"GSM1429845;GSM1429853;GSM1429861;GSM1429869"t"GSM1429844;GSM1429852;GSM1429860;GSM1429868"
"GSE59184"t"GSE59184:1:2"t"GSM1429846;GSM1429854;GSM1429862;GSM1429870"t"GSM1429844;GSM1429852;GSM1429860;GSM1429868"
"GSE59184"t"GSE59184:1:3"t"GSM1429847;GSM1429855;GSM1429863;GSM1429871"t"GSM1429844;GSM1429852;GSM1429860;GSM1429868"
"GSE59226"t"GSE59226:0000000:1"t"GSM1430960;GSM1430961"t"GSM1430958;GSM1430959"
"GSE59226"t"GSE59226:0000000:2"t"GSM1430962;GSM1430963"t"GSM1430958;GSM1430959"
"GSE59228"t"GSE59228:1:1"t"GSM1430998;GSM1430999;GSM1431000;GSM1431001"t"GSM1430994;GSM1430995;GSM1430996;GSM1430997"
"GSE59228"t"GSE59228:2:1"t"GSM1431006;GSM1431007;GSM1431008;GSM1431009"t"GSM1431002;GSM1431003;GSM1431004;GSM1431005"
"GSE59229"t"GSE59229:0000000:1"t"GSM1431014;GSM1431015;GSM1431016;GSM1431017"t"GSM1431010;GSM1431011;GSM1431012;GSM1431013"
"GSE59229"t"GSE59229:0000000:2"t"GSM1431018;GSM1431019;GSM1431020;GSM1431021"t"GSM1431010;GSM1431011;GSM1431012;GSM1431013"
"GSE59237"t"GSE59237:1:1"t"GSM1431120;GSM1431121;GSM1431122;GSM1431123;GSM1431124"t"GSM1431116;GSM1431117;GSM1431118;GSM1431119"
"GSE59237"t"GSE59237:1:2"t"GSM1431125;GSM1431126;GSM1431127"t"GSM1431116;GSM1431117;GSM1431118;GSM1431119"
"GSE59307"t"GSE59307:0000000:1"t"GSM1434743;GSM1434745;GSM1434746;GSM1434747;GSM1434748;GSM1434750;GSM1434752"t"GSM1434757;GSM1434758;GSM1434759;GSM1434760;GSM1434761;GSM1434762;GSM1434763;GSM1434764"
"GSE59307"t"GSE59307:0000000:2"t"GSM1434744;GSM1434754"t"GSM1434757;GSM1434758;GSM1434759;GSM1434760;GSM1434761;GSM1434762;GSM1434763;GSM1434764"
"GSE59307"t"GSE59307:0000000:3"t"GSM1434749;GSM1434753;GSM1434755;GSM1434756"t"GSM1434757;GSM1434758;GSM1434759;GSM1434760;GSM1434761;GSM1434762;GSM1434763;GSM1434764"
"GSE59307"t"GSE59307:0000000:4"t"GSM1434751"t"GSM1434757;GSM1434758;GSM1434759;GSM1434760;GSM1434761;GSM1434762;GSM1434763;GSM1434764"
"GSE59312"t"GSE59312:0000000:1"t"GSM1434863;GSM1434864;GSM1434865;GSM1434866;GSM1434867;GSM1434868;GSM1434869;GSM1434870;GSM1434871;GSM1434872;GSM1434873;GSM1434874;GSM1434875;GSM1434876;GSM1434877;GSM1434878;GSM1434879;GSM1434880;GSM1434881;GSM1434882;GSM1434883;GSM1434884;GSM1434885;GSM1434886;GSM1434887;GSM1434888;GSM1434889;GSM1434890;GSM1434891;GSM1434892;GSM1434893;GSM1434894;GSM1434895;GSM1434896;GSM1434897;GSM1434898;GSM1434899;GSM1434900;GSM1434901;GSM1434902;GSM1434903;GSM1434904;GSM1434905;GSM1434906;GSM1434907;GSM1434908;GSM1434909;GSM1434910;GSM1434911;GSM1434912;GSM1434913;GSM1434914;GSM1434915;GSM1434916;GSM1434917;GSM1434918;GSM1434919;GSM1434920;GSM1434921"t"GSM1434922;GSM1434923;GSM1434924;GSM1434925;GSM1434926;GSM1434927;GSM1434928;GSM1434929;GSM1434930;GSM1434931;GSM1434932;GSM1434933;GSM1434934;GSM1434935;GSM1434936;GSM1434937;GSM1434938;GSM1434939;GSM1434940;GSM1434941"
"GSE59361"t"GSE59361:0000000:1"t"GSM1435752;GSM1435754"t"GSM1435751;GSM1435753"
"GSE59412"t"GSE59412:1:1"t"GSM1436583;GSM1436585;GSM1436587;GSM1436589"t"GSM1436582;GSM1436584;GSM1436586;GSM1436588"
"GSE59412"t"GSE59412:2:1"t"GSM1436562;GSM1436563;GSM1436568;GSM1436569;GSM1436574;GSM1436575;GSM1436580;GSM1436581"t"GSM1436558;GSM1436559;GSM1436564;GSM1436565;GSM1436570;GSM1436571;GSM1436576;GSM1436577"
"GSE59412"t"GSE59412:2:2"t"GSM1436560;GSM1436561;GSM1436566;GSM1436567;GSM1436572;GSM1436573;GSM1436578;GSM1436579"t"GSM1436558;GSM1436559;GSM1436564;GSM1436565;GSM1436570;GSM1436571;GSM1436576;GSM1436577"
"GSE59424"t"GSE59424:0000000:1"t"GSM1436778"t"GSM1436777"
"GSE59424"t"GSE59424:0000000:2"t"GSM1436779"t"GSM1436777"
"GSE59445"t"GSE59445:0:1"t"GSM1436974;GSM1436975;GSM1436976"t"GSM1436968;GSM1436969;GSM1436970"
"GSE59445"t"GSE59445:1:1"t"GSM1436977;GSM1436978;GSM1436979"t"GSM1436971;GSM1436972;GSM1436973"
"GSE59653"t"GSE59653:0000000:1"t"GSM1441472"t"GSM1441473"
"GSE59665"t"GSE59665:0:1"t"GSM941938;GSM941939;GSM941940"t"GSM941941;GSM941942;GSM941943"
"GSE59665"t"GSE59665:1:1"t"GSM1442093;GSM1442094;GSM1442095"t"GSM1442091;GSM1442092"
"GSE59665"t"GSE59665:2:1"t"GSM1442099;GSM1442100;GSM1442101"t"GSM1442096;GSM1442097;GSM1442098"
"GSE59665"t"GSE59665:3:1"t"GSM1442105;GSM1442106;GSM1442107"t"GSM1442102;GSM1442103;GSM1442104"
"GSE59666"t"GSE59666:0:1"t"GSM517904;GSM517905;GSM517906;GSM1039980;GSM1039981;GSM1039982"t"GSM1039983;GSM1039984;GSM1039985"
"GSE59666"t"GSE59666:1:1"t"GSM1442110;GSM1442111;GSM1442112"t"GSM1442108;GSM1442109"
"GSE59666"t"GSE59666:2:1"t"GSM1442116;GSM1442117;GSM1442118"t"GSM1442113;GSM1442114;GSM1442115"
"GSE59666"t"GSE59666:3:1"t"GSM1442122;GSM1442123;GSM1442124"t"GSM1442119;GSM1442120;GSM1442121"
"GSE59704"t"GSE59704:0000000:1"t"GSM1443865"t"GSM1443869;GSM1443871"
"GSE59704"t"GSE59704:0000000:2"t"GSM1443866"t"GSM1443869;GSM1443871"
"GSE59704"t"GSE59704:0000000:3"t"GSM1443867"t"GSM1443869;GSM1443871"
"GSE59704"t"GSE59704:0000000:4"t"GSM1443868"t"GSM1443869;GSM1443871"
"GSE59704"t"GSE59704:0000000:5"t"GSM1443870"t"GSM1443869;GSM1443871"
"GSE59746"t"GSE59746:0000000:1"t"GSM1446004;GSM1446005"t"GSM1446008;GSM1446009"
"GSE59746"t"GSE59746:0000000:2"t"GSM1446006;GSM1446007"t"GSM1446008;GSM1446009"
"GSE59771"t"GSE59771:0000000:1"t"GSM1446283;GSM1446285"t"GSM1446282;GSM1446284"
"GSE59780"t"GSE59780:1:1"t"GSM1446333"t"GSM1446332"
"GSE59780"t"GSE59780:1:2"t"GSM1446334"t"GSM1446332"
"GSE59780"t"GSE59780:2:1"t"GSM1446336"t"GSM1446335"
"GSE59780"t"GSE59780:2:2"t"GSM1446337"t"GSM1446335"
"GSE59808"t"GSE59808:0000000:01"t"GSM1446734"t"GSM1446733"
"GSE59808"t"GSE59808:0000000:02"t"GSM1446735"t"GSM1446733"
"GSE59808"t"GSE59808:0000000:03"t"GSM1446736"t"GSM1446733"
"GSE59808"t"GSE59808:0000000:04"t"GSM1446737"t"GSM1446733"
"GSE59808"t"GSE59808:0000000:05"t"GSM1446738"t"GSM1446733"
"GSE59808"t"GSE59808:0000000:06"t"GSM1446739"t"GSM1446733"
"GSE59808"t"GSE59808:0000000:07"t"GSM1446740"t"GSM1446733"
"GSE59808"t"GSE59808:0000000:08"t"GSM1446741"t"GSM1446733"
"GSE59808"t"GSE59808:0000000:09"t"GSM1446742"t"GSM1446733"
"GSE59808"t"GSE59808:0000000:10"t"GSM1446743"t"GSM1446733"
"GSE59808"t"GSE59808:0000000:11"t"GSM1446744"t"GSM1446733"
"GSE59808"t"GSE59808:0000000:12"t"GSM1446745"t"GSM1446733"
"GSE59808"t"GSE59808:0000000:13"t"GSM1446746"t"GSM1446733"
"GSE59808"t"GSE59808:0000000:14"t"GSM1446747"t"GSM1446733"
"GSE59808"t"GSE59808:0000000:15"t"GSM1446748"t"GSM1446733"
"GSE59808"t"GSE59808:0000000:16"t"GSM1446749"t"GSM1446733"
"GSE59808"t"GSE59808:0000000:17"t"GSM1446750"t"GSM1446733"
"GSE59808"t"GSE59808:0000000:18"t"GSM1446751"t"GSM1446733"
"GSE59808"t"GSE59808:0000000:19"t"GSM1446752"t"GSM1446733"
"GSE59808"t"GSE59808:0000000:20"t"GSM1446753"t"GSM1446733"
"GSE59808"t"GSE59808:0000000:21"t"GSM1446754"t"GSM1446733"
"GSE59808"t"GSE59808:0000000:22"t"GSM1446755"t"GSM1446733"
"GSE59808"t"GSE59808:0000000:23"t"GSM1446756"t"GSM1446733"
"GSE59808"t"GSE59808:0000000:24"t"GSM1446757"t"GSM1446733"
"GSE59808"t"GSE59808:0000000:25"t"GSM1446758"t"GSM1446733"
"GSE59808"t"GSE59808:0000000:26"t"GSM1446759"t"GSM1446733"
"GSE59808"t"GSE59808:0000000:27"t"GSM1446760"t"GSM1446733"
"GSE59808"t"GSE59808:0000000:28"t"GSM1446761"t"GSM1446733"
"GSE59808"t"GSE59808:0000000:29"t"GSM1446762"t"GSM1446733"
"GSE59808"t"GSE59808:0000000:30"t"GSM1446763"t"GSM1446733"
"GSE59808"t"GSE59808:0000000:31"t"GSM1446764"t"GSM1446733"
"GSE59931"t"GSE59931:0000000:1"t"GSM1462433;GSM1462434;GSM1462435"t"GSM1462436;GSM1462437;GSM1462438"
"GSE59957"t"GSE59957:0000000:1"t"GSM1462751;GSM1462752;GSM1462753"t"GSM1462754;GSM1462755;GSM1462756"
"GSE60028"t"GSE60028:01:1"t"GSM1463963;GSM1463984"t"GSM1463964;GSM1463983"
"GSE60028"t"GSE60028:02:1"t"GSM1463981;GSM1463985"t"GSM1463982;GSM1463986"
"GSE60028"t"GSE60028:03:1"t"GSM1463944"t"GSM1463945"
"GSE60028"t"GSE60028:04:1"t"GSM1463950"t"GSM1463951"
"GSE60028"t"GSE60028:05:1"t"GSM1463954;GSM1463961"t"GSM1463955;GSM1463962"
"GSE60028"t"GSE60028:06:1"t"GSM1463957"t"GSM1463958"
"GSE60028"t"GSE60028:07:1"t"GSM1463975"t"GSM1463976"
"GSE60028"t"GSE60028:08:1"t"GSM1463959"t"GSM1463960"
"GSE60028"t"GSE60028:09:1"t"GSM1463946"t"GSM1463947"
"GSE60028"t"GSE60028:11:1"t"GSM1463965"t"GSM1463966"
"GSE60028"t"GSE60028:12:1"t"GSM1463952"t"GSM1463953"
"GSE60028"t"GSE60028:13:1"t"GSM1463969"t"GSM1463970"
"GSE60028"t"GSE60028:14:1"t"GSM1463973"t"GSM1463974"
"GSE60028"t"GSE60028:15:1"t"GSM1463990"t"GSM1463989"
"GSE60028"t"GSE60028:16:1"t"GSM1463988"t"GSM1463987"
"GSE60028"t"GSE60028:17:1"t"GSM1463979"t"GSM1463980"
"GSE60028"t"GSE60028:18:1"t"GSM1463971"t"GSM1463972"
"GSE60028"t"GSE60028:19:1"t"GSM1463948"t"GSM1463949"
"GSE60028"t"GSE60028:21:1"t"GSM1463967"t"GSM1463968"
"GSE60028"t"GSE60028:22:1"t"GSM1463977"t"GSM1463978"
"GSE60123"t"GSE60123:0000000:1"t"GSM1465326;GSM1465327;GSM1465328"t"GSM1465323;GSM1465324;GSM1465325"
"GSE60124"t"GSE60124:0000000:1"t"GSM1465332;GSM1465333"t"GSM1465329;GSM1465330;GSM1465331"
"GSE60135"t"GSE60135:0000000:1"t"GSM1466208;GSM1466209;GSM1466210"t"GSM1466205;GSM1466206;GSM1466207"
"GSE60135"t"GSE60135:0000000:2"t"GSM1466211;GSM1466212;GSM1466213"t"GSM1466205;GSM1466206;GSM1466207"
"GSE60135"t"GSE60135:0000000:3"t"GSM1466214;GSM1466215;GSM1466216"t"GSM1466205;GSM1466206;GSM1466207"
"GSE60159"t"GSE60159:0000000:1"t"GSM1466740;GSM1466746"t"GSM1466739;GSM1466745"
"GSE60159"t"GSE60159:0000000:2"t"GSM1466741;GSM1466747"t"GSM1466739;GSM1466745"
"GSE60159"t"GSE60159:0000000:3"t"GSM1466742;GSM1466748"t"GSM1466739;GSM1466745"
"GSE60159"t"GSE60159:0000000:4"t"GSM1466743;GSM1466749"t"GSM1466739;GSM1466745"
"GSE60159"t"GSE60159:0000000:5"t"GSM1466744;GSM1466750"t"GSM1466739;GSM1466745"
"GSE60184"t"GSE60184:0000000:01"t"GSM1467013"t"GSM1467012"
"GSE60184"t"GSE60184:0000000:02"t"GSM1467014"t"GSM1467012"
"GSE60184"t"GSE60184:0000000:03"t"GSM1467015"t"GSM1467012"
"GSE60184"t"GSE60184:0000000:04"t"GSM1467016"t"GSM1467012"
"GSE60184"t"GSE60184:0000000:05"t"GSM1467017"t"GSM1467012"
"GSE60184"t"GSE60184:0000000:06"t"GSM1467018"t"GSM1467012"
"GSE60184"t"GSE60184:0000000:07"t"GSM1467019"t"GSM1467012"
"GSE60184"t"GSE60184:0000000:08"t"GSM1467020"t"GSM1467012"
"GSE60184"t"GSE60184:0000000:09"t"GSM1467021"t"GSM1467012"
"GSE60184"t"GSE60184:0000000:10"t"GSM1467022"t"GSM1467012"
"GSE60184"t"GSE60184:0000000:11"t"GSM1467023"t"GSM1467012"
"GSE60184"t"GSE60184:0000000:12"t"GSM1467024"t"GSM1467012"
"GSE60184"t"GSE60184:0000000:13"t"GSM1467025"t"GSM1467012"
"GSE60184"t"GSE60184:0000000:14"t"GSM1467026"t"GSM1467012"
"GSE60184"t"GSE60184:0000000:15"t"GSM1467027"t"GSM1467012"
"GSE60184"t"GSE60184:0000000:16"t"GSM1467028"t"GSM1467012"
"GSE60184"t"GSE60184:0000000:17"t"GSM1467029"t"GSM1467012"
"GSE60184"t"GSE60184:0000000:18"t"GSM1467030"t"GSM1467012"
"GSE60184"t"GSE60184:0000000:19"t"GSM1467031"t"GSM1467012"
"GSE60184"t"GSE60184:0000000:20"t"GSM1467032"t"GSM1467012"
"GSE60184"t"GSE60184:0000000:21"t"GSM1467033"t"GSM1467012"
"GSE60184"t"GSE60184:0000000:22"t"GSM1467034"t"GSM1467012"
"GSE60291"t"GSE60291:0000000:1"t"GSM1470348;GSM1470350;GSM1470352"t"GSM1470347;GSM1470349;GSM1470351"
"GSE60327"t"GSE60327:1:1"t"GSM1471689"t"GSM1471688"
"GSE60327"t"GSE60327:2:1"t"GSM1471691"t"GSM1471690"
"GSE60518"t"GSE60518:1:1"t"GSM1481580;GSM1481582"t"GSM1481576;GSM1481578"
"GSE60518"t"GSE60518:2:1"t"GSM1481581;GSM1481583"t"GSM1481577;GSM1481579"
"GSE60616"t"GSE60616:0000000:1"t"GSM1483709"t"GSM1483708"
"GSE60697"t"GSE60697:0000000:1"t"GSM1486041;GSM1486042;GSM1486043;GSM1486044;GSM1486045;GSM1486046;GSM1486047"t"GSM1486028;GSM1486029;GSM1486030;GSM1486031;GSM1486032;GSM1486033;GSM1486034;GSM1486035;GSM1486036;GSM1486037;GSM1486038;GSM1486039;GSM1486040"
"GSE60771"t"GSE60771:0:1"t"GSM1488227;GSM1488235"t"GSM1488226;GSM1488234"
"GSE60771"t"GSE60771:1:1"t"GSM1488229;GSM1488237"t"GSM1488228;GSM1488236"
"GSE60771"t"GSE60771:2:1"t"GSM1488231;GSM1488239"t"GSM1488230;GSM1488238"
"GSE60771"t"GSE60771:3:1"t"GSM1488233;GSM1488241"t"GSM1488232;GSM1488240"
"GSE60878"t"GSE60878:0000000:1"t"GSM1492779"t"GSM1492778"
"GSE60878"t"GSE60878:0000000:2"t"GSM1492780"t"GSM1492778"
"GSE60879"t"GSE60879:0000000:1"t"GSM1492782"t"GSM1492781"
"GSE60879"t"GSE60879:0000000:2"t"GSM1492783"t"GSM1492781"
"GSE60948"t"GSE60948:0000000:1"t"GSM1494401"t"GSM1494400"
"GSE60948"t"GSE60948:0000000:2"t"GSM1494402"t"GSM1494400"
"GSE60948"t"GSE60948:0000000:3"t"GSM1494403"t"GSM1494400"
"GSE61007"t"GSE61007:0000000:1"t"GSM1495488"t"GSM1495487"
"GSE61007"t"GSE61007:0000000:2"t"GSM1495489"t"GSM1495487"
"GSE61007"t"GSE61007:0000000:3"t"GSM1495490"t"GSM1495487"
"GSE61050"t"GSE61050:1:1"t"GSM1495965"t"GSM1495966"
"GSE61050"t"GSE61050:2:1"t"GSM1495967"t"GSM1495968"
"GSE61171"t"GSE61171:1:1"t"GSM1498883"t"GSM1498884"
"GSE61171"t"GSE61171:2:1"t"GSM1498885"t"GSM1498886"
"GSE61226"t"GSE61226:0000000:1"t"GSM1499904"t"GSM1499903"
"GSE61226"t"GSE61226:0000000:2"t"GSM1499905"t"GSM1499903"
"GSE61226"t"GSE61226:0000000:3"t"GSM1499906"t"GSM1499903"
"GSE61275"t"GSE61275:1:1"t"GSM1501286"t"GSM1501287"
"GSE61275"t"GSE61275:2:1"t"GSM1501288"t"GSM1501289"
"GSE61277"t"GSE61277:0000000:1"t"GSM1501399;GSM1501400;GSM1501401"t"GSM1501396;GSM1501397;GSM1501398"
"GSE61314"t"GSE61314:1:1"t"GSM1501969"t"GSM1501968"
"GSE61314"t"GSE61314:2:1"t"GSM1501971"t"GSM1501970"
"GSE61352"t"GSE61352:0000000:1"t"GSM1502774;GSM1502775;GSM1502776"t"GSM1502771;GSM1502772;GSM1502773"
"GSE61353"t"GSE61353:0000000:1"t"GSM1502779;GSM1502780;GSM1502781;GSM1502783"t"GSM1502777"
"GSE61353"t"GSE61353:0000000:2"t"GSM1502778;GSM1502782;GSM1502784"t"GSM1502777"
"GSE61381"t"GSE61381:0000000:1"t"GSM1503535;GSM1503536;GSM1503537"t"GSM1503532;GSM1503533;GSM1503534"
"GSE61399"t"GSE61399:1:1"t"GSM1503931;GSM1503932;GSM1503933;GSM1503934;GSM1503935;GSM1503936;GSM1503937;GSM1503938;GSM1503939"t"GSM1503928;GSM1503929;GSM1503930"
"GSE61399"t"GSE61399:2:1"t"GSM1503949;GSM1503950;GSM1503952;GSM1503953;GSM1503954;GSM1503955;GSM1503956;GSM1503957"t"GSM1503940;GSM1503941;GSM1503942;GSM1503943;GSM1503944;GSM1503945;GSM1503946;GSM1503947;GSM1503948"
"GSE61513"t"GSE61513:0000000:1"t"GSM1507238;GSM1507239;GSM1507240"t"GSM1507235;GSM1507236;GSM1507237"
"GSE61513"t"GSE61513:0000000:2"t"GSM1507241;GSM1507242;GSM1507243"t"GSM1507235;GSM1507236;GSM1507237"
"GSE61513"t"GSE61513:0000000:3"t"GSM1507244;GSM1507245;GSM1507246"t"GSM1507235;GSM1507236;GSM1507237"
"GSE61513"t"GSE61513:0000000:4"t"GSM1507247;GSM1507248;GSM1507249"t"GSM1507235;GSM1507236;GSM1507237"
"GSE61635"t"GSE61635:0000000:1"t"GSM1509610;GSM1509611;GSM1509612;GSM1509613;GSM1509614;GSM1509615;GSM1509616;GSM1509617;GSM1509618;GSM1509619;GSM1509620;GSM1509621;GSM1509622;GSM1509623;GSM1509624;GSM1509625;GSM1509626;GSM1509627;GSM1509628;GSM1509629;GSM1509630;GSM1509631;GSM1509632;GSM1509633;GSM1509634;GSM1509635;GSM1509636;GSM1509637;GSM1509638;GSM1509639;GSM1509640;GSM1509641;GSM1509642;GSM1509643;GSM1509644;GSM1509645;GSM1509646;GSM1509647;GSM1509648;GSM1509649;GSM1509650;GSM1509651;GSM1509652;GSM1509653;GSM1509654;GSM1509655;GSM1509656;GSM1509657;GSM1509658;GSM1509659;GSM1509660;GSM1509661;GSM1509662;GSM1509663;GSM1509664;GSM1509665;GSM1509666;GSM1509667;GSM1509668;GSM1509669;GSM1509670;GSM1509671;GSM1509672;GSM1509673;GSM1509674;GSM1509675;GSM1509676;GSM1509677;GSM1509678;GSM1509679;GSM1509680;GSM1509681;GSM1509682;GSM1509683;GSM1509684;GSM1509685;GSM1509686;GSM1509687;GSM1509688;GSM1509689;GSM1509690;GSM1509691;GSM1509692;GSM1509693;GSM1509694;GSM1509695;GSM1509696;GSM1509697;GSM1509698;GSM1509699;GSM1509700;GSM1509701;GSM1509702;GSM1509703;GSM1509704;GSM1509705;GSM1509706;GSM1509707;GSM1509708"t"GSM1509709;GSM1509710;GSM1509711;GSM1509712;GSM1509713;GSM1509714;GSM1509715;GSM1509716;GSM1509717;GSM1509718;GSM1509719;GSM1509720;GSM1509721;GSM1509722;GSM1509723;GSM1509724;GSM1509725;GSM1509726;GSM1509727;GSM1509728;GSM1509729;GSM1509730;GSM1509731;GSM1509732;GSM1509733;GSM1509734;GSM1509735;GSM1509736;GSM1509737;GSM1509738"
"GSE61804"t"GSE61804:0000000:1"t"GSM1514040;GSM1514041;GSM1514059;GSM1514063;GSM1514066;GSM1514092;GSM1514094;GSM1514104;GSM1514120;GSM1514132;GSM1514133;GSM1514138;GSM1514142;GSM1514143;GSM1514145;GSM1514146;GSM1514151;GSM1514164;GSM1514166;GSM1514167;GSM1514174;GSM1514179;GSM1514181;GSM1514200;GSM1514204;GSM1514209;GSM1514213;GSM1514226;GSM1514230;GSM1514243;GSM1514247;GSM1514257;GSM1514258;GSM1514260;GSM1514271;GSM1514289;GSM1514290;GSM1514307;GSM1514313;GSM1514317;GSM1514318;GSM1514321;GSM1514322;GSM1514327;GSM1514339;GSM1514342;GSM1514343;GSM1514344;GSM1514350;GSM1514354"t"GSM1514033;GSM1514034;GSM1514035;GSM1514036;GSM1514037;GSM1514038;GSM1514039;GSM1514042;GSM1514043;GSM1514044;GSM1514045;GSM1514046;GSM1514047;GSM1514048;GSM1514049;GSM1514050;GSM1514051;GSM1514052;GSM1514053;GSM1514054;GSM1514055;GSM1514056;GSM1514057;GSM1514058;GSM1514060;GSM1514061;GSM1514062;GSM1514064;GSM1514065;GSM1514067;GSM1514068;GSM1514069;GSM1514070;GSM1514071;GSM1514072;GSM1514074;GSM1514075;GSM1514078;GSM1514080;GSM1514081;GSM1514083;GSM1514084;GSM1514085;GSM1514086;GSM1514087;GSM1514088;GSM1514089;GSM1514090;GSM1514091;GSM1514093;GSM1514095;GSM1514096;GSM1514097;GSM1514098;GSM1514099;GSM1514100;GSM1514101;GSM1514102;GSM1514103;GSM1514105;GSM1514106;GSM1514107;GSM1514108;GSM1514109;GSM1514110;GSM1514111;GSM1514112;GSM1514113;GSM1514114;GSM1514115;GSM1514116;GSM1514117;GSM1514118;GSM1514119;GSM1514121;GSM1514122;GSM1514123;GSM1514124;GSM1514125;GSM1514127;GSM1514128;GSM1514129;GSM1514130;GSM1514131;GSM1514134;GSM1514135;GSM1514136;GSM1514137;GSM1514139;GSM1514140;GSM1514141;GSM1514144;GSM1514147;GSM1514148;GSM1514149;GSM1514150;GSM1514153;GSM1514155;GSM1514156;GSM1514157;GSM1514158;GSM1514160;GSM1514161;GSM1514163;GSM1514165;GSM1514168;GSM1514169;GSM1514170;GSM1514171;GSM1514172;GSM1514173;GSM1514175;GSM1514176;GSM1514177;GSM1514180;GSM1514182;GSM1514183;GSM1514184;GSM1514185;GSM1514186;GSM1514187;GSM1514188;GSM1514189;GSM1514190;GSM1514191;GSM1514193;GSM1514194;GSM1514195;GSM1514196;GSM1514198;GSM1514199;GSM1514201;GSM1514202;GSM1514203;GSM1514205;GSM1514206;GSM1514207;GSM1514208;GSM1514211;GSM1514212;GSM1514214;GSM1514215;GSM1514216;GSM1514217;GSM1514218;GSM1514219;GSM1514220;GSM1514222;GSM1514223;GSM1514224;GSM1514225;GSM1514227;GSM1514228;GSM1514229;GSM1514231;GSM1514232;GSM1514233;GSM1514234;GSM1514235;GSM1514236;GSM1514237;GSM1514238;GSM1514239;GSM1514240;GSM1514241;GSM1514242;GSM1514244;GSM1514246;GSM1514248;GSM1514249;GSM1514251;GSM1514252;GSM1514253;GSM1514254;GSM1514256;GSM1514261;GSM1514262;GSM1514263;GSM1514264;GSM1514265;GSM1514266;GSM1514267;GSM1514268;GSM1514269;GSM1514270;GSM1514274;GSM1514275;GSM1514278;GSM1514279;GSM1514280;GSM1514281;GSM1514282;GSM1514283;GSM1514284;GSM1514285;GSM1514286;GSM1514287;GSM1514288;GSM1514292;GSM1514295;GSM1514296;GSM1514297;GSM1514298;GSM1514299;GSM1514300;GSM1514301;GSM1514302;GSM1514303;GSM1514304;GSM1514305;GSM1514306;GSM1514308;GSM1514309;GSM1514311;GSM1514312;GSM1514314;GSM1514315;GSM1514316;GSM1514320;GSM1514323;GSM1514324;GSM1514325;GSM1514326;GSM1514328;GSM1514329;GSM1514330;GSM1514331;GSM1514332;GSM1514333;GSM1514334;GSM1514335;GSM1514337;GSM1514338;GSM1514340;GSM1514341;GSM1514345;GSM1514347;GSM1514348;GSM1514349;GSM1514352;GSM1514353;GSM1514355;GSM1514356"
"GSE61827"t"GSE61827:0:1"t"GSM1515433;GSM1515434"t"GSM1515429;GSM1515430"
"GSE61827"t"GSE61827:1:1"t"GSM1515435;GSM1515436"t"GSM1515431;GSM1515432"
"GSE61842"t"GSE61842:1:1"t"GSM1515563"t"GSM1515562"
"GSE61842"t"GSE61842:2:1"t"GSM1515565"t"GSM1515564"
"GSE61842"t"GSE61842:3:1"t"GSM1515567"t"GSM1515566"
"GSE61942"t"GSE61942:1:1"t"GSM1517521;GSM1517522;GSM1517523"t"GSM1517524;GSM1517525;GSM1517526"
"GSE61942"t"GSE61942:2:1"t"GSM1517527;GSM1517528;GSM1517529"t"GSM1517530;GSM1517531;GSM1517532"
"GSE61973"t"GSE61973:0000000:1"t"GSM1517806;GSM1517807;GSM1517808"t"GSM1517803;GSM1517804;GSM1517805"
"GSE62080"t"GSE62080:0000000:1"t"GSM1519419;GSM1519421;GSM1519422;GSM1519425;GSM1519426;GSM1519427;GSM1519432;GSM1519433;GSM1519434;GSM1519435;GSM1519436;GSM1519438"t"GSM1519418;GSM1519420;GSM1519423;GSM1519424;GSM1519428;GSM1519429;GSM1519430;GSM1519431;GSM1519437"
"GSE62114"t"GSE62114:0000000:1"t"GSM1519867"t"GSM1519868"
"GSE62114"t"GSE62114:0000000:2"t"GSM1519866"t"GSM1519868"
"GSE62114"t"GSE62114:0000000:3"t"GSM1519865"t"GSM1519868"
"GSE62156"t"GSE62156:0000000:01"t"GSM1520504"t"GSM1520503"
"GSE62156"t"GSE62156:0000000:02"t"GSM1520505"t"GSM1520503"
"GSE62156"t"GSE62156:0000000:03"t"GSM1520506"t"GSM1520503"
"GSE62156"t"GSE62156:0000000:04"t"GSM1520507"t"GSM1520503"
"GSE62156"t"GSE62156:0000000:05"t"GSM1520508"t"GSM1520503"
"GSE62156"t"GSE62156:0000000:06"t"GSM1520509"t"GSM1520503"
"GSE62156"t"GSE62156:0000000:07"t"GSM1520510"t"GSM1520503"
"GSE62156"t"GSE62156:0000000:08"t"GSM1520511"t"GSM1520503"
"GSE62156"t"GSE62156:0000000:09"t"GSM1520512"t"GSM1520503"
"GSE62156"t"GSE62156:0000000:10"t"GSM1520513"t"GSM1520503"
"GSE62156"t"GSE62156:0000000:11"t"GSM1520514"t"GSM1520503"
"GSE62156"t"GSE62156:0000000:12"t"GSM1520515"t"GSM1520503"
"GSE62156"t"GSE62156:0000000:13"t"GSM1520516"t"GSM1520503"
"GSE62156"t"GSE62156:0000000:14"t"GSM1520517"t"GSM1520503"
"GSE62156"t"GSE62156:0000000:15"t"GSM1520518"t"GSM1520503"
"GSE62156"t"GSE62156:0000000:16"t"GSM1520519"t"GSM1520503"
"GSE62156"t"GSE62156:0000000:17"t"GSM1520520"t"GSM1520503"
"GSE62156"t"GSE62156:0000000:18"t"GSM1520521"t"GSM1520503"
"GSE62156"t"GSE62156:0000000:19"t"GSM1520522"t"GSM1520503"
"GSE62156"t"GSE62156:0000000:20"t"GSM1520523"t"GSM1520503"
"GSE62156"t"GSE62156:0000000:21"t"GSM1520524"t"GSM1520503"
"GSE62156"t"GSE62156:0000000:22"t"GSM1520525"t"GSM1520503"
"GSE62156"t"GSE62156:0000000:23"t"GSM1520526"t"GSM1520503"
"GSE62156"t"GSE62156:0000000:24"t"GSM1520527"t"GSM1520503"
"GSE62156"t"GSE62156:0000000:25"t"GSM1520528"t"GSM1520503"
"GSE62156"t"GSE62156:0000000:26"t"GSM1520529"t"GSM1520503"
"GSE62156"t"GSE62156:0000000:27"t"GSM1520530"t"GSM1520503"
"GSE62156"t"GSE62156:0000000:28"t"GSM1520531"t"GSM1520503"
"GSE62156"t"GSE62156:0000000:29"t"GSM1520532"t"GSM1520503"
"GSE62156"t"GSE62156:0000000:30"t"GSM1520533"t"GSM1520503"
"GSE62156"t"GSE62156:0000000:31"t"GSM1520534"t"GSM1520503"
"GSE62156"t"GSE62156:0000000:32"t"GSM1520535"t"GSM1520503"
"GSE62156"t"GSE62156:0000000:33"t"GSM1520536"t"GSM1520503"
"GSE62156"t"GSE62156:0000000:34"t"GSM1520537"t"GSM1520503"
"GSE62156"t"GSE62156:0000000:35"t"GSM1520538"t"GSM1520503"
"GSE62156"t"GSE62156:0000000:36"t"GSM1520539"t"GSM1520503"
"GSE62156"t"GSE62156:0000000:37"t"GSM1520540"t"GSM1520503"
"GSE62156"t"GSE62156:0000000:38"t"GSM1520541"t"GSM1520503"
"GSE62156"t"GSE62156:0000000:39"t"GSM1520542"t"GSM1520503"
"GSE62156"t"GSE62156:0000000:40"t"GSM1520543"t"GSM1520503"
"GSE62156"t"GSE62156:0000000:41"t"GSM1520544"t"GSM1520503"
"GSE62156"t"GSE62156:0000000:42"t"GSM1520545"t"GSM1520503"
"GSE62156"t"GSE62156:0000000:43"t"GSM1520546"t"GSM1520503"
"GSE62156"t"GSE62156:0000000:44"t"GSM1520547"t"GSM1520503"
"GSE62156"t"GSE62156:0000000:45"t"GSM1520548"t"GSM1520503"
"GSE62156"t"GSE62156:0000000:46"t"GSM1520549"t"GSM1520503"
"GSE62156"t"GSE62156:0000000:47"t"GSM1520550"t"GSM1520503"
"GSE62156"t"GSE62156:0000000:48"t"GSM1520551"t"GSM1520503"
"GSE62156"t"GSE62156:0000000:49"t"GSM1520552"t"GSM1520503"
"GSE62156"t"GSE62156:0000000:50"t"GSM1520553"t"GSM1520503"
"GSE62156"t"GSE62156:0000000:51"t"GSM1520554"t"GSM1520503"
"GSE62156"t"GSE62156:0000000:52"t"GSM1520555"t"GSM1520503"
"GSE62156"t"GSE62156:0000000:53"t"GSM1520556"t"GSM1520503"
"GSE62156"t"GSE62156:0000000:54"t"GSM1520557"t"GSM1520503"
"GSE62156"t"GSE62156:0000000:55"t"GSM1520558"t"GSM1520503"
"GSE62156"t"GSE62156:0000000:56"t"GSM1520559"t"GSM1520503"
"GSE62156"t"GSE62156:0000000:57"t"GSM1520560"t"GSM1520503"
"GSE62156"t"GSE62156:0000000:58"t"GSM1520561"t"GSM1520503"
"GSE62156"t"GSE62156:0000000:59"t"GSM1520562"t"GSM1520503"
"GSE62156"t"GSE62156:0000000:60"t"GSM1520563"t"GSM1520503"
"GSE62156"t"GSE62156:0000000:61"t"GSM1520564"t"GSM1520503"
"GSE62156"t"GSE62156:0000000:62"t"GSM1520565"t"GSM1520503"
"GSE62156"t"GSE62156:0000000:63"t"GSM1520566"t"GSM1520503"
"GSE62203"t"GSE62203:0000000:1"t"GSM1522143;GSM1522144;GSM1522145;GSM1522146"t"GSM1522139;GSM1522140;GSM1522141;GSM1522142"
"GSE62232"t"GSE62232:0000000:1"t"GSM1523339;GSM1523340;GSM1523341;GSM1523342;GSM1523343;GSM1523344;GSM1523345;GSM1523346;GSM1523347;GSM1523348;GSM1523349;GSM1523350;GSM1523351;GSM1523352;GSM1523353;GSM1523354;GSM1523355;GSM1523356;GSM1523357;GSM1523358;GSM1523359;GSM1523360;GSM1523361;GSM1523362;GSM1523363;GSM1523364;GSM1523365;GSM1523366;GSM1523367;GSM1523368;GSM1523369;GSM1523370;GSM1523371;GSM1523372;GSM1523373;GSM1523374;GSM1523375;GSM1523376;GSM1523377;GSM1523378;GSM1523379;GSM1523380;GSM1523381;GSM1523382;GSM1523383;GSM1523384;GSM1523385;GSM1523386;GSM1523387;GSM1523388;GSM1523389;GSM1523390;GSM1523391;GSM1523392;GSM1523393;GSM1523394;GSM1523395;GSM1523396;GSM1523397;GSM1523398;GSM1523399;GSM1523400;GSM1523401;GSM1523402;GSM1523403;GSM1523404;GSM1523405;GSM1523406;GSM1523407;GSM1523408;GSM1523409;GSM1523410;GSM1523411;GSM1523412;GSM1523413;GSM1523414;GSM1523415;GSM1523416;GSM1523417;GSM1523418;GSM1523419"t"GSM1523329;GSM1523330;GSM1523331;GSM1523332;GSM1523333;GSM1523334;GSM1523335;GSM1523336;GSM1523337;GSM1523338"
"GSE62510"t"GSE62510:0000000:1"t"GSM1528088;GSM1528089;GSM1528090"t"GSM1528091;GSM1528092;GSM1528093"
"GSE62547"t"GSE62547:0000000:1"t"GSM1528698;GSM1528699;GSM1528700"t"GSM1528695;GSM1528696;GSM1528697"
"GSE62572"t"GSE62572:0000000:1"t"GSM1529489"t"GSM1529491;GSM1529492"
"GSE62572"t"GSE62572:0000000:2"t"GSM1529490"t"GSM1529491;GSM1529492"
"GSE62665"t"GSE62665:0000000:1"t"GSM1531181;GSM1531182;GSM1531183"t"GSM1531178;GSM1531179;GSM1531180"
"GSE62687"t"GSE62687:0:1"t"GSM1531467;GSM1531468;GSM1531469"t"GSM1531461;GSM1531462;GSM1531463"
"GSE62687"t"GSE62687:1:1"t"GSM1531470;GSM1531471;GSM1531472"t"GSM1531464;GSM1531465;GSM1531466"
"GSE63009"t"GSE63009:0000000:1"t"GSM1537949;GSM1537950;GSM1537951"t"GSM1537946;GSM1537947;GSM1537948"
"GSE63009"t"GSE63009:0000000:2"t"GSM1537952;GSM1537953;GSM1537954"t"GSM1537946;GSM1537947;GSM1537948"
"GSE63067"t"GSE63067:0000000:1"t"GSM1539879;GSM1539880;GSM1539881;GSM1539882;GSM1539883;GSM1539884;GSM1539885;GSM1539886;GSM1539887"t"GSM1539888;GSM1539889;GSM1539890;GSM1539891;GSM1539892;GSM1539893;GSM1539894"
"GSE63067"t"GSE63067:0000000:2"t"GSM1539877;GSM1539878"t"GSM1539888;GSM1539889;GSM1539890;GSM1539891;GSM1539892;GSM1539893;GSM1539894"
"GSE63129"t"GSE63129:0:1"t"GSM1541872"t"GSM1541874"
"GSE63129"t"GSE63129:1:1"t"GSM1541871"t"GSM1541873"
"GSE63138"t"GSE63138:0000000:1"t"GSM1541982"t"GSM1541981"
"GSE63252"t"GSE63252:1:1"t"GSM1544477;GSM1544478;GSM1544479"t"GSM1544474;GSM1544475;GSM1544476"
"GSE63252"t"GSE63252:1:2"t"GSM1544480;GSM1544481;GSM1544482"t"GSM1544474;GSM1544475;GSM1544476"
"GSE63252"t"GSE63252:2:1"t"GSM1544486;GSM1544487;GSM1544488"t"GSM1544483;GSM1544484;GSM1544485"
"GSE63252"t"GSE63252:2:2"t"GSM1544489;GSM1544490;GSM1544491"t"GSM1544483;GSM1544484;GSM1544485"
"GSE63252"t"GSE63252:3:1"t"GSM1544495;GSM1544496;GSM1544497"t"GSM1544492;GSM1544493;GSM1544494"
"GSE63252"t"GSE63252:3:2"t"GSM1544498;GSM1544499;GSM1544500"t"GSM1544492;GSM1544493;GSM1544494"
"GSE63327"t"GSE63327:0000000:1"t"GSM1545816;GSM1545818"t"GSM1545815;GSM1545817"
"GSE63626"t"GSE63626:0000000:01"t"GSM1554139;GSM1554140;GSM1554141;GSM1554142"t"GSM1554131;GSM1554132;GSM1554133;GSM1554134;GSM1554135;GSM1554136;GSM1554137;GSM1554138"
"GSE63626"t"GSE63626:0000000:02"t"GSM1554143;GSM1554144;GSM1554145;GSM1554146;GSM1554147;GSM1554148"t"GSM1554131;GSM1554132;GSM1554133;GSM1554134;GSM1554135;GSM1554136;GSM1554137;GSM1554138"
"GSE63626"t"GSE63626:0000000:03"t"GSM1554149;GSM1554150;GSM1554151;GSM1554152;GSM1554153;GSM1554154"t"GSM1554131;GSM1554132;GSM1554133;GSM1554134;GSM1554135;GSM1554136;GSM1554137;GSM1554138"
"GSE63626"t"GSE63626:0000000:04"t"GSM1554155;GSM1554156;GSM1554157"t"GSM1554131;GSM1554132;GSM1554133;GSM1554134;GSM1554135;GSM1554136;GSM1554137;GSM1554138"
"GSE63626"t"GSE63626:0000000:05"t"GSM1554158;GSM1554159"t"GSM1554131;GSM1554132;GSM1554133;GSM1554134;GSM1554135;GSM1554136;GSM1554137;GSM1554138"
"GSE63626"t"GSE63626:0000000:06"t"GSM1554160;GSM1554161;GSM1554162"t"GSM1554131;GSM1554132;GSM1554133;GSM1554134;GSM1554135;GSM1554136;GSM1554137;GSM1554138"
"GSE63626"t"GSE63626:0000000:07"t"GSM1554163;GSM1554164;GSM1554165"t"GSM1554131;GSM1554132;GSM1554133;GSM1554134;GSM1554135;GSM1554136;GSM1554137;GSM1554138"
"GSE63626"t"GSE63626:0000000:08"t"GSM1554166;GSM1554167;GSM1554168"t"GSM1554131;GSM1554132;GSM1554133;GSM1554134;GSM1554135;GSM1554136;GSM1554137;GSM1554138"
"GSE63626"t"GSE63626:0000000:09"t"GSM1554169;GSM1554170;GSM1554171"t"GSM1554131;GSM1554132;GSM1554133;GSM1554134;GSM1554135;GSM1554136;GSM1554137;GSM1554138"
"GSE63626"t"GSE63626:0000000:10"t"GSM1554172;GSM1554173;GSM1554174"t"GSM1554131;GSM1554132;GSM1554133;GSM1554134;GSM1554135;GSM1554136;GSM1554137;GSM1554138"
"GSE63626"t"GSE63626:0000000:11"t"GSM1554175;GSM1554176;GSM1554177;GSM1554178"t"GSM1554131;GSM1554132;GSM1554133;GSM1554134;GSM1554135;GSM1554136;GSM1554137;GSM1554138"
"GSE63626"t"GSE63626:0000000:12"t"GSM1554179;GSM1554180;GSM1554181"t"GSM1554131;GSM1554132;GSM1554133;GSM1554134;GSM1554135;GSM1554136;GSM1554137;GSM1554138"
"GSE63626"t"GSE63626:0000000:13"t"GSM1554182;GSM1554183;GSM1554184"t"GSM1554131;GSM1554132;GSM1554133;GSM1554134;GSM1554135;GSM1554136;GSM1554137;GSM1554138"
"GSE63626"t"GSE63626:0000000:14"t"GSM1554185;GSM1554186;GSM1554187"t"GSM1554131;GSM1554132;GSM1554133;GSM1554134;GSM1554135;GSM1554136;GSM1554137;GSM1554138"
"GSE63626"t"GSE63626:0000000:15"t"GSM1554188;GSM1554189;GSM1554190"t"GSM1554131;GSM1554132;GSM1554133;GSM1554134;GSM1554135;GSM1554136;GSM1554137;GSM1554138"
"GSE63626"t"GSE63626:0000000:16"t"GSM1554191;GSM1554192;GSM1554193"t"GSM1554131;GSM1554132;GSM1554133;GSM1554134;GSM1554135;GSM1554136;GSM1554137;GSM1554138"
"GSE63662"t"GSE63662:0000000:1"t"GSM1554900;GSM1554902;GSM1554904"t"GSM1554899;GSM1554901;GSM1554903"
"GSE63862"t"GSE63862:0000000:1"t"GSM1558595;GSM1558596;GSM1558597"t"GSM1558598;GSM1558599;GSM1558600"
"GSE63885"t"GSE63885:0000000:1"t"GSM1559352;GSM1559379;GSM1559380;GSM1559381;GSM1559382;GSM1559383;GSM1559384;GSM1559385;GSM1559386;GSM1559387;GSM1559388;GSM1559390"t"GSM1559391;GSM1559392;GSM1559393;GSM1559394;GSM1559395;GSM1559396;GSM1559397;GSM1559398;GSM1559399"
"GSE63885"t"GSE63885:0000000:2"t"GSM1559299;GSM1559300;GSM1559301;GSM1559302;GSM1559303;GSM1559304;GSM1559305;GSM1559306;GSM1559307;GSM1559308;GSM1559309;GSM1559311;GSM1559312;GSM1559313;GSM1559314;GSM1559315;GSM1559316;GSM1559318;GSM1559320;GSM1559321;GSM1559322;GSM1559323;GSM1559324;GSM1559325;GSM1559326;GSM1559327;GSM1559328;GSM1559329;GSM1559330;GSM1559331;GSM1559332;GSM1559333;GSM1559334;GSM1559335;GSM1559336;GSM1559337;GSM1559338;GSM1559339;GSM1559341;GSM1559342;GSM1559343;GSM1559344;GSM1559345;GSM1559346;GSM1559347;GSM1559348;GSM1559349;GSM1559350;GSM1559351;GSM1559353;GSM1559354;GSM1559355;GSM1559356;GSM1559357;GSM1559358;GSM1559359;GSM1559360;GSM1559361;GSM1559362;GSM1559364;GSM1559365;GSM1559366;GSM1559367;GSM1559368;GSM1559369;GSM1559370;GSM1559371;GSM1559372;GSM1559373;GSM1559375;GSM1559376;GSM1559377"t"GSM1559391;GSM1559392;GSM1559393;GSM1559394;GSM1559395;GSM1559396;GSM1559397;GSM1559398;GSM1559399"
"GSE63885"t"GSE63885:0000000:3"t"GSM1559317"t"GSM1559391;GSM1559392;GSM1559393;GSM1559394;GSM1559395;GSM1559396;GSM1559397;GSM1559398;GSM1559399"
"GSE63885"t"GSE63885:0000000:4"t"GSM1559310;GSM1559319;GSM1559340;GSM1559363;GSM1559374;GSM1559378;GSM1559389"t"GSM1559391;GSM1559392;GSM1559393;GSM1559394;GSM1559395;GSM1559396;GSM1559397;GSM1559398;GSM1559399"
"GSE63941"t"GSE63941:0000000:01"t"GSM1560941"t"GSM1560964;GSM1560965;GSM1560966"
"GSE63941"t"GSE63941:0000000:02"t"GSM1560942"t"GSM1560964;GSM1560965;GSM1560966"
"GSE63941"t"GSE63941:0000000:03"t"GSM1560943"t"GSM1560964;GSM1560965;GSM1560966"
"GSE63941"t"GSE63941:0000000:04"t"GSM1560944"t"GSM1560964;GSM1560965;GSM1560966"
"GSE63941"t"GSE63941:0000000:05"t"GSM1560945"t"GSM1560964;GSM1560965;GSM1560966"
"GSE63941"t"GSE63941:0000000:06"t"GSM1560946"t"GSM1560964;GSM1560965;GSM1560966"
"GSE63941"t"GSE63941:0000000:07"t"GSM1560947"t"GSM1560964;GSM1560965;GSM1560966"
"GSE63941"t"GSE63941:0000000:08"t"GSM1560948"t"GSM1560964;GSM1560965;GSM1560966"
"GSE63941"t"GSE63941:0000000:09"t"GSM1560949"t"GSM1560964;GSM1560965;GSM1560966"
"GSE63941"t"GSE63941:0000000:10"t"GSM1560950"t"GSM1560964;GSM1560965;GSM1560966"
"GSE63941"t"GSE63941:0000000:11"t"GSM1560951"t"GSM1560964;GSM1560965;GSM1560966"
"GSE63941"t"GSE63941:0000000:12"t"GSM1560952"t"GSM1560964;GSM1560965;GSM1560966"
"GSE63941"t"GSE63941:0000000:13"t"GSM1560953"t"GSM1560964;GSM1560965;GSM1560966"
"GSE63941"t"GSE63941:0000000:14"t"GSM1560954"t"GSM1560964;GSM1560965;GSM1560966"
"GSE63941"t"GSE63941:0000000:15"t"GSM1560955"t"GSM1560964;GSM1560965;GSM1560966"
"GSE63941"t"GSE63941:0000000:16"t"GSM1560956"t"GSM1560964;GSM1560965;GSM1560966"
"GSE63941"t"GSE63941:0000000:17"t"GSM1560957"t"GSM1560964;GSM1560965;GSM1560966"
"GSE63941"t"GSE63941:0000000:18"t"GSM1560958"t"GSM1560964;GSM1560965;GSM1560966"
"GSE63941"t"GSE63941:0000000:19"t"GSM1560959"t"GSM1560964;GSM1560965;GSM1560966"
"GSE63941"t"GSE63941:0000000:20"t"GSM1560960"t"GSM1560964;GSM1560965;GSM1560966"
"GSE63941"t"GSE63941:0000000:21"t"GSM1560961"t"GSM1560964;GSM1560965;GSM1560966"
"GSE63941"t"GSE63941:0000000:22"t"GSM1560962"t"GSM1560964;GSM1560965;GSM1560966"
"GSE63941"t"GSE63941:0000000:23"t"GSM1560963"t"GSM1560964;GSM1560965;GSM1560966"
"GSE63995"t"GSE63995:1:1"t"GSM1562203"t"GSM1562202"
"GSE63995"t"GSE63995:2:1"t"GSM1562205"t"GSM1562204"
"GSE63995"t"GSE63995:3:1"t"GSM1562207"t"GSM1562206"
"GSE63995"t"GSE63995:4:1"t"GSM1562209"t"GSM1562208"
"GSE64023"t"GSE64023:0000000:1"t"GSM1563037;GSM1563038;GSM1563039"t"GSM1563034;GSM1563035;GSM1563036"
"GSE64023"t"GSE64023:0000000:2"t"GSM1563040;GSM1563041;GSM1563042"t"GSM1563034;GSM1563035;GSM1563036"
"GSE64028"t"GSE64028:1:1"t"GSM1563084"t"GSM1563089"
"GSE64028"t"GSE64028:1:2"t"GSM1563094"t"GSM1563089"
"GSE64028"t"GSE64028:1:3"t"GSM1563099"t"GSM1563089"
"GSE64028"t"GSE64028:2:1"t"GSM1563085"t"GSM1563090"
"GSE64028"t"GSE64028:2:2"t"GSM1563095"t"GSM1563090"
"GSE64028"t"GSE64028:2:3"t"GSM1563100"t"GSM1563090"
"GSE64028"t"GSE64028:3:1"t"GSM1563086"t"GSM1563091"
"GSE64028"t"GSE64028:3:2"t"GSM1563096"t"GSM1563091"
"GSE64028"t"GSE64028:3:3"t"GSM1563101"t"GSM1563091"
"GSE64028"t"GSE64028:4:1"t"GSM1563087"t"GSM1563092"
"GSE64028"t"GSE64028:4:2"t"GSM1563097"t"GSM1563092"
"GSE64028"t"GSE64028:4:3"t"GSM1563102"t"GSM1563092"
"GSE64028"t"GSE64028:5:1"t"GSM1563088"t"GSM1563093"
"GSE64028"t"GSE64028:5:2"t"GSM1563098"t"GSM1563093"
"GSE64028"t"GSE64028:5:3"t"GSM1563103"t"GSM1563093"
"GSE64085"t"GSE64085:0000000:01"t"GSM1564129"t"GSM1564128"
"GSE64085"t"GSE64085:0000000:02"t"GSM1564130"t"GSM1564128"
"GSE64085"t"GSE64085:0000000:03"t"GSM1564131"t"GSM1564128"
"GSE64085"t"GSE64085:0000000:04"t"GSM1564132"t"GSM1564128"
"GSE64085"t"GSE64085:0000000:05"t"GSM1564133"t"GSM1564128"
"GSE64085"t"GSE64085:0000000:06"t"GSM1564134"t"GSM1564128"
"GSE64085"t"GSE64085:0000000:07"t"GSM1564135"t"GSM1564128"
"GSE64085"t"GSE64085:0000000:08"t"GSM1564136"t"GSM1564128"
"GSE64085"t"GSE64085:0000000:09"t"GSM1564137"t"GSM1564128"
"GSE64085"t"GSE64085:0000000:10"t"GSM1564138"t"GSM1564128"
"GSE64085"t"GSE64085:0000000:11"t"GSM1564139"t"GSM1564128"
"GSE64143"t"GSE64143:0000000:1"t"GSM1565258"t"GSM1565257"
"GSE64178"t"GSE64178:0000000:1"t"GSM1565953;GSM1565954"t"GSM1565951;GSM1565952"
"GSE64322"t"GSE64322:0000000:1"t"GSM1568545"t"GSM1568552"
"GSE64322"t"GSE64322:0000000:2"t"GSM1568546"t"GSM1568552"
"GSE64322"t"GSE64322:0000000:3"t"GSM1568547"t"GSM1568552"
"GSE64322"t"GSE64322:0000000:4"t"GSM1568548"t"GSM1568552"
"GSE64322"t"GSE64322:0000000:5"t"GSM1568549"t"GSM1568552"
"GSE64322"t"GSE64322:0000000:6"t"GSM1568550"t"GSM1568552"
"GSE64322"t"GSE64322:0000000:7"t"GSM1568551"t"GSM1568552"
"GSE64322"t"GSE64322:0000000:8"t"GSM1568553"t"GSM1568552"
"GSE64322"t"GSE64322:0000000:9"t"GSM1568554"t"GSM1568552"
"GSE64480"t"GSE64480:1:1"t"GSM1572094"t"GSM1572093"
"GSE64480"t"GSE64480:1:2"t"GSM1572095"t"GSM1572093"
"GSE64480"t"GSE64480:2:1"t"GSM1572097"t"GSM1572096"
"GSE64480"t"GSE64480:2:2"t"GSM1572098"t"GSM1572096"
"GSE64480"t"GSE64480:3:1"t"GSM1572100"t"GSM1572099"
"GSE64480"t"GSE64480:3:2"t"GSM1572101"t"GSM1572099"
"GSE64555"t"GSE64555:0000000:1"t"GSM1574198;GSM1574199;GSM1574202;GSM1574203;GSM1574204;GSM1574205;GSM1574206;GSM1574207;GSM1574208;GSM1574209;GSM1574215;GSM1574216;GSM1574217;GSM1574218;GSM1574219;GSM1574220;GSM1574221;GSM1574222;GSM1574223;GSM1574224"t"GSM1574195;GSM1574196;GSM1574197;GSM1574200;GSM1574201;GSM1574210;GSM1574211;GSM1574212;GSM1574213;GSM1574214;GSM1574225;GSM1574226;GSM1574227;GSM1574228;GSM1574229;GSM1574230;GSM1574231;GSM1574232;GSM1574233;GSM1574234"
"GSE64603"t"GSE64603:0000000:1"t"GSM1575323"t"GSM1575322"
"GSE64603"t"GSE64603:0000000:2"t"GSM1575324"t"GSM1575322"
"GSE64603"t"GSE64603:0000000:3"t"GSM1575325"t"GSM1575322"
"GSE64603"t"GSE64603:0000000:4"t"GSM1575326"t"GSM1575322"
"GSE64681"t"GSE64681:0000000:1"t"GSM1576810;GSM1576811"t"GSM1576808;GSM1576809"
"GSE64762"t"GSE64762:0000000:1"t"GSM1579396"t"GSM1579395"
"GSE64762"t"GSE64762:0000000:2"t"GSM1579397"t"GSM1579395"
"GSE64762"t"GSE64762:0000000:3"t"GSM1579398"t"GSM1579395"
"GSE64857"t"GSE64857:0000000:01"t"GSM1581685"t"GSM1581684"
"GSE64857"t"GSE64857:0000000:02"t"GSM1581686"t"GSM1581684"
"GSE64857"t"GSE64857:0000000:03"t"GSM1581687"t"GSM1581684"
"GSE64857"t"GSE64857:0000000:04"t"GSM1581688"t"GSM1581684"
"GSE64857"t"GSE64857:0000000:05"t"GSM1581689"t"GSM1581684"
"GSE64857"t"GSE64857:0000000:06"t"GSM1581690"t"GSM1581684"
"GSE64857"t"GSE64857:0000000:07"t"GSM1581691"t"GSM1581684"
"GSE64857"t"GSE64857:0000000:08"t"GSM1581692"t"GSM1581684"
"GSE64857"t"GSE64857:0000000:09"t"GSM1581693"t"GSM1581684"
"GSE64857"t"GSE64857:0000000:10"t"GSM1581694"t"GSM1581684"
"GSE64857"t"GSE64857:0000000:11"t"GSM1581695"t"GSM1581684"
"GSE64857"t"GSE64857:0000000:12"t"GSM1581696"t"GSM1581684"
"GSE64857"t"GSE64857:0000000:13"t"GSM1581697"t"GSM1581684"
"GSE64857"t"GSE64857:0000000:14"t"GSM1581698"t"GSM1581684"
"GSE64857"t"GSE64857:0000000:15"t"GSM1581699"t"GSM1581684"
"GSE64857"t"GSE64857:0000000:16"t"GSM1581700"t"GSM1581684"
"GSE64857"t"GSE64857:0000000:17"t"GSM1581701"t"GSM1581684"
"GSE64857"t"GSE64857:0000000:18"t"GSM1581702"t"GSM1581684"
"GSE64857"t"GSE64857:0000000:19"t"GSM1581703"t"GSM1581684"
"GSE64857"t"GSE64857:0000000:20"t"GSM1581704"t"GSM1581684"
"GSE64857"t"GSE64857:0000000:21"t"GSM1581705"t"GSM1581684"
"GSE64857"t"GSE64857:0000000:22"t"GSM1581706"t"GSM1581684"
"GSE64857"t"GSE64857:0000000:23"t"GSM1581707"t"GSM1581684"
"GSE64857"t"GSE64857:0000000:24"t"GSM1581708"t"GSM1581684"
"GSE64857"t"GSE64857:0000000:25"t"GSM1581709"t"GSM1581684"
"GSE64857"t"GSE64857:0000000:26"t"GSM1581710"t"GSM1581684"
"GSE64857"t"GSE64857:0000000:27"t"GSM1581711"t"GSM1581684"
"GSE64857"t"GSE64857:0000000:28"t"GSM1581712"t"GSM1581684"
"GSE64857"t"GSE64857:0000000:29"t"GSM1581713"t"GSM1581684"
"GSE64857"t"GSE64857:0000000:30"t"GSM1581714"t"GSM1581684"
"GSE64857"t"GSE64857:0000000:31"t"GSM1581715"t"GSM1581684"
"GSE64857"t"GSE64857:0000000:32"t"GSM1581716"t"GSM1581684"
"GSE64857"t"GSE64857:0000000:33"t"GSM1581717"t"GSM1581684"
"GSE64857"t"GSE64857:0000000:34"t"GSM1581718"t"GSM1581684"
"GSE64857"t"GSE64857:0000000:35"t"GSM1581719"t"GSM1581684"
"GSE64857"t"GSE64857:0000000:36"t"GSM1581720"t"GSM1581684"
"GSE64857"t"GSE64857:0000000:37"t"GSM1581721"t"GSM1581684"
"GSE64857"t"GSE64857:0000000:38"t"GSM1581722"t"GSM1581684"
"GSE64857"t"GSE64857:0000000:39"t"GSM1581723"t"GSM1581684"
"GSE64857"t"GSE64857:0000000:40"t"GSM1581724"t"GSM1581684"
"GSE64857"t"GSE64857:0000000:41"t"GSM1581725"t"GSM1581684"
"GSE64857"t"GSE64857:0000000:42"t"GSM1581726"t"GSM1581684"
"GSE64857"t"GSE64857:0000000:43"t"GSM1581727"t"GSM1581684"
"GSE64857"t"GSE64857:0000000:44"t"GSM1581728"t"GSM1581684"
"GSE64857"t"GSE64857:0000000:45"t"GSM1581729"t"GSM1581684"
"GSE64857"t"GSE64857:0000000:46"t"GSM1581730"t"GSM1581684"
"GSE64857"t"GSE64857:0000000:47"t"GSM1581731"t"GSM1581684"
"GSE64857"t"GSE64857:0000000:48"t"GSM1581732"t"GSM1581684"
"GSE64857"t"GSE64857:0000000:49"t"GSM1581733"t"GSM1581684"
"GSE64857"t"GSE64857:0000000:50"t"GSM1581734"t"GSM1581684"
"GSE64857"t"GSE64857:0000000:51"t"GSM1581735"t"GSM1581684"
"GSE64857"t"GSE64857:0000000:52"t"GSM1581736"t"GSM1581684"
"GSE64857"t"GSE64857:0000000:53"t"GSM1581737"t"GSM1581684"
"GSE64857"t"GSE64857:0000000:54"t"GSM1581738"t"GSM1581684"
"GSE64857"t"GSE64857:0000000:55"t"GSM1581739"t"GSM1581684"
"GSE64857"t"GSE64857:0000000:56"t"GSM1581740"t"GSM1581684"
"GSE64857"t"GSE64857:0000000:57"t"GSM1581741"t"GSM1581684"
"GSE64857"t"GSE64857:0000000:58"t"GSM1581742"t"GSM1581684"
"GSE64857"t"GSE64857:0000000:59"t"GSM1581743"t"GSM1581684"
"GSE64857"t"GSE64857:0000000:60"t"GSM1581744"t"GSM1581684"
"GSE64857"t"GSE64857:0000000:61"t"GSM1581745"t"GSM1581684"
"GSE64857"t"GSE64857:0000000:62"t"GSM1581746"t"GSM1581684"
"GSE64857"t"GSE64857:0000000:63"t"GSM1581747"t"GSM1581684"
"GSE64857"t"GSE64857:0000000:64"t"GSM1581748"t"GSM1581684"
"GSE64857"t"GSE64857:0000000:65"t"GSM1581749"t"GSM1581684"
"GSE64857"t"GSE64857:0000000:66"t"GSM1581750"t"GSM1581684"
"GSE64857"t"GSE64857:0000000:67"t"GSM1581751"t"GSM1581684"
"GSE64857"t"GSE64857:0000000:68"t"GSM1581752"t"GSM1581684"
"GSE64857"t"GSE64857:0000000:69"t"GSM1581753"t"GSM1581684"
"GSE64857"t"GSE64857:0000000:70"t"GSM1581754"t"GSM1581684"
"GSE64857"t"GSE64857:0000000:71"t"GSM1581755"t"GSM1581684"
"GSE64857"t"GSE64857:0000000:72"t"GSM1581756"t"GSM1581684"
"GSE64857"t"GSE64857:0000000:73"t"GSM1581757"t"GSM1581684"
"GSE64857"t"GSE64857:0000000:74"t"GSM1581758"t"GSM1581684"
"GSE64857"t"GSE64857:0000000:75"t"GSM1581759"t"GSM1581684"
"GSE64857"t"GSE64857:0000000:76"t"GSM1581760"t"GSM1581684"
"GSE64857"t"GSE64857:0000000:77"t"GSM1581761"t"GSM1581684"
"GSE64857"t"GSE64857:0000000:78"t"GSM1581762"t"GSM1581684"
"GSE64857"t"GSE64857:0000000:79"t"GSM1581763"t"GSM1581684"
"GSE64857"t"GSE64857:0000000:80"t"GSM1581764"t"GSM1581684"
"GSE64890"t"GSE64890:0000000:1"t"GSM1582722"t"GSM1582721"
"GSE64951"t"GSE64951:0000000:1"t"GSM1584837;GSM1584838;GSM1584839;GSM1584840;GSM1584841;GSM1584842;GSM1584843;GSM1584844;GSM1584845;GSM1584846;GSM1584847;GSM1584848;GSM1584849;GSM1584850;GSM1584851;GSM1584852;GSM1584853;GSM1584854;GSM1584855;GSM1584856;GSM1584857;GSM1584858;GSM1584859;GSM1584860;GSM1584861;GSM1584862;GSM1584863;GSM1584864;GSM1584865;GSM1584866;GSM1584867;GSM1584868;GSM1584869;GSM1584870;GSM1584871;GSM1584872;GSM1584873;GSM1584874;GSM1584875;GSM1584876;GSM1584877;GSM1584878;GSM1584879;GSM1584880;GSM1584881;GSM1584882;GSM1584883;GSM1584884;GSM1584885;GSM1584886;GSM1584887;GSM1584888;GSM1584889;GSM1584890;GSM1584891;GSM1584892;GSM1584893;GSM1584894;GSM1584895;GSM1584896;GSM1584897;GSM1584898;GSM1584899"t"GSM1584900;GSM1584901;GSM1584902;GSM1584903;GSM1584904;GSM1584905;GSM1584906;GSM1584907;GSM1584908;GSM1584909;GSM1584910;GSM1584911;GSM1584912;GSM1584913;GSM1584914;GSM1584915;GSM1584916;GSM1584917;GSM1584918;GSM1584919;GSM1584920;GSM1584921;GSM1584922;GSM1584923;GSM1584924;GSM1584925;GSM1584926;GSM1584927;GSM1584928;GSM1584929;GSM1584930"
"GSE65009"t"GSE65009:0000000:1"t"GSM1585729;GSM1585730"t"GSM1585727;GSM1585728"
"GSE65132"t"GSE65132:0000000:1"t"GSM1587791;GSM1587792;GSM1587793;GSM1587794;GSM1587795;GSM1587796;GSM1587797"t"GSM1587798;GSM1587799"
"GSE65144"t"GSE65144:0000000:1"t"GSM1588026;GSM1588027;GSM1588028;GSM1588029;GSM1588030;GSM1588031;GSM1588032;GSM1588033;GSM1588034;GSM1588035;GSM1588036;GSM1588037"t"GSM1588038;GSM1588039;GSM1588040;GSM1588041;GSM1588042;GSM1588043;GSM1588044;GSM1588045;GSM1588046;GSM1588047;GSM1588048;GSM1588049;GSM1588050"
"GSE65210"t"GSE65210:0000000:1"t"GSM1589619"t"GSM1589618"
"GSE65222"t"GSE65222:0000000:1"t"GSM1590290;GSM1590291;GSM1590292"t"GSM1590287;GSM1590288;GSM1590289"
"GSE65351"t"GSE65351:0000000:1"t"GSM1593032"t"GSM1593031"
"GSE65351"t"GSE65351:0000000:2"t"GSM1593033"t"GSM1593031"
"GSE65351"t"GSE65351:0000000:3"t"GSM1593034"t"GSM1593031"
"GSE65363"t"GSE65363:0:1"t"GSM1593731;GSM1593732;GSM1593733"t"GSM1593737;GSM1593738;GSM1593739"
"GSE65363"t"GSE65363:1:1"t"GSM1593734;GSM1593735;GSM1593736"t"GSM1593740;GSM1593741;GSM1593742"
"GSE65433"t"GSE65433:0000000:1"t"GSM1596177"t"GSM1596176"
"GSE65577"t"GSE65577:1:1"t"GSM1600428"t"GSM1600427"
"GSE65577"t"GSE65577:1:2"t"GSM1600429"t"GSM1600427"
"GSE65646"t"GSE65646:0:1"t"GSM1602409"t"GSM1602411"
"GSE65646"t"GSE65646:1:1"t"GSM1602410"t"GSM1602412"
"GSE65707"t"GSE65707:0000000:1"t"GSM1603357;GSM1603358;GSM1603359"t"GSM1603354;GSM1603355;GSM1603356"
"GSE65816"t"GSE65816:0000000:1"t"GSM1606703;GSM1606704;GSM1606705"t"GSM1606700;GSM1606701;GSM1606702"
"GSE65816"t"GSE65816:0000000:2"t"GSM1606706;GSM1606707;GSM1606708"t"GSM1606700;GSM1606701;GSM1606702"
"GSE65816"t"GSE65816:0000000:3"t"GSM1606709;GSM1606710;GSM1606711"t"GSM1606700;GSM1606701;GSM1606702"
"GSE65835"t"GSE65835:0000000:1"t"GSM1607357;GSM1607358;GSM1607359"t"GSM1607354;GSM1607355;GSM1607356"
"GSE65835"t"GSE65835:0000000:2"t"GSM1607360;GSM1607361;GSM1607362"t"GSM1607354;GSM1607355;GSM1607356"
"GSE65835"t"GSE65835:0000000:3"t"GSM1607363;GSM1607364;GSM1607365"t"GSM1607354;GSM1607355;GSM1607356"
"GSE65856"t"GSE65856:1:1"t"GSM1607654"t"GSM1607651"
"GSE65856"t"GSE65856:1:2"t"GSM1607657"t"GSM1607651"
"GSE65856"t"GSE65856:1:3"t"GSM1607660"t"GSM1607651"
"GSE65856"t"GSE65856:1:4"t"GSM1607663"t"GSM1607651"
"GSE65856"t"GSE65856:2:1"t"GSM1607655"t"GSM1607652"
"GSE65856"t"GSE65856:2:2"t"GSM1607658"t"GSM1607652"
"GSE65856"t"GSE65856:2:3"t"GSM1607661"t"GSM1607652"
"GSE65856"t"GSE65856:2:4"t"GSM1607664"t"GSM1607652"
"GSE65856"t"GSE65856:3:1"t"GSM1607656"t"GSM1607653"
"GSE65856"t"GSE65856:3:2"t"GSM1607659"t"GSM1607653"
"GSE65856"t"GSE65856:3:3"t"GSM1607662"t"GSM1607653"
"GSE65856"t"GSE65856:3:4"t"GSM1607665"t"GSM1607653"
"GSE65892"t"GSE65892:0000000:1"t"GSM1608425;GSM1608426;GSM1608427"t"GSM1608422;GSM1608423;GSM1608424"
"GSE65965"t"GSE65965:0000000:1"t"GSM1611769;GSM1611770"t"GSM1611767;GSM1611768"
"GSE65965"t"GSE65965:0000000:2"t"GSM1611771;GSM1611772"t"GSM1611767;GSM1611768"
"GSE66354"t"GSE66354:0000000:1"t"GSM1620268;GSM1620269;GSM1620270;GSM1620271;GSM1620272;GSM1620273;GSM1620274"t"GSM1620294;GSM1620295;GSM1620296;GSM1620297;GSM1620298;GSM1620299;GSM1620300;GSM1620301;GSM1620302;GSM1620303;GSM1620304;GSM1620305;GSM1620306"
"GSE66354"t"GSE66354:0000000:2"t"GSM1620175;GSM1620176;GSM1620177;GSM1620178;GSM1620179;GSM1620180;GSM1620181;GSM1620182;GSM1620183;GSM1620184;GSM1620185;GSM1620186;GSM1620187;GSM1620188;GSM1620189;GSM1620190;GSM1620191"t"GSM1620294;GSM1620295;GSM1620296;GSM1620297;GSM1620298;GSM1620299;GSM1620300;GSM1620301;GSM1620302;GSM1620303;GSM1620304;GSM1620305;GSM1620306"
"GSE66354"t"GSE66354:0000000:3"t"GSM1620275;GSM1620276;GSM1620277;GSM1620278;GSM1620279;GSM1620280;GSM1620281;GSM1620282;GSM1620283;GSM1620284;GSM1620285"t"GSM1620294;GSM1620295;GSM1620296;GSM1620297;GSM1620298;GSM1620299;GSM1620300;GSM1620301;GSM1620302;GSM1620303;GSM1620304;GSM1620305;GSM1620306"
"GSE66354"t"GSE66354:0000000:4"t"GSM1620173;GSM1620174;GSM1620256;GSM1620257;GSM1620258;GSM1620259;GSM1620260;GSM1620261;GSM1620262;GSM1620263;GSM1620264;GSM1620265;GSM1620266;GSM1620267"t"GSM1620294;GSM1620295;GSM1620296;GSM1620297;GSM1620298;GSM1620299;GSM1620300;GSM1620301;GSM1620302;GSM1620303;GSM1620304;GSM1620305;GSM1620306"
"GSE66354"t"GSE66354:0000000:5"t"GSM1620307;GSM1620308;GSM1620309;GSM1620310;GSM1620311;GSM1620312;GSM1620313;GSM1620314;GSM1620315;GSM1620316;GSM1620317;GSM1620318;GSM1620319;GSM1620320;GSM1620321"t"GSM1620294;GSM1620295;GSM1620296;GSM1620297;GSM1620298;GSM1620299;GSM1620300;GSM1620301;GSM1620302;GSM1620303;GSM1620304;GSM1620305;GSM1620306"
"GSE66354"t"GSE66354:0000000:6"t"GSM1620192;GSM1620193;GSM1620194;GSM1620195;GSM1620196;GSM1620197;GSM1620198;GSM1620199;GSM1620200;GSM1620201;GSM1620202;GSM1620203;GSM1620204;GSM1620205;GSM1620206;GSM1620207;GSM1620208;GSM1620209;GSM1620210;GSM1620211;GSM1620212;GSM1620213;GSM1620214;GSM1620215;GSM1620216;GSM1620217;GSM1620218;GSM1620219;GSM1620220"t"GSM1620294;GSM1620295;GSM1620296;GSM1620297;GSM1620298;GSM1620299;GSM1620300;GSM1620301;GSM1620302;GSM1620303;GSM1620304;GSM1620305;GSM1620306"
"GSE66354"t"GSE66354:0000000:7"t"GSM1620221;GSM1620222;GSM1620223;GSM1620224;GSM1620225;GSM1620226;GSM1620227;GSM1620228;GSM1620229;GSM1620230;GSM1620231;GSM1620232;GSM1620233;GSM1620234;GSM1620235;GSM1620236;GSM1620237;GSM1620238;GSM1620239;GSM1620240;GSM1620241;GSM1620242;GSM1620243;GSM1620244;GSM1620245;GSM1620246"t"GSM1620294;GSM1620295;GSM1620296;GSM1620297;GSM1620298;GSM1620299;GSM1620300;GSM1620301;GSM1620302;GSM1620303;GSM1620304;GSM1620305;GSM1620306"
"GSE66354"t"GSE66354:0000000:8"t"GSM1620286;GSM1620287;GSM1620288;GSM1620289;GSM1620290;GSM1620291;GSM1620292;GSM1620293"t"GSM1620294;GSM1620295;GSM1620296;GSM1620297;GSM1620298;GSM1620299;GSM1620300;GSM1620301;GSM1620302;GSM1620303;GSM1620304;GSM1620305;GSM1620306"
"GSE66354"t"GSE66354:0000000:9"t"GSM1620247;GSM1620248;GSM1620249;GSM1620250;GSM1620251;GSM1620252;GSM1620253;GSM1620254;GSM1620255"t"GSM1620294;GSM1620295;GSM1620296;GSM1620297;GSM1620298;GSM1620299;GSM1620300;GSM1620301;GSM1620302;GSM1620303;GSM1620304;GSM1620305;GSM1620306"
"GSE66360"t"GSE66360:0000000:1"t"GSM1620832;GSM1620833;GSM1620834;GSM1620835;GSM1620836;GSM1620837;GSM1620838;GSM1620839;GSM1620840;GSM1620841;GSM1620842;GSM1620843;GSM1620844;GSM1620845;GSM1620846;GSM1620847;GSM1620848;GSM1620849;GSM1620850;GSM1620851;GSM1620852;GSM1620877;GSM1620878;GSM1620879;GSM1620880;GSM1620881;GSM1620882;GSM1620883;GSM1620884;GSM1620885;GSM1620886;GSM1620887;GSM1620888;GSM1620889;GSM1620890;GSM1620891;GSM1620905;GSM1620906;GSM1620907;GSM1620908;GSM1620909;GSM1620910;GSM1620911;GSM1620912;GSM1620913;GSM1620914;GSM1620915;GSM1620916;GSM1620917"t"GSM1620819;GSM1620820;GSM1620821;GSM1620822;GSM1620823;GSM1620824;GSM1620825;GSM1620826;GSM1620827;GSM1620828;GSM1620829;GSM1620830;GSM1620831;GSM1620853;GSM1620854;GSM1620855;GSM1620856;GSM1620857;GSM1620858;GSM1620859;GSM1620860;GSM1620861;GSM1620862;GSM1620863;GSM1620864;GSM1620865;GSM1620866;GSM1620867;GSM1620868;GSM1620869;GSM1620870;GSM1620871;GSM1620872;GSM1620873;GSM1620874;GSM1620875;GSM1620876;GSM1620892;GSM1620893;GSM1620894;GSM1620895;GSM1620896;GSM1620897;GSM1620898;GSM1620899;GSM1620900;GSM1620901;GSM1620902;GSM1620903;GSM1620904"
"GSE66384"t"GSE66384:0000000:1"t"GSM1621298;GSM1621299;GSM1621300;GSM1621301;GSM1621302;GSM1621303;GSM1621304"t"GSM1621305;GSM1621306;GSM1621307;GSM1621308;GSM1621309;GSM1621310;GSM1621311"
"GSE66473"t"GSE66473:0000000:1"t"GSM1623077"t"GSM1623076"
"GSE66473"t"GSE66473:0000000:2"t"GSM1623078"t"GSM1623076"
"GSE66473"t"GSE66473:0000000:3"t"GSM1623079"t"GSM1623076"
"GSE66503"t"GSE66503:0000000:1"t"GSM1624172"t"GSM1624173"
"GSE66705"t"GSE66705:0000000:001"t"GSM1629983"t"GSM1629982"
"GSE66705"t"GSE66705:0000000:002"t"GSM1629984"t"GSM1629982"
"GSE66705"t"GSE66705:0000000:003"t"GSM1629985"t"GSM1629982"
"GSE66705"t"GSE66705:0000000:004"t"GSM1629986"t"GSM1629982"
"GSE66705"t"GSE66705:0000000:005"t"GSM1629987"t"GSM1629982"
"GSE66705"t"GSE66705:0000000:006"t"GSM1629988"t"GSM1629982"
"GSE66705"t"GSE66705:0000000:007"t"GSM1629989"t"GSM1629982"
"GSE66705"t"GSE66705:0000000:008"t"GSM1629990"t"GSM1629982"
"GSE66705"t"GSE66705:0000000:009"t"GSM1629991"t"GSM1629982"
"GSE66705"t"GSE66705:0000000:010"t"GSM1629992"t"GSM1629982"
"GSE66705"t"GSE66705:0000000:011"t"GSM1629993"t"GSM1629982"
"GSE66705"t"GSE66705:0000000:012"t"GSM1629994"t"GSM1629982"
"GSE66705"t"GSE66705:0000000:013"t"GSM1629995"t"GSM1629982"
"GSE66705"t"GSE66705:0000000:014"t"GSM1629996"t"GSM1629982"
"GSE66705"t"GSE66705:0000000:015"t"GSM1629997"t"GSM1629982"
"GSE66705"t"GSE66705:0000000:016"t"GSM1629998"t"GSM1629982"
"GSE66705"t"GSE66705:0000000:017"t"GSM1629999"t"GSM1629982"
"GSE66705"t"GSE66705:0000000:018"t"GSM1630000"t"GSM1629982"
"GSE66705"t"GSE66705:0000000:019"t"GSM1630001"t"GSM1629982"
"GSE66705"t"GSE66705:0000000:020"t"GSM1630002"t"GSM1629982"
"GSE66705"t"GSE66705:0000000:021"t"GSM1630003"t"GSM1629982"
"GSE66705"t"GSE66705:0000000:022"t"GSM1630004"t"GSM1629982"
"GSE66705"t"GSE66705:0000000:023"t"GSM1630005"t"GSM1629982"
"GSE66705"t"GSE66705:0000000:024"t"GSM1630006"t"GSM1629982"
"GSE66705"t"GSE66705:0000000:025"t"GSM1630007"t"GSM1629982"
"GSE66705"t"GSE66705:0000000:026"t"GSM1630008"t"GSM1629982"
"GSE66705"t"GSE66705:0000000:027"t"GSM1630009"t"GSM1629982"
"GSE66705"t"GSE66705:0000000:028"t"GSM1630010"t"GSM1629982"
"GSE66705"t"GSE66705:0000000:029"t"GSM1630011"t"GSM1629982"
"GSE66705"t"GSE66705:0000000:030"t"GSM1630012"t"GSM1629982"
"GSE66705"t"GSE66705:0000000:031"t"GSM1630013"t"GSM1629982"
"GSE66705"t"GSE66705:0000000:032"t"GSM1630014"t"GSM1629982"
"GSE66705"t"GSE66705:0000000:033"t"GSM1630015"t"GSM1629982"
"GSE66705"t"GSE66705:0000000:034"t"GSM1630016"t"GSM1629982"
"GSE66705"t"GSE66705:0000000:035"t"GSM1630017"t"GSM1629982"
"GSE66705"t"GSE66705:0000000:036"t"GSM1630018"t"GSM1629982"
"GSE66705"t"GSE66705:0000000:037"t"GSM1630019"t"GSM1629982"
"GSE66705"t"GSE66705:0000000:038"t"GSM1630020"t"GSM1629982"
"GSE66705"t"GSE66705:0000000:039"t"GSM1630021"t"GSM1629982"
"GSE66705"t"GSE66705:0000000:040"t"GSM1630022"t"GSM1629982"
"GSE66705"t"GSE66705:0000000:041"t"GSM1630023"t"GSM1629982"
"GSE66705"t"GSE66705:0000000:042"t"GSM1630024"t"GSM1629982"
"GSE66705"t"GSE66705:0000000:043"t"GSM1630025"t"GSM1629982"
"GSE66705"t"GSE66705:0000000:044"t"GSM1630026"t"GSM1629982"
"GSE66705"t"GSE66705:0000000:045"t"GSM1630027"t"GSM1629982"
"GSE66705"t"GSE66705:0000000:046"t"GSM1630028"t"GSM1629982"
"GSE66705"t"GSE66705:0000000:047"t"GSM1630029"t"GSM1629982"
"GSE66705"t"GSE66705:0000000:048"t"GSM1630030"t"GSM1629982"
"GSE66705"t"GSE66705:0000000:049"t"GSM1630031"t"GSM1629982"
"GSE66705"t"GSE66705:0000000:050"t"GSM1630032"t"GSM1629982"
"GSE66705"t"GSE66705:0000000:051"t"GSM1630033"t"GSM1629982"
"GSE66705"t"GSE66705:0000000:052"t"GSM1630034"t"GSM1629982"
"GSE66705"t"GSE66705:0000000:053"t"GSM1630035"t"GSM1629982"
"GSE66705"t"GSE66705:0000000:054"t"GSM1630036"t"GSM1629982"
"GSE66705"t"GSE66705:0000000:055"t"GSM1630037"t"GSM1629982"
"GSE66705"t"GSE66705:0000000:056"t"GSM1630038"t"GSM1629982"
"GSE66705"t"GSE66705:0000000:057"t"GSM1630039"t"GSM1629982"
"GSE66705"t"GSE66705:0000000:058"t"GSM1630040"t"GSM1629982"
"GSE66705"t"GSE66705:0000000:059"t"GSM1630041"t"GSM1629982"
"GSE66705"t"GSE66705:0000000:060"t"GSM1630042"t"GSM1629982"
"GSE66705"t"GSE66705:0000000:061"t"GSM1630043"t"GSM1629982"
"GSE66705"t"GSE66705:0000000:062"t"GSM1630044"t"GSM1629982"
"GSE66705"t"GSE66705:0000000:063"t"GSM1630045"t"GSM1629982"
"GSE66705"t"GSE66705:0000000:064"t"GSM1630046"t"GSM1629982"
"GSE66705"t"GSE66705:0000000:065"t"GSM1630047"t"GSM1629982"
"GSE66705"t"GSE66705:0000000:066"t"GSM1630048"t"GSM1629982"
"GSE66705"t"GSE66705:0000000:067"t"GSM1630049"t"GSM1629982"
"GSE66705"t"GSE66705:0000000:068"t"GSM1630050"t"GSM1629982"
"GSE66705"t"GSE66705:0000000:069"t"GSM1630051"t"GSM1629982"
"GSE66705"t"GSE66705:0000000:070"t"GSM1630052"t"GSM1629982"
"GSE66705"t"GSE66705:0000000:071"t"GSM1630053"t"GSM1629982"
"GSE66705"t"GSE66705:0000000:072"t"GSM1630054"t"GSM1629982"
"GSE66705"t"GSE66705:0000000:073"t"GSM1630055"t"GSM1629982"
"GSE66705"t"GSE66705:0000000:074"t"GSM1630056"t"GSM1629982"
"GSE66705"t"GSE66705:0000000:075"t"GSM1630057"t"GSM1629982"
"GSE66705"t"GSE66705:0000000:076"t"GSM1630058"t"GSM1629982"
"GSE66705"t"GSE66705:0000000:077"t"GSM1630059"t"GSM1629982"
"GSE66705"t"GSE66705:0000000:078"t"GSM1630060"t"GSM1629982"
"GSE66705"t"GSE66705:0000000:079"t"GSM1630061"t"GSM1629982"
"GSE66705"t"GSE66705:0000000:080"t"GSM1630062"t"GSM1629982"
"GSE66705"t"GSE66705:0000000:081"t"GSM1630063"t"GSM1629982"
"GSE66705"t"GSE66705:0000000:082"t"GSM1630064"t"GSM1629982"
"GSE66705"t"GSE66705:0000000:083"t"GSM1630065"t"GSM1629982"
"GSE66705"t"GSE66705:0000000:084"t"GSM1630066"t"GSM1629982"
"GSE66705"t"GSE66705:0000000:085"t"GSM1630067"t"GSM1629982"
"GSE66705"t"GSE66705:0000000:086"t"GSM1630068"t"GSM1629982"
"GSE66705"t"GSE66705:0000000:087"t"GSM1630069"t"GSM1629982"
"GSE66705"t"GSE66705:0000000:088"t"GSM1630070"t"GSM1629982"
"GSE66705"t"GSE66705:0000000:089"t"GSM1630071"t"GSM1629982"
"GSE66705"t"GSE66705:0000000:090"t"GSM1630072"t"GSM1629982"
"GSE66705"t"GSE66705:0000000:091"t"GSM1630073"t"GSM1629982"
"GSE66705"t"GSE66705:0000000:092"t"GSM1630074"t"GSM1629982"
"GSE66705"t"GSE66705:0000000:093"t"GSM1630075"t"GSM1629982"
"GSE66705"t"GSE66705:0000000:094"t"GSM1630076"t"GSM1629982"
"GSE66705"t"GSE66705:0000000:095"t"GSM1630077"t"GSM1629982"
"GSE66705"t"GSE66705:0000000:096"t"GSM1630078"t"GSM1629982"
"GSE66705"t"GSE66705:0000000:097"t"GSM1630079"t"GSM1629982"
"GSE66705"t"GSE66705:0000000:098"t"GSM1630080"t"GSM1629982"
"GSE66705"t"GSE66705:0000000:099"t"GSM1630081"t"GSM1629982"
"GSE66705"t"GSE66705:0000000:100"t"GSM1630082"t"GSM1629982"
"GSE66705"t"GSE66705:0000000:101"t"GSM1630083"t"GSM1629982"
"GSE66705"t"GSE66705:0000000:102"t"GSM1630084"t"GSM1629982"
"GSE66705"t"GSE66705:0000000:103"t"GSM1630085"t"GSM1629982"
"GSE66705"t"GSE66705:0000000:104"t"GSM1630086"t"GSM1629982"
"GSE66705"t"GSE66705:0000000:105"t"GSM1630087"t"GSM1629982"
"GSE66705"t"GSE66705:0000000:106"t"GSM1630088"t"GSM1629982"
"GSE66705"t"GSE66705:0000000:107"t"GSM1630089"t"GSM1629982"
"GSE66705"t"GSE66705:0000000:108"t"GSM1630090"t"GSM1629982"
"GSE66705"t"GSE66705:0000000:109"t"GSM1630091"t"GSM1629982"
"GSE66705"t"GSE66705:0000000:110"t"GSM1630092"t"GSM1629982"
"GSE66705"t"GSE66705:0000000:111"t"GSM1630093"t"GSM1629982"
"GSE66705"t"GSE66705:0000000:112"t"GSM1630094"t"GSM1629982"
"GSE66705"t"GSE66705:0000000:113"t"GSM1630095"t"GSM1629982"
"GSE66705"t"GSE66705:0000000:114"t"GSM1630096"t"GSM1629982"
"GSE66705"t"GSE66705:0000000:115"t"GSM1630097"t"GSM1629982"
"GSE66705"t"GSE66705:0000000:116"t"GSM1630098"t"GSM1629982"
"GSE66705"t"GSE66705:0000000:117"t"GSM1630099"t"GSM1629982"
"GSE66705"t"GSE66705:0000000:118"t"GSM1630100"t"GSM1629982"
"GSE66705"t"GSE66705:0000000:119"t"GSM1630101"t"GSM1629982"
"GSE66705"t"GSE66705:0000000:120"t"GSM1630102"t"GSM1629982"
"GSE66705"t"GSE66705:0000000:121"t"GSM1630103"t"GSM1629982"
"GSE66705"t"GSE66705:0000000:122"t"GSM1630104"t"GSM1629982"
"GSE66705"t"GSE66705:0000000:123"t"GSM1630105"t"GSM1629982"
"GSE66705"t"GSE66705:0000000:124"t"GSM1630106"t"GSM1629982"
"GSE66705"t"GSE66705:0000000:125"t"GSM1630107"t"GSM1629982"
"GSE66705"t"GSE66705:0000000:126"t"GSM1630108"t"GSM1629982"
"GSE66705"t"GSE66705:0000000:127"t"GSM1630109"t"GSM1629982"
"GSE66705"t"GSE66705:0000000:128"t"GSM1630110"t"GSM1629982"
"GSE66705"t"GSE66705:0000000:129"t"GSM1630111"t"GSM1629982"
"GSE66705"t"GSE66705:0000000:130"t"GSM1630112"t"GSM1629982"
"GSE66705"t"GSE66705:0000000:131"t"GSM1630113"t"GSM1629982"
"GSE66705"t"GSE66705:0000000:132"t"GSM1630114"t"GSM1629982"
"GSE66705"t"GSE66705:0000000:133"t"GSM1630115"t"GSM1629982"
"GSE66705"t"GSE66705:0000000:134"t"GSM1630116"t"GSM1629982"
"GSE66705"t"GSE66705:0000000:135"t"GSM1630117"t"GSM1629982"
"GSE66705"t"GSE66705:0000000:136"t"GSM1630118"t"GSM1629982"
"GSE66705"t"GSE66705:0000000:137"t"GSM1630119"t"GSM1629982"
"GSE66705"t"GSE66705:0000000:138"t"GSM1630120"t"GSM1629982"
"GSE66705"t"GSE66705:0000000:139"t"GSM1630121"t"GSM1629982"
"GSE66705"t"GSE66705:0000000:140"t"GSM1630122"t"GSM1629982"
"GSE66705"t"GSE66705:0000000:141"t"GSM1630123"t"GSM1629982"
"GSE66705"t"GSE66705:0000000:142"t"GSM1630124"t"GSM1629982"
"GSE66705"t"GSE66705:0000000:143"t"GSM1630125"t"GSM1629982"
"GSE66705"t"GSE66705:0000000:144"t"GSM1630126"t"GSM1629982"
"GSE66705"t"GSE66705:0000000:145"t"GSM1630127"t"GSM1629982"
"GSE66705"t"GSE66705:0000000:146"t"GSM1630128"t"GSM1629982"
"GSE66705"t"GSE66705:0000000:147"t"GSM1630129"t"GSM1629982"
"GSE66705"t"GSE66705:0000000:148"t"GSM1630130"t"GSM1629982"
"GSE66705"t"GSE66705:0000000:149"t"GSM1630131"t"GSM1629982"
"GSE66705"t"GSE66705:0000000:150"t"GSM1630132"t"GSM1629982"
"GSE66705"t"GSE66705:0000000:151"t"GSM1630133"t"GSM1629982"
"GSE66705"t"GSE66705:0000000:152"t"GSM1630135"t"GSM1629982"
"GSE66705"t"GSE66705:0000000:153"t"GSM1630137"t"GSM1629982"
"GSE66705"t"GSE66705:0000000:154"t"GSM1630139"t"GSM1629982"
"GSE66705"t"GSE66705:0000000:155"t"GSM1630142"t"GSM1629982"
"GSE66705"t"GSE66705:0000000:156"t"GSM1630144"t"GSM1629982"
"GSE66705"t"GSE66705:0000000:157"t"GSM1630146"t"GSM1629982"
"GSE66705"t"GSE66705:0000000:158"t"GSM1630149"t"GSM1629982"
"GSE66705"t"GSE66705:0000000:159"t"GSM1630151"t"GSM1629982"
"GSE66705"t"GSE66705:0000000:160"t"GSM1630154"t"GSM1629982"
"GSE66705"t"GSE66705:0000000:161"t"GSM1630156"t"GSM1629982"
"GSE66705"t"GSE66705:0000000:162"t"GSM1630158"t"GSM1629982"
"GSE66705"t"GSE66705:0000000:163"t"GSM1630160"t"GSM1629982"
"GSE66705"t"GSE66705:0000000:164"t"GSM1630162"t"GSM1629982"
"GSE66705"t"GSE66705:0000000:165"t"GSM1630163"t"GSM1629982"
"GSE66705"t"GSE66705:0000000:166"t"GSM1630164"t"GSM1629982"
"GSE66705"t"GSE66705:0000000:167"t"GSM1630165"t"GSM1629982"
"GSE66705"t"GSE66705:0000000:168"t"GSM1630166"t"GSM1629982"
"GSE66705"t"GSE66705:0000000:169"t"GSM1630167"t"GSM1629982"
"GSE66705"t"GSE66705:0000000:170"t"GSM1630168"t"GSM1629982"
"GSE66720"t"GSE66720:1:2"t"GSM1630526;GSM1630533"t"GSM1630525;GSM1630532"
"GSE66720"t"GSE66720:2:2"t"GSM1630528;GSM1630535"t"GSM1630527;GSM1630534"
"GSE66720"t"GSE66720:3:2"t"GSM1630530;GSM1630537"t"GSM1630529;GSM1630536"
"GSE66837"t"GSE66837:0:1"t"GSM1633064;GSM1633068;GSM1633072"t"GSM1633063;GSM1633067;GSM1633071"
"GSE66837"t"GSE66837:1:1"t"GSM1633066;GSM1633070;GSM1633074"t"GSM1633065;GSM1633069;GSM1633073"
"GSE66853"t"GSE66853:0:1"t"GSM1633330;GSM1633334;GSM1633338"t"GSM1633329;GSM1633333;GSM1633337"
"GSE66853"t"GSE66853:1:1"t"GSM1633332;GSM1633336;GSM1633340"t"GSM1633331;GSM1633335;GSM1633339"
"GSE66854"t"GSE66854:0:1"t"GSM1633342;GSM1633346;GSM1633350"t"GSM1633341;GSM1633345;GSM1633349"
"GSE66854"t"GSE66854:1:1"t"GSM1633344;GSM1633348;GSM1633352"t"GSM1633343;GSM1633347;GSM1633351"
"GSE66936"t"GSE66936:0000000:1"t"GSM1634610;GSM1634611;GSM1634612;GSM1634613;GSM1634614"t"GSM1634594;GSM1634595;GSM1634596;GSM1634597;GSM1634598;GSM1634599;GSM1634600;GSM1634601;GSM1634602;GSM1634603;GSM1634604;GSM1634605;GSM1634606;GSM1634607;GSM1634608;GSM1634609"
"GSE67051"t"GSE67051:1:1"t"GSM1637496;GSM1637497;GSM1637498"t"GSM1637493;GSM1637494;GSM1637495"
"GSE67051"t"GSE67051:2:1"t"GSM1637502;GSM1637503;GSM1637504"t"GSM1637499;GSM1637500;GSM1637501"
"GSE67066"t"GSE67066:0000000:1"t"GSM1638033;GSM1638034;GSM1638035;GSM1638036;GSM1638037;GSM1638038;GSM1638039;GSM1638040;GSM1638041;GSM1638042;GSM1638043"t"GSM1637993;GSM1637994;GSM1637995;GSM1637996;GSM1637997;GSM1637998;GSM1637999;GSM1638000;GSM1638001;GSM1638002;GSM1638003;GSM1638004;GSM1638005;GSM1638006;GSM1638007;GSM1638008;GSM1638009;GSM1638010;GSM1638011;GSM1638012;GSM1638013;GSM1638014;GSM1638015;GSM1638016;GSM1638017;GSM1638018;GSM1638019;GSM1638020;GSM1638021;GSM1638022;GSM1638023;GSM1638024;GSM1638025;GSM1638026;GSM1638027;GSM1638028;GSM1638029;GSM1638030;GSM1638031;GSM1638032"
"GSE67309"t"GSE67309:1:1"t"GSM1644185"t"GSM1644184"
"GSE67309"t"GSE67309:1:2"t"GSM1644186"t"GSM1644184"
"GSE67309"t"GSE67309:1:3"t"GSM1644187"t"GSM1644184"
"GSE67309"t"GSE67309:2:1"t"GSM1644189"t"GSM1644188"
"GSE67309"t"GSE67309:2:2"t"GSM1644190"t"GSM1644188"
"GSE67309"t"GSE67309:2:3"t"GSM1644191"t"GSM1644188"
"GSE67338"t"GSE67338:0000000:1"t"GSM1645022;GSM1645023;GSM1645024"t"GSM1645019;GSM1645020;GSM1645021"
"GSE67342"t"GSE67342:0:1"t"GSM1645103;GSM1645104;GSM1645105"t"GSM1645100;GSM1645101;GSM1645102"
"GSE67342"t"GSE67342:1:1"t"GSM1645109;GSM1645110;GSM1645111"t"GSM1645106;GSM1645107;GSM1645108"
"GSE67456"t"GSE67456:0000000:1"t"GSM1647376"t"GSM1647377"
"GSE67596"t"GSE67596:1:1"t"GSM1650308;GSM1650309;GSM1650310;GSM1650311;GSM1650312;GSM1650313;GSM1650314;GSM1650315;GSM1650316;GSM1650317;GSM1650318;GSM1650319;GSM1650320;GSM1650321"t"GSM1650330;GSM1650331;GSM1650332;GSM1650333;GSM1650334;GSM1650335;GSM1650336;GSM1650337;GSM1650338;GSM1650339;GSM1650340;GSM1650341;GSM1650342"
"GSE67596"t"GSE67596:1:2"t"GSM1650322;GSM1650323;GSM1650324;GSM1650325;GSM1650326;GSM1650327;GSM1650328;GSM1650329"t"GSM1650330;GSM1650331;GSM1650332;GSM1650333;GSM1650334;GSM1650335;GSM1650336;GSM1650337;GSM1650338;GSM1650339;GSM1650340;GSM1650341;GSM1650342"
"GSE67596"t"GSE67596:2:1"t"GSM1650343;GSM1650344;GSM1650345;GSM1650346;GSM1650347;GSM1650348;GSM1650349;GSM1650350;GSM1650351;GSM1650352;GSM1650353;GSM1650354;GSM1650355;GSM1650356"t"GSM1650365;GSM1650366;GSM1650367;GSM1650368;GSM1650369;GSM1650370;GSM1650371;GSM1650372;GSM1650373;GSM1650374;GSM1650375;GSM1650376;GSM1650377;GSM1650378;GSM1650379"
"GSE67596"t"GSE67596:2:2"t"GSM1650357;GSM1650358;GSM1650359;GSM1650360;GSM1650361;GSM1650362;GSM1650363;GSM1650364"t"GSM1650365;GSM1650366;GSM1650367;GSM1650368;GSM1650369;GSM1650370;GSM1650371;GSM1650372;GSM1650373;GSM1650374;GSM1650375;GSM1650376;GSM1650377;GSM1650378;GSM1650379"
"GSE67738"t"GSE67738:0000000:1"t"GSM1655010;GSM1655012;GSM1655016;GSM1655018;GSM1655019;GSM1655020;GSM1655021;GSM1655022;GSM1655023;GSM1655024;GSM1655027;GSM1655028;GSM1655029;GSM1655034;GSM1655035;GSM1655036;GSM1655037;GSM1655038;GSM1655040;GSM1655042;GSM1655043;GSM1655044;GSM1655046"t"GSM1655009;GSM1655011;GSM1655013;GSM1655014;GSM1655015;GSM1655017;GSM1655025;GSM1655026;GSM1655030;GSM1655031;GSM1655032;GSM1655033;GSM1655039;GSM1655041;GSM1655045"
"GSE67850"t"GSE67850:0000000:01"t"GSM1657152"t"GSM1657151"
"GSE67850"t"GSE67850:0000000:02"t"GSM1657153"t"GSM1657151"
"GSE67850"t"GSE67850:0000000:03"t"GSM1657154"t"GSM1657151"
"GSE67850"t"GSE67850:0000000:04"t"GSM1657155"t"GSM1657151"
"GSE67850"t"GSE67850:0000000:05"t"GSM1657156"t"GSM1657151"
"GSE67850"t"GSE67850:0000000:06"t"GSM1657157"t"GSM1657151"
"GSE67850"t"GSE67850:0000000:07"t"GSM1657158"t"GSM1657151"
"GSE67850"t"GSE67850:0000000:08"t"GSM1657159"t"GSM1657151"
"GSE67850"t"GSE67850:0000000:09"t"GSM1657160"t"GSM1657151"
"GSE67850"t"GSE67850:0000000:10"t"GSM1657161"t"GSM1657151"
"GSE67850"t"GSE67850:0000000:11"t"GSM1657162"t"GSM1657151"
"GSE67850"t"GSE67850:0000000:12"t"GSM1657163"t"GSM1657151"
"GSE67850"t"GSE67850:0000000:13"t"GSM1657164"t"GSM1657151"
"GSE67850"t"GSE67850:0000000:14"t"GSM1657165"t"GSM1657151"
"GSE67850"t"GSE67850:0000000:15"t"GSM1657166"t"GSM1657151"
"GSE67850"t"GSE67850:0000000:16"t"GSM1657167"t"GSM1657151"
"GSE67850"t"GSE67850:0000000:17"t"GSM1657168"t"GSM1657151"
"GSE67850"t"GSE67850:0000000:18"t"GSM1657169"t"GSM1657151"
"GSE67850"t"GSE67850:0000000:19"t"GSM1657170"t"GSM1657151"
"GSE67850"t"GSE67850:0000000:20"t"GSM1657171"t"GSM1657151"
"GSE67850"t"GSE67850:0000000:21"t"GSM1657172"t"GSM1657151"
